# Supplementary material for: Mass spectrometric analysis of purine de novo biosynthesis intermediates
Source: PubMed Central journal article supplement (PMC6287904; doi:10.1371/journal.pone.0208947), 2018-12-10

# GAR

MS<sup>2</sup>

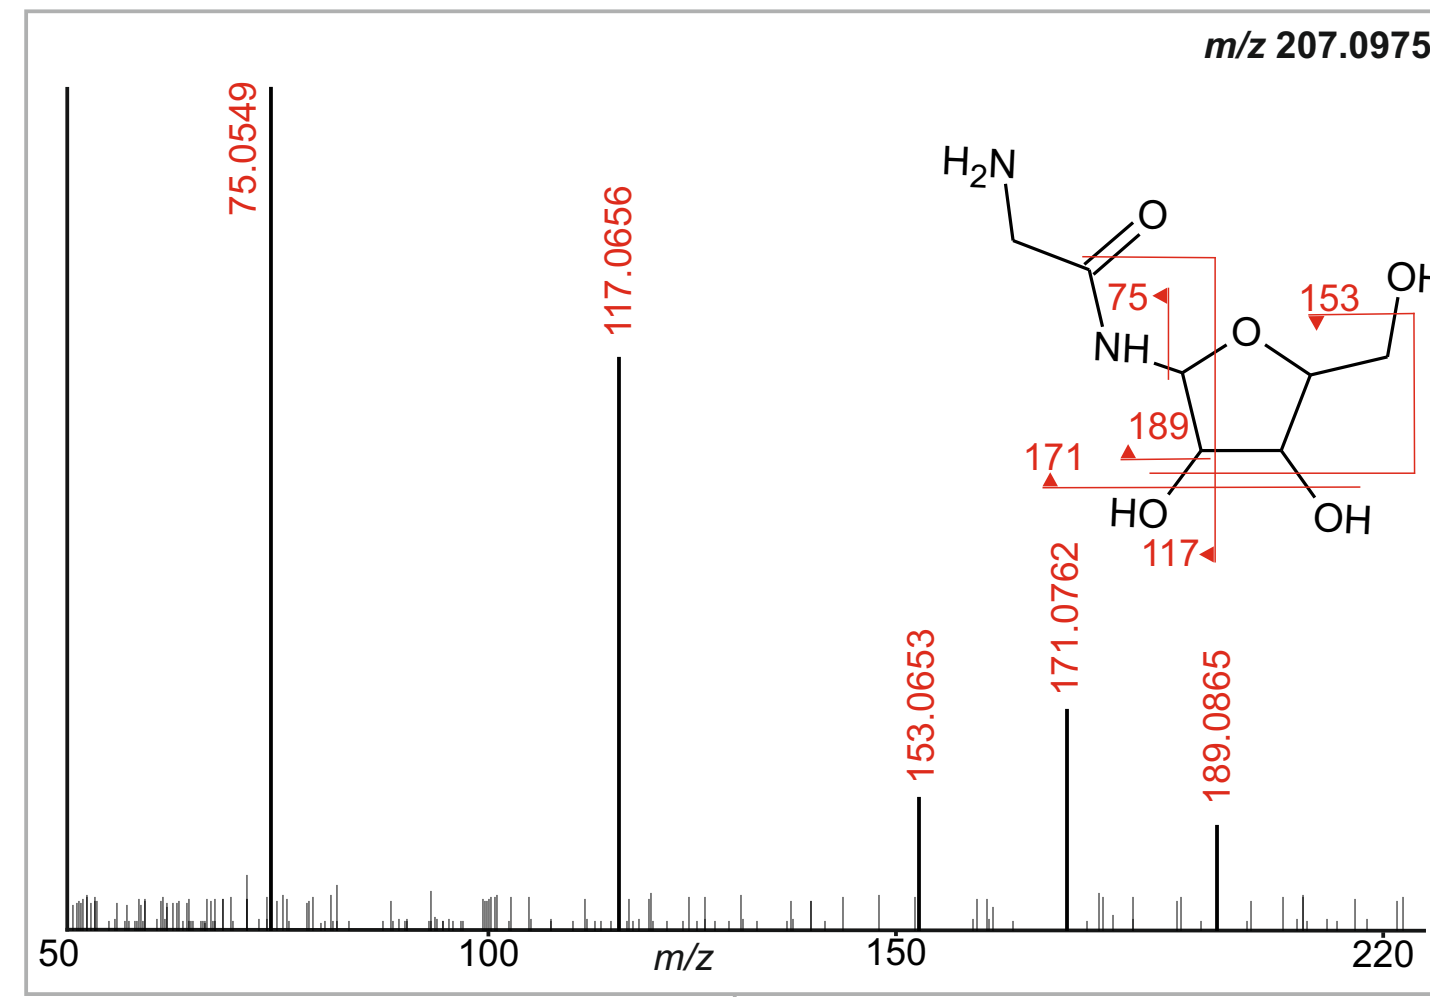

MS<sup>3</sup>

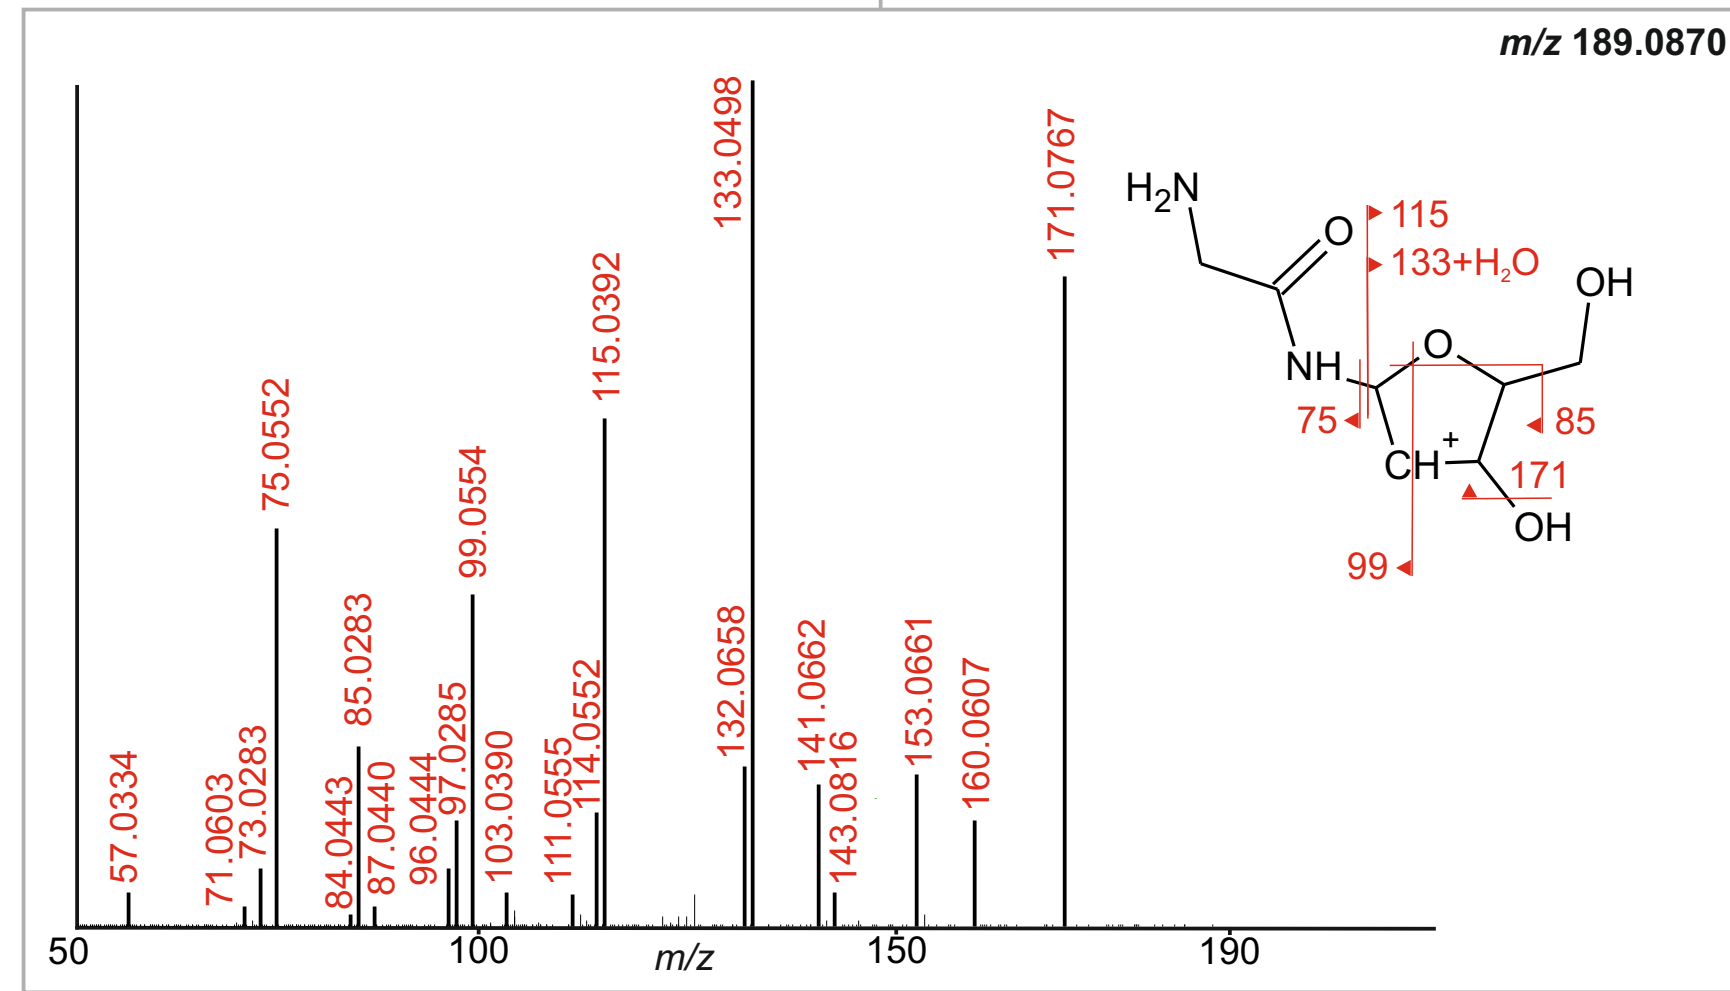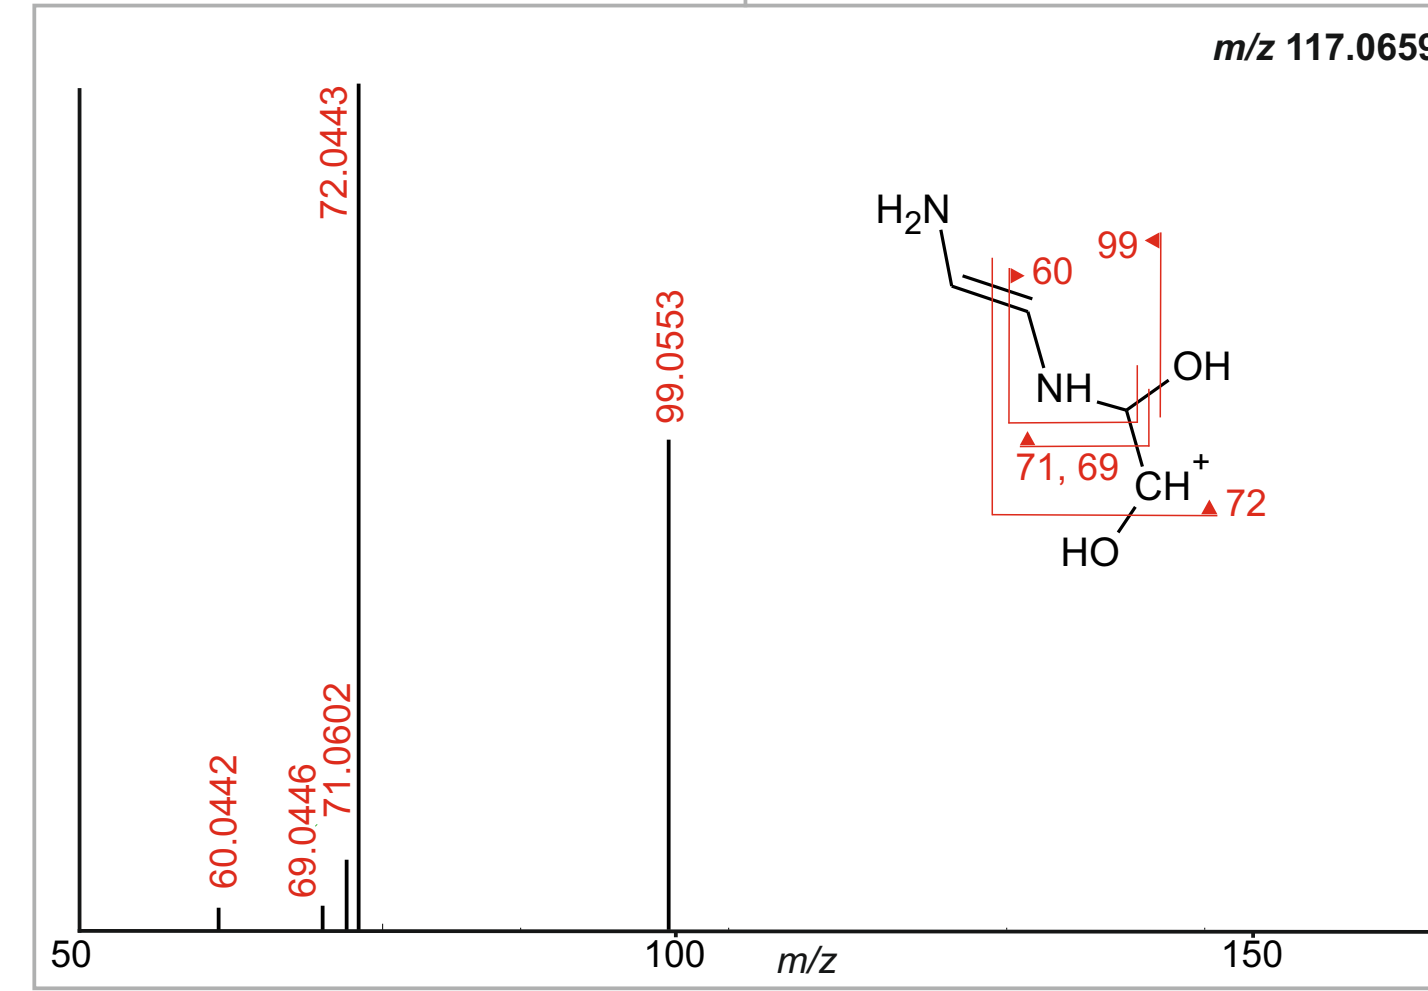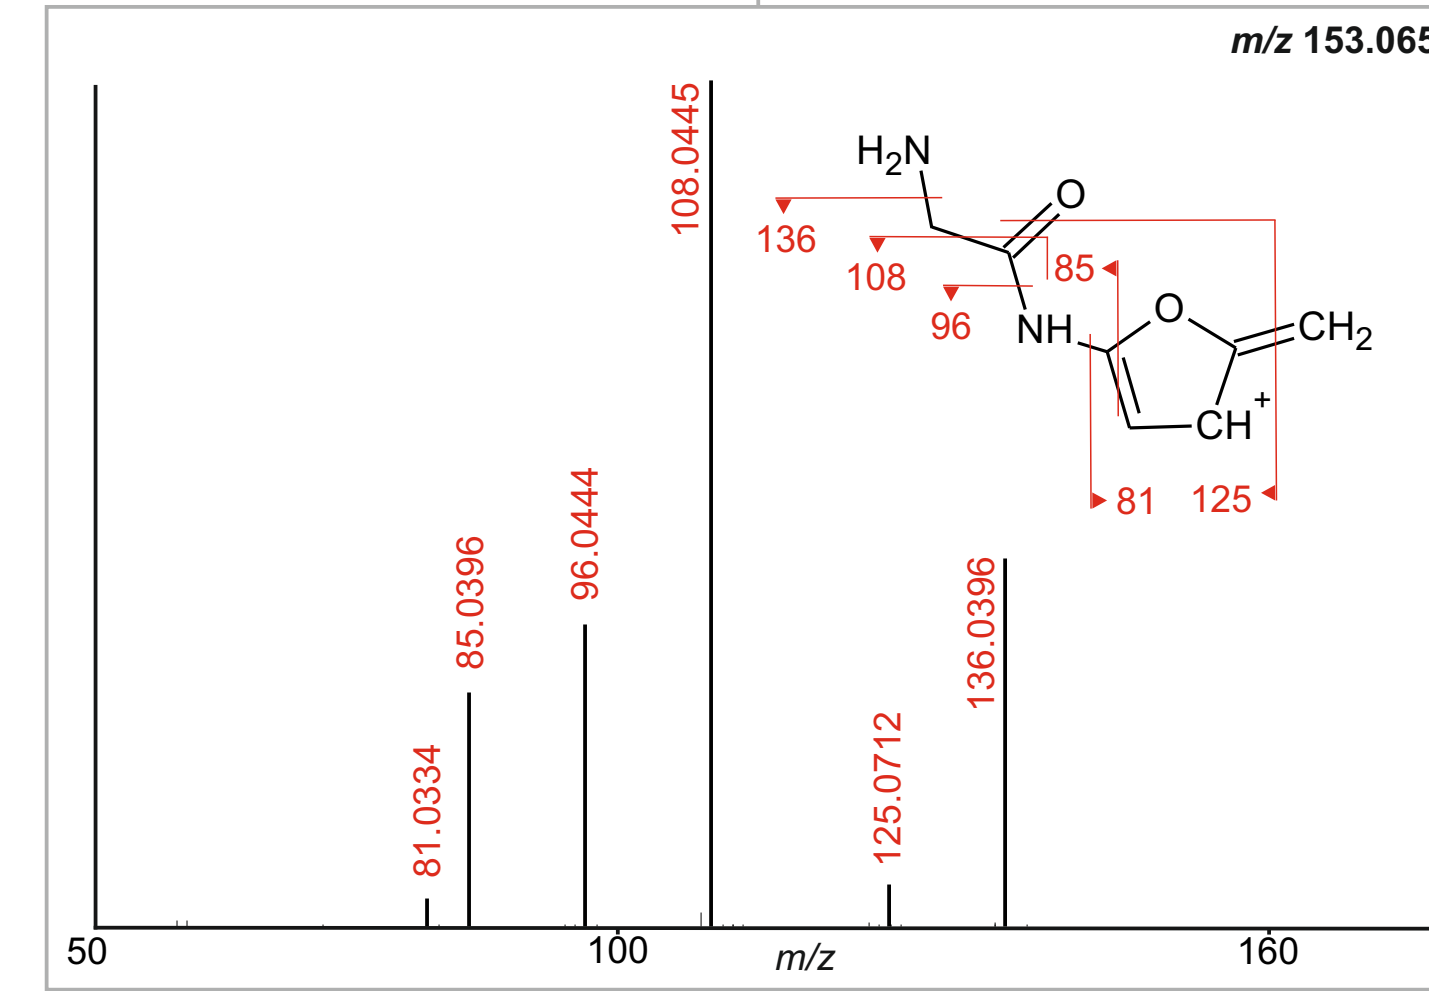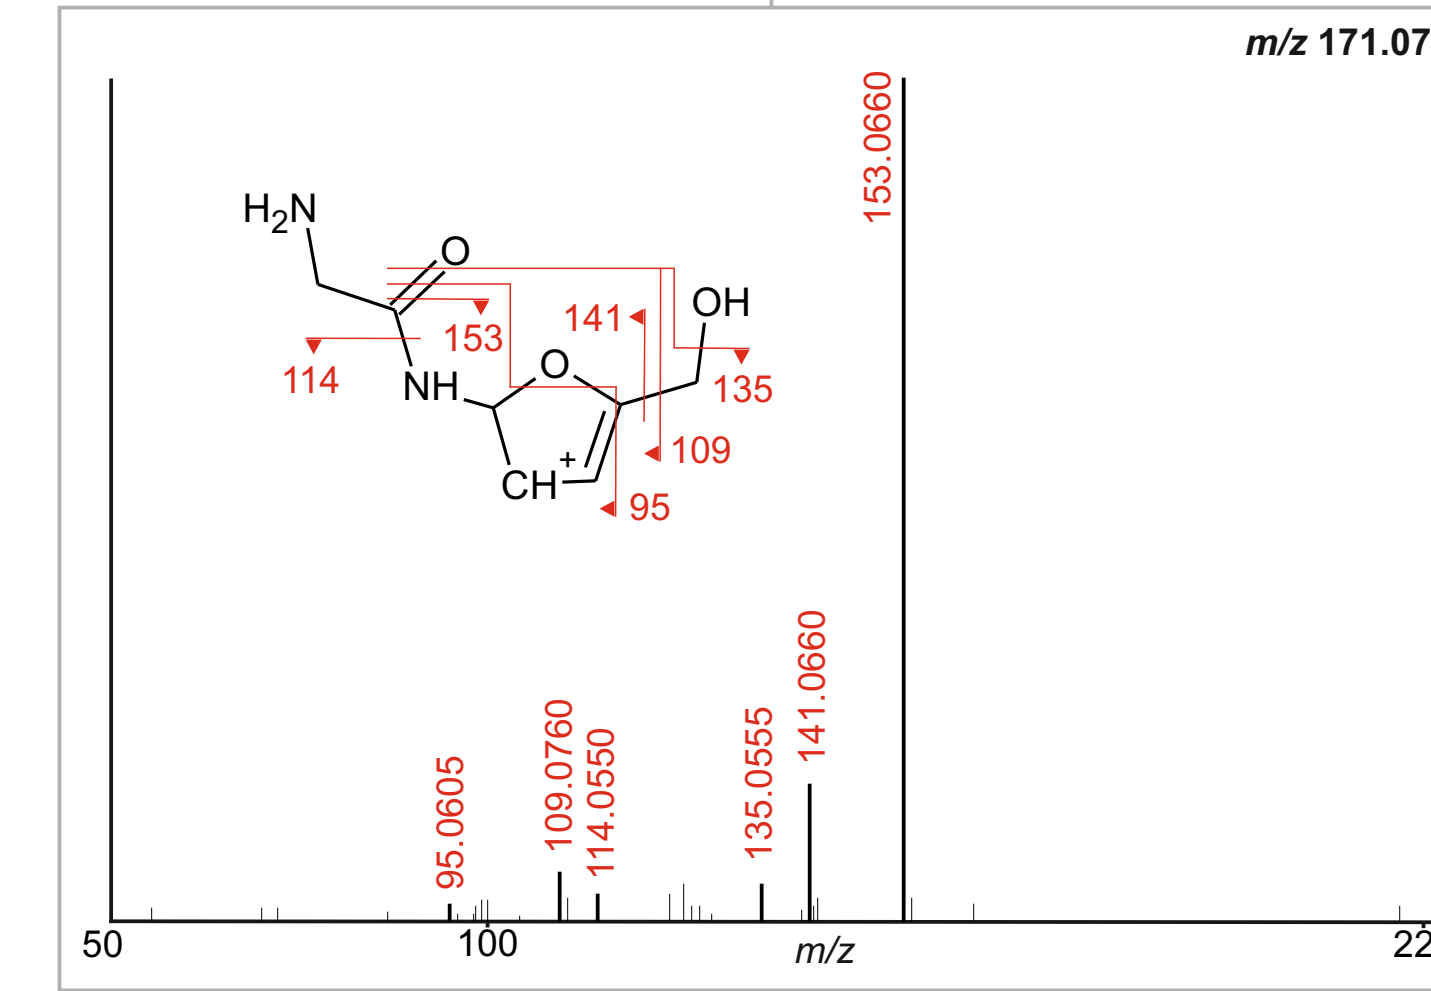

MS<sup>4</sup>

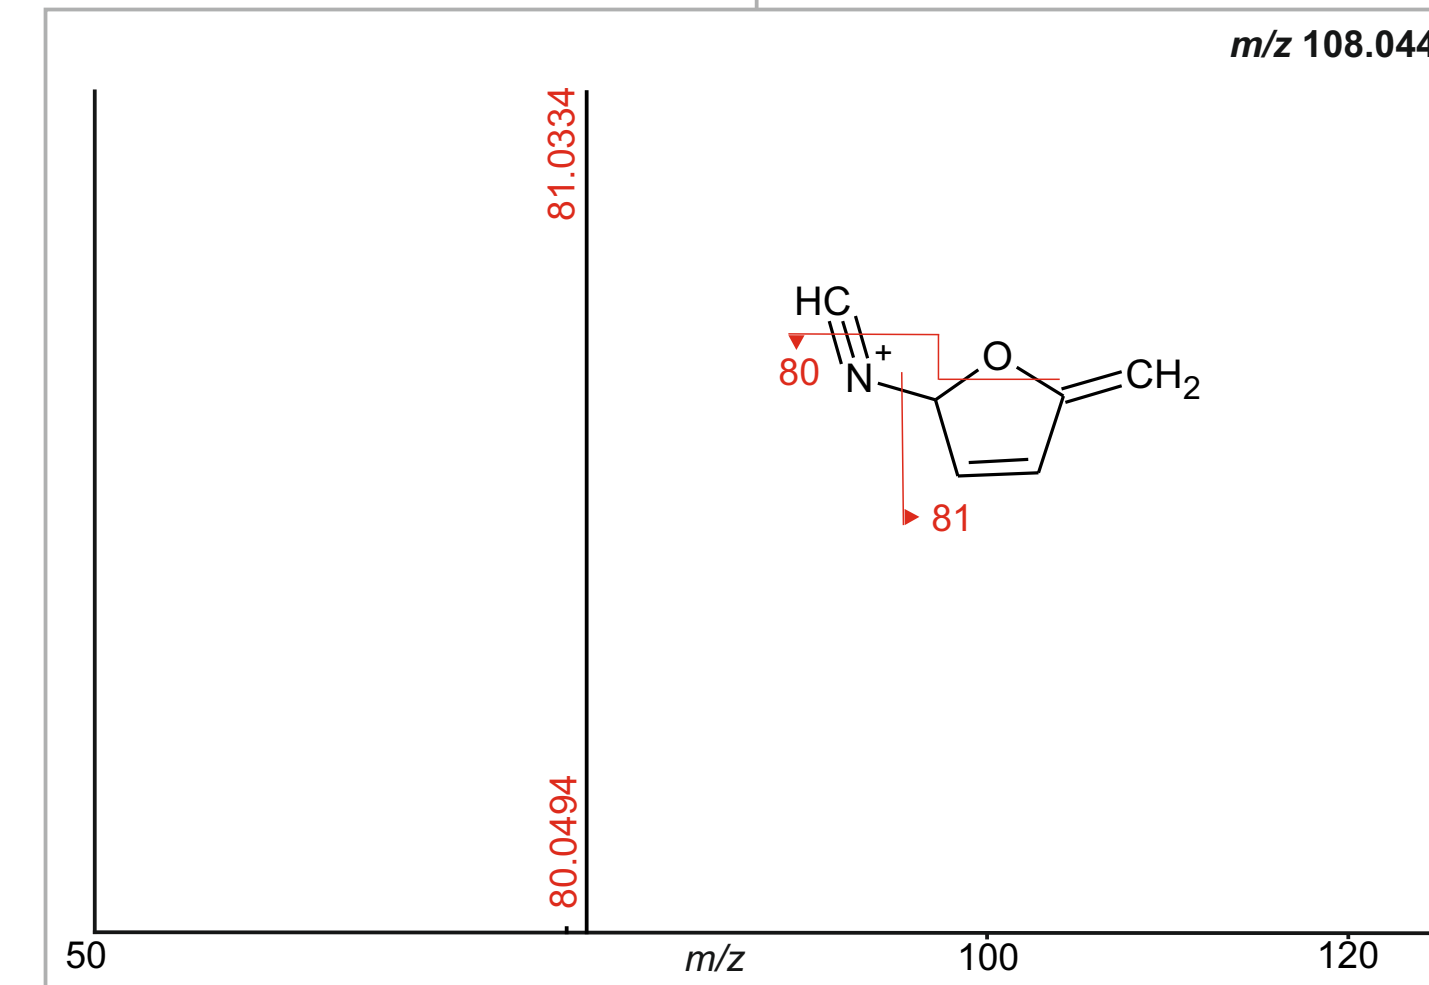

MS<sup>2</sup>

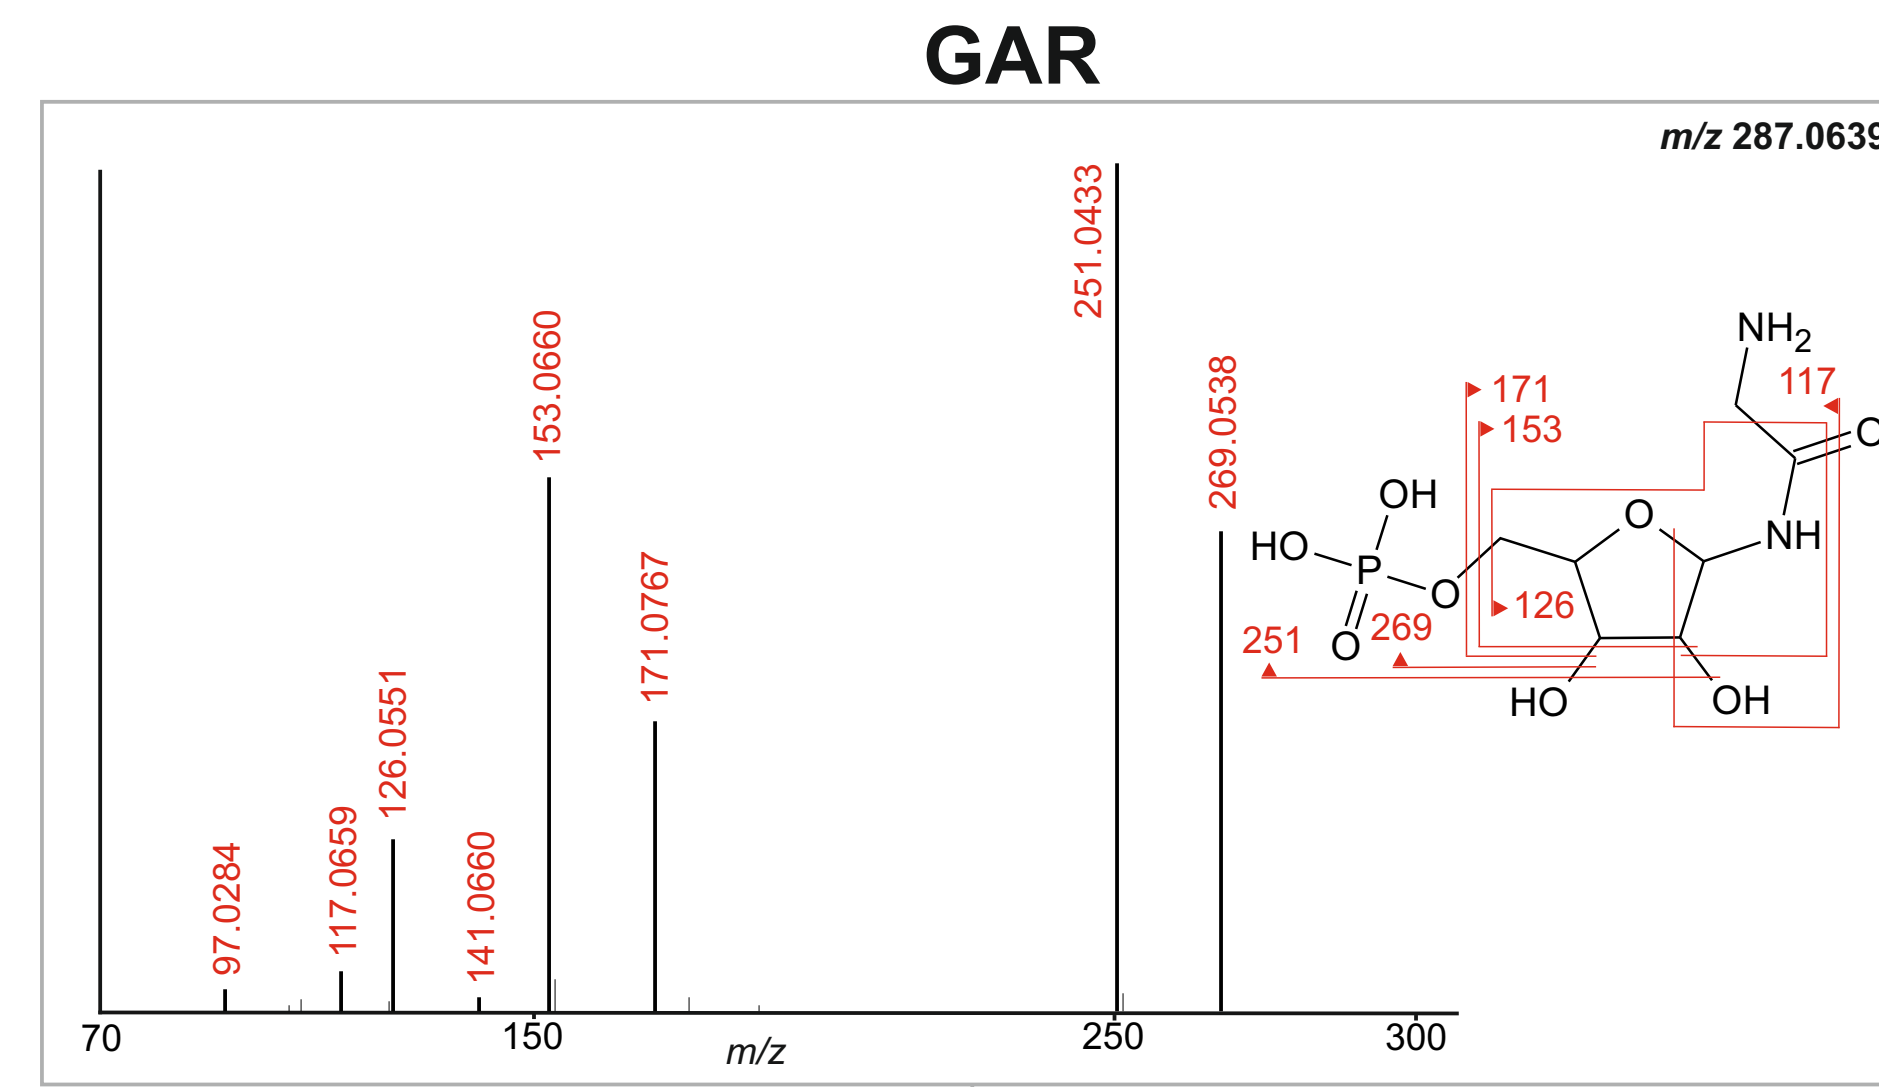

MS<sup>3</sup>

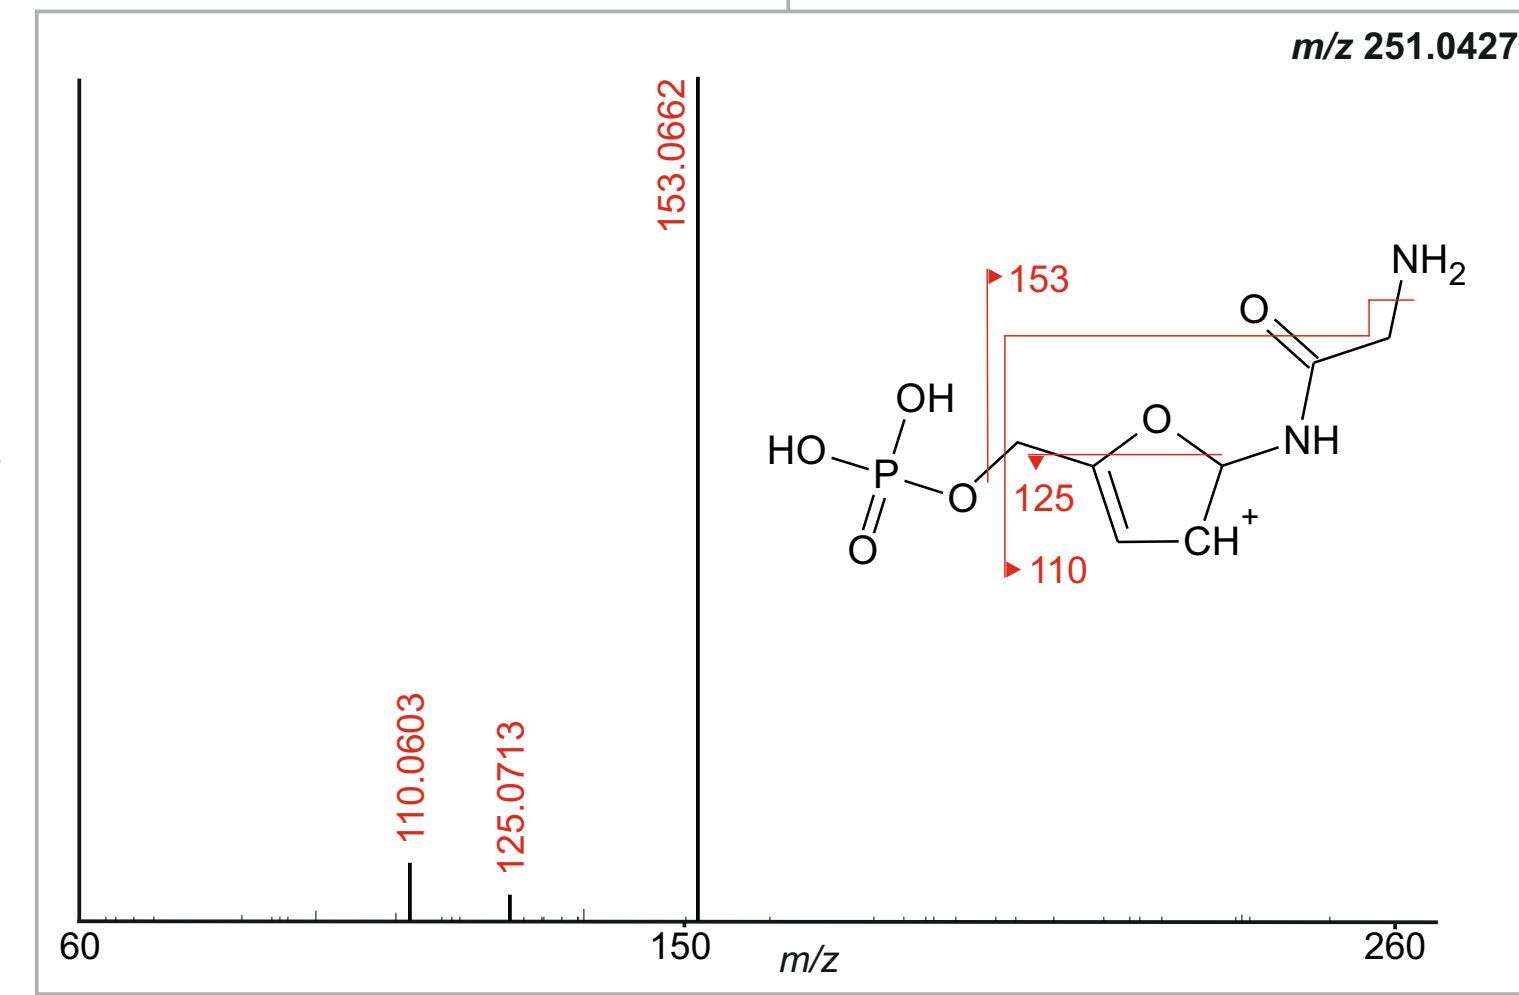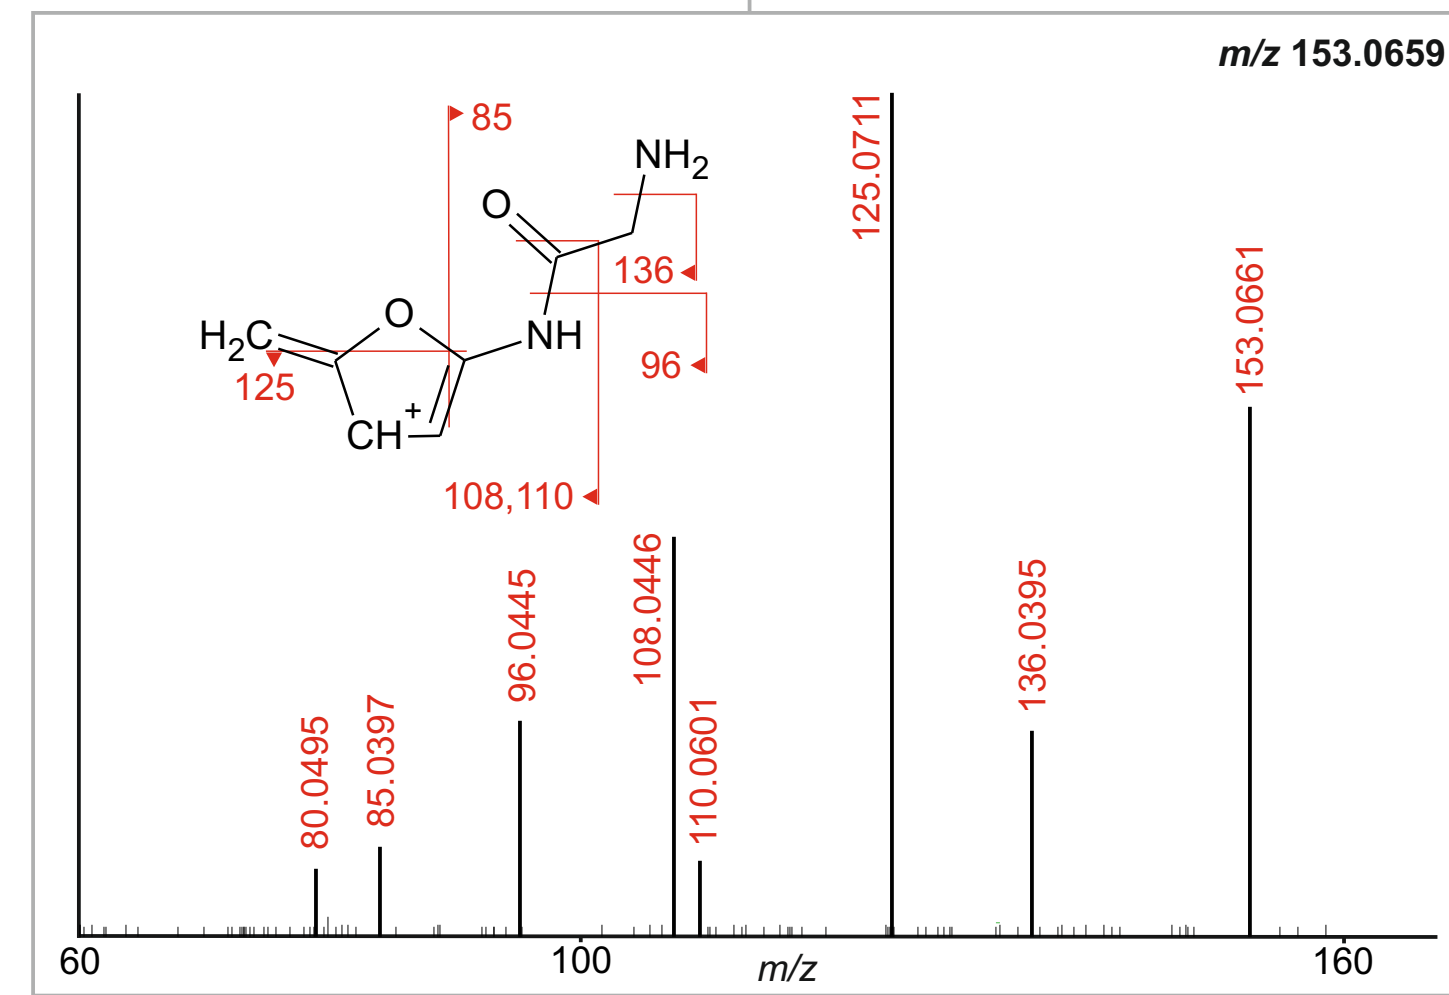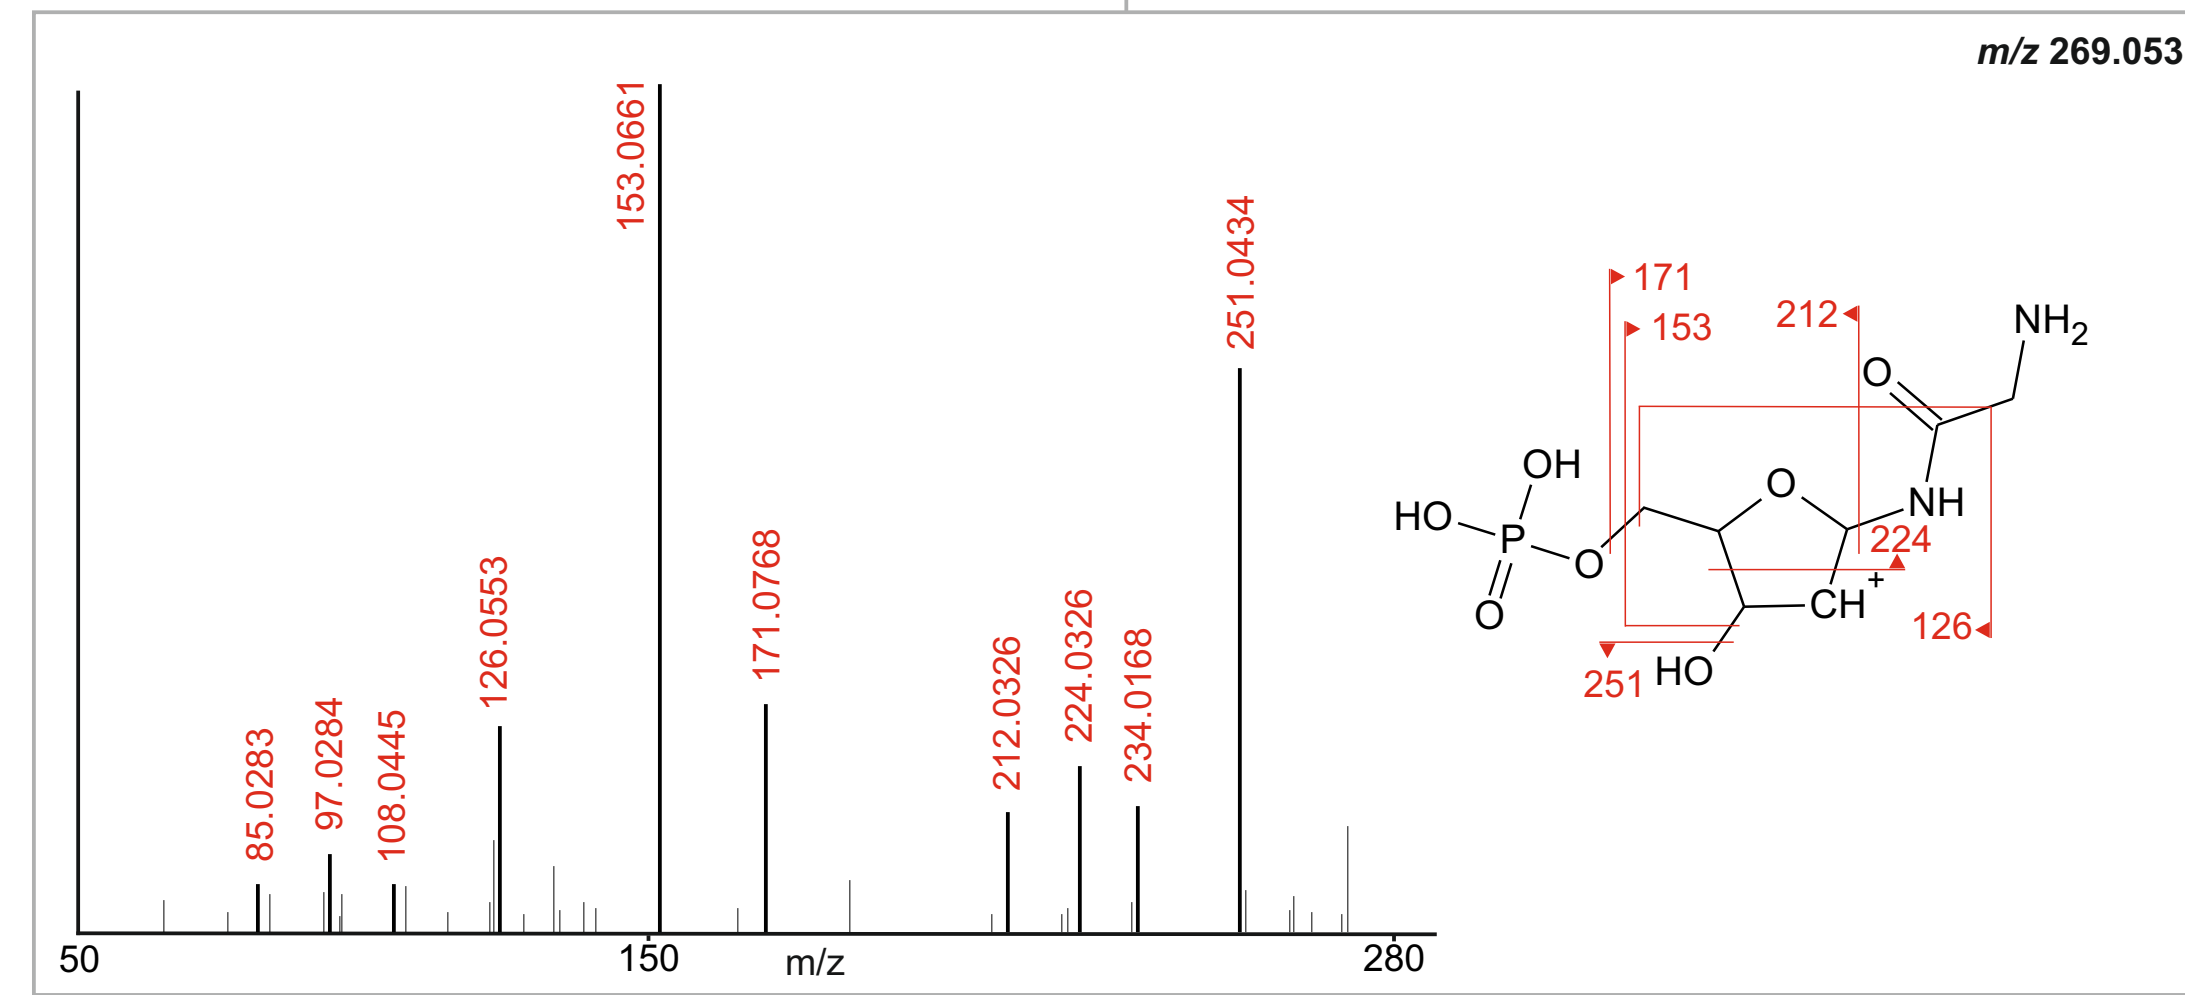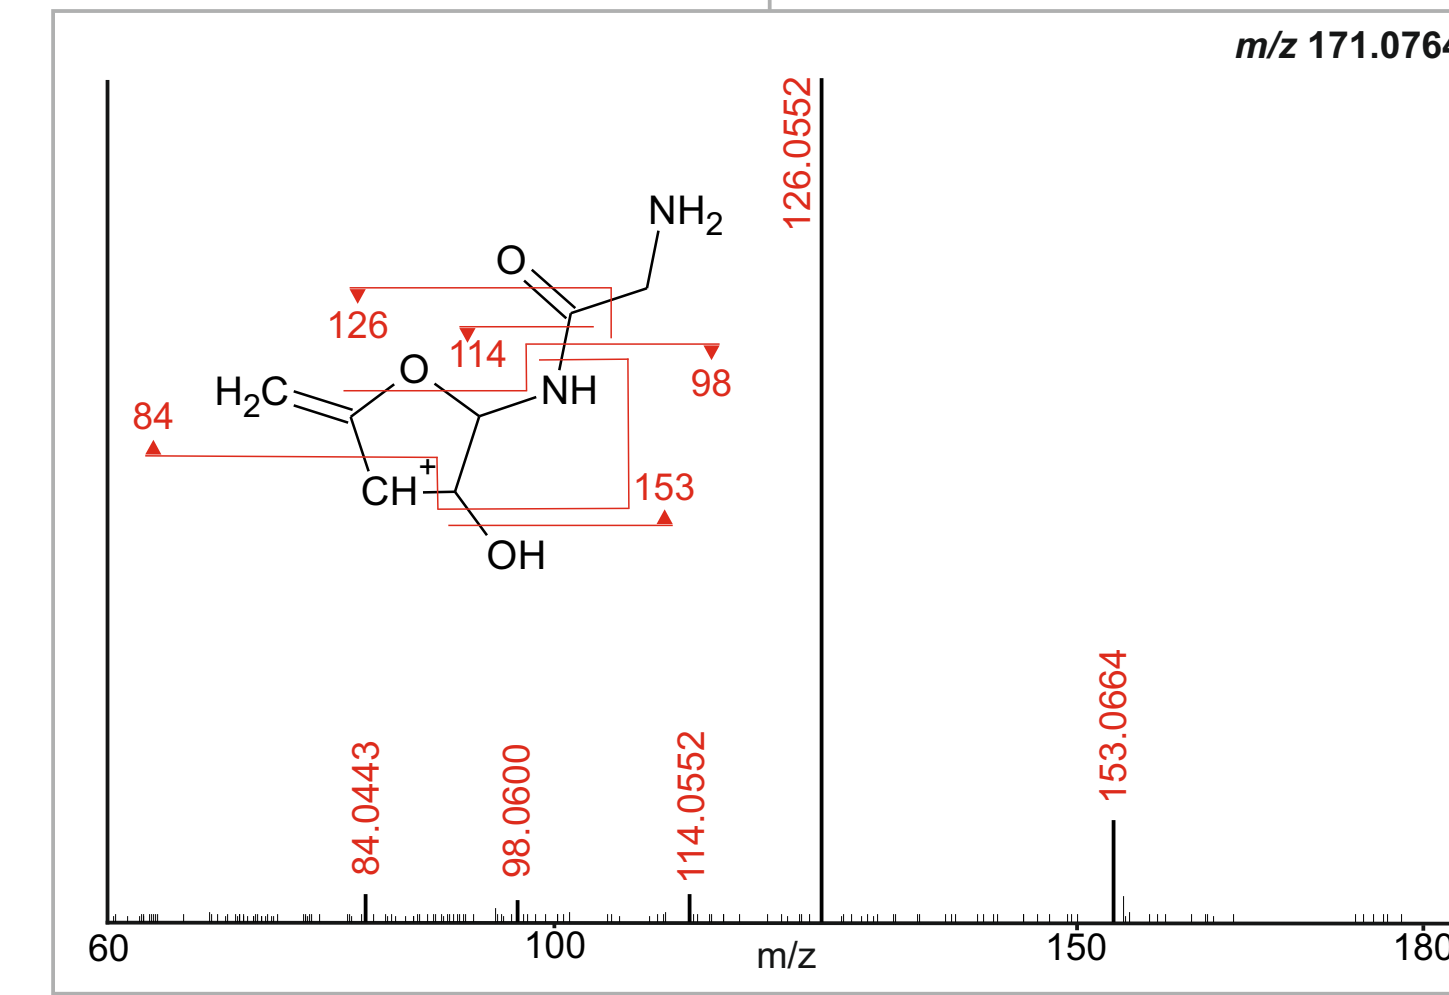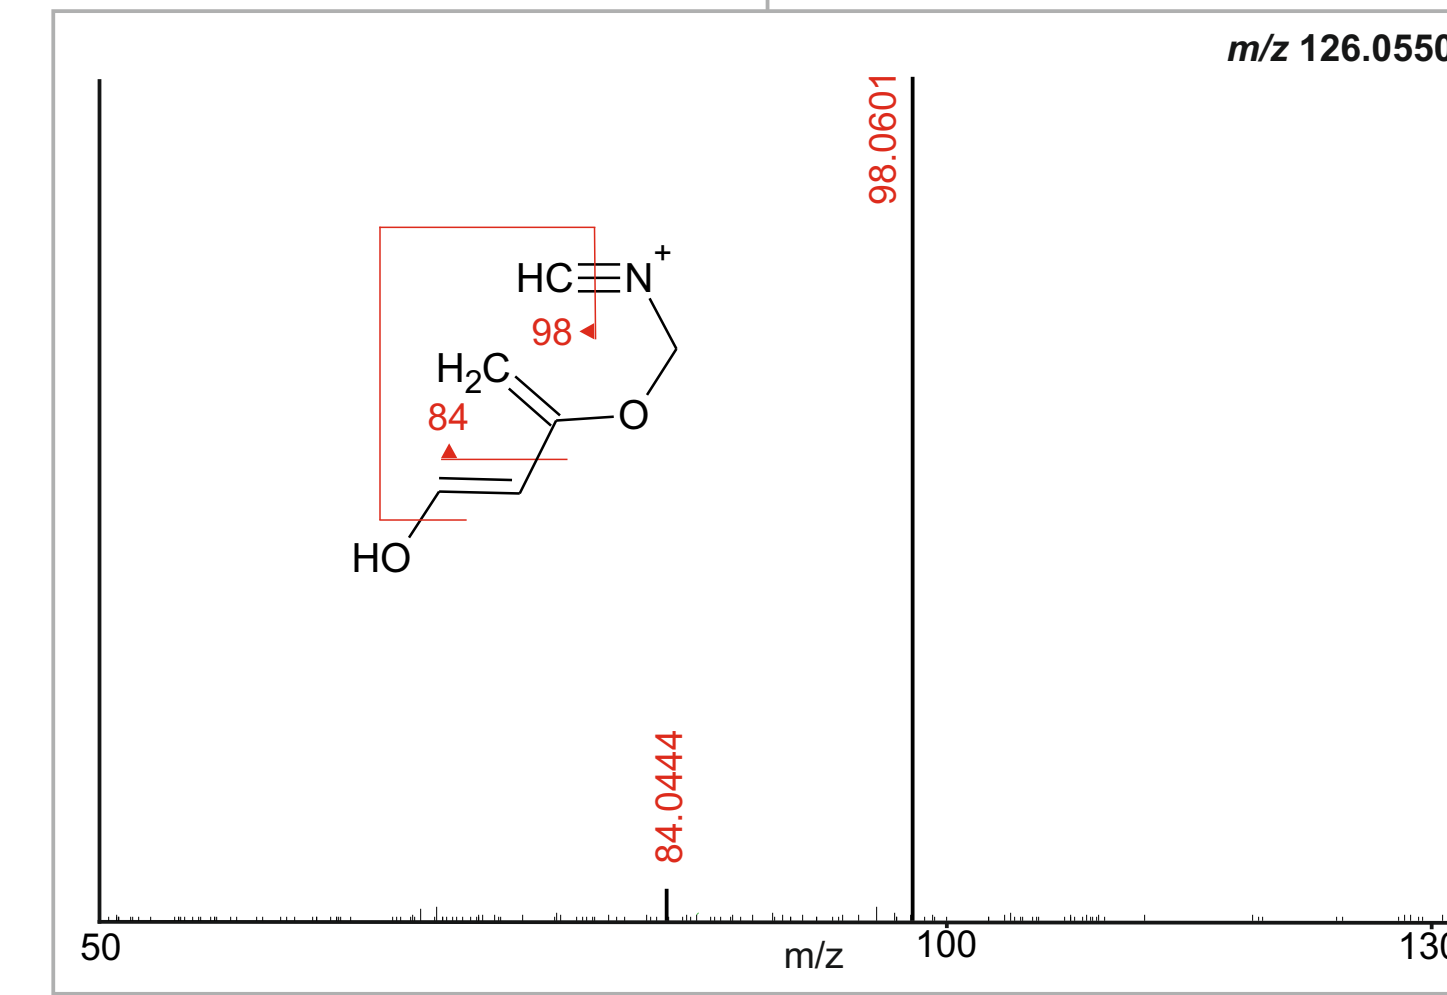

MS<sup>4</sup>

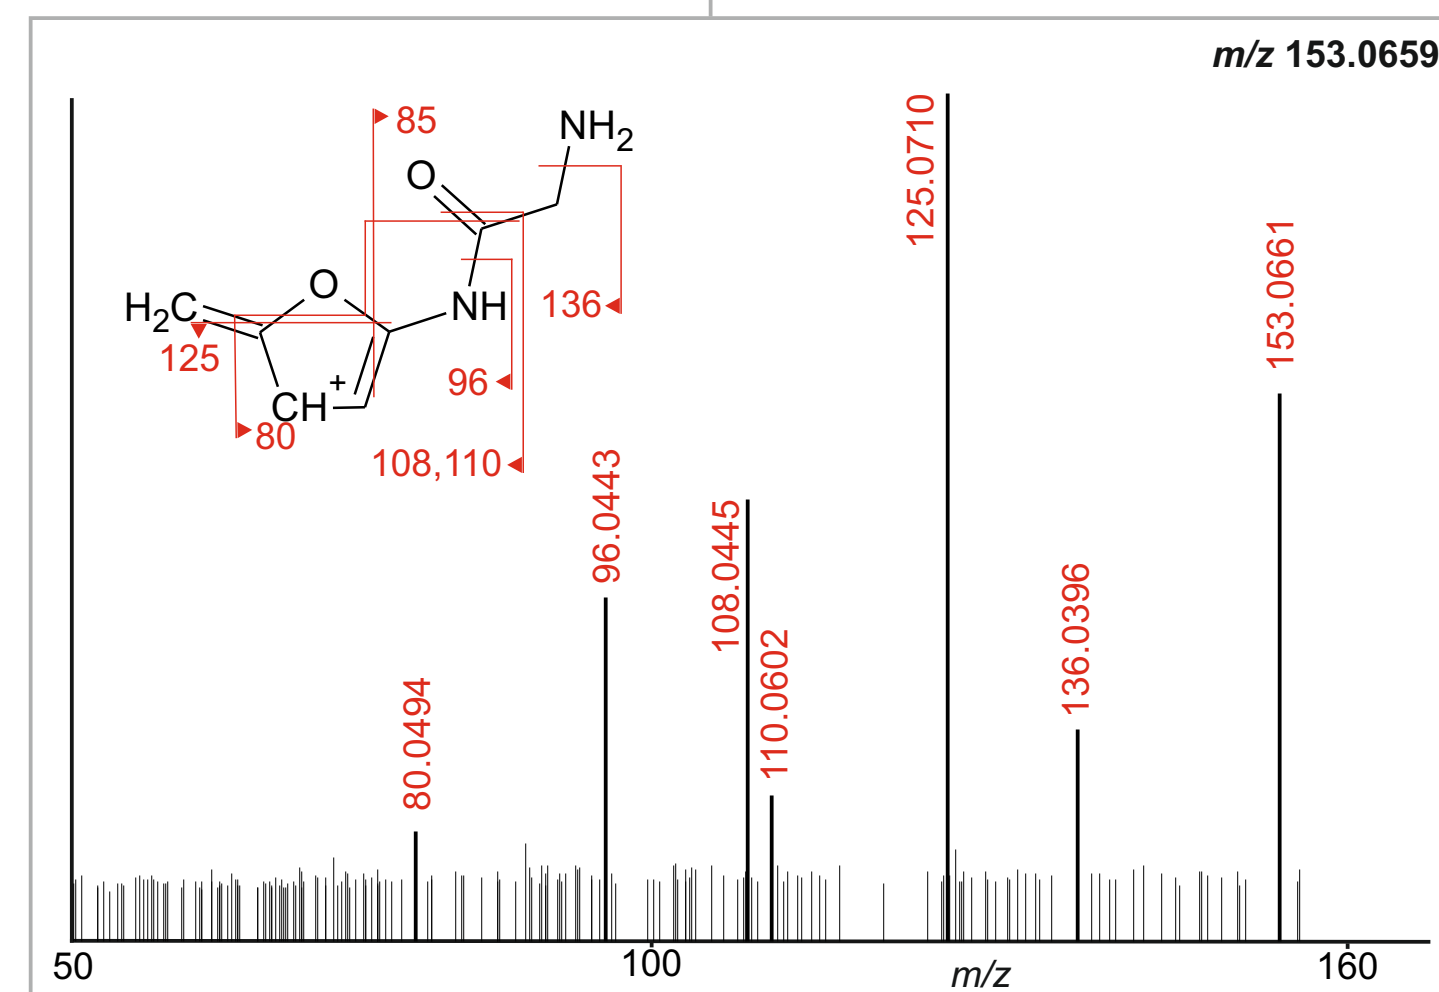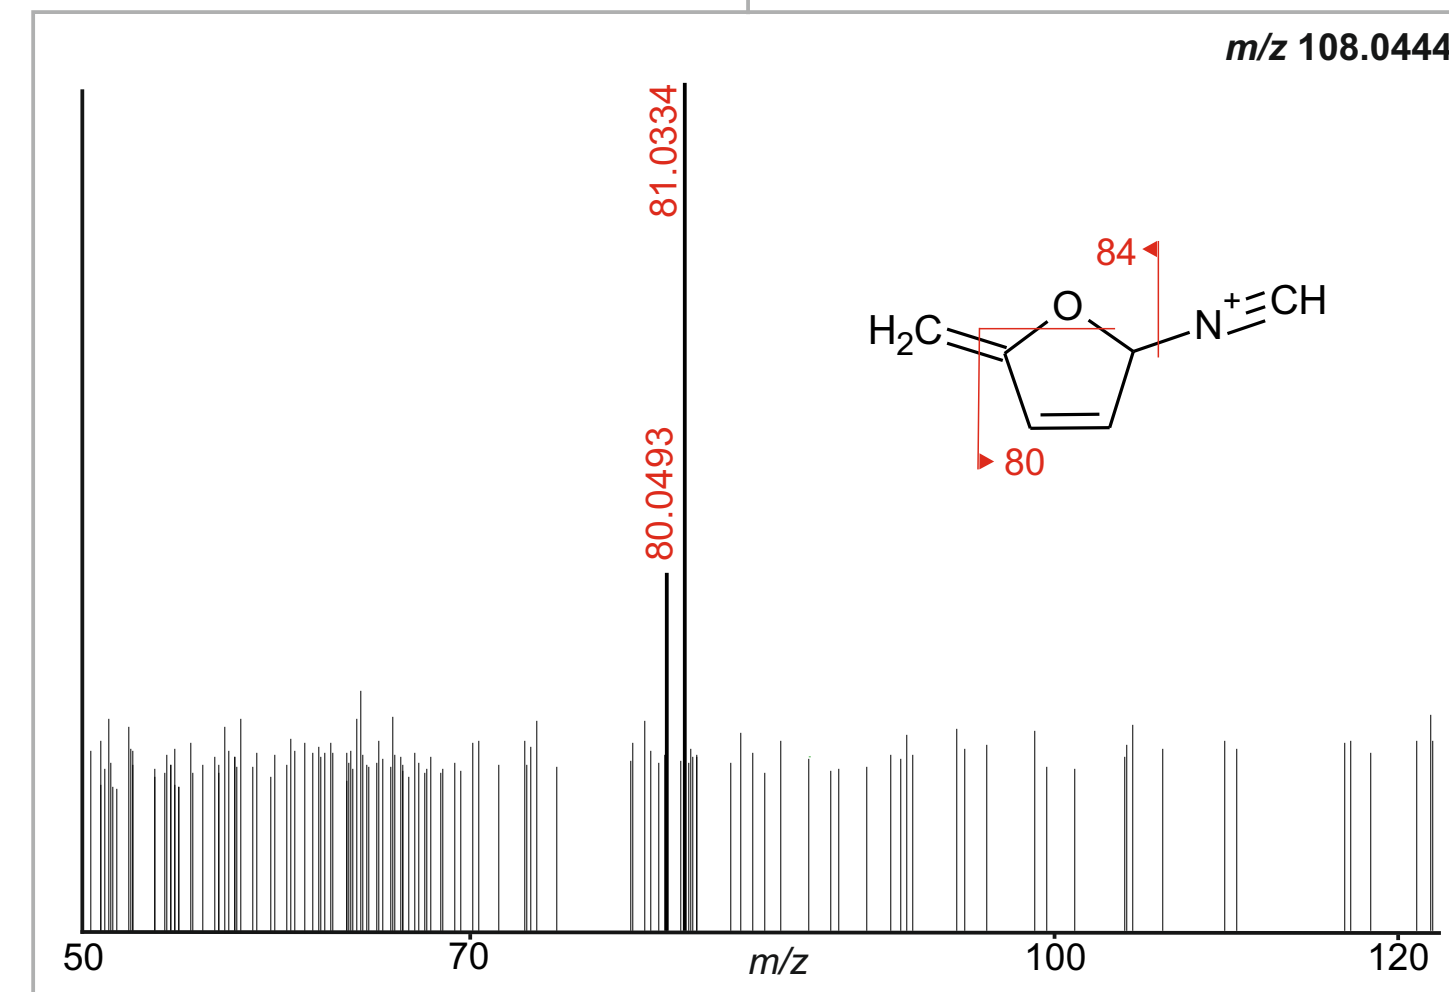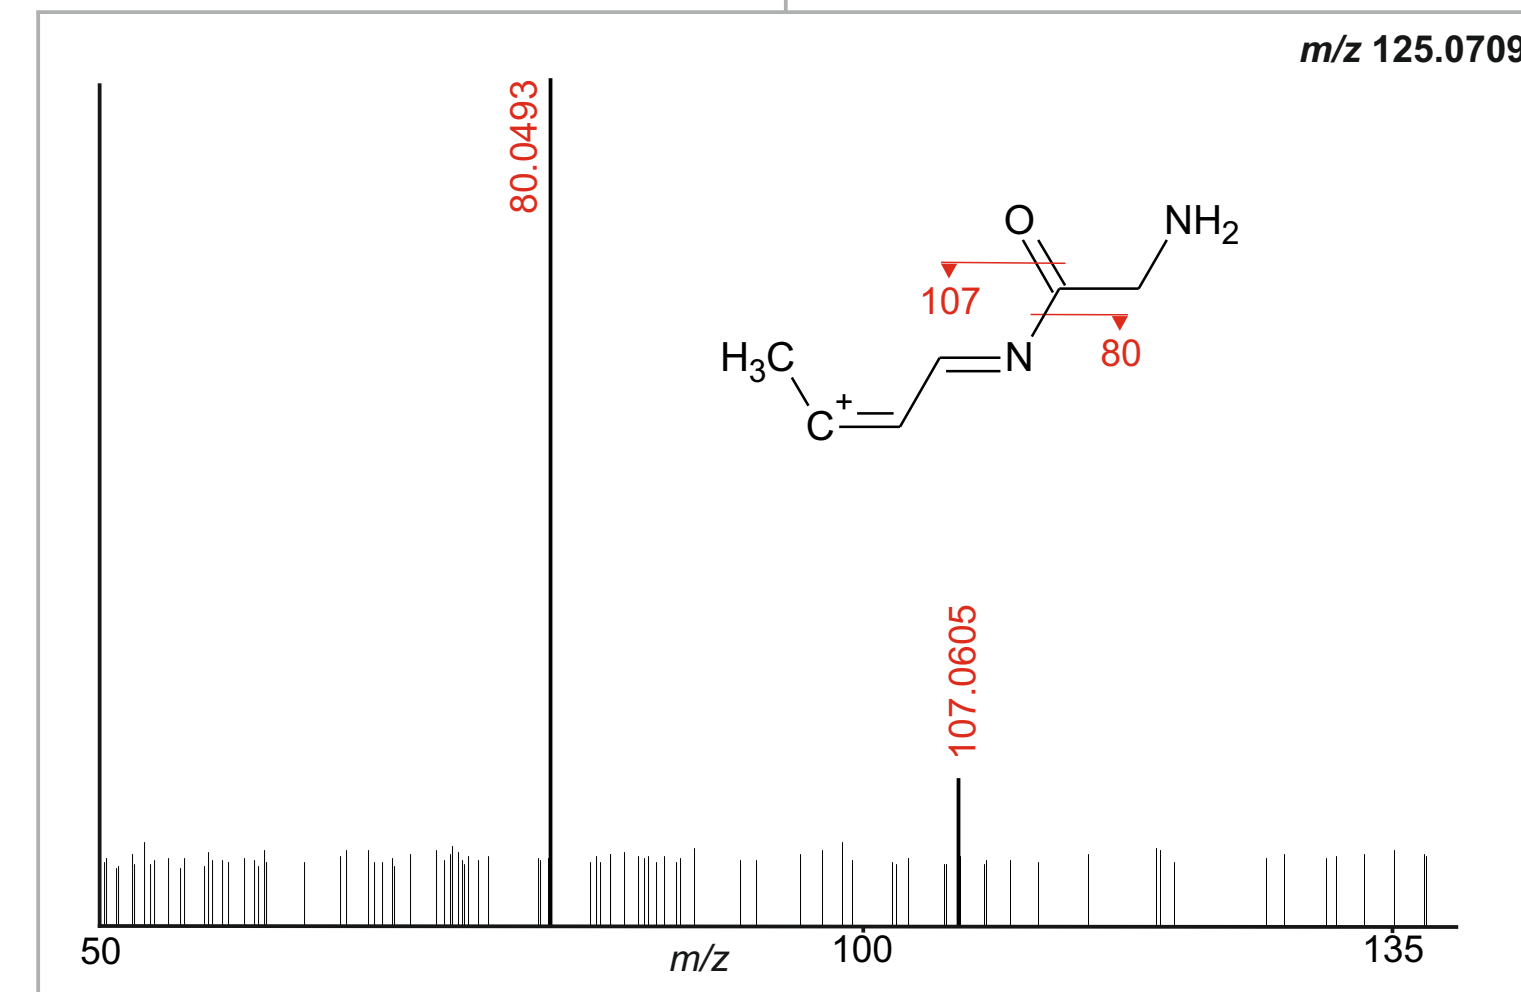

MS<sup>2</sup>

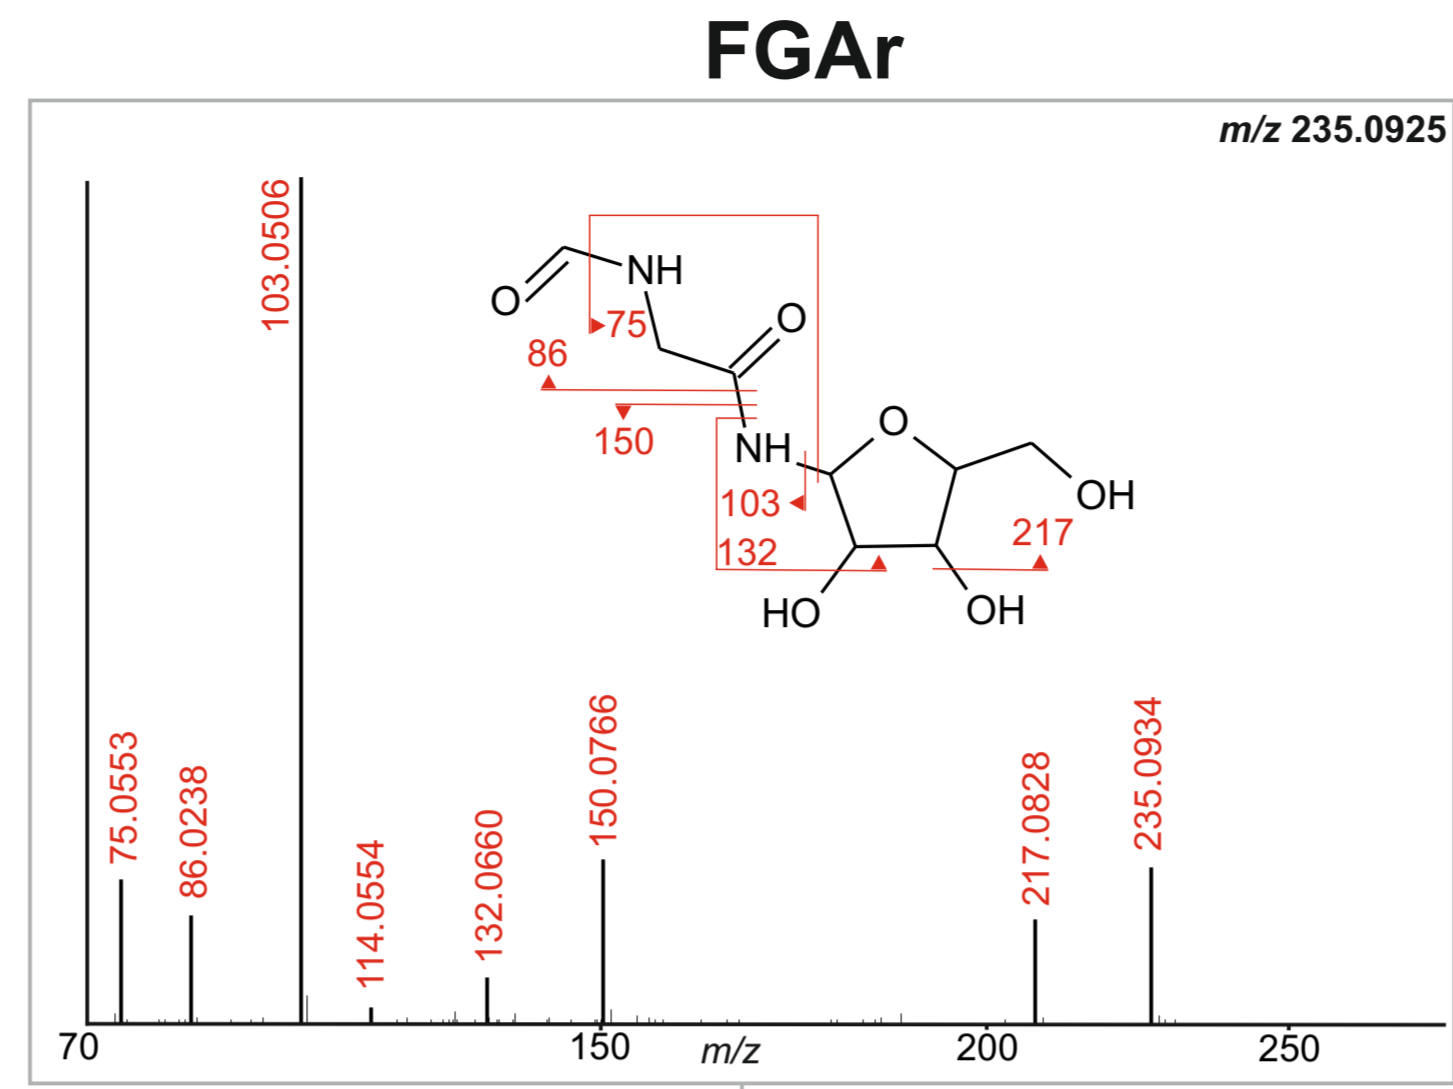

MS<sup>3</sup>

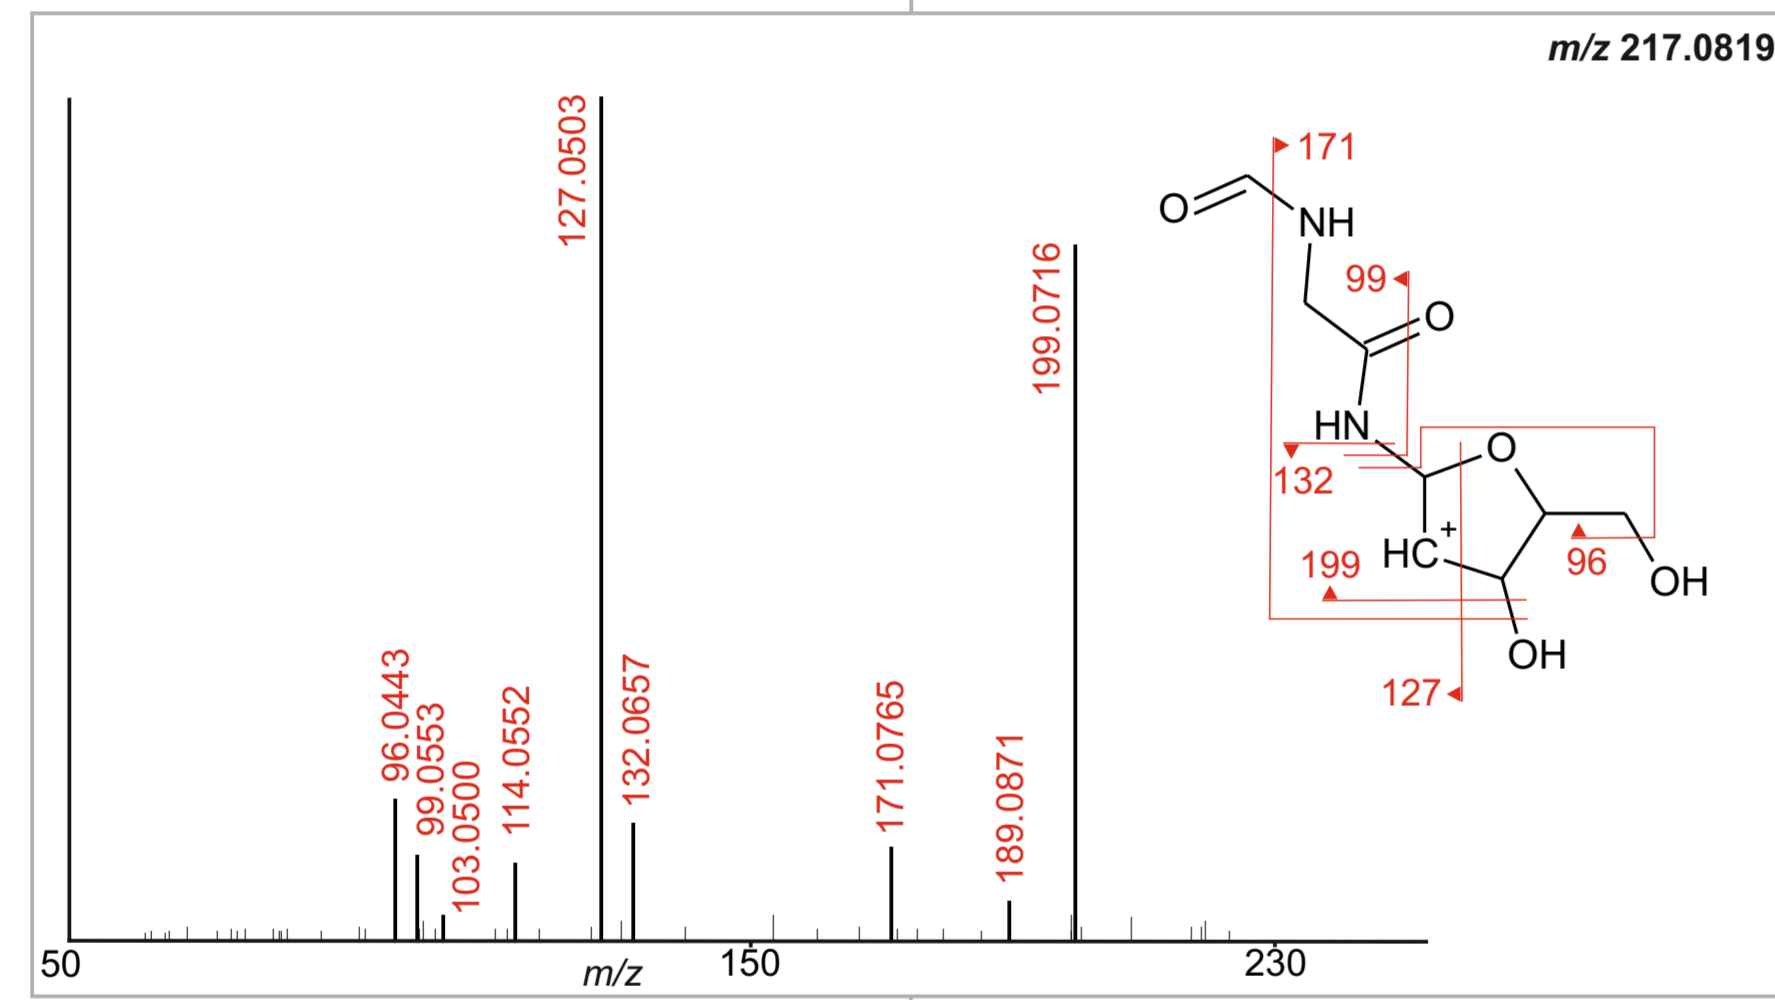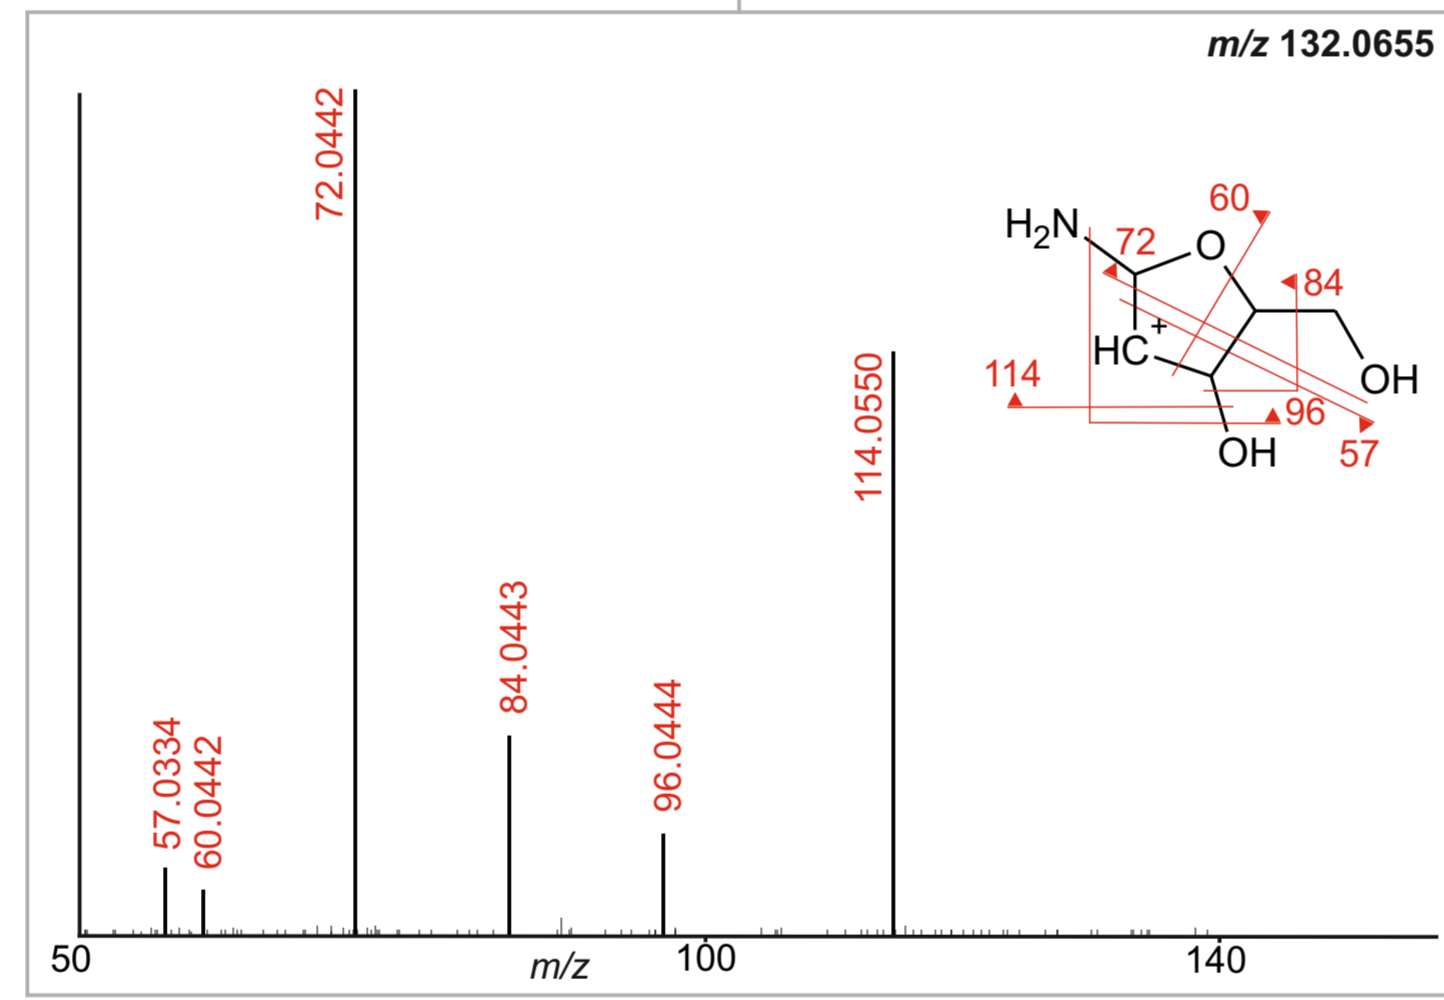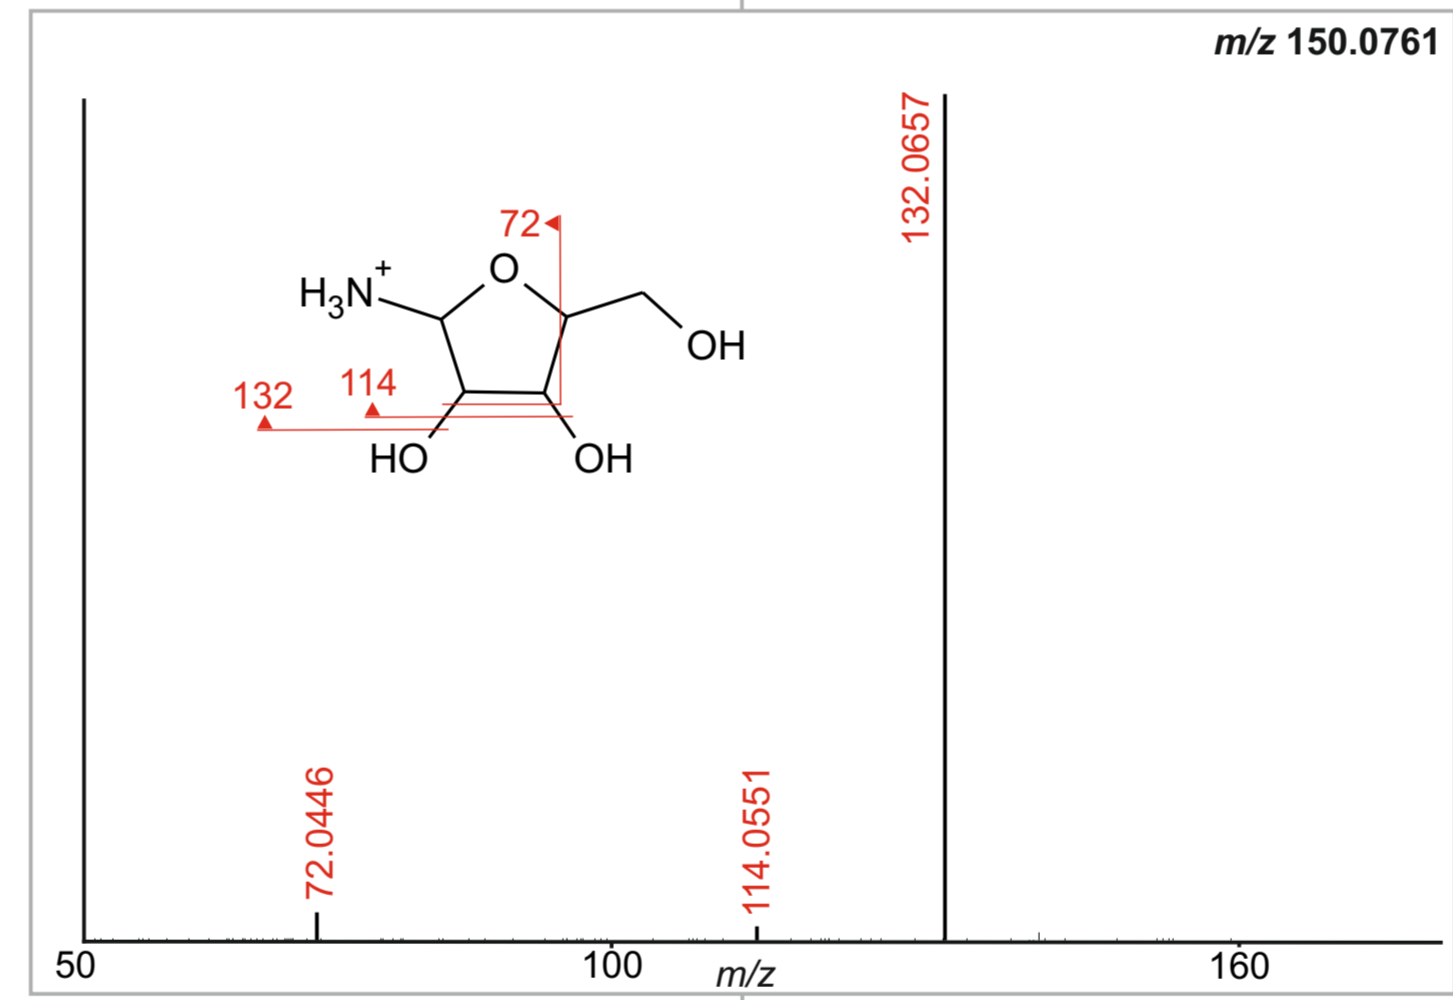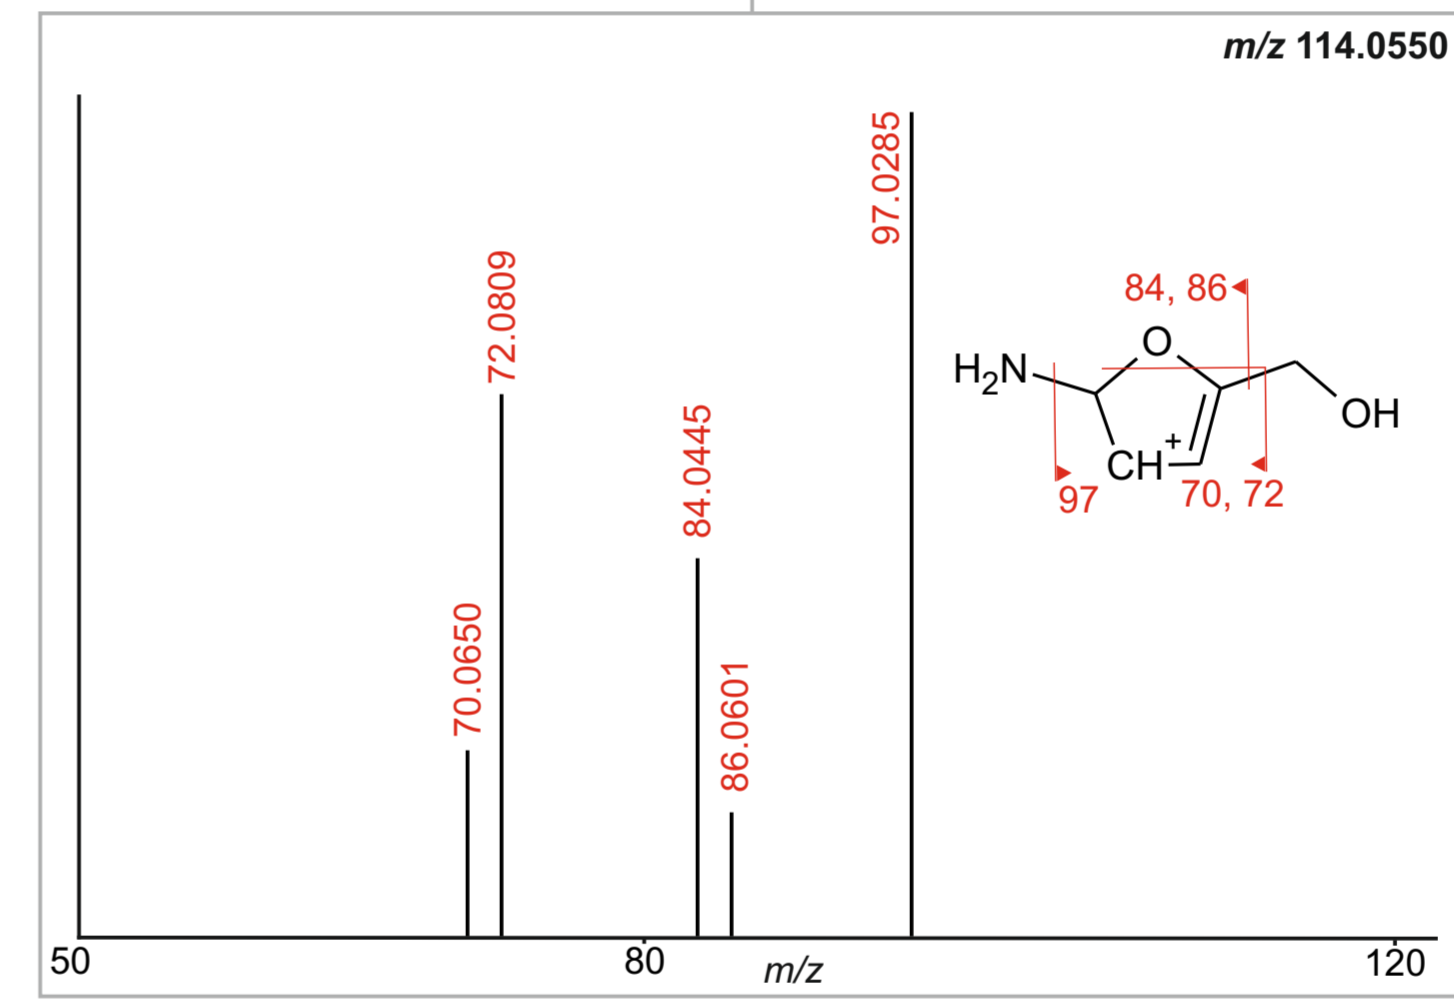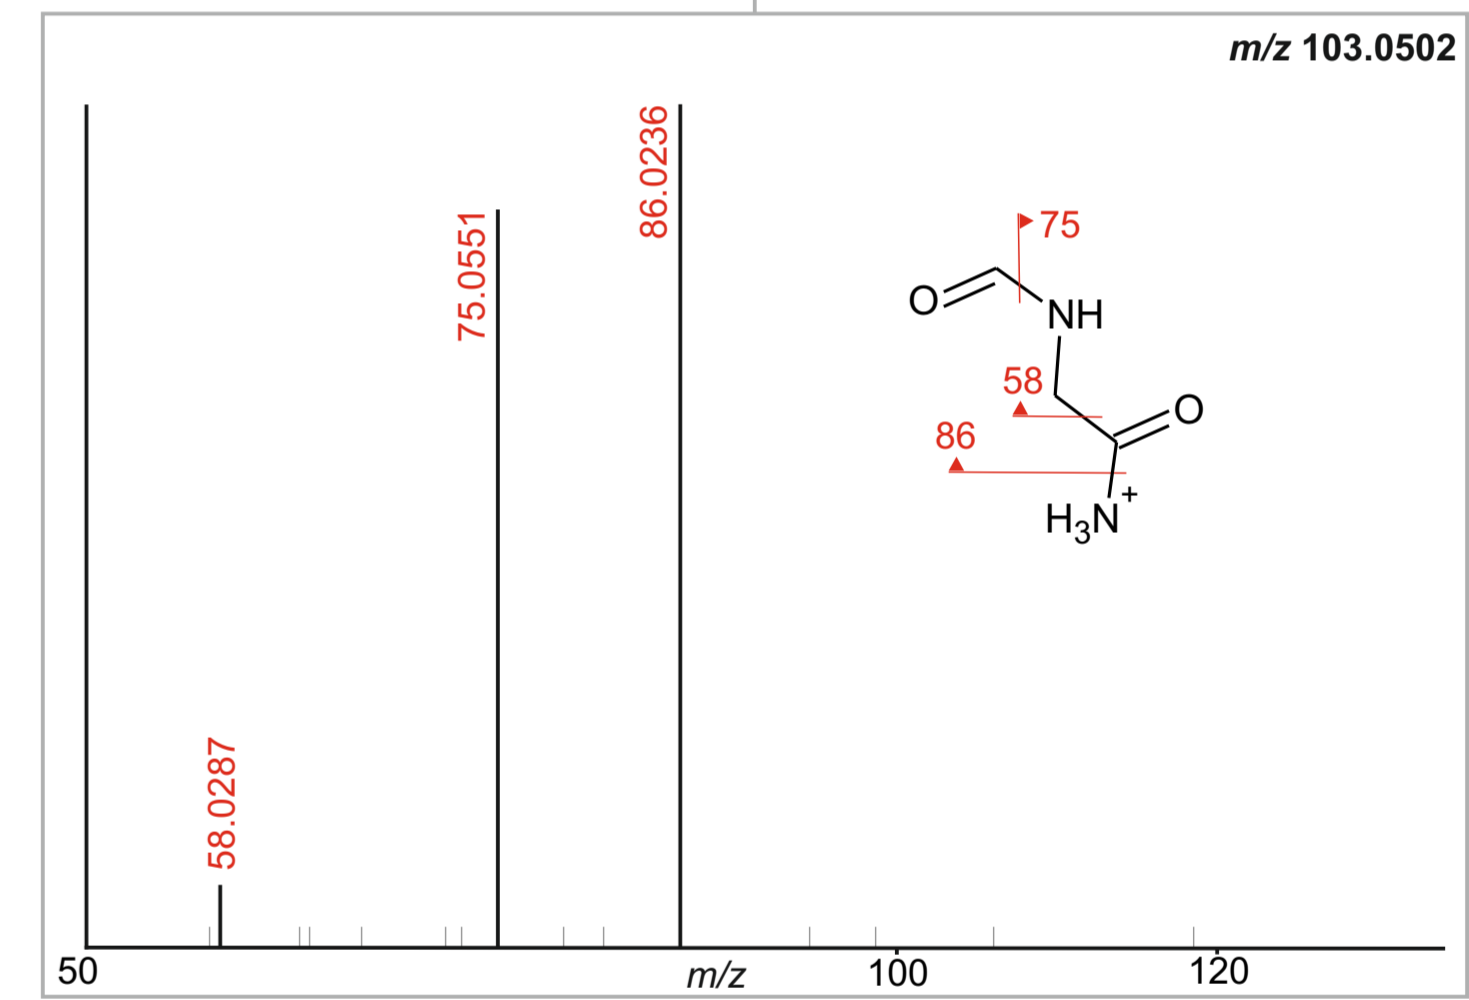

MS<sup>4</sup>

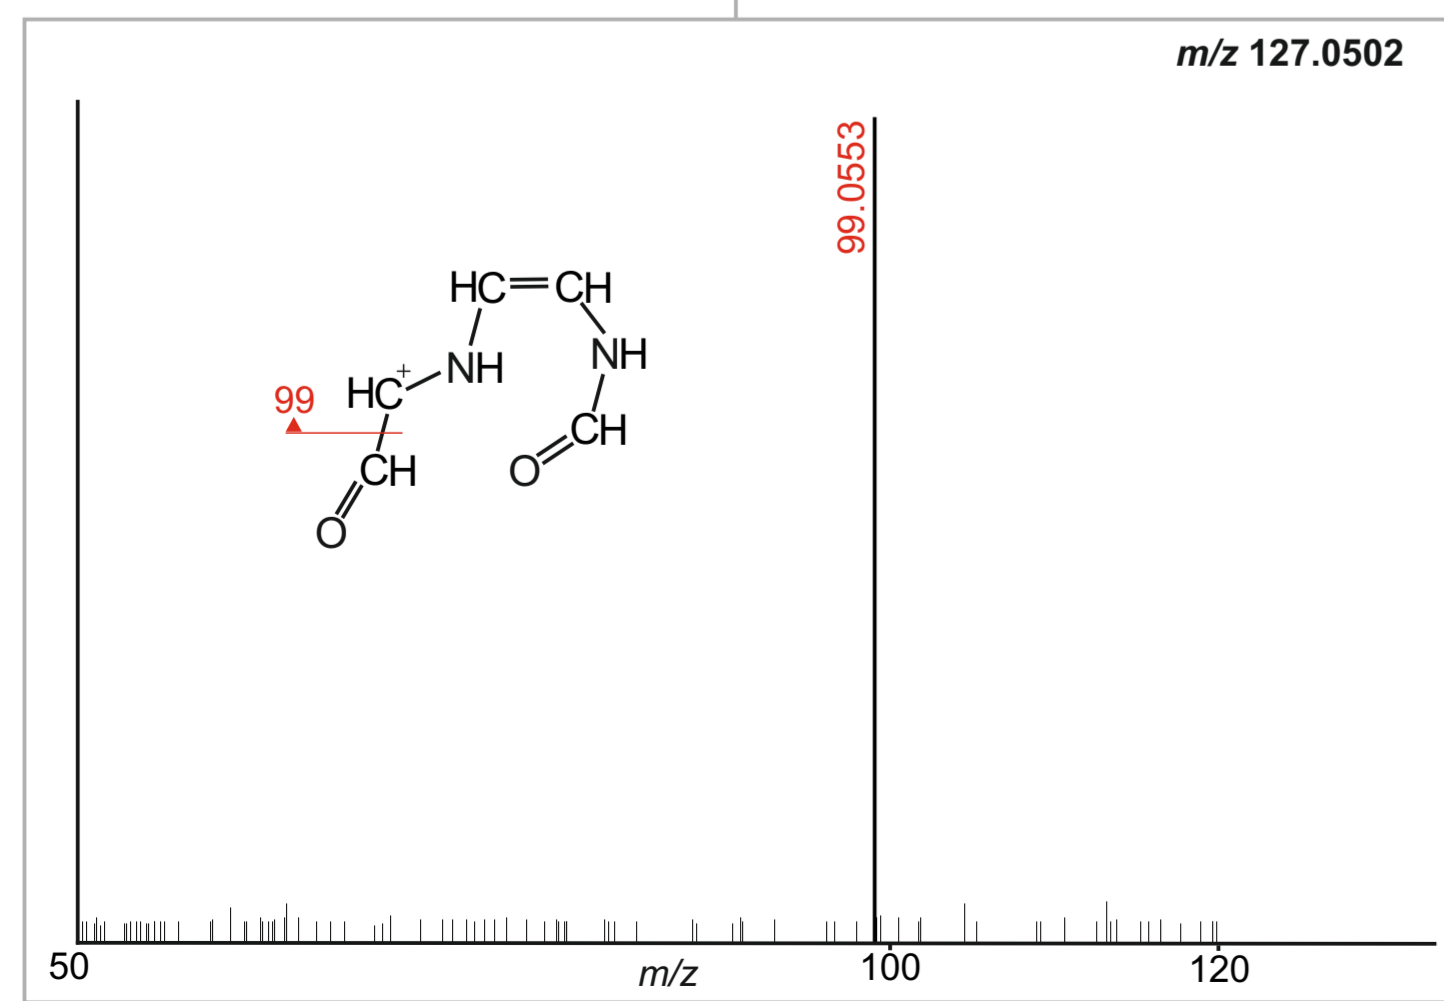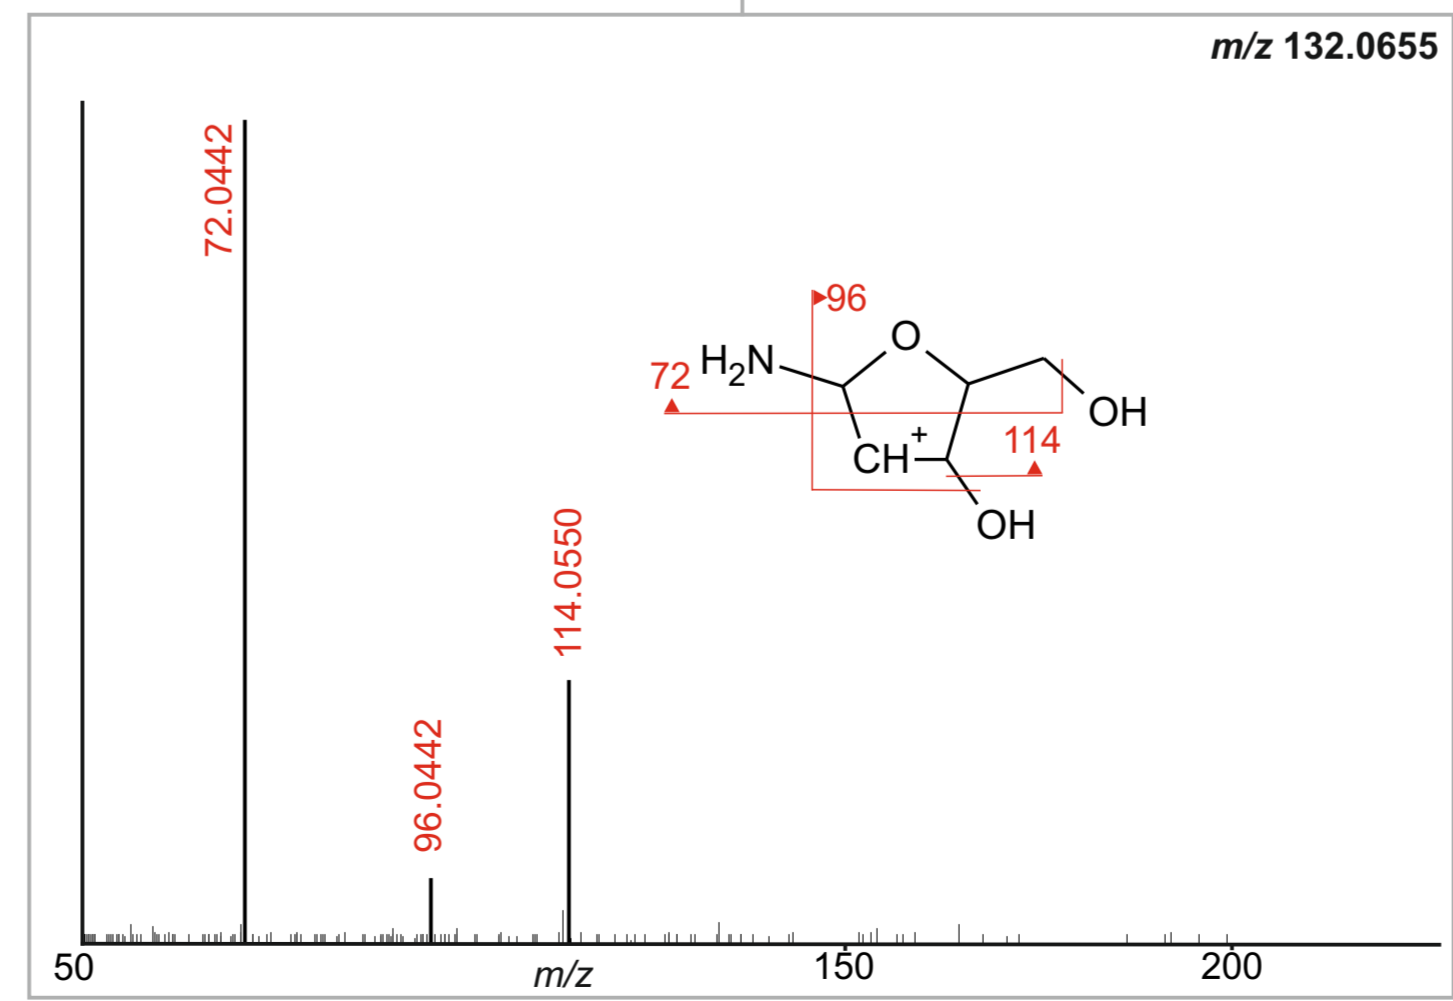

MS<sup>2</sup>

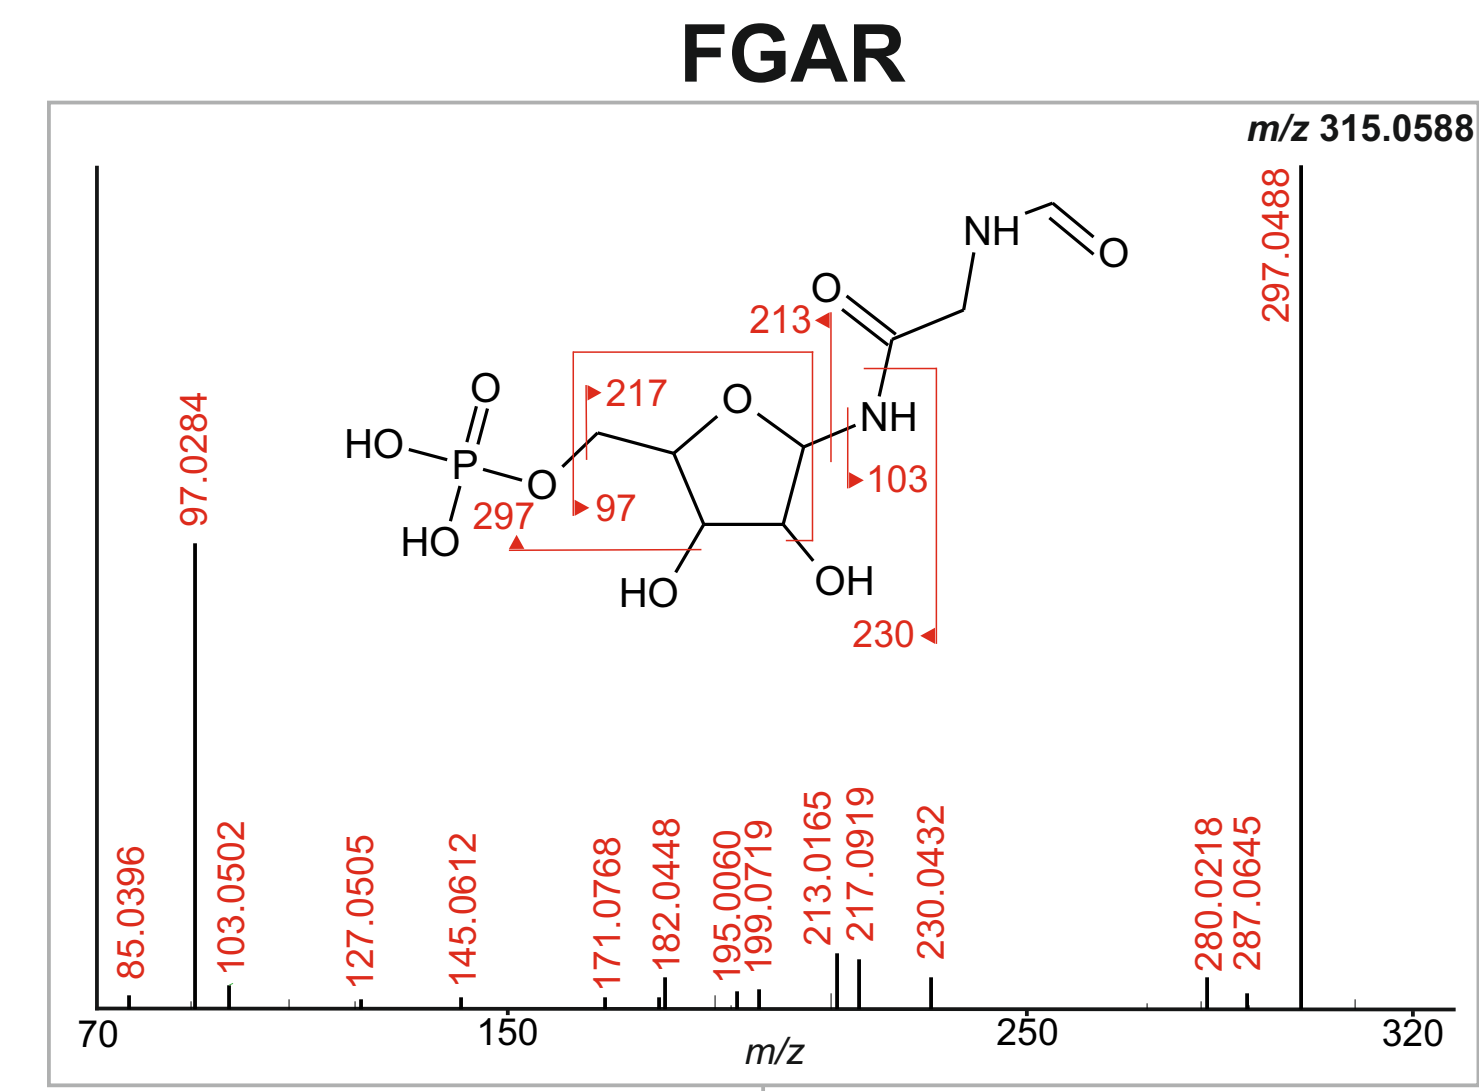

MS<sup>3</sup>

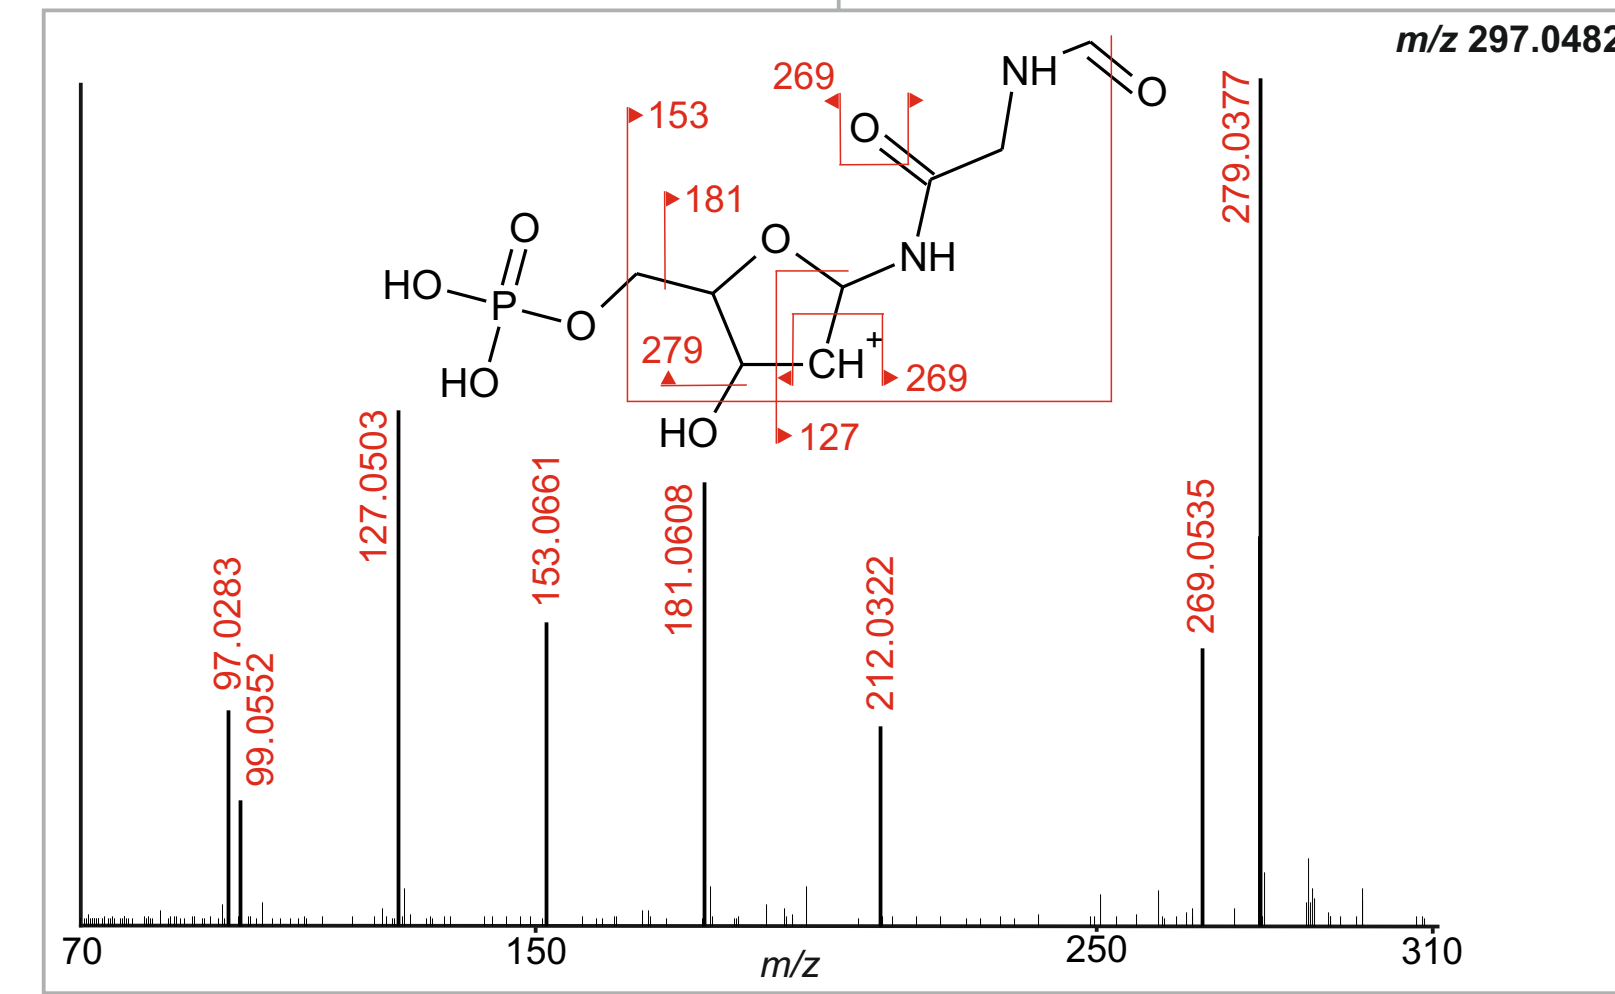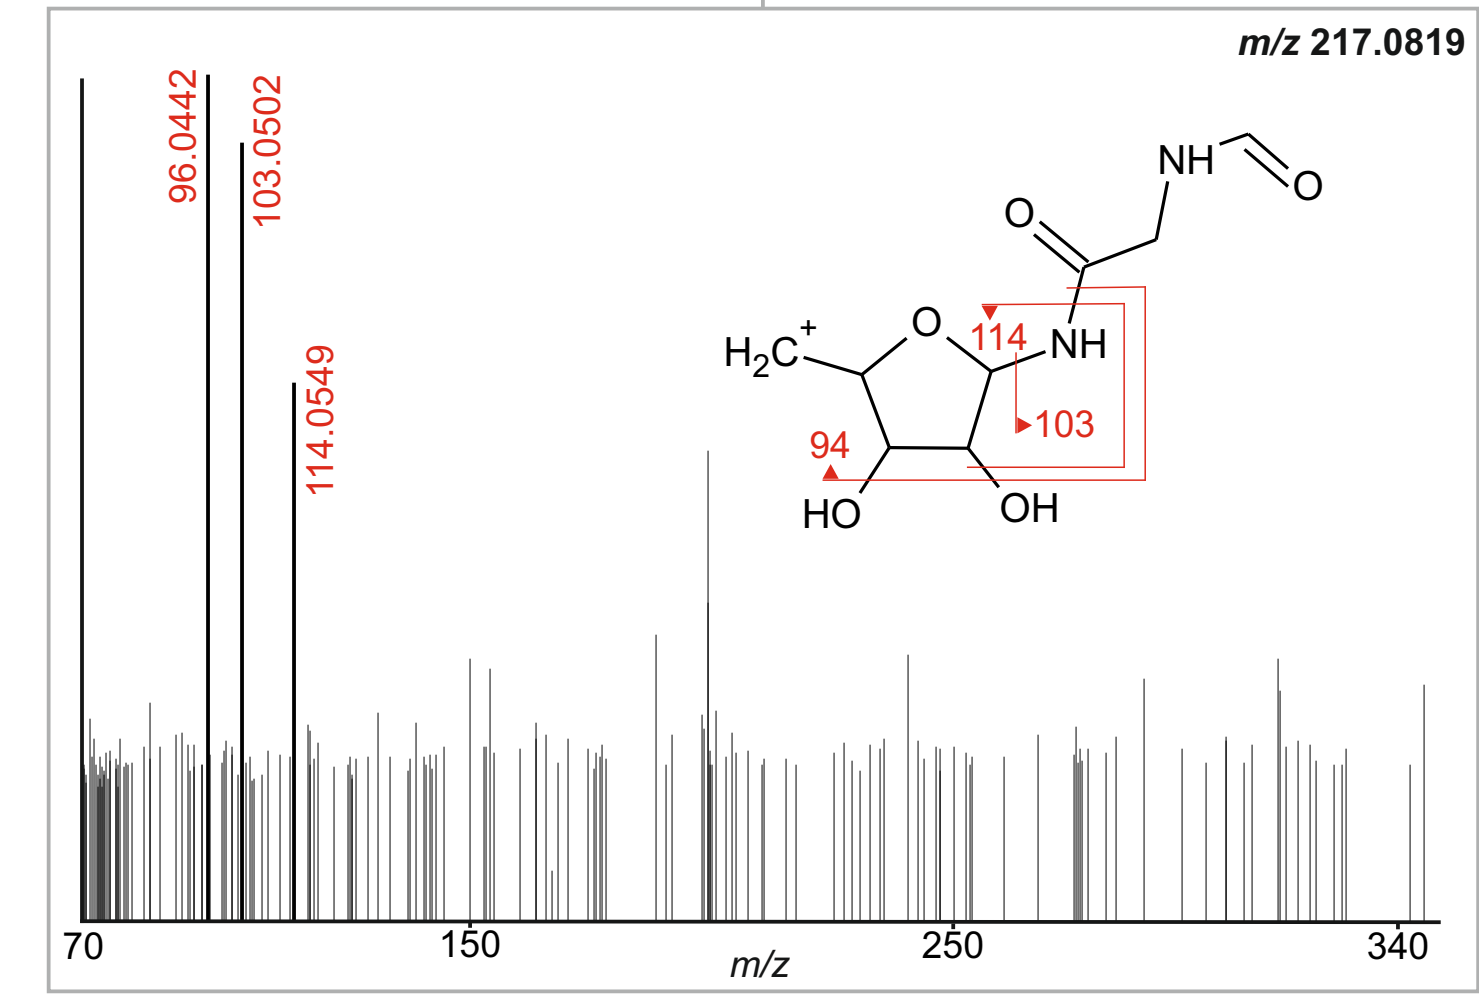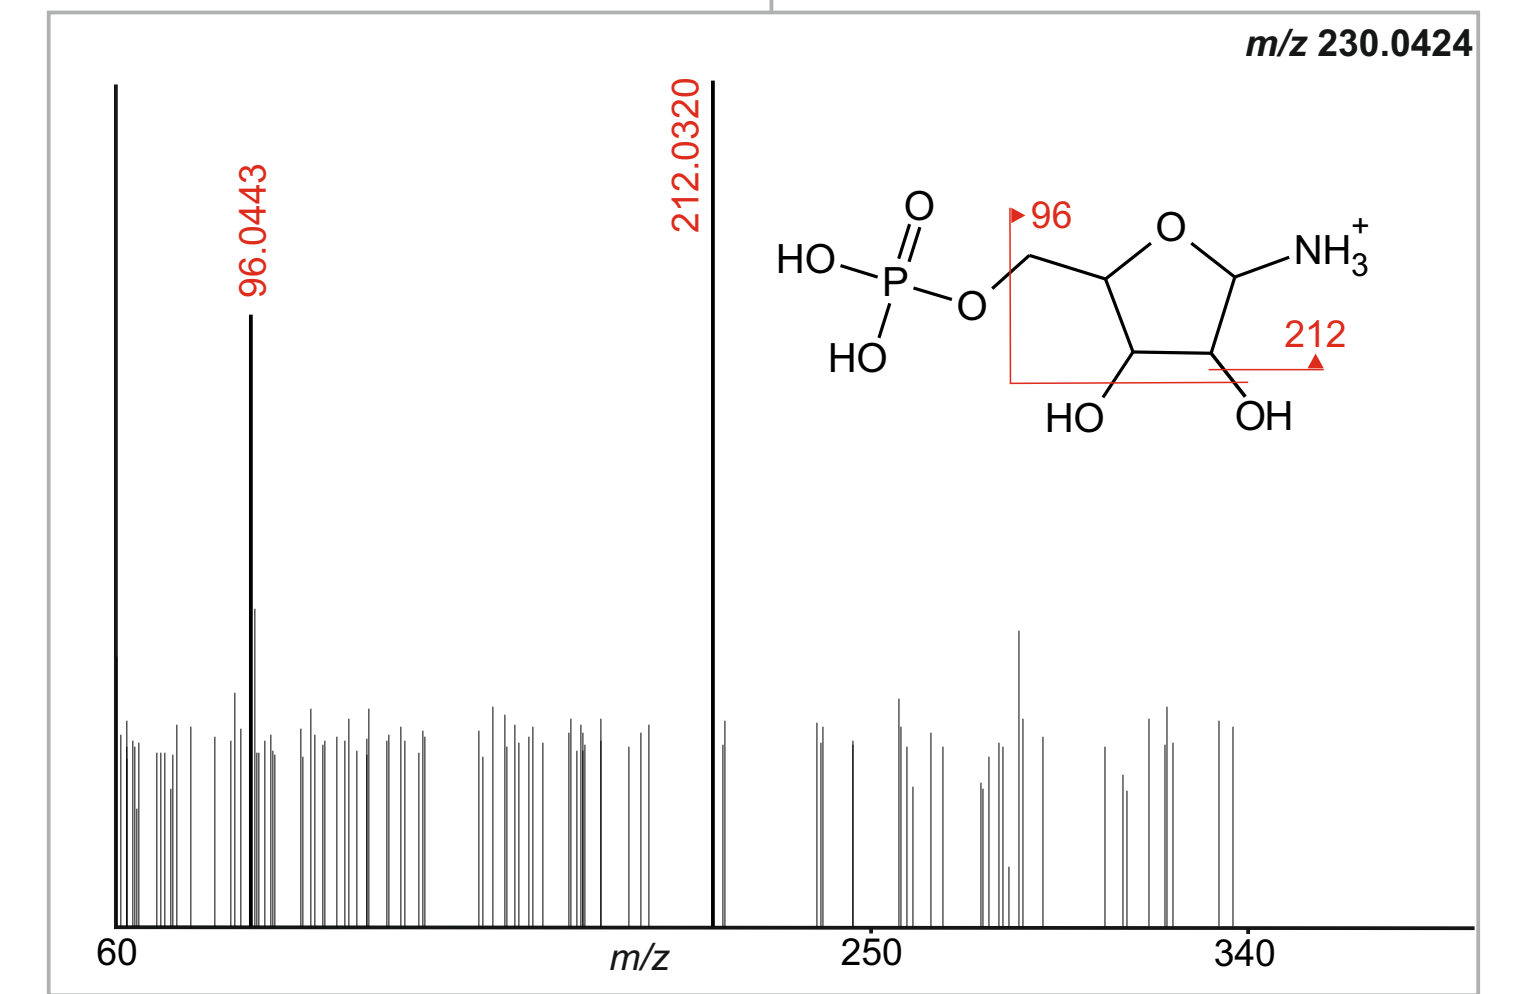

MS<sup>4</sup>

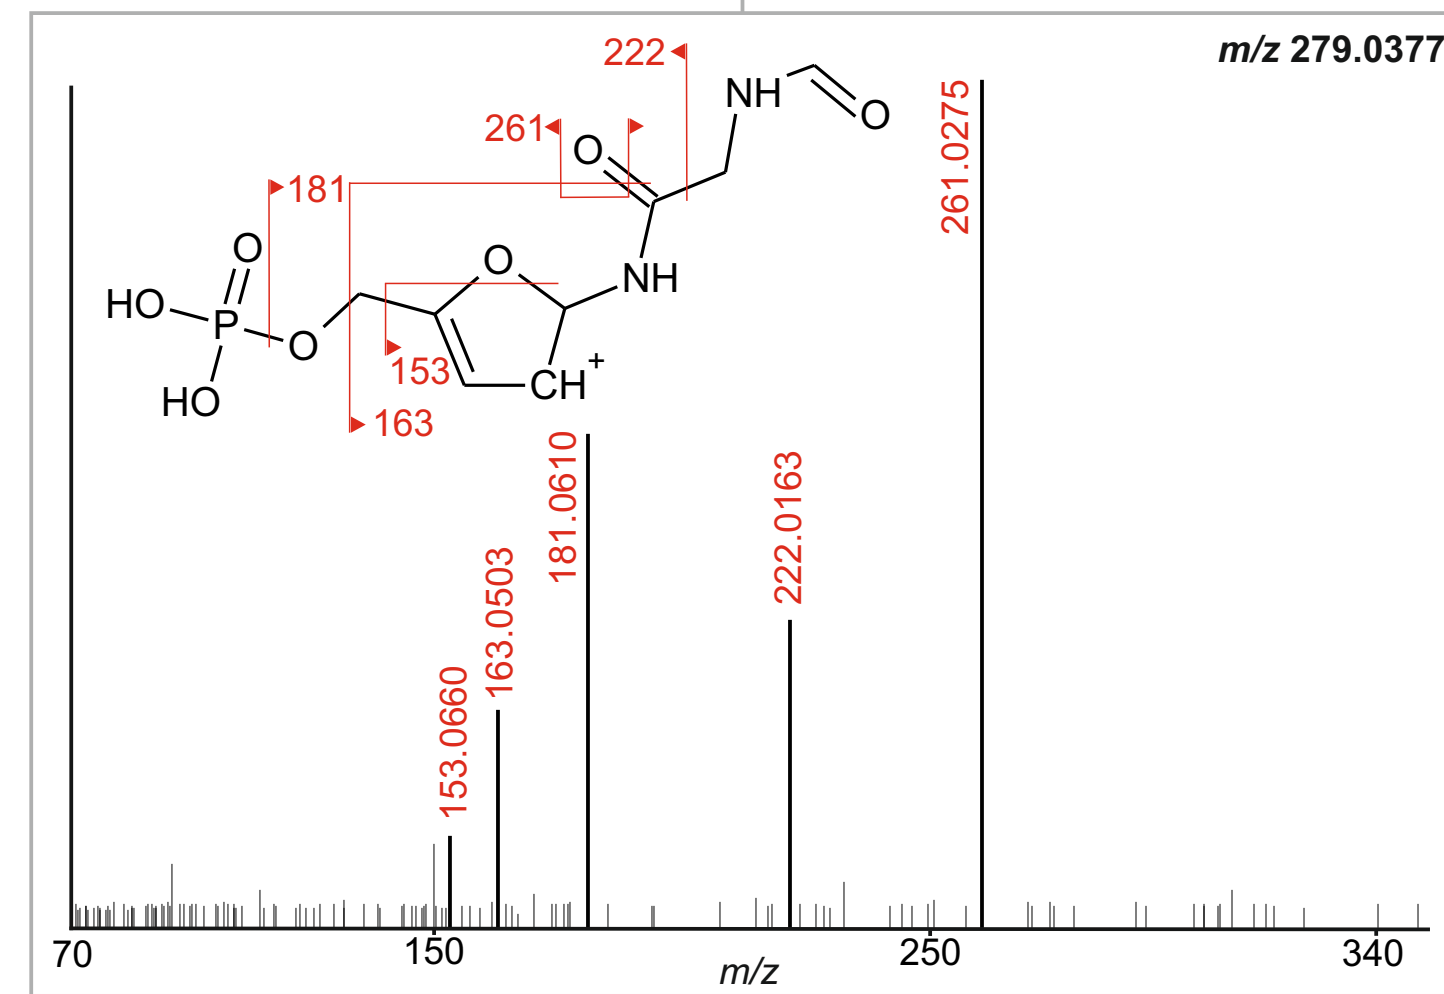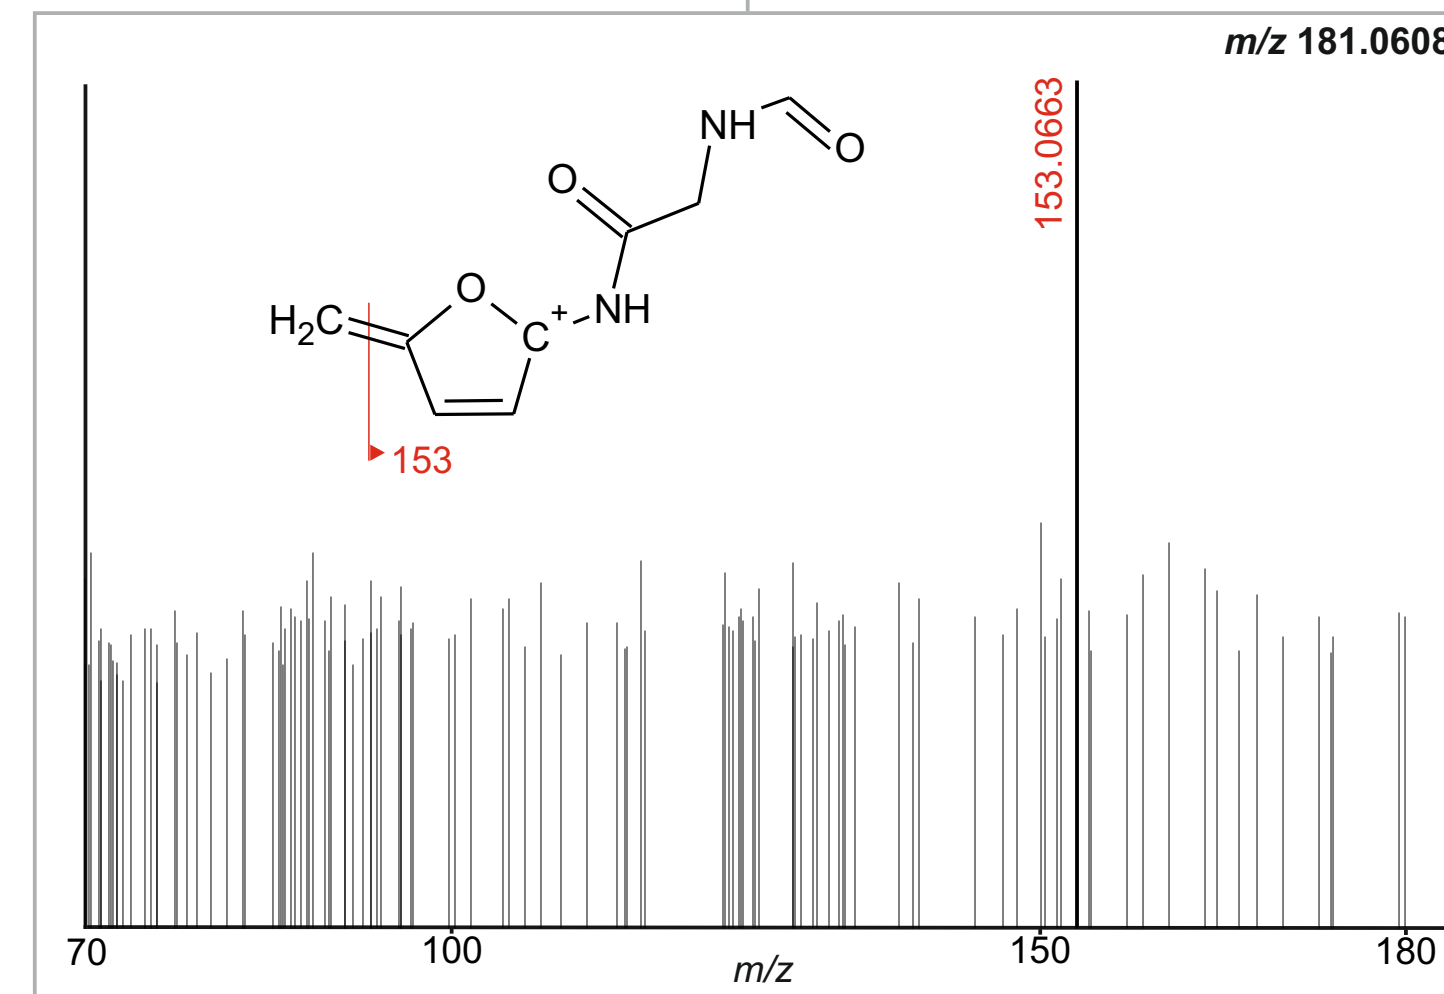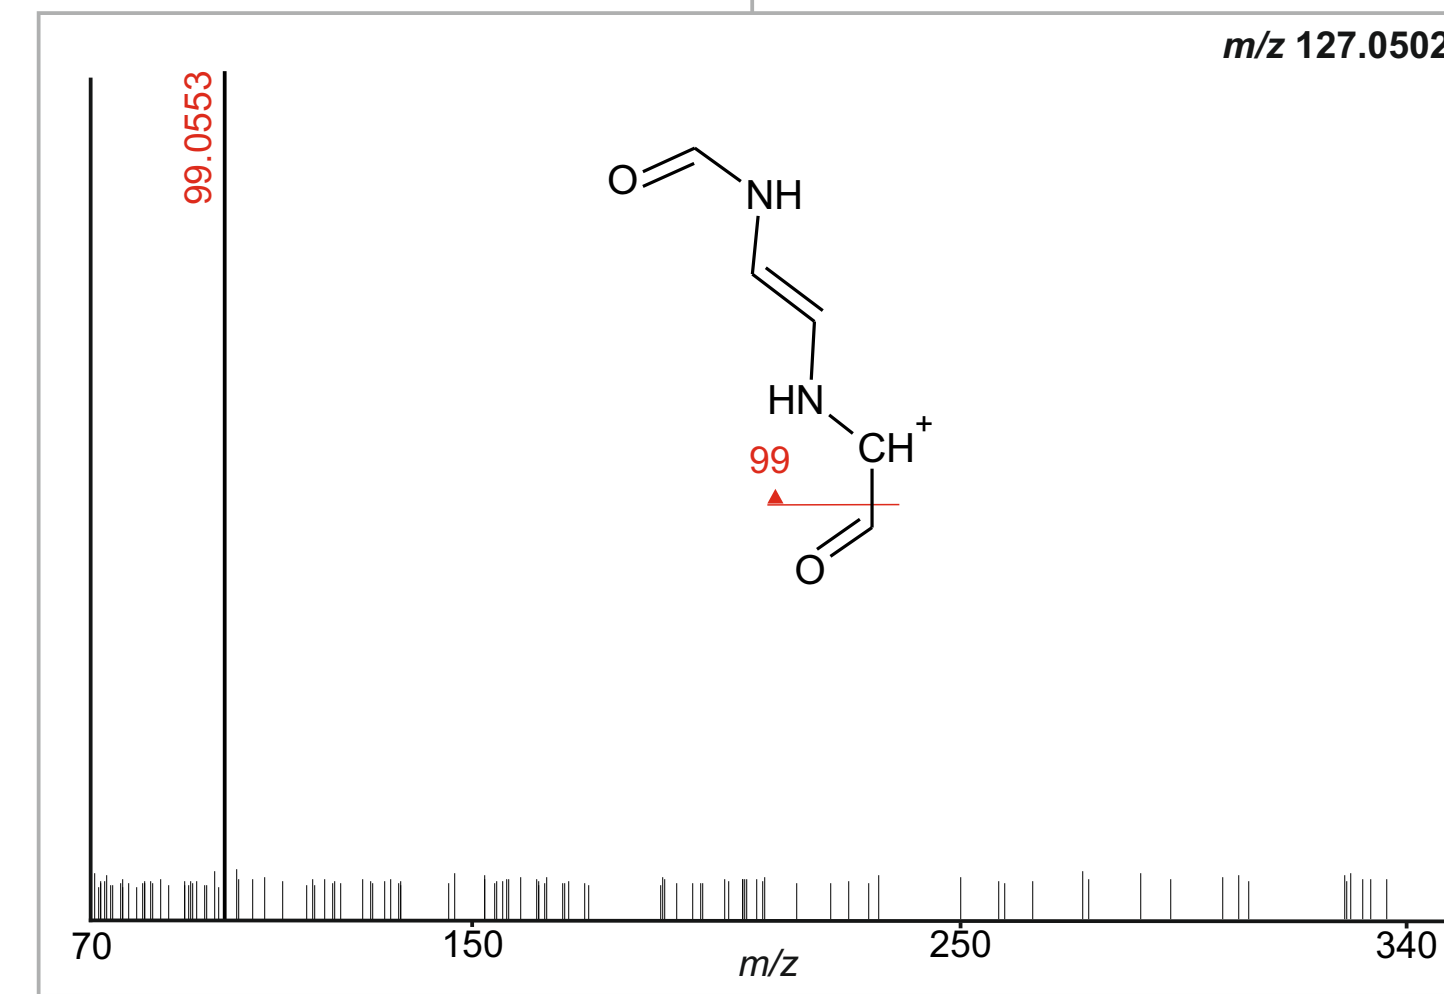

MS<sup>2</sup>

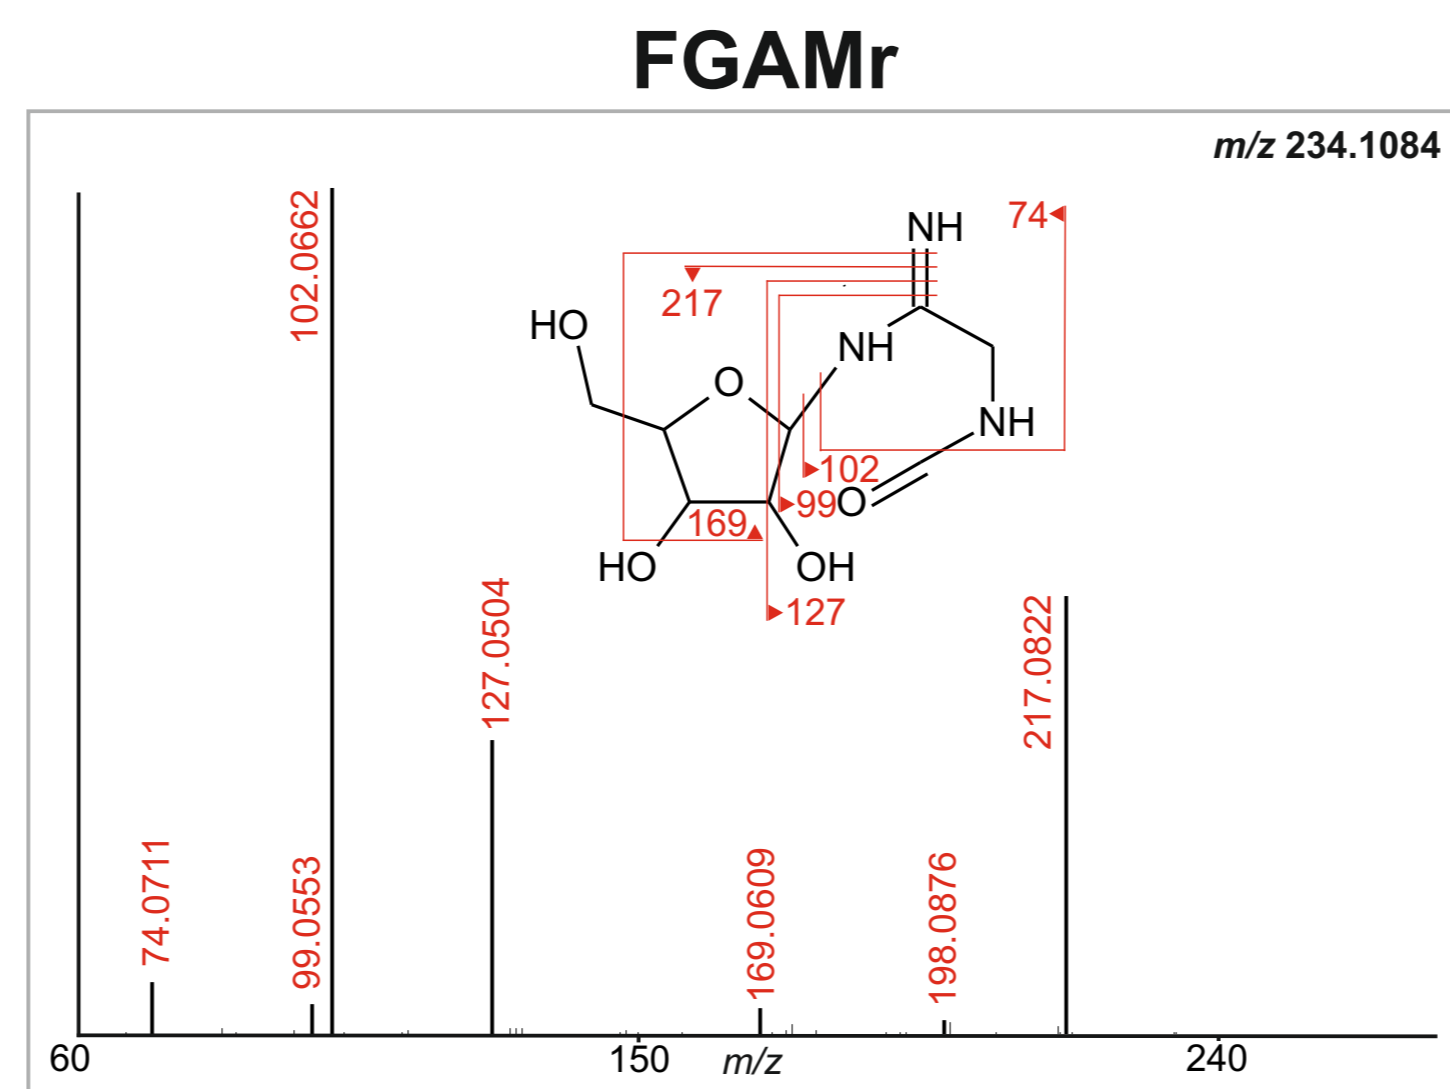

MS<sup>3</sup>

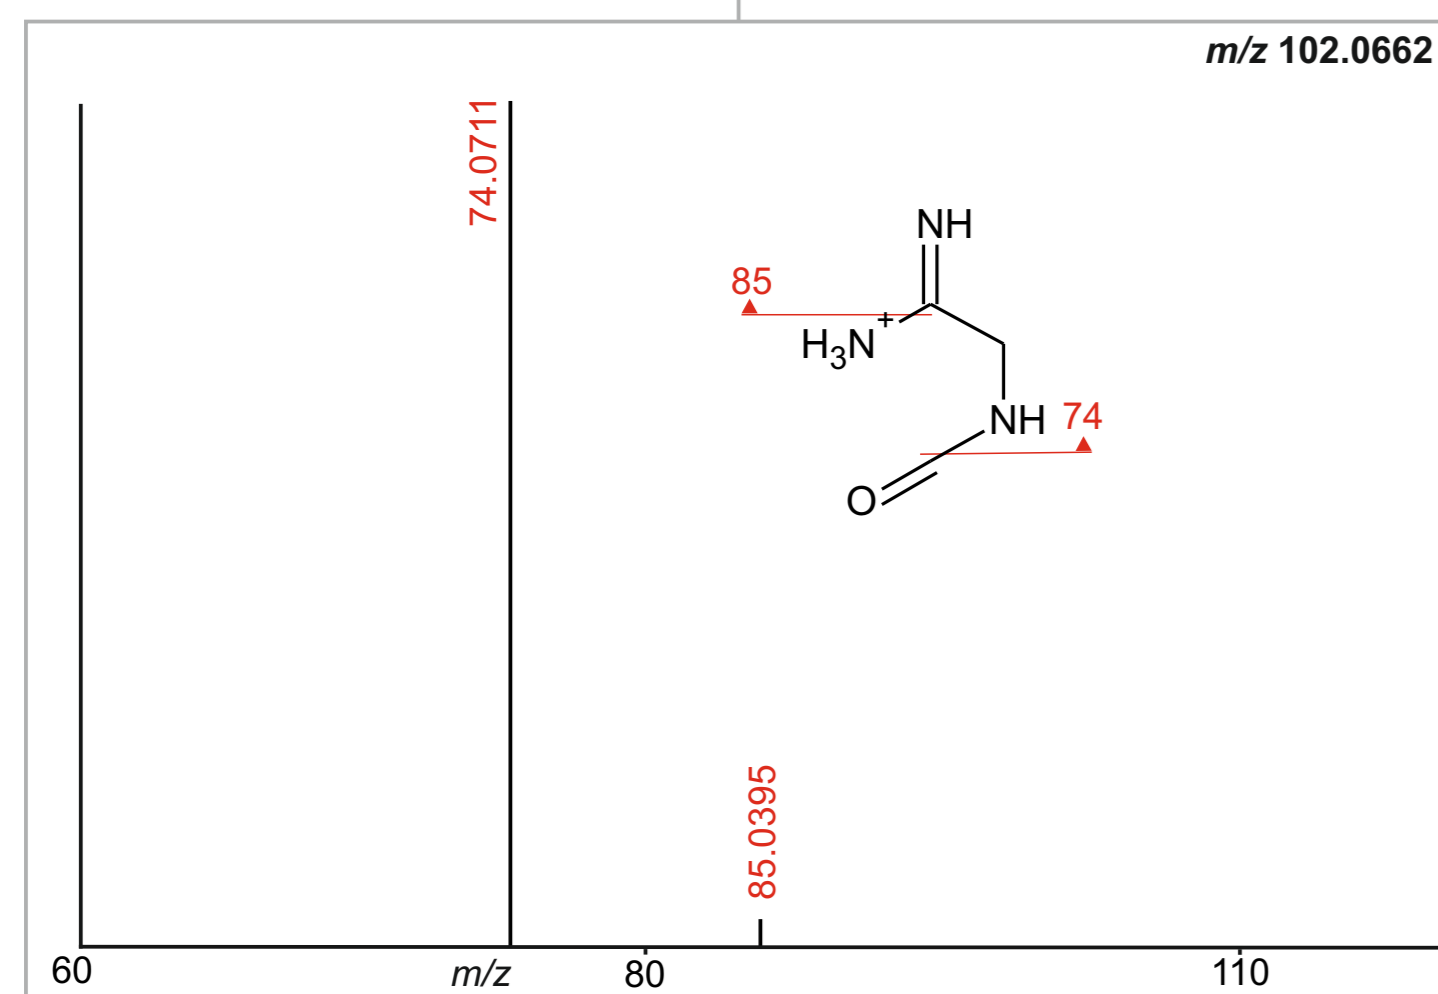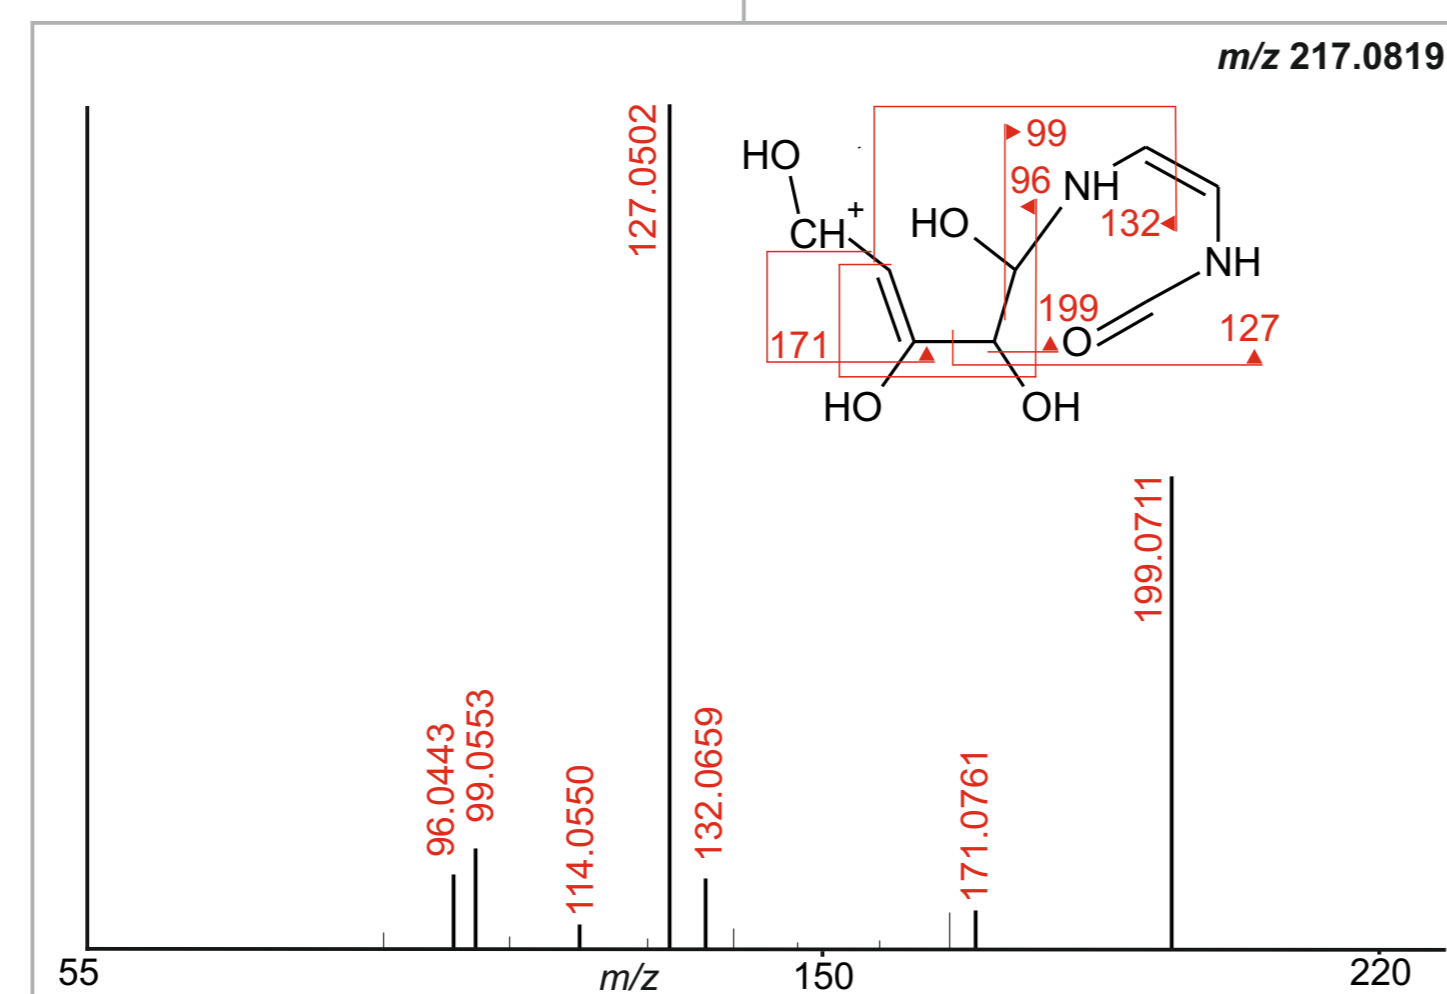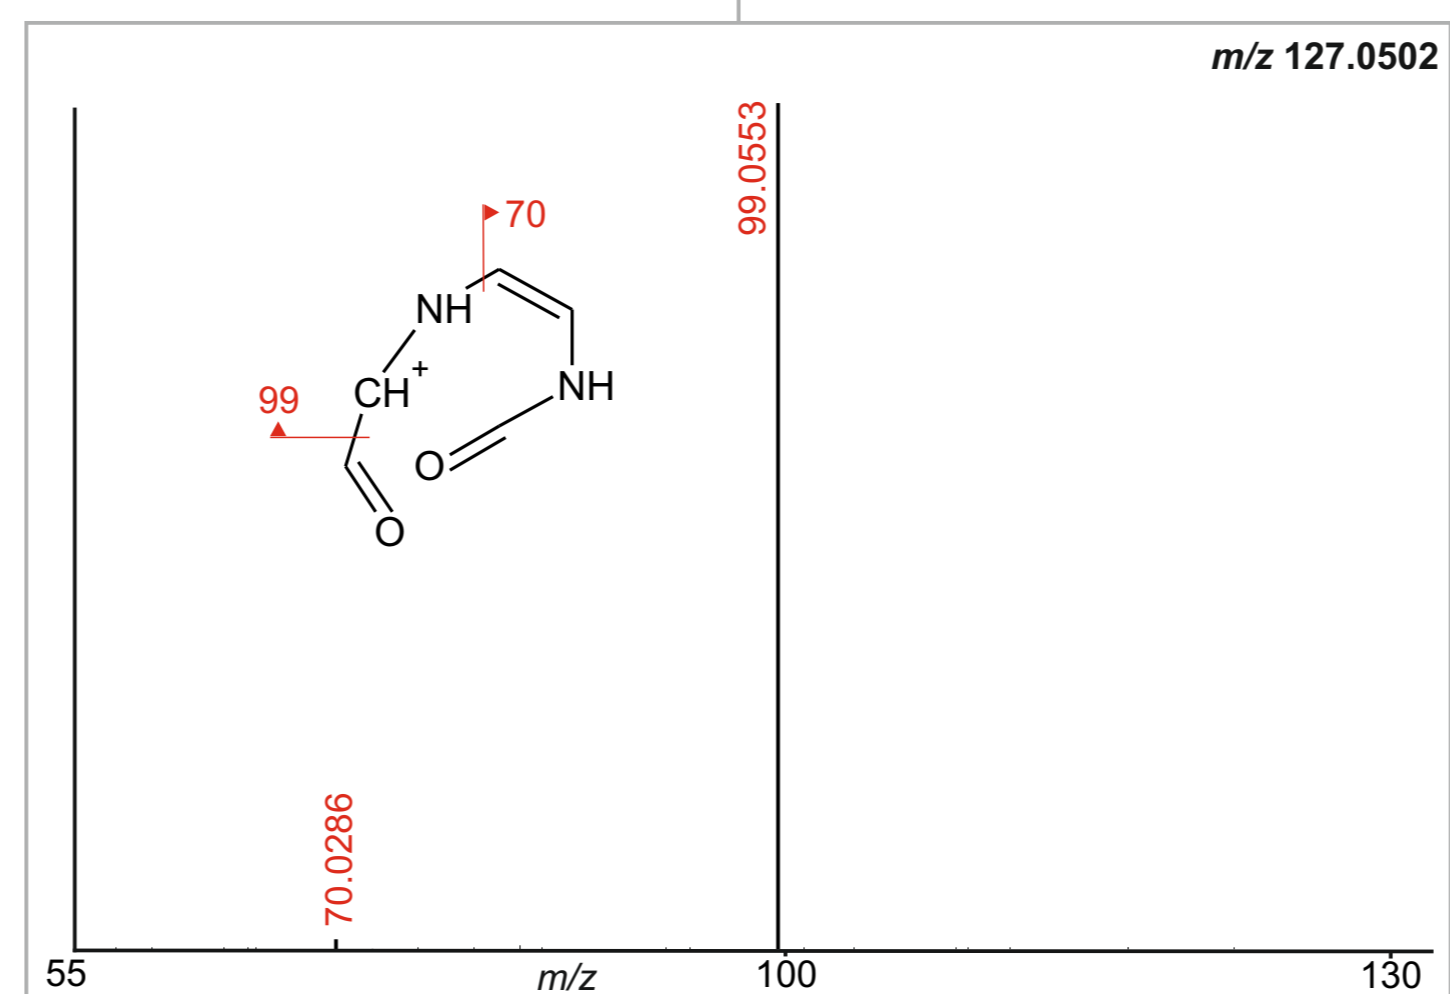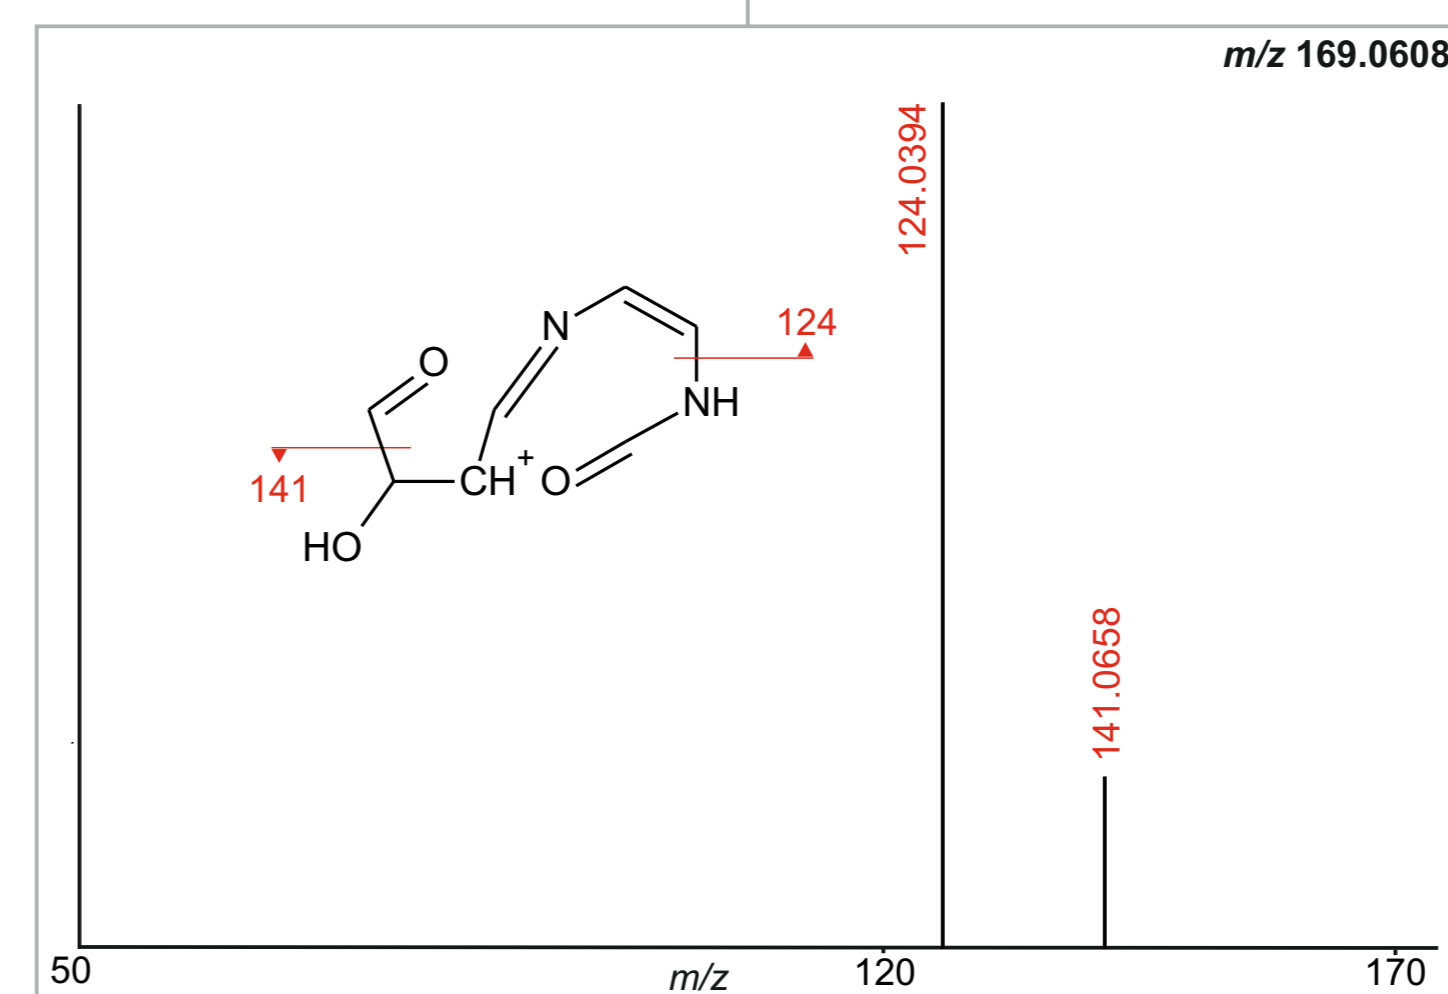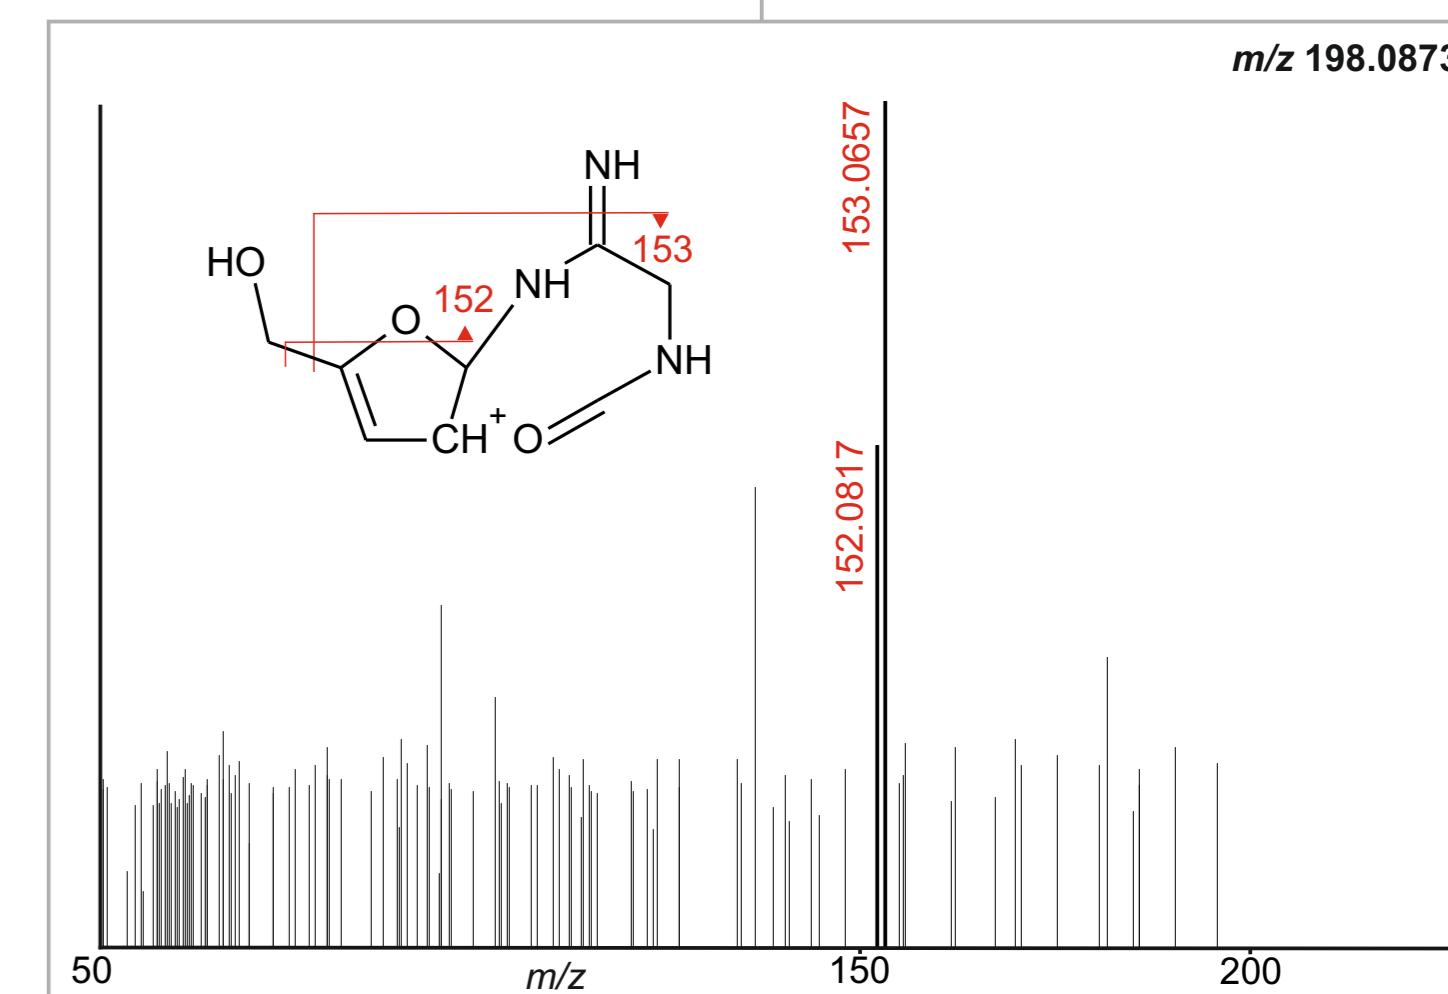

MS<sup>4</sup>

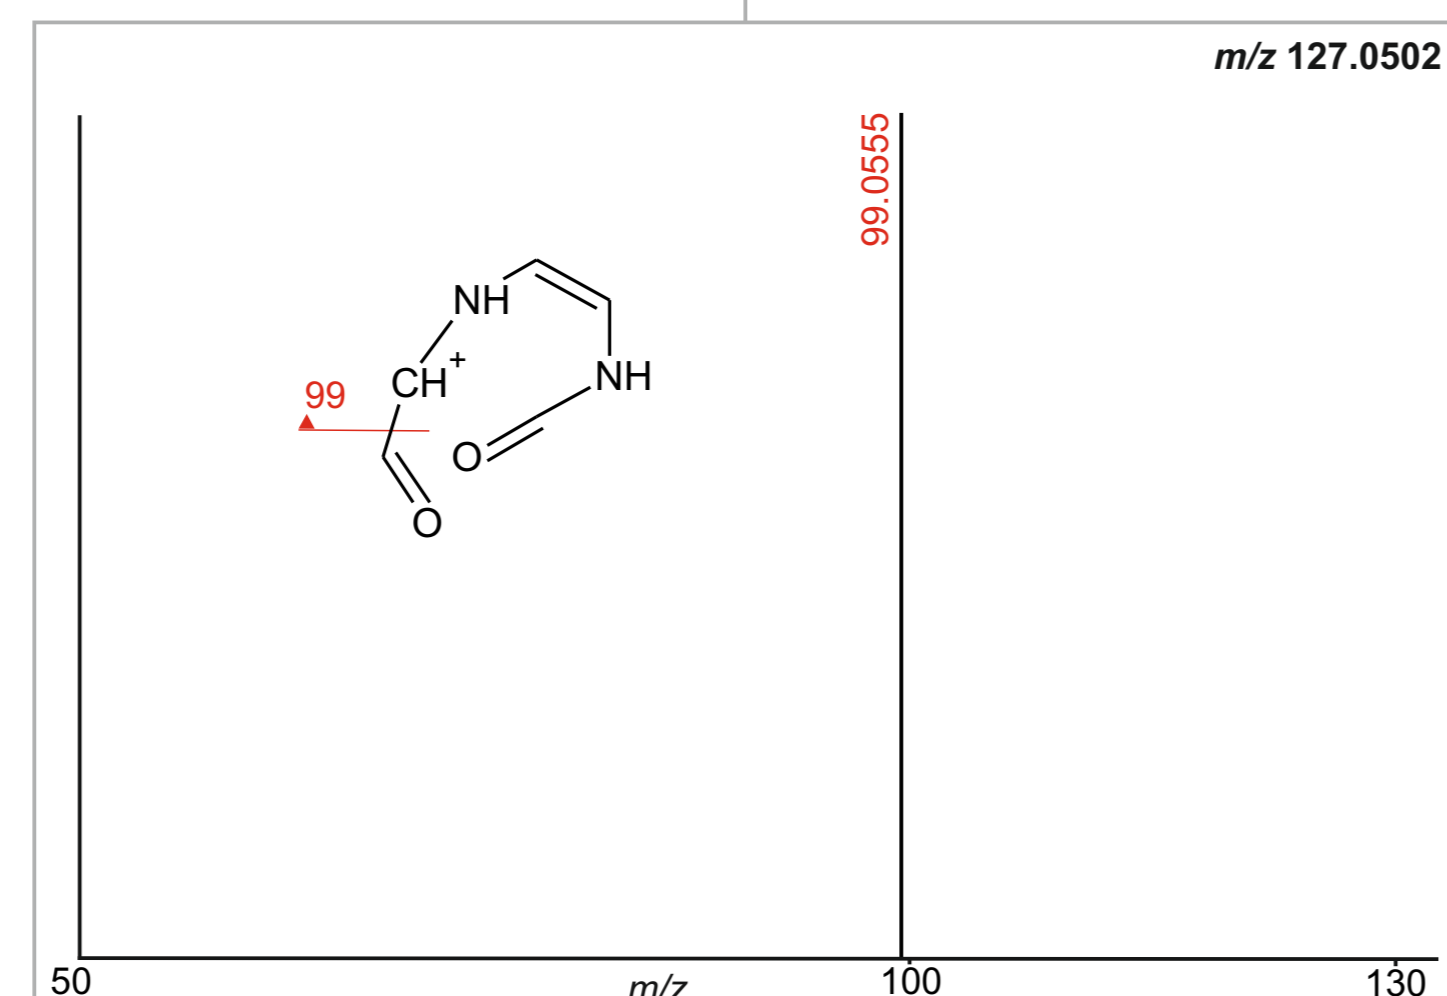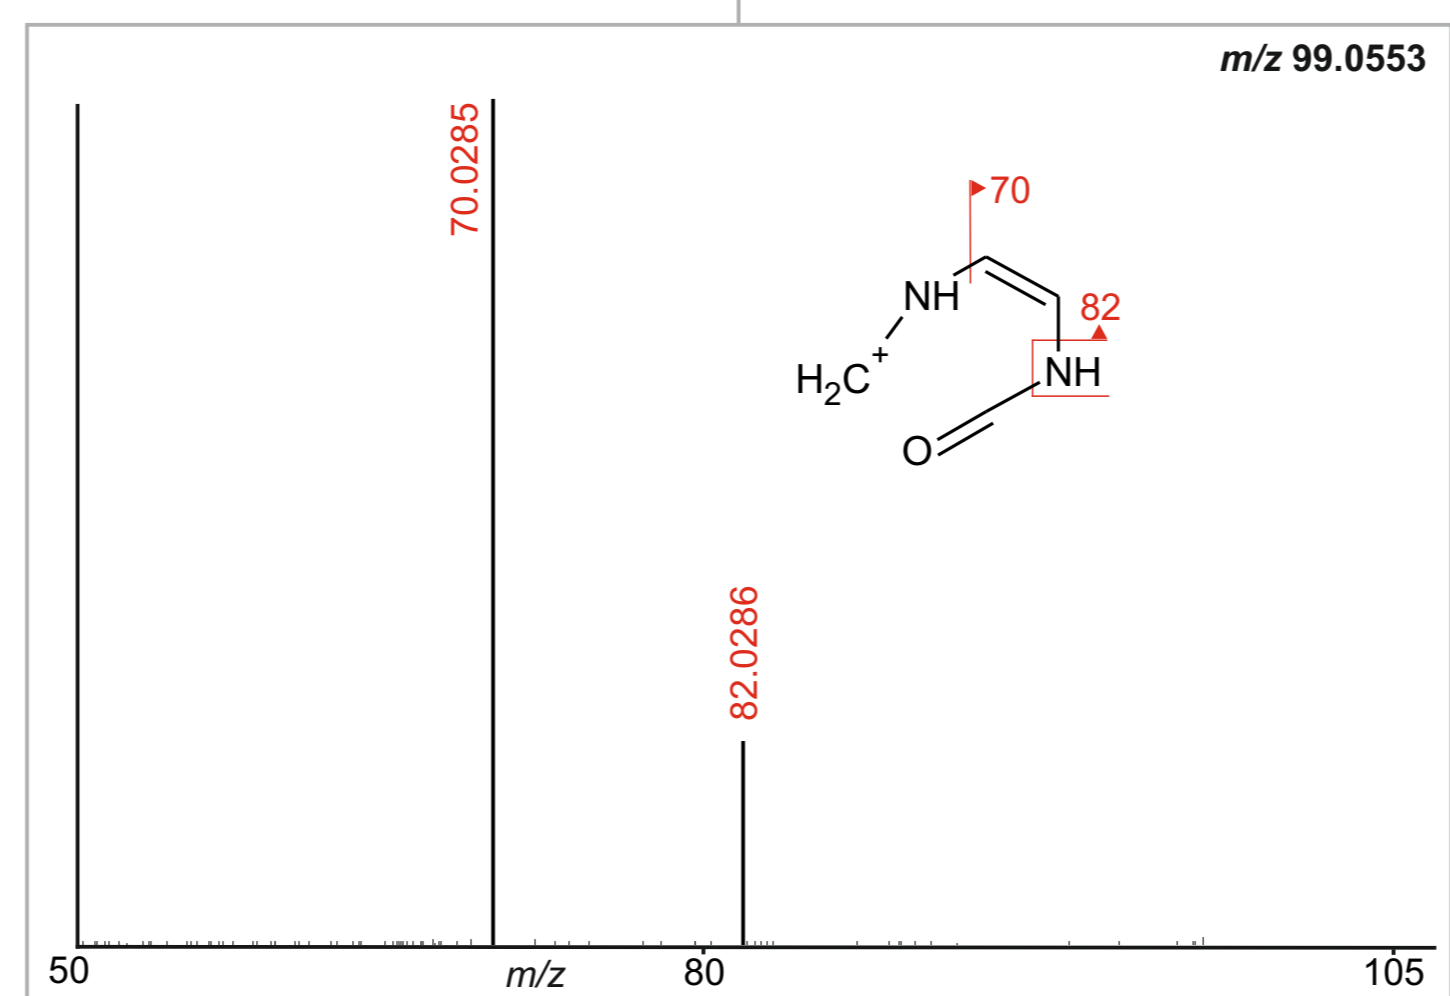

# FGAMR

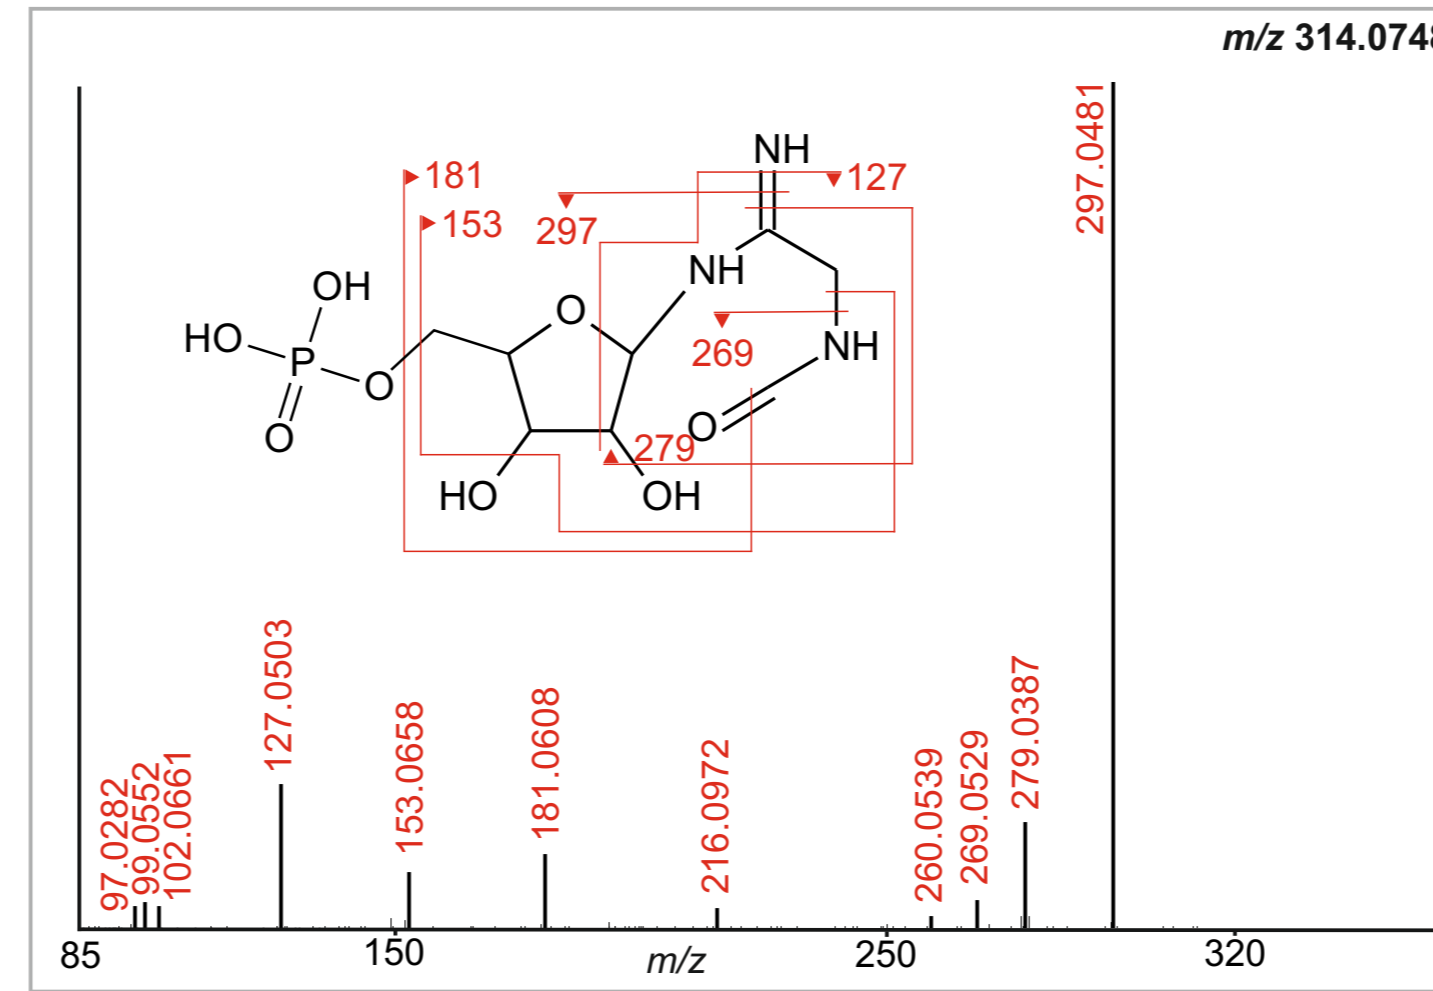

MS<sup>2</sup>

MS<sup>3</sup>

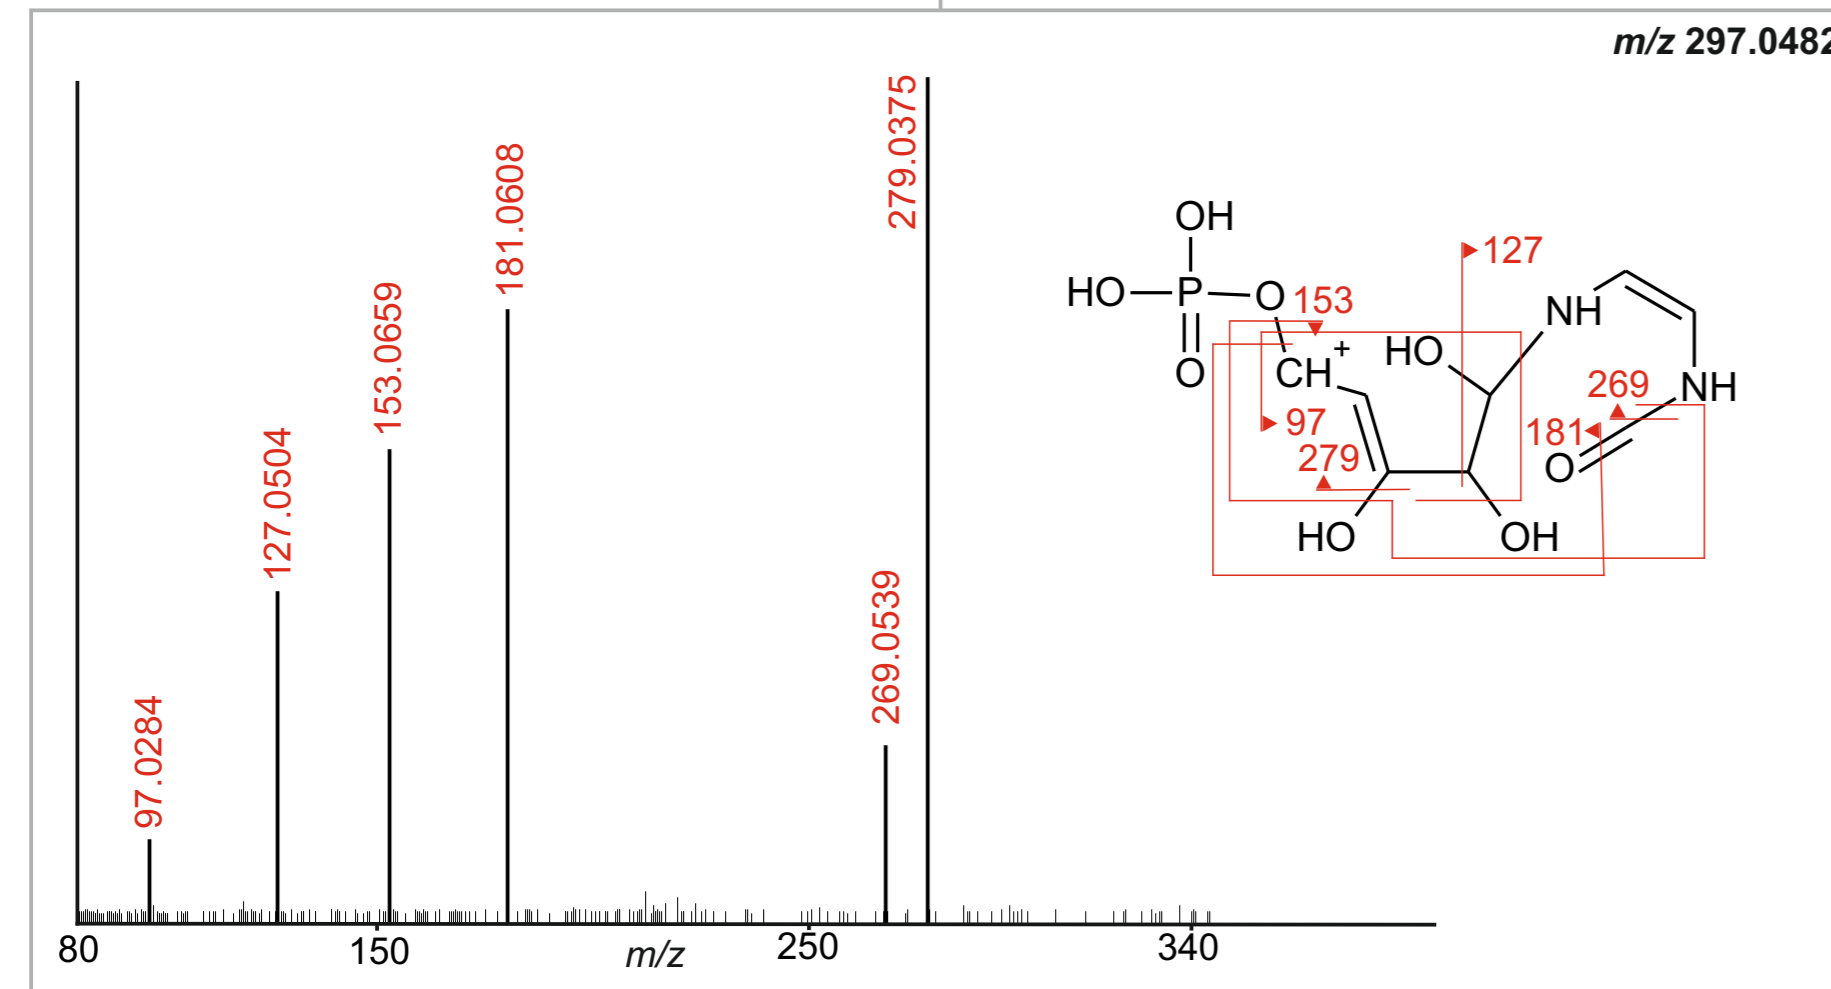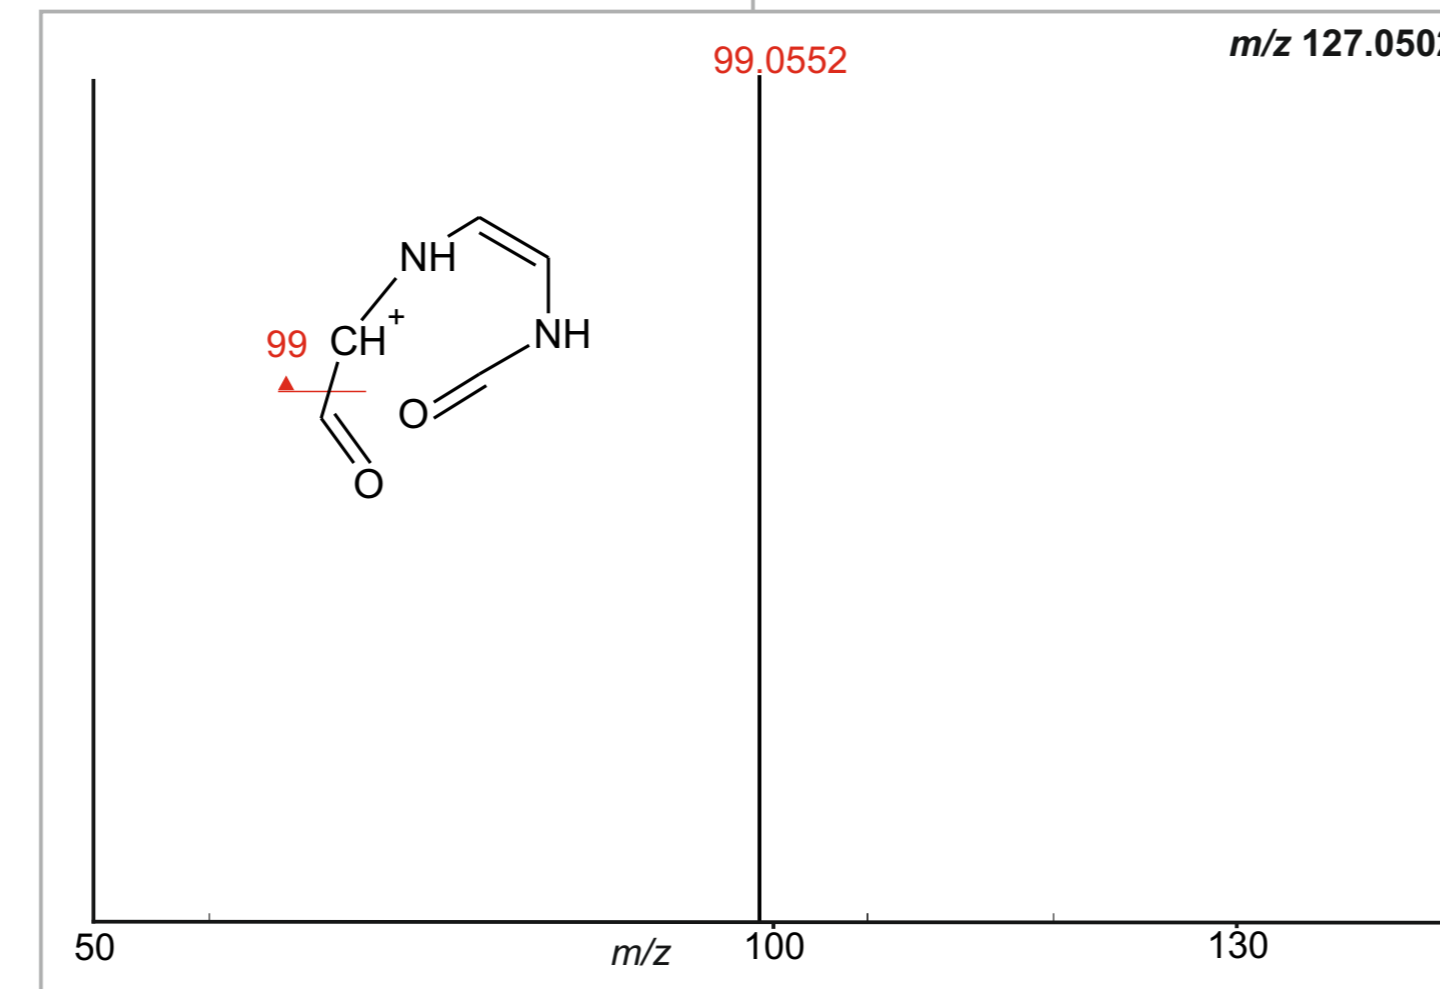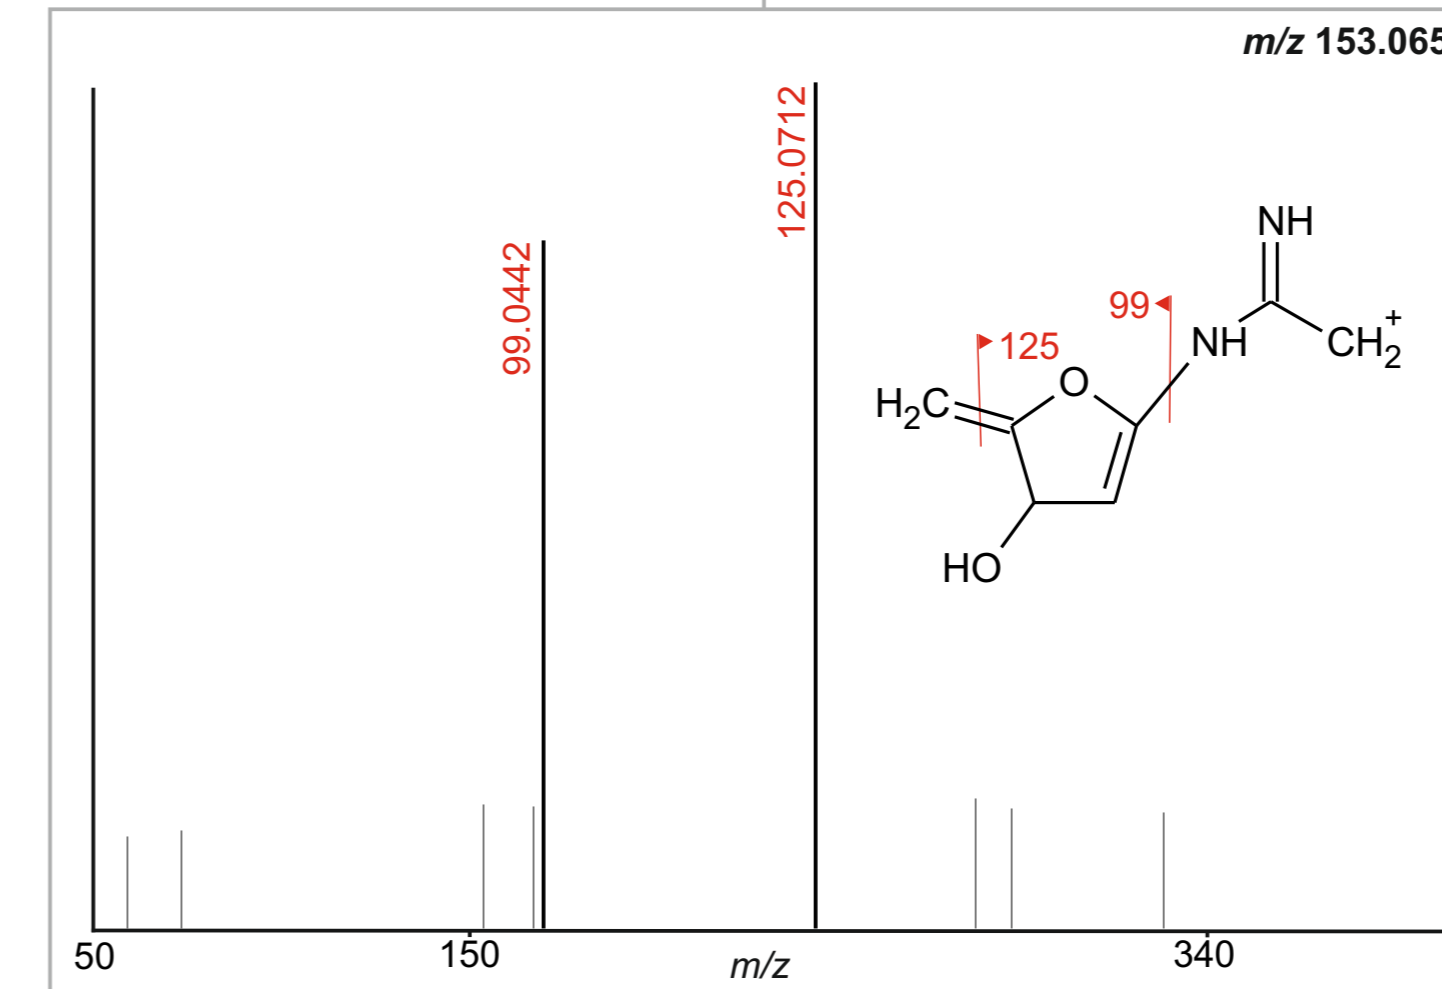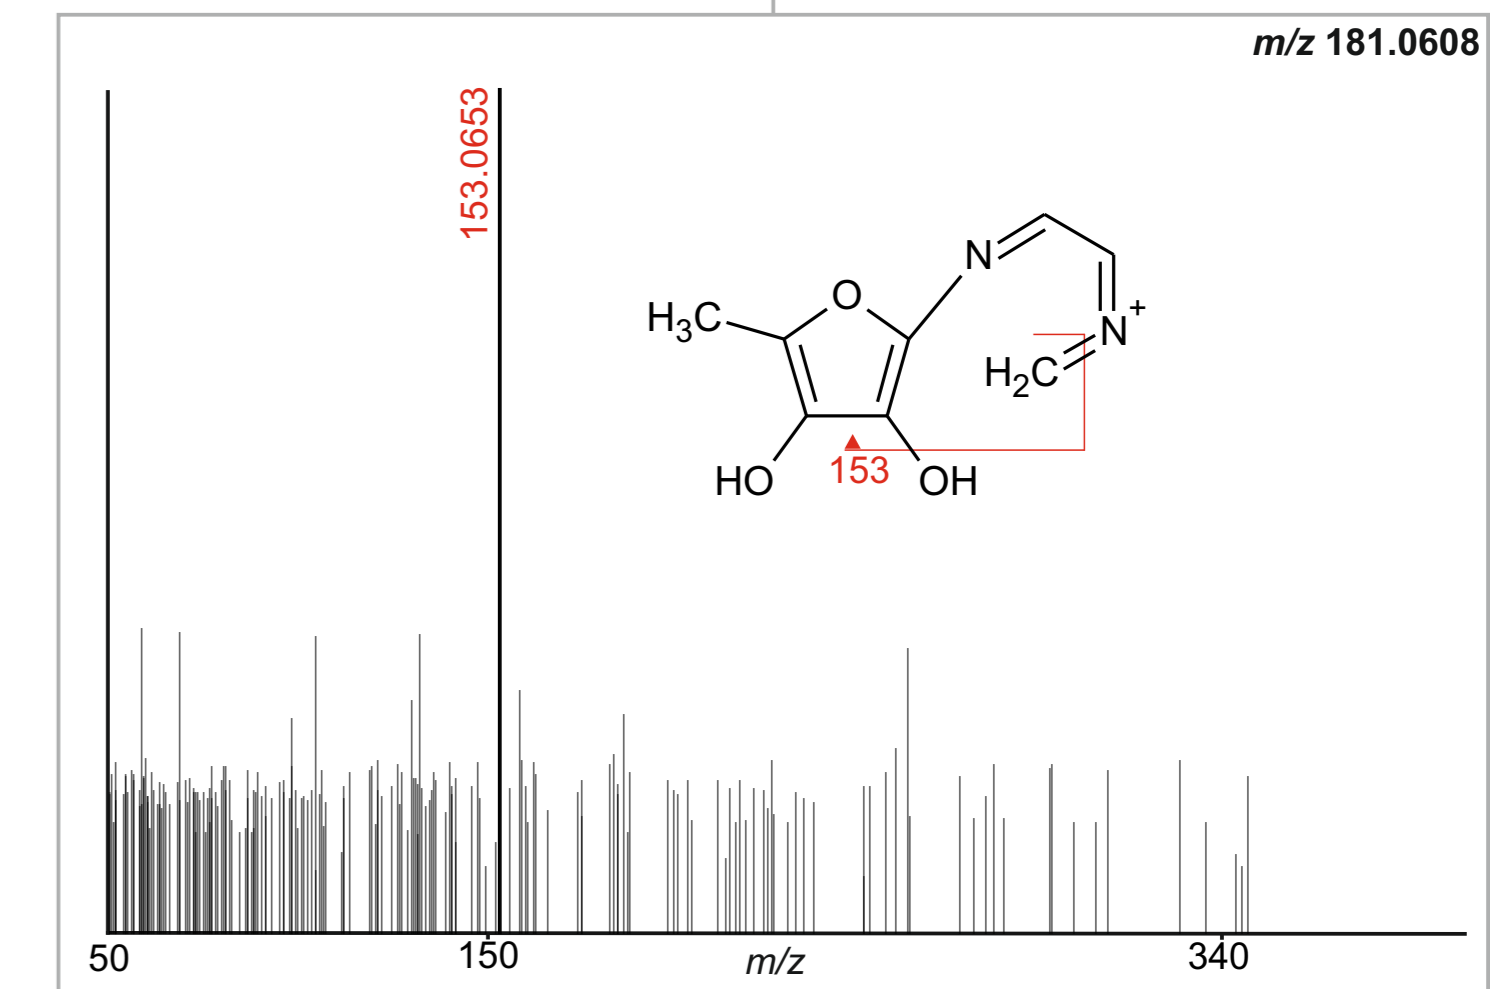

# Alr

MS<sup>2</sup>

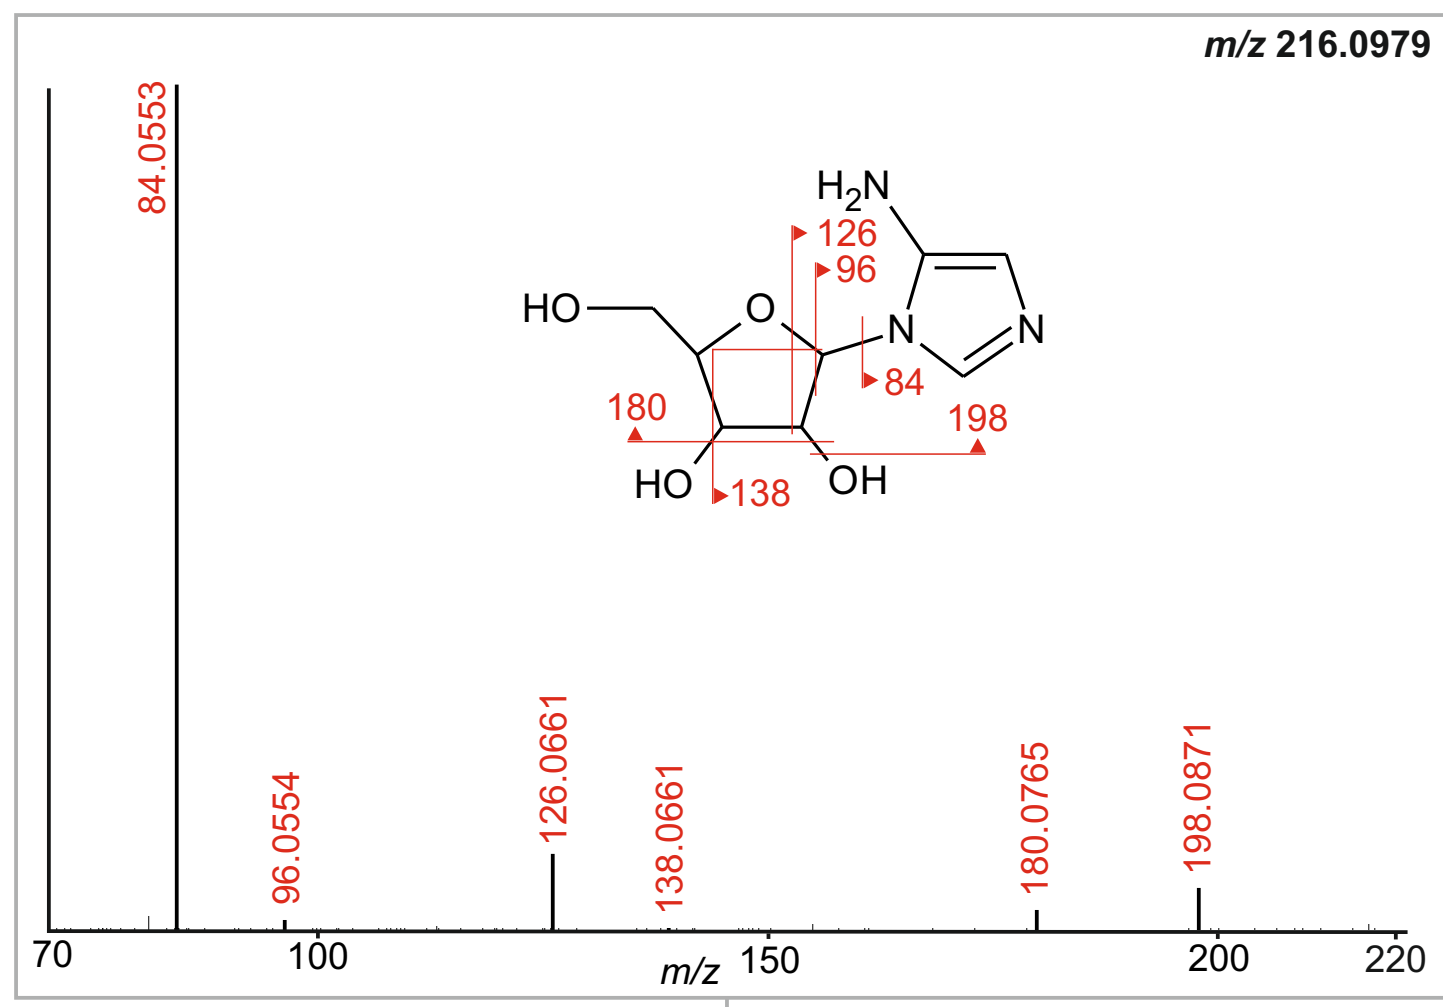

MS<sup>3</sup>

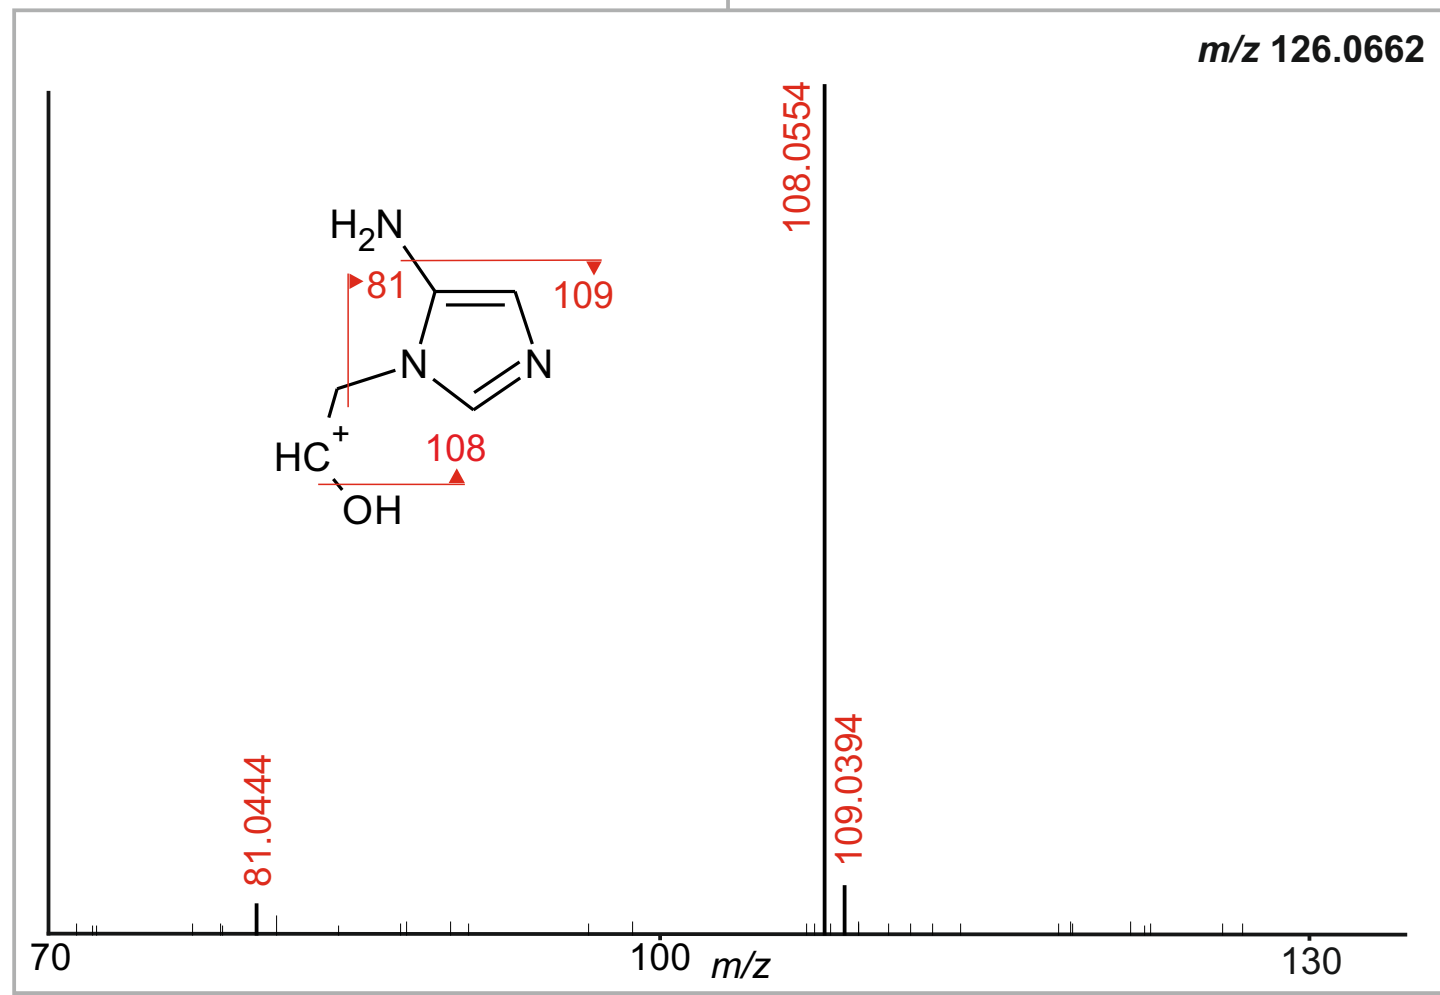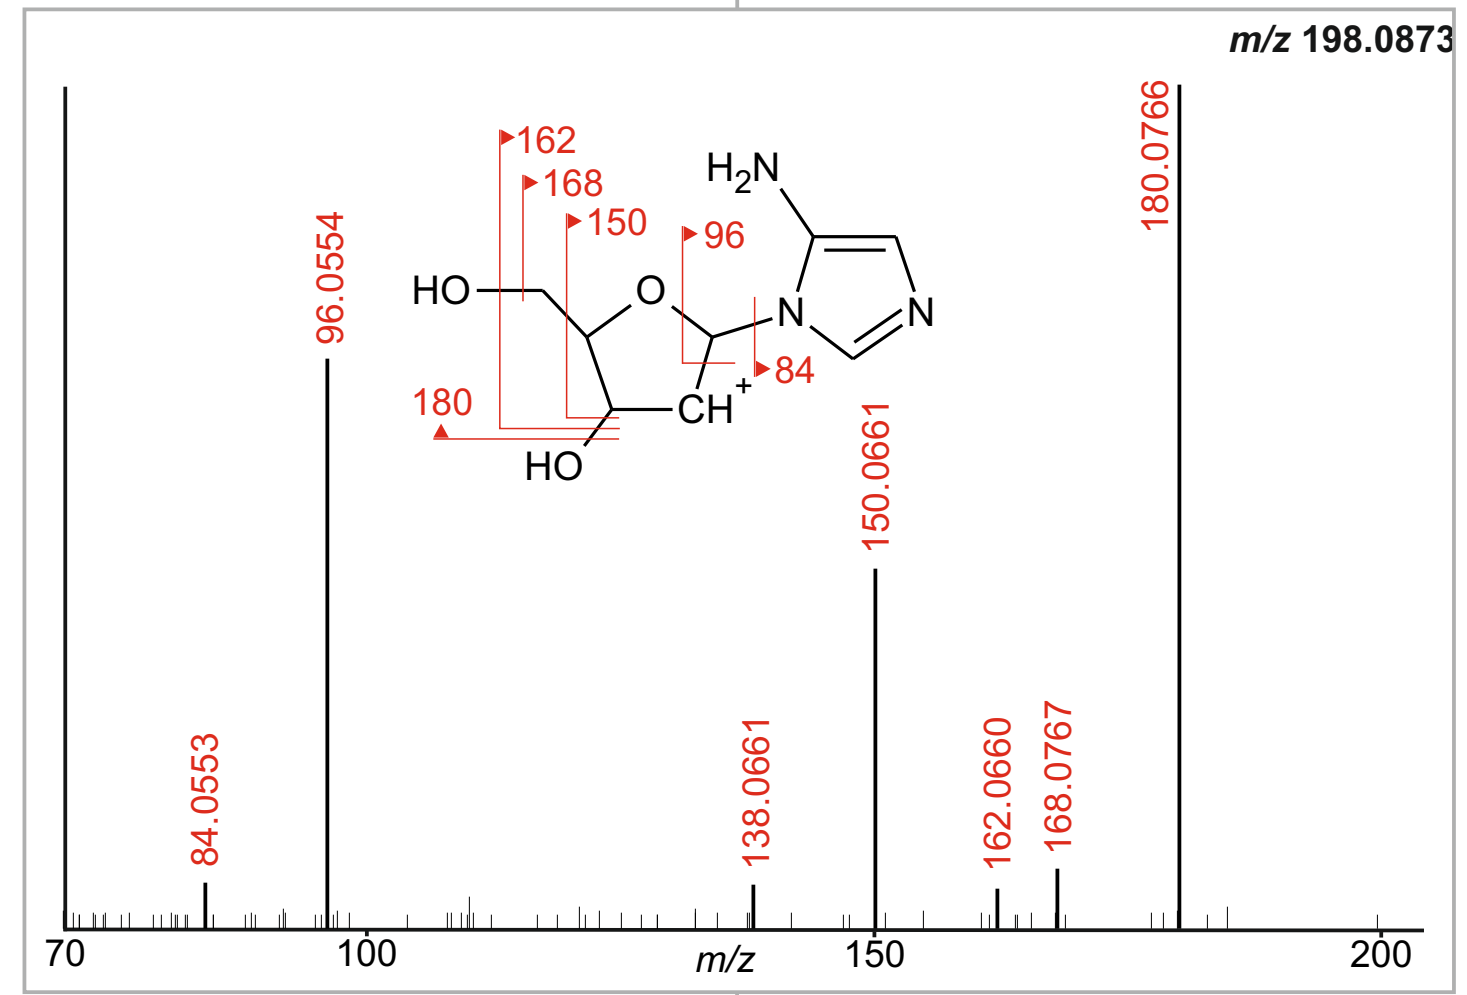

MS<sup>4</sup>

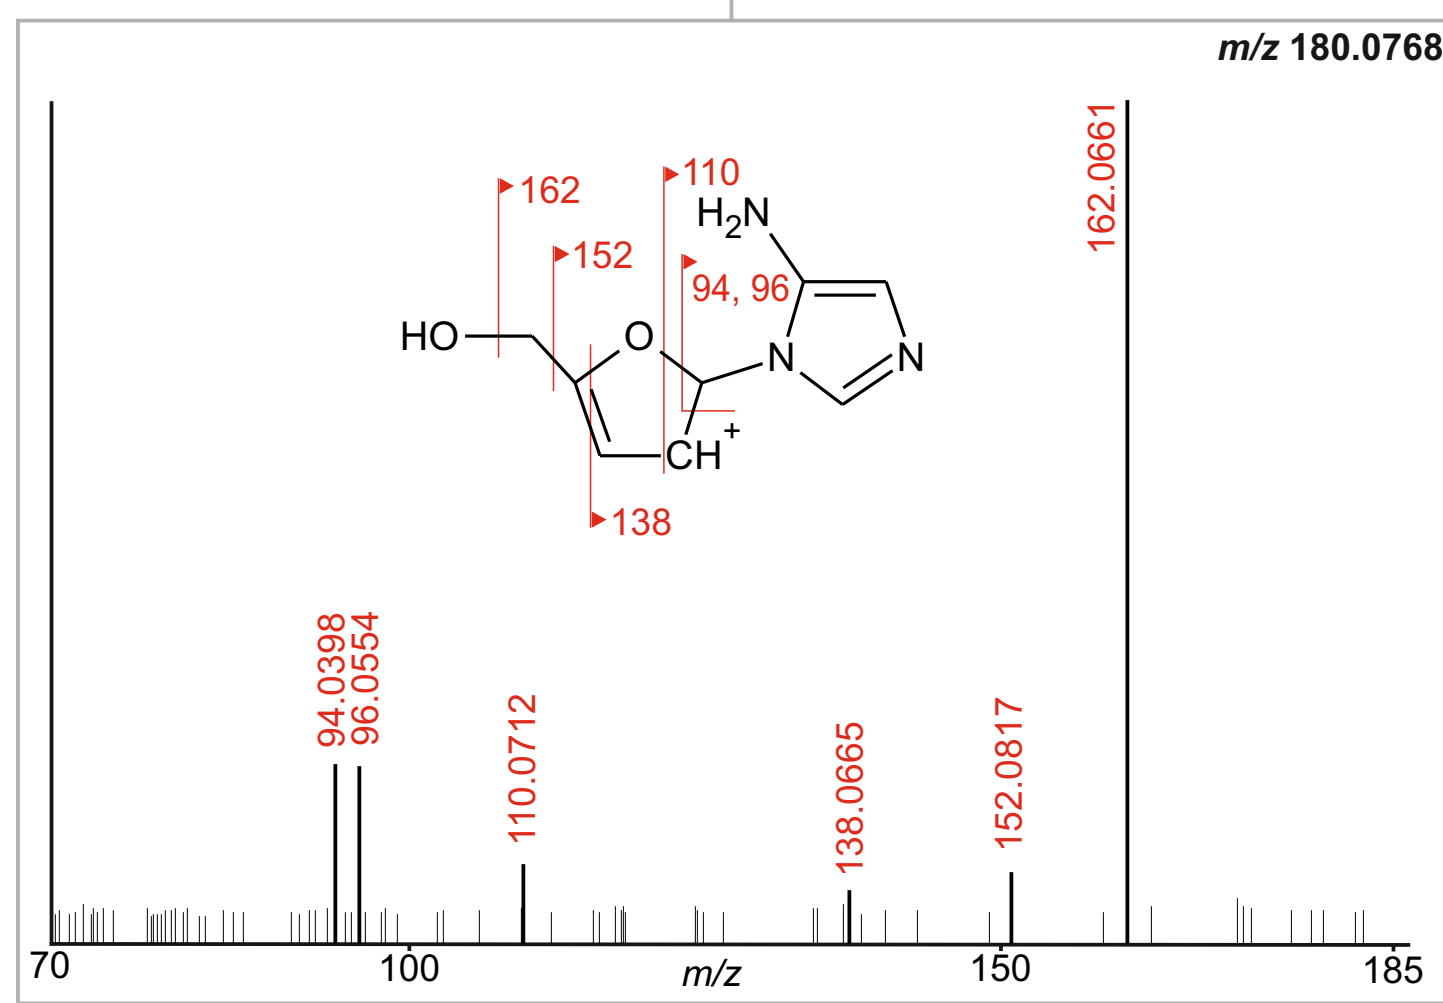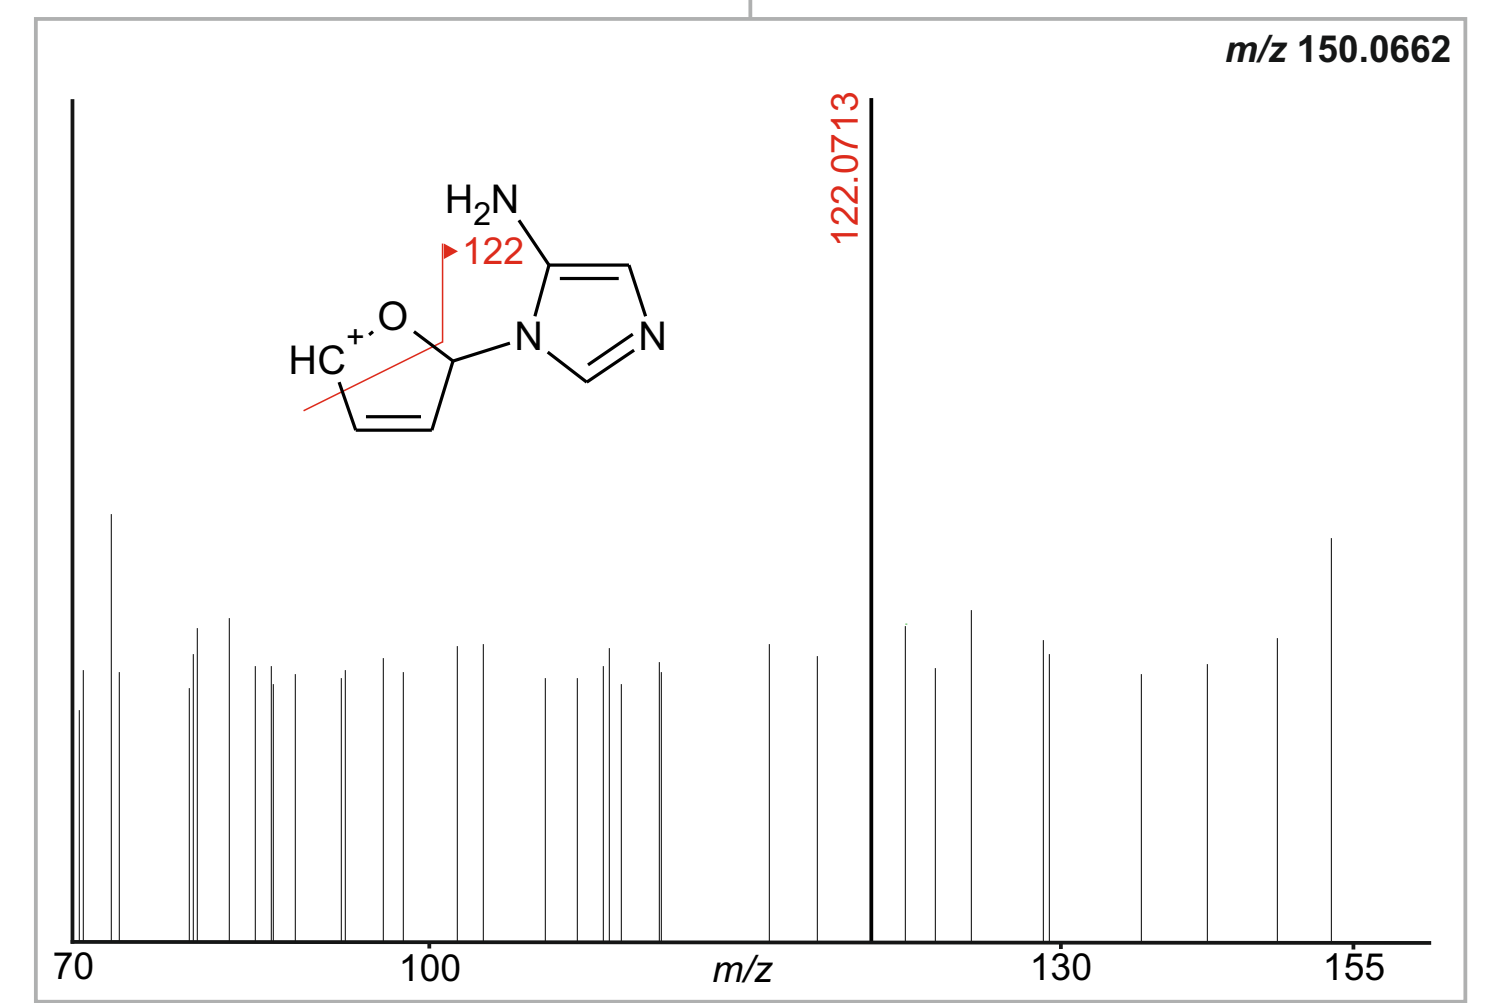

MS<sup>5</sup>

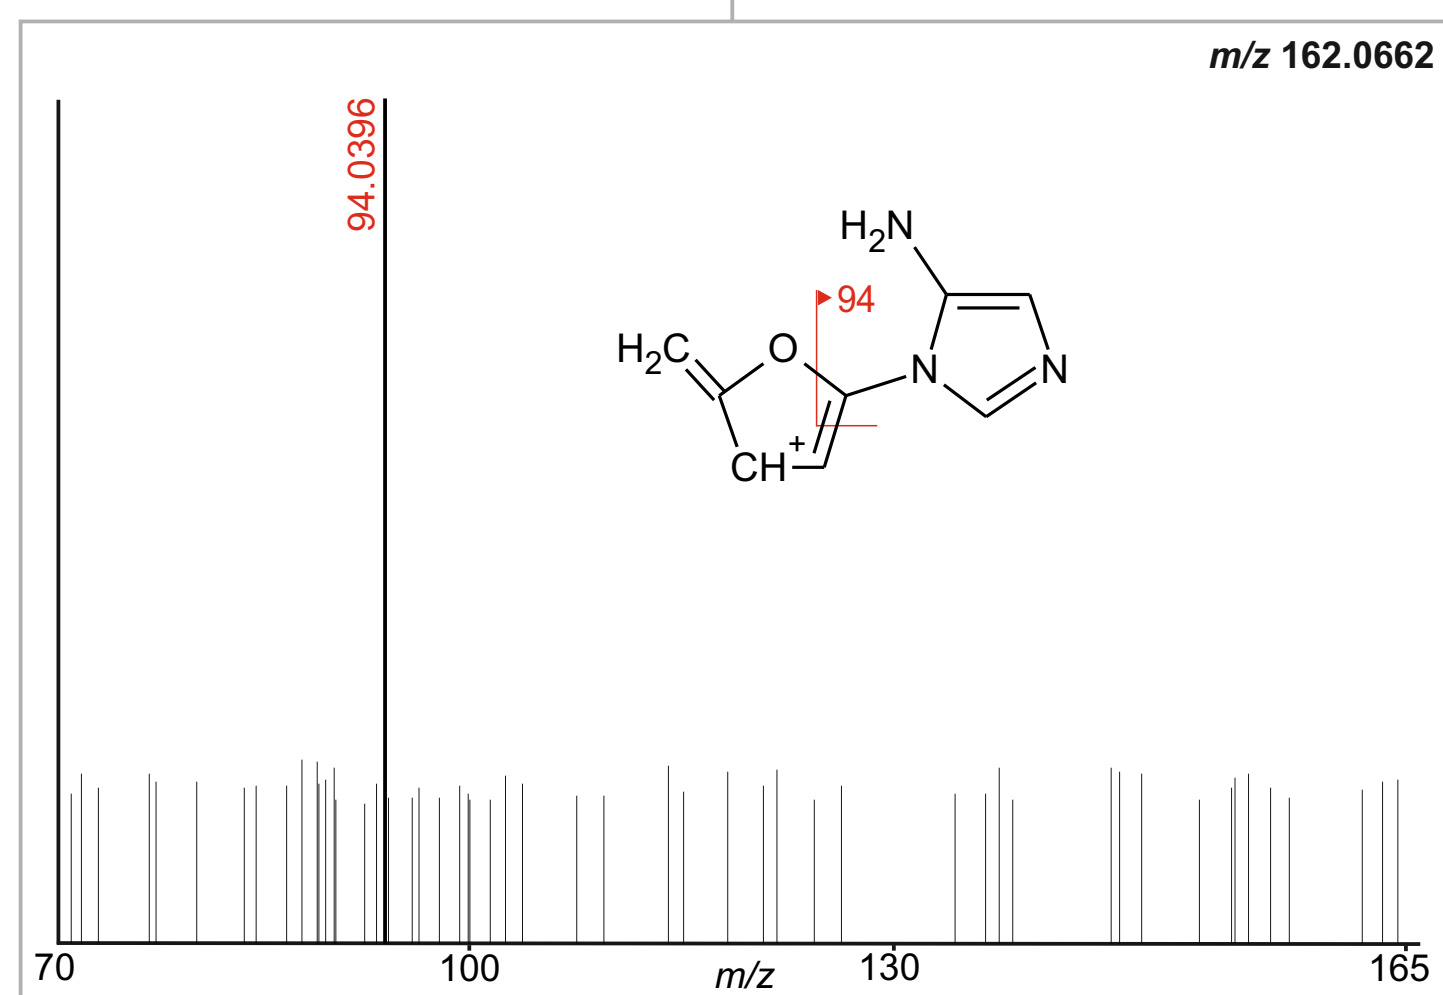

**AIR**

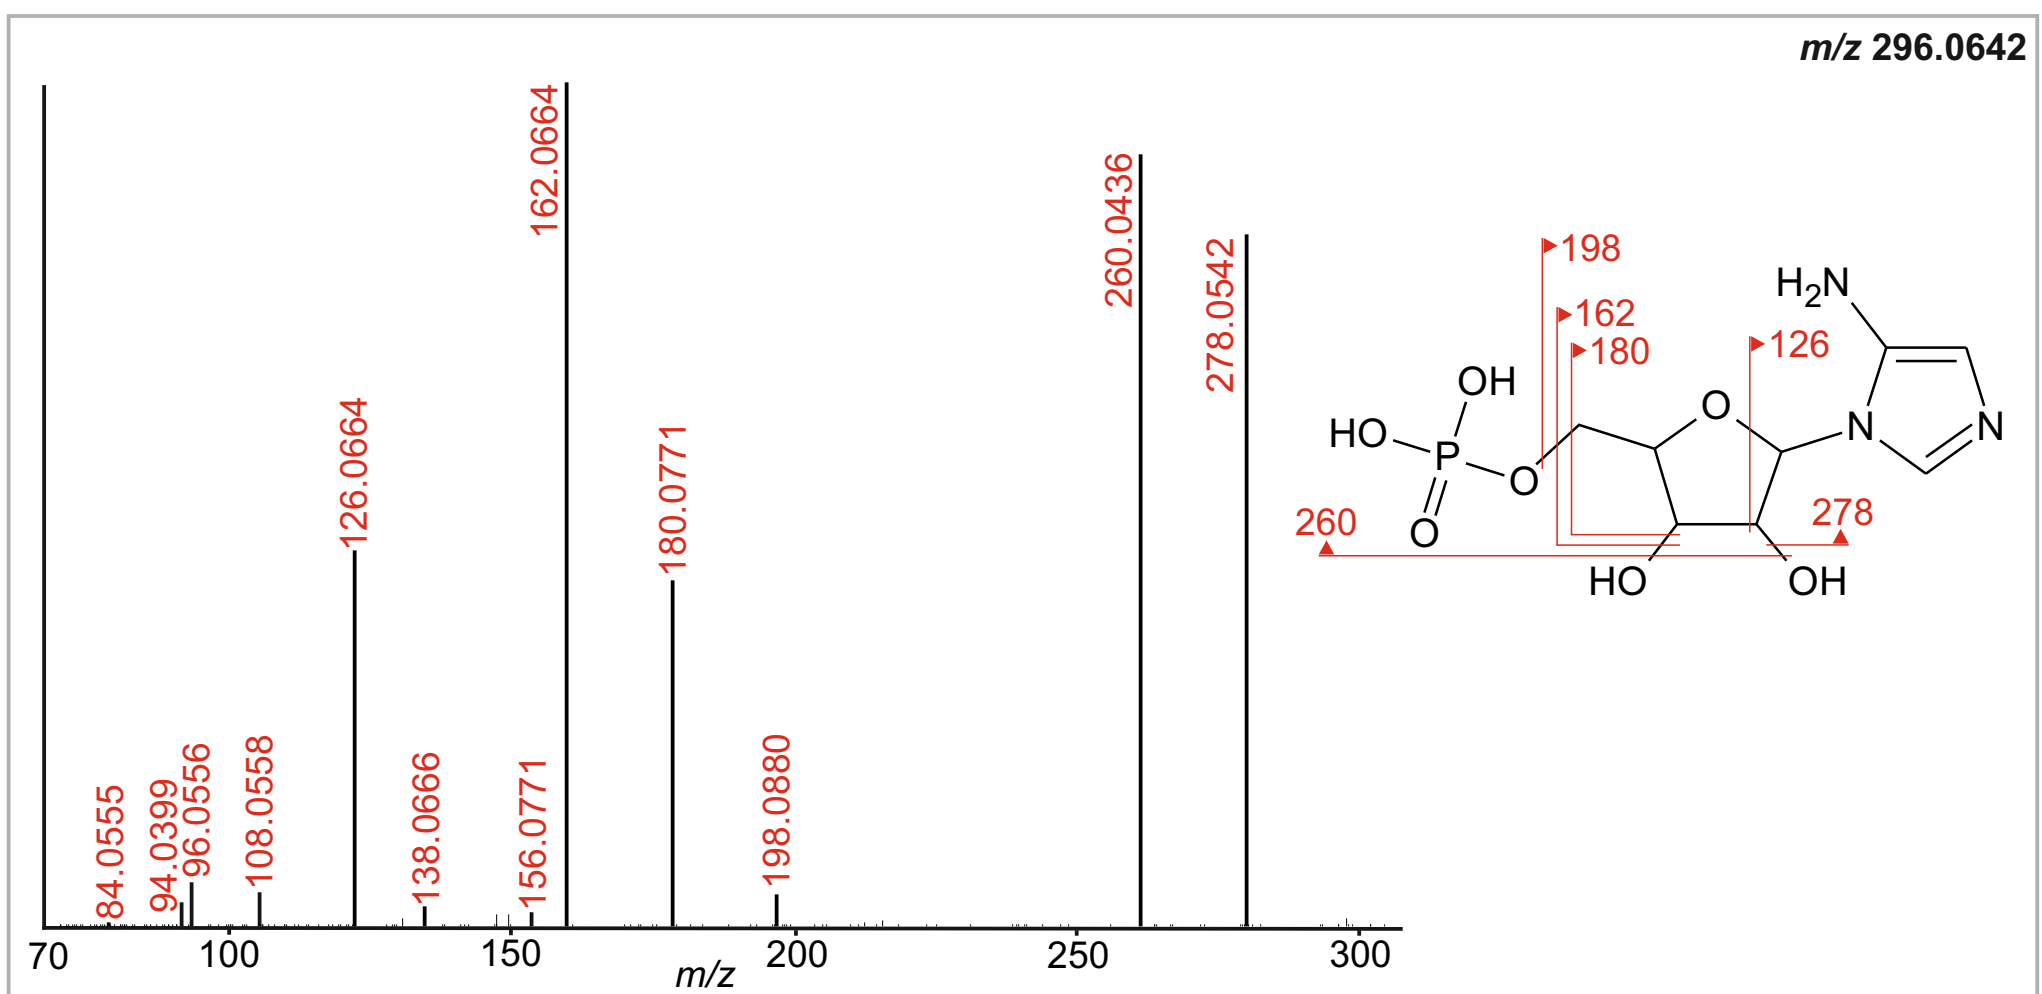

MS<sup>2</sup>

MS<sup>3</sup>

MS<sup>4</sup>

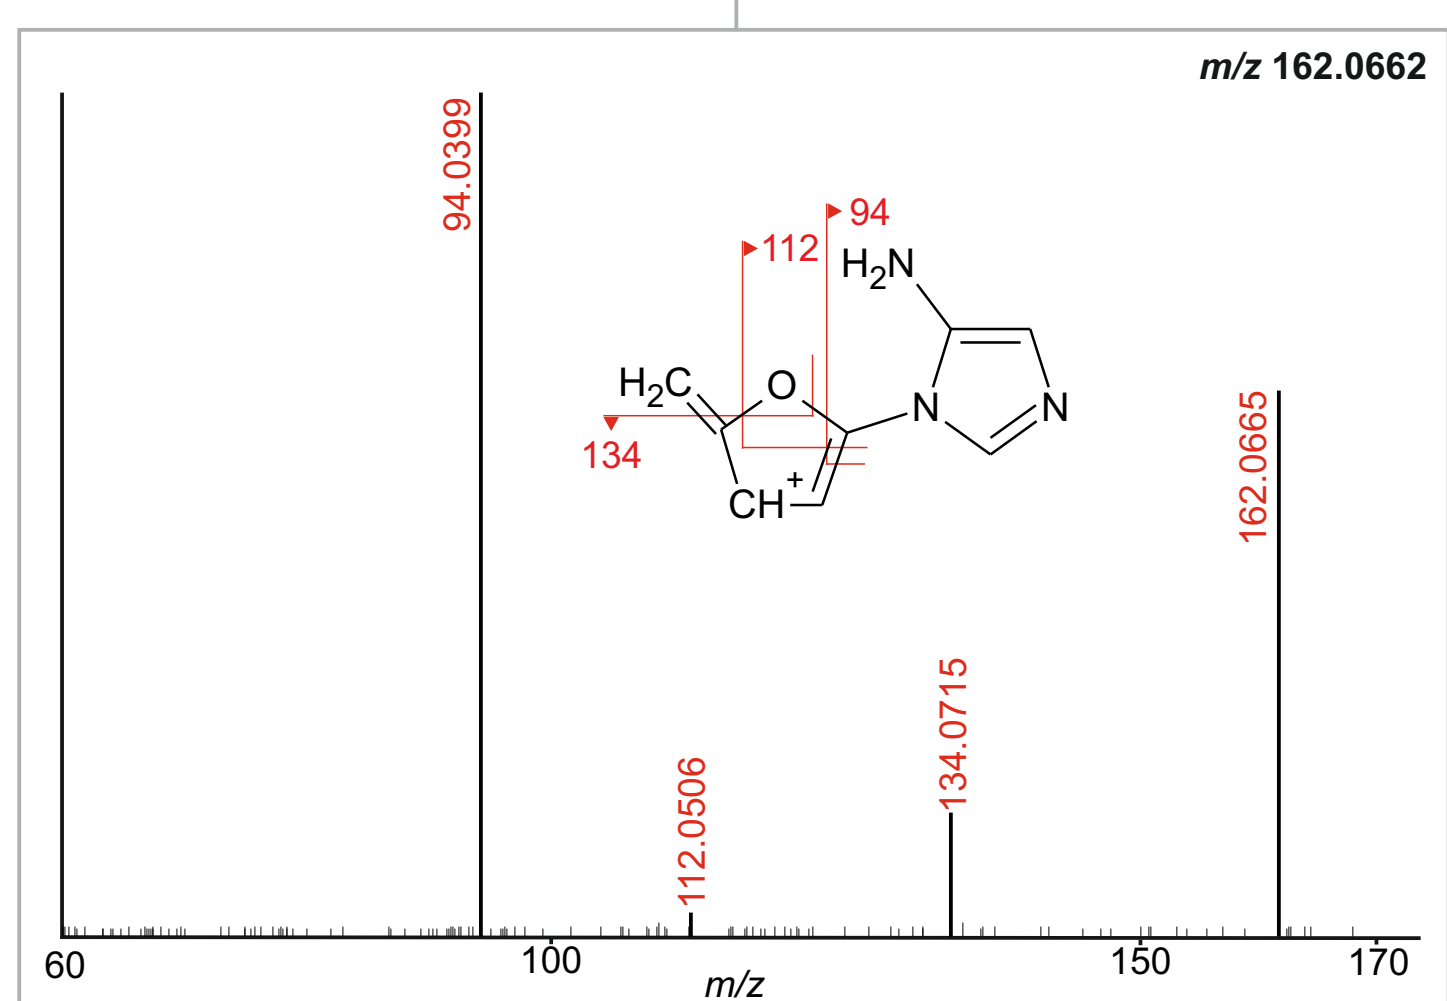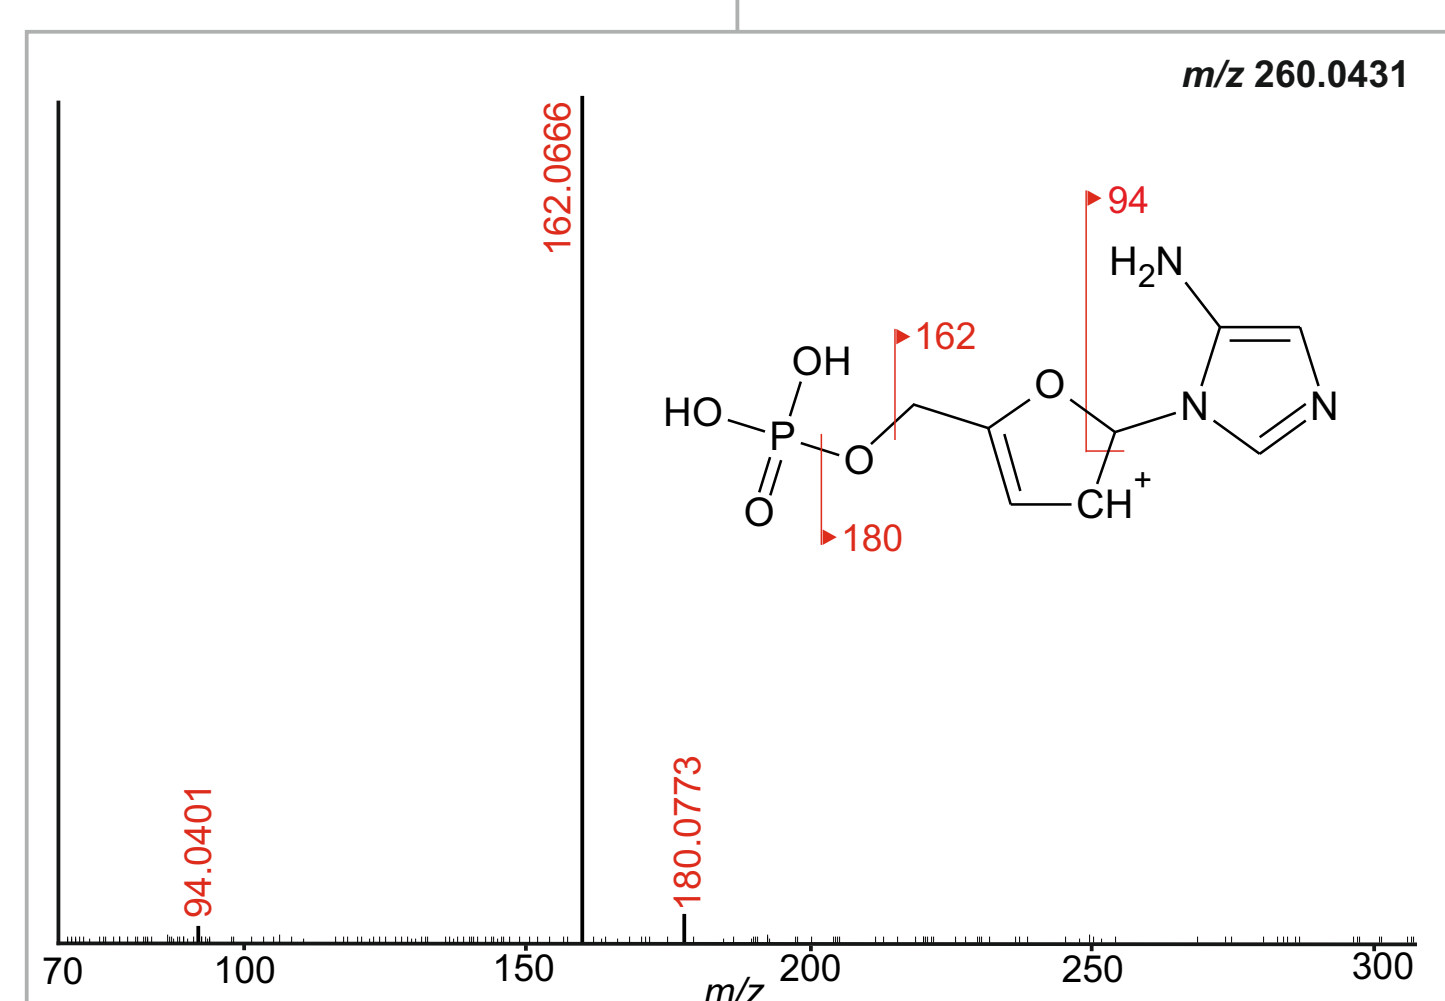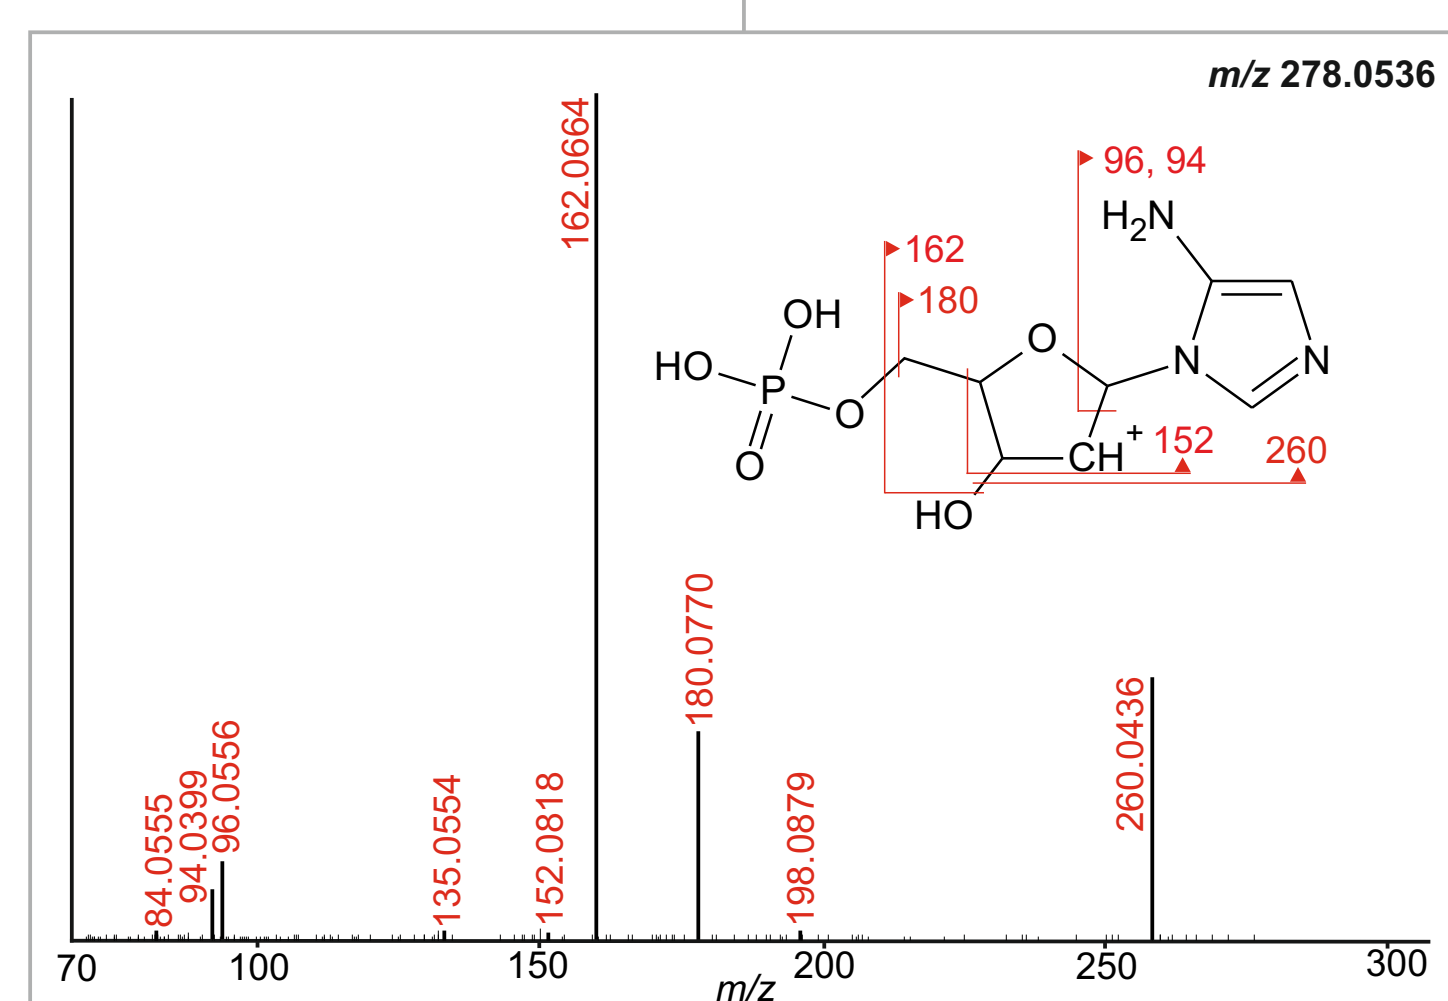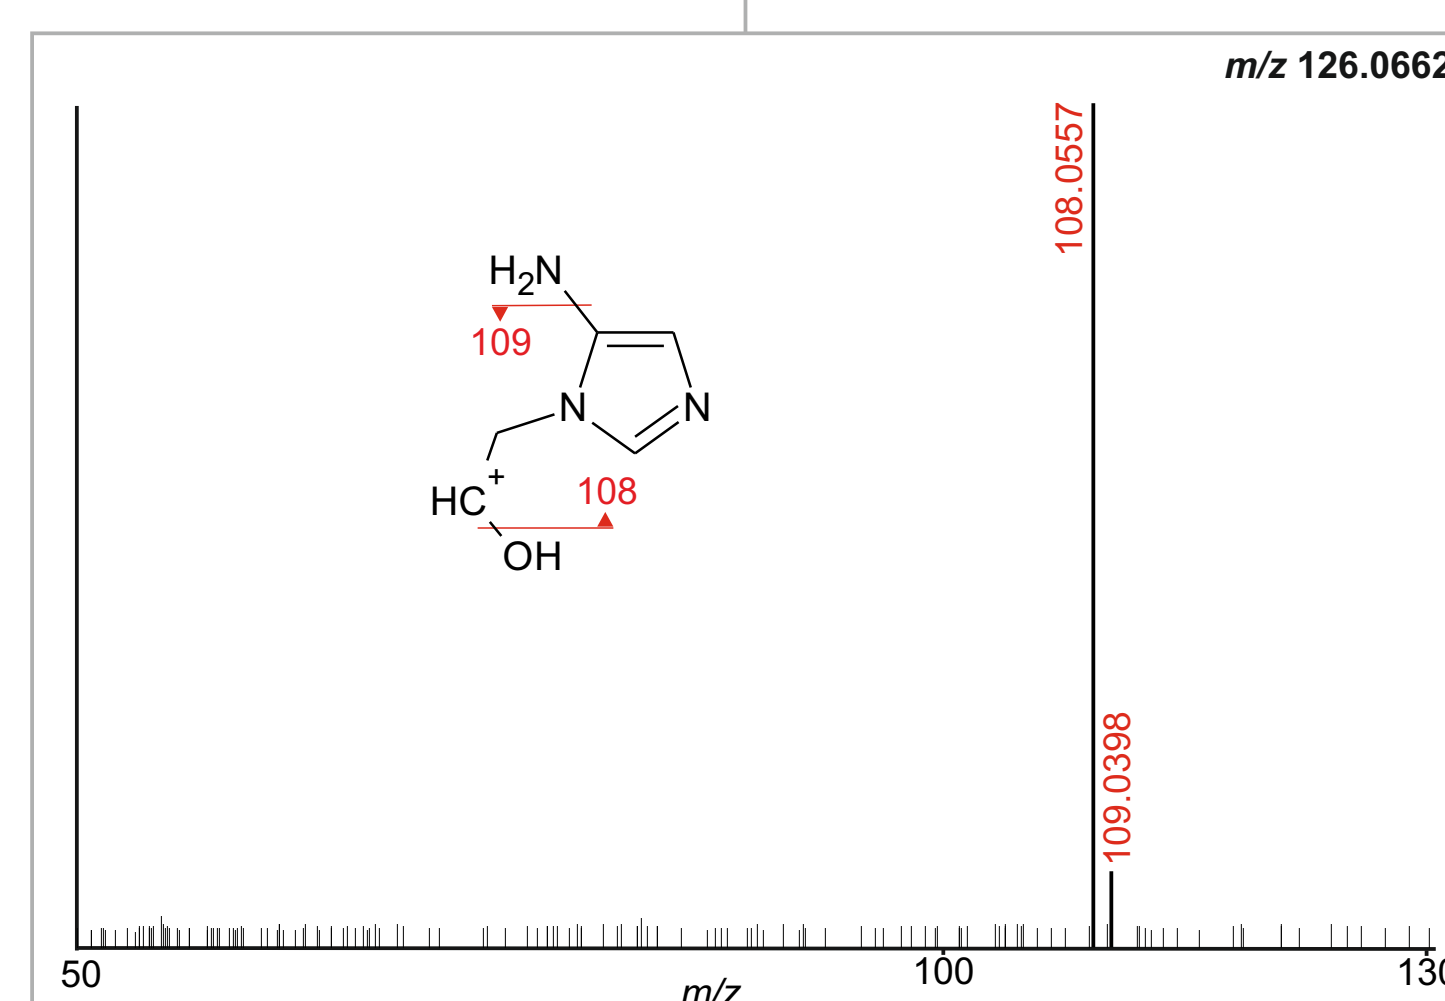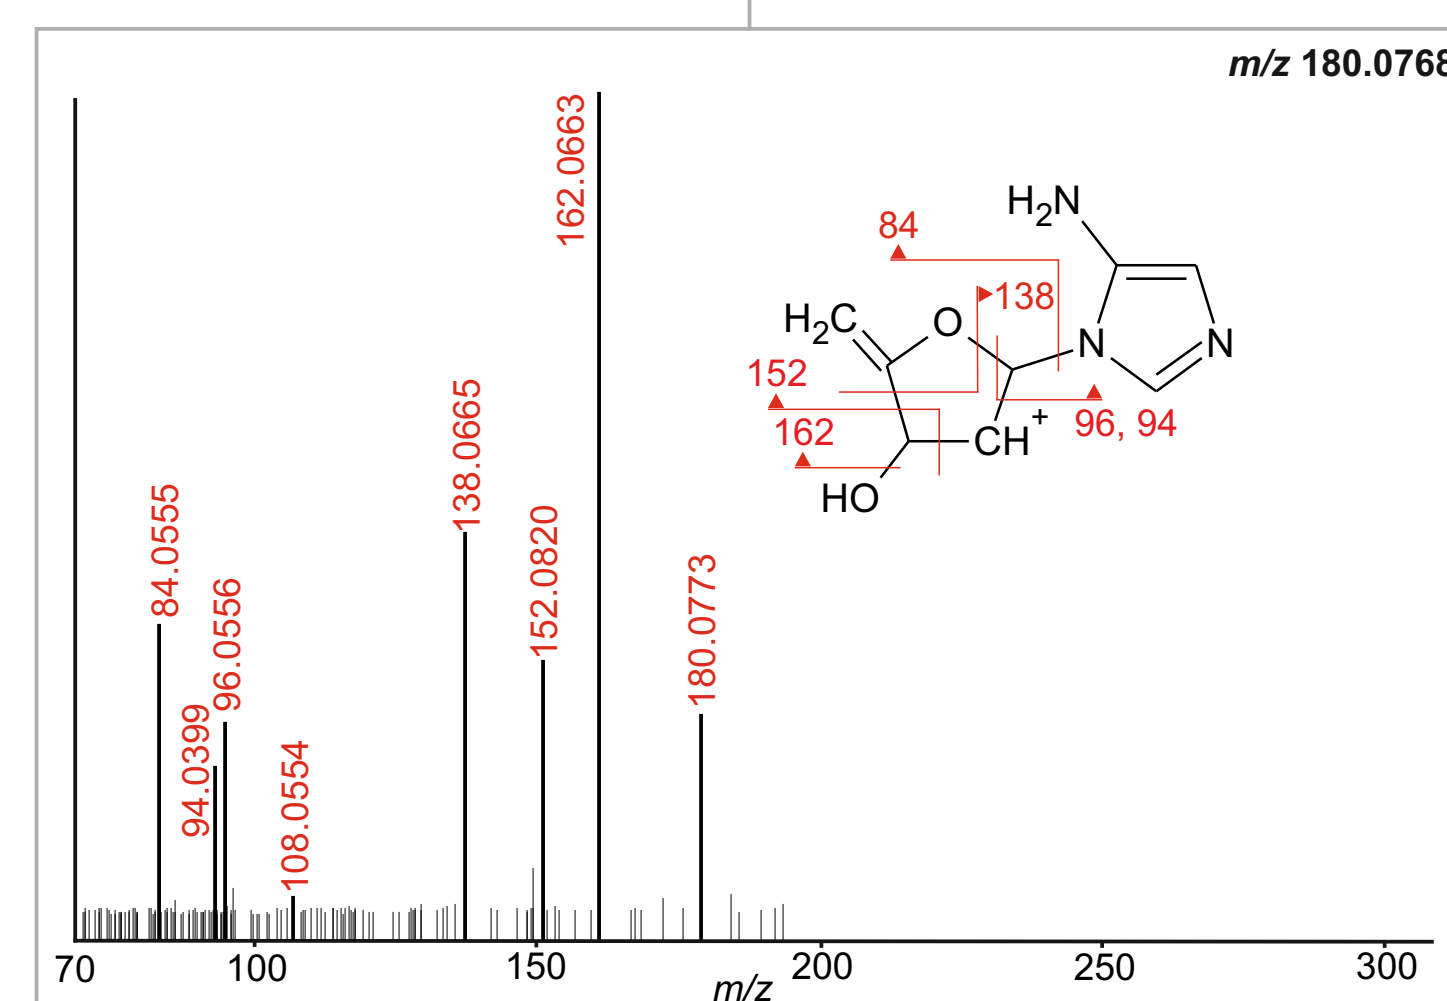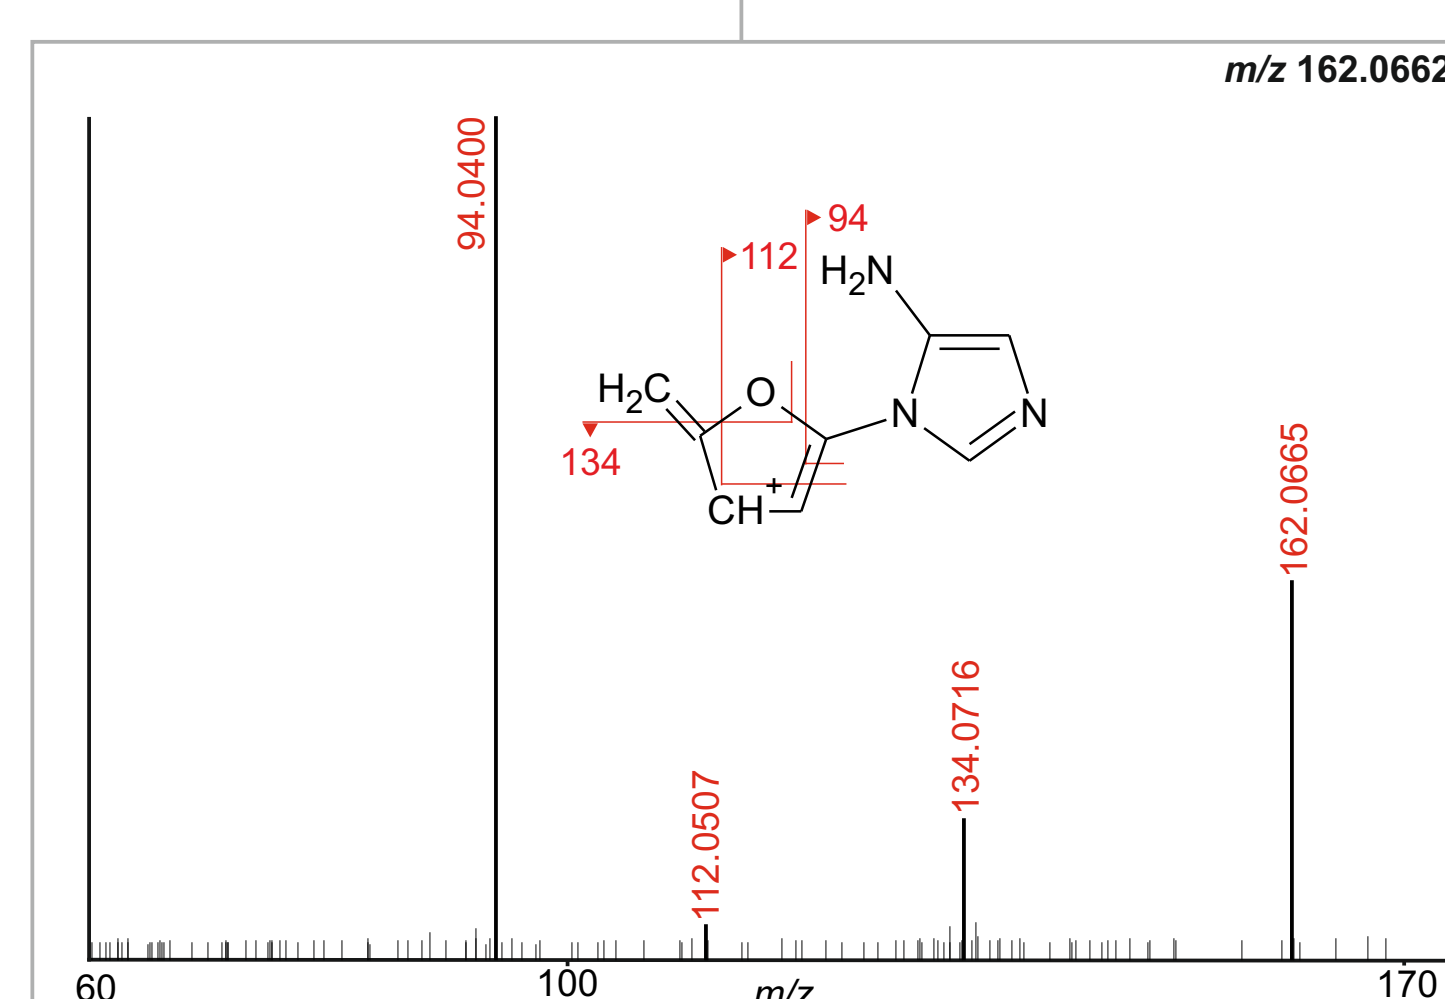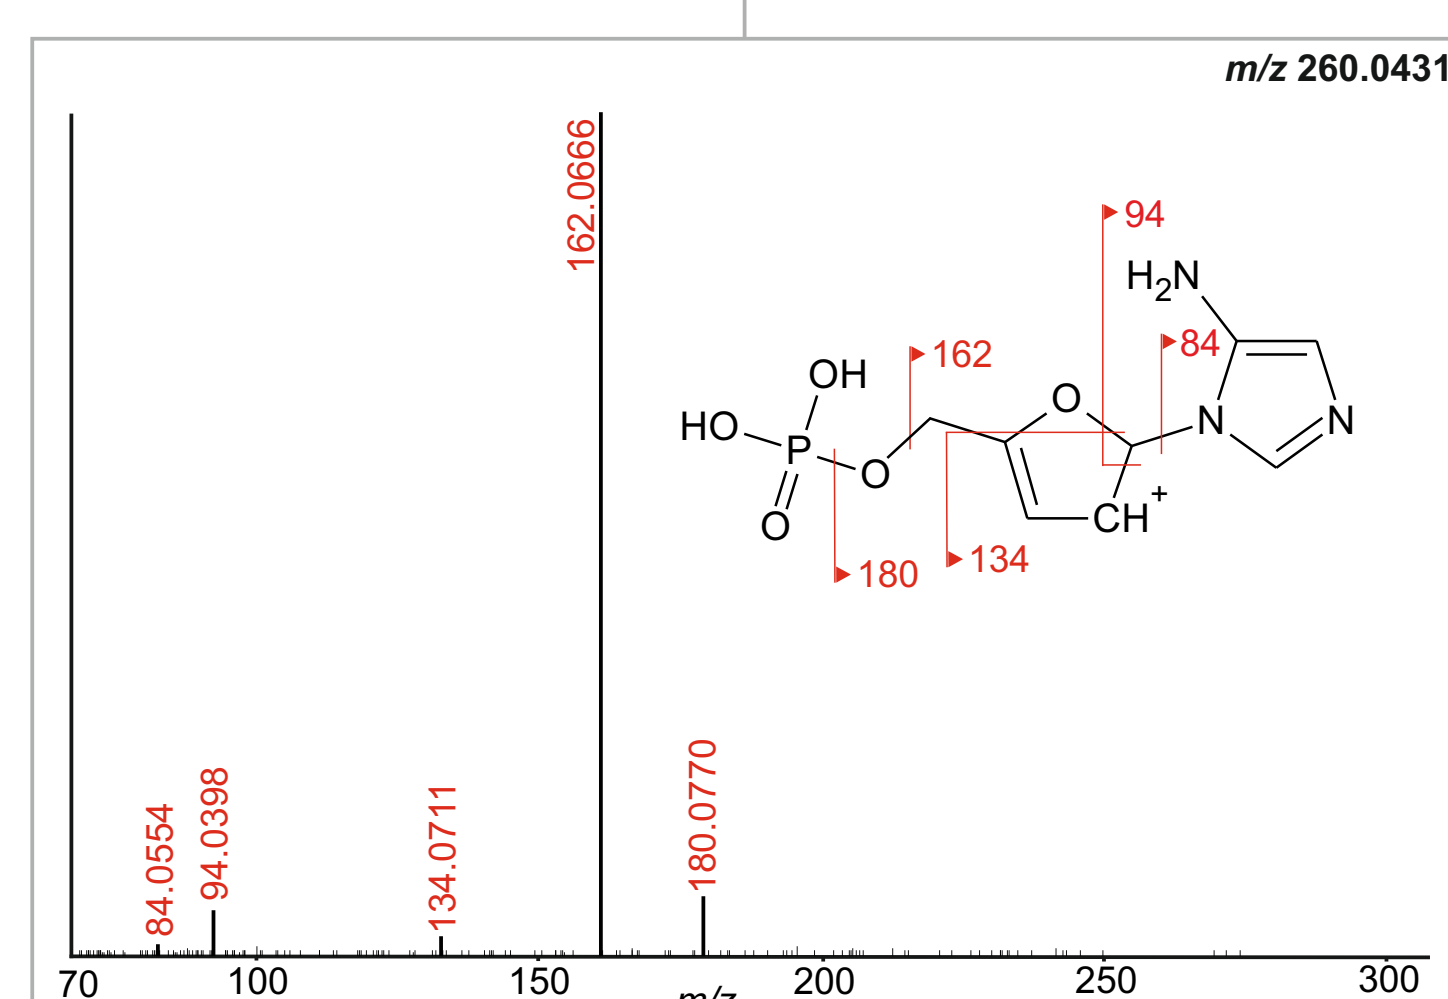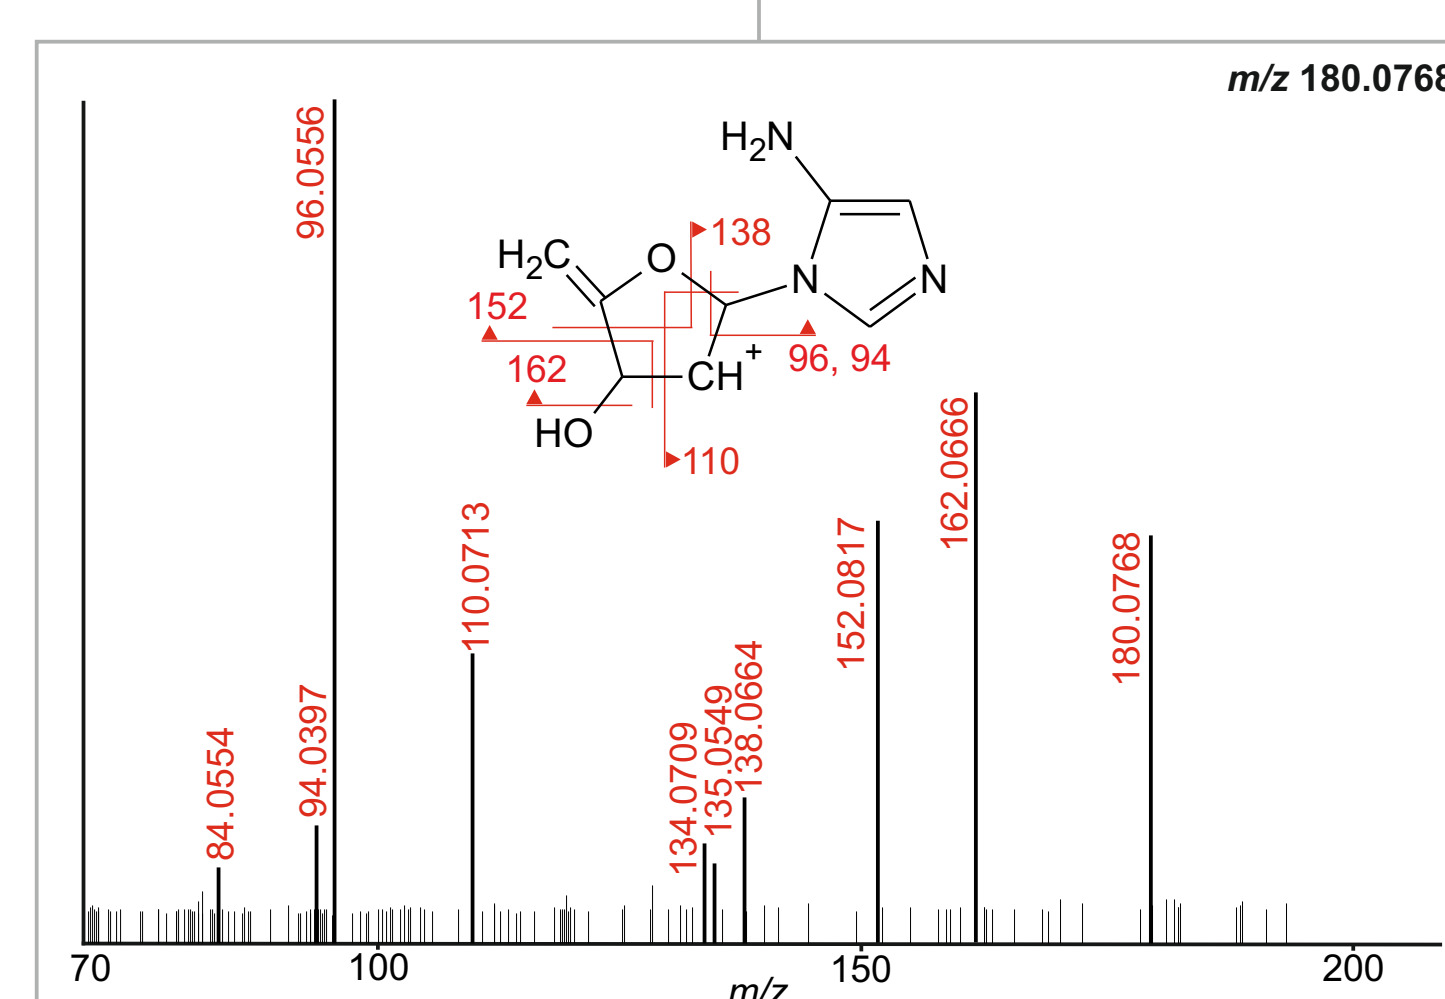



# CAIr

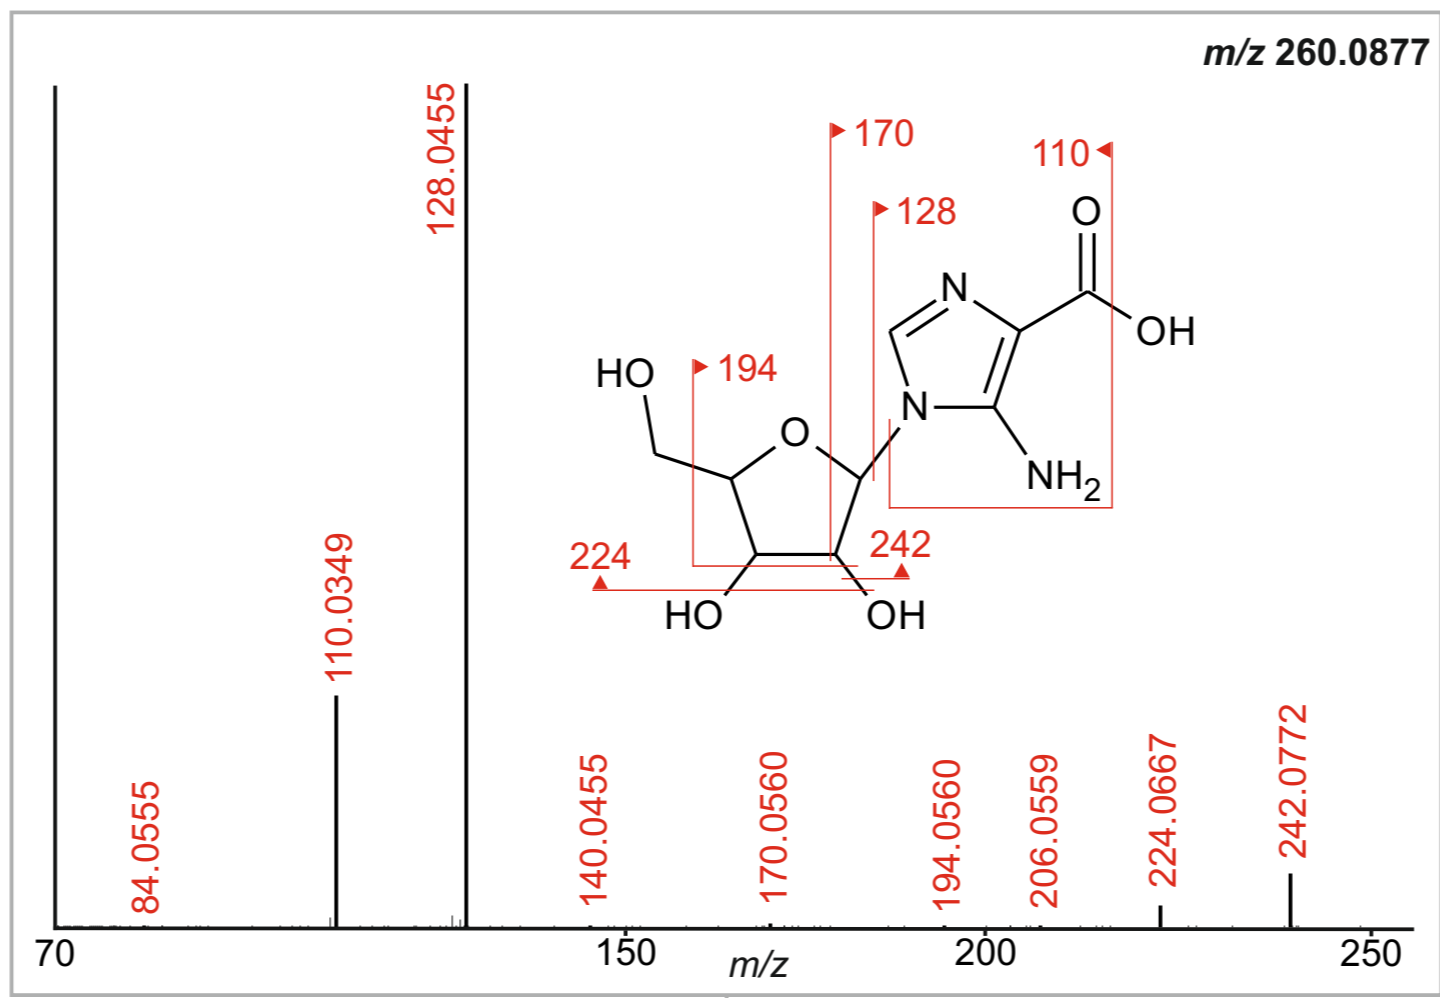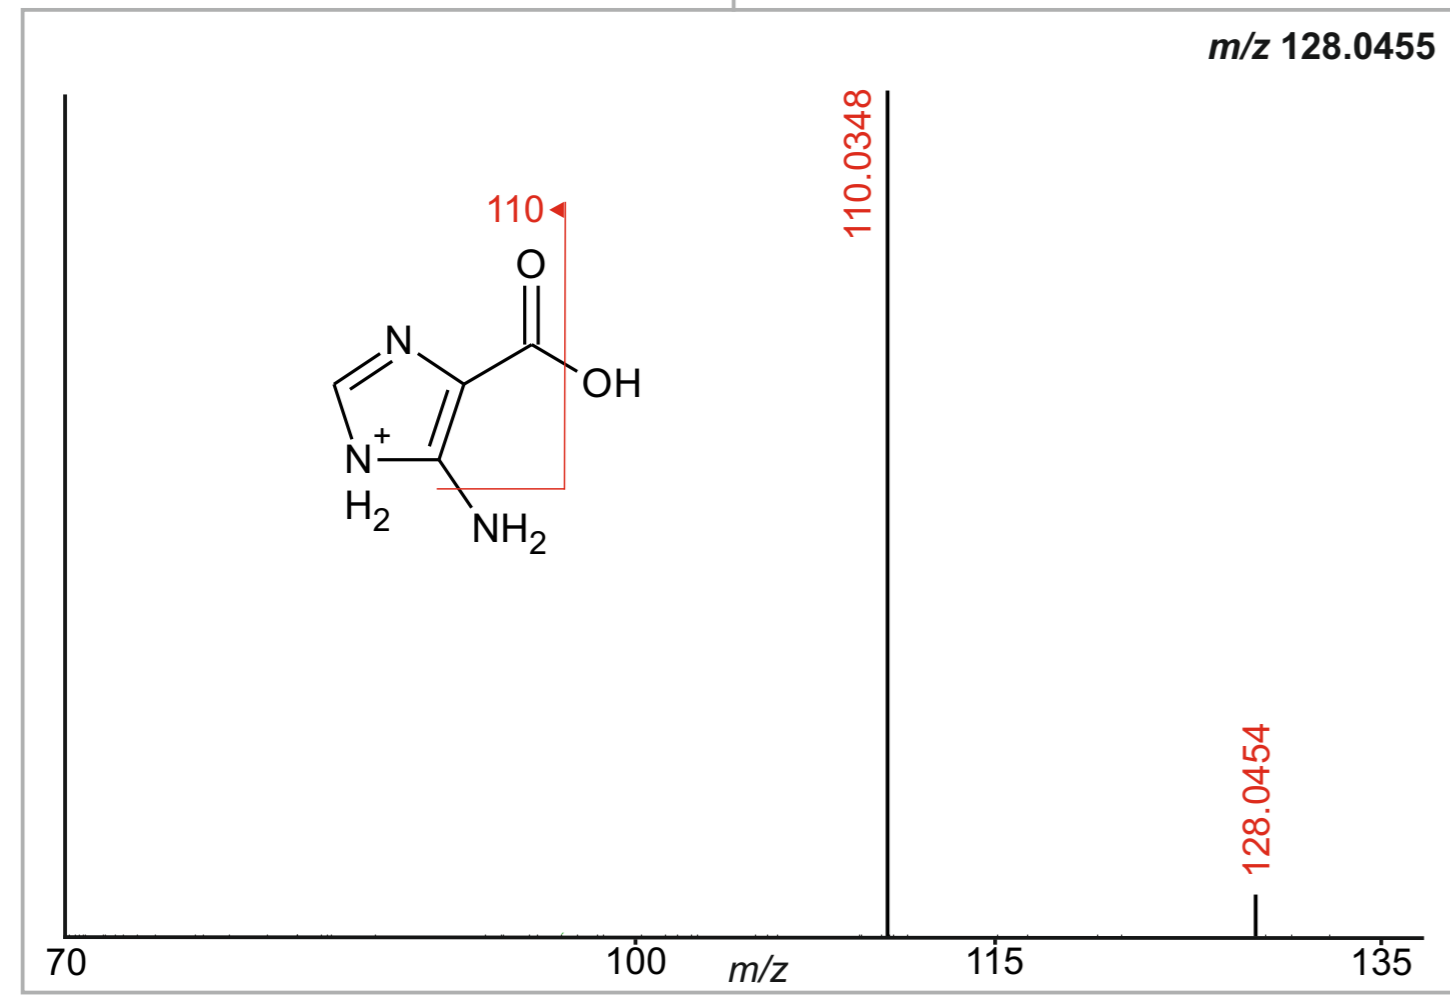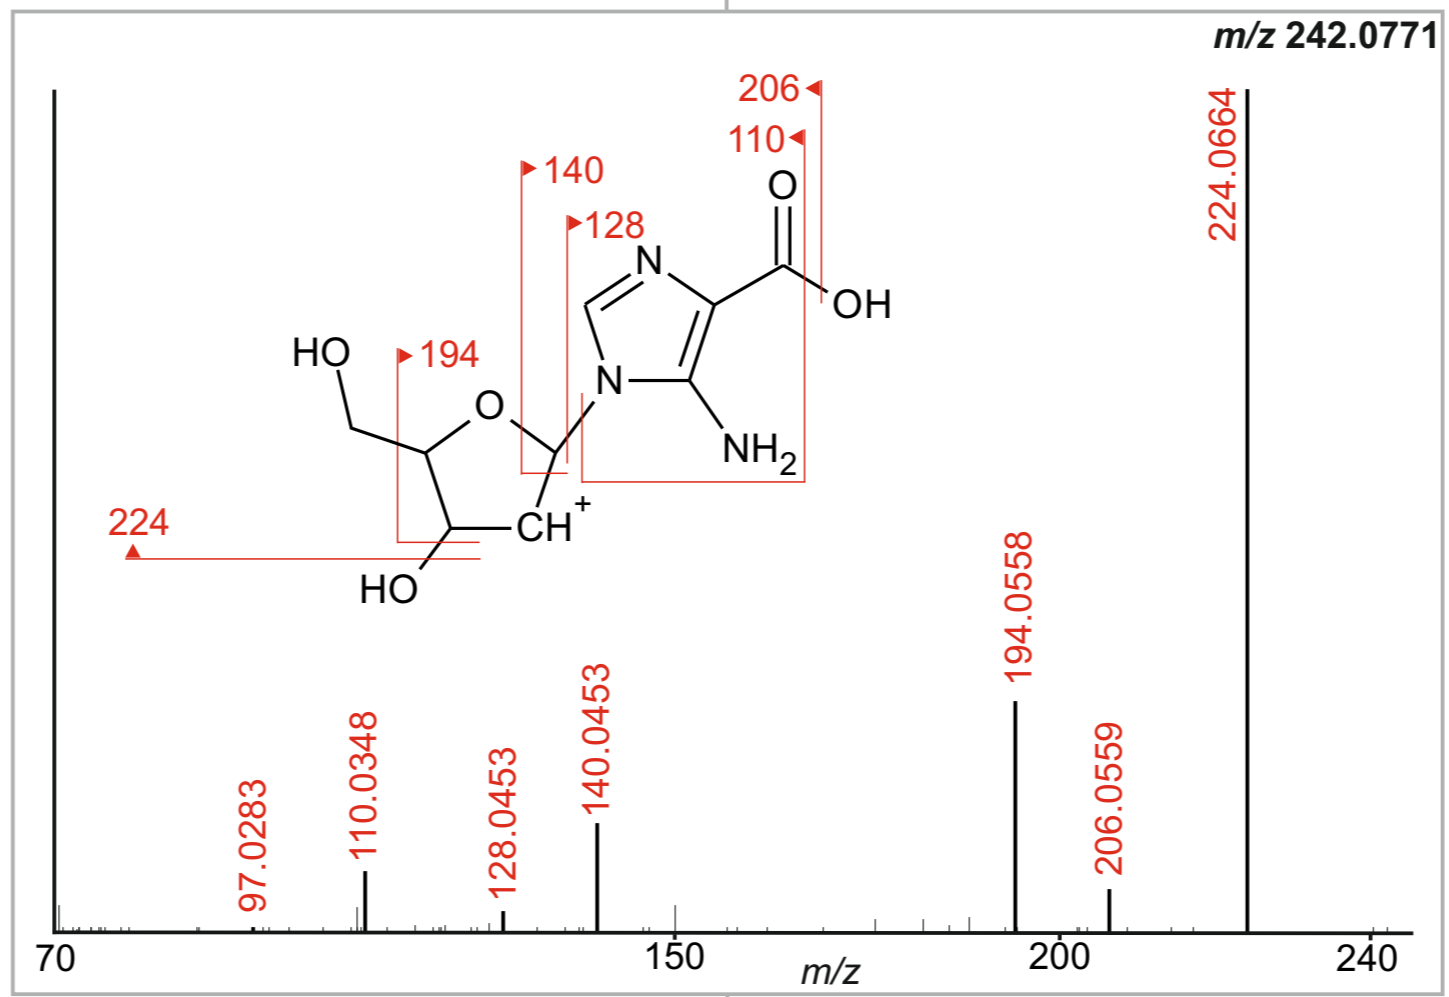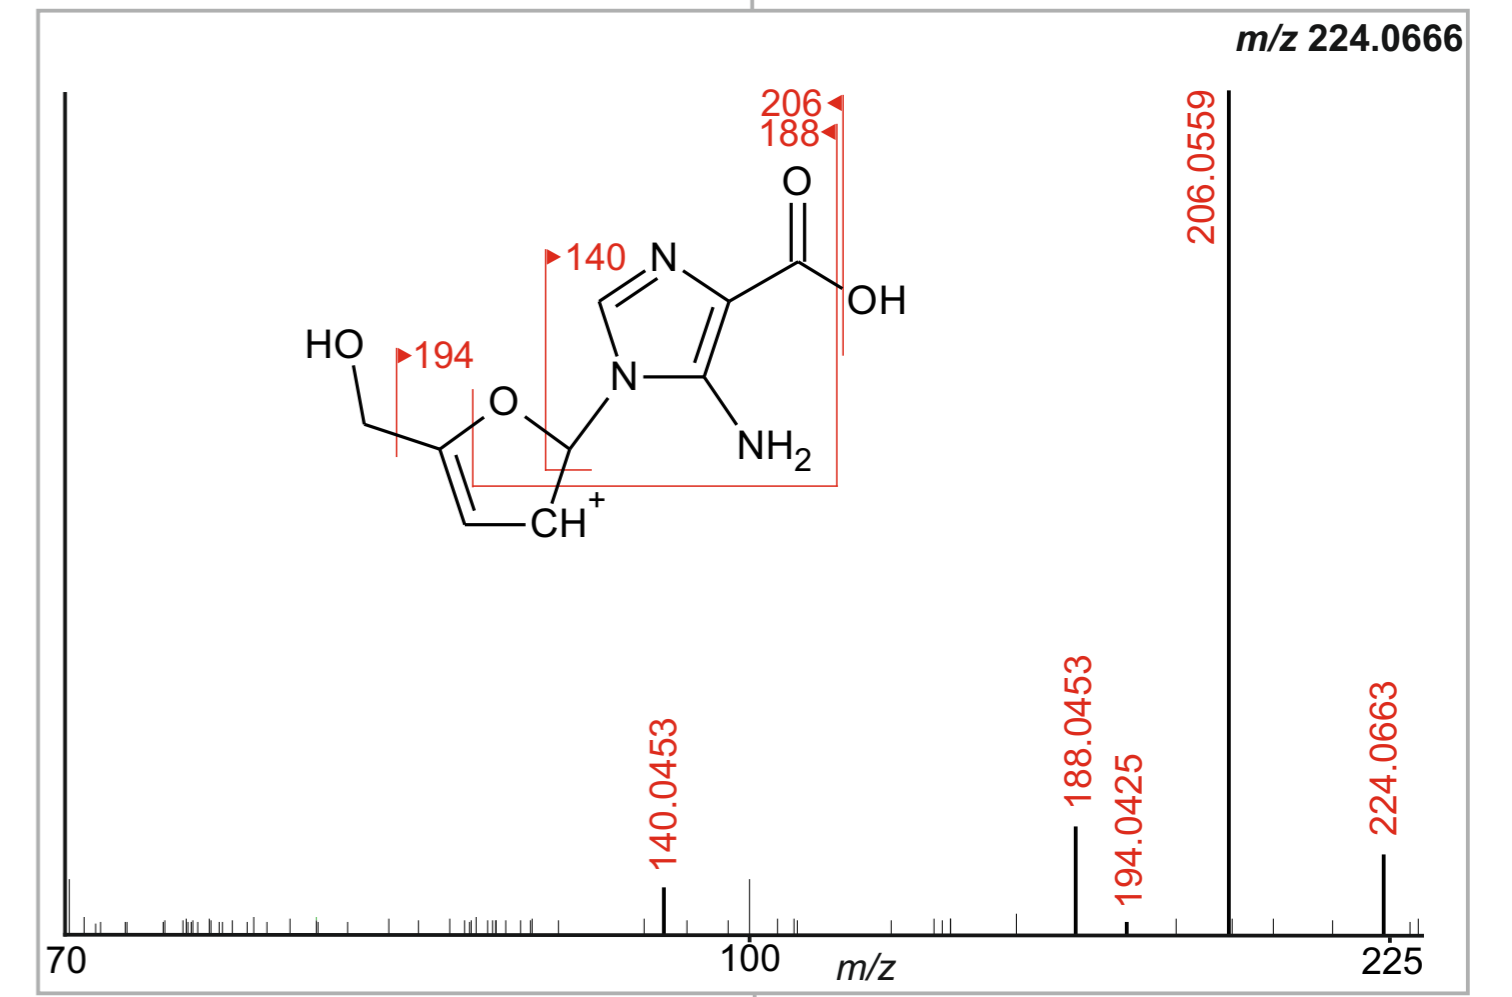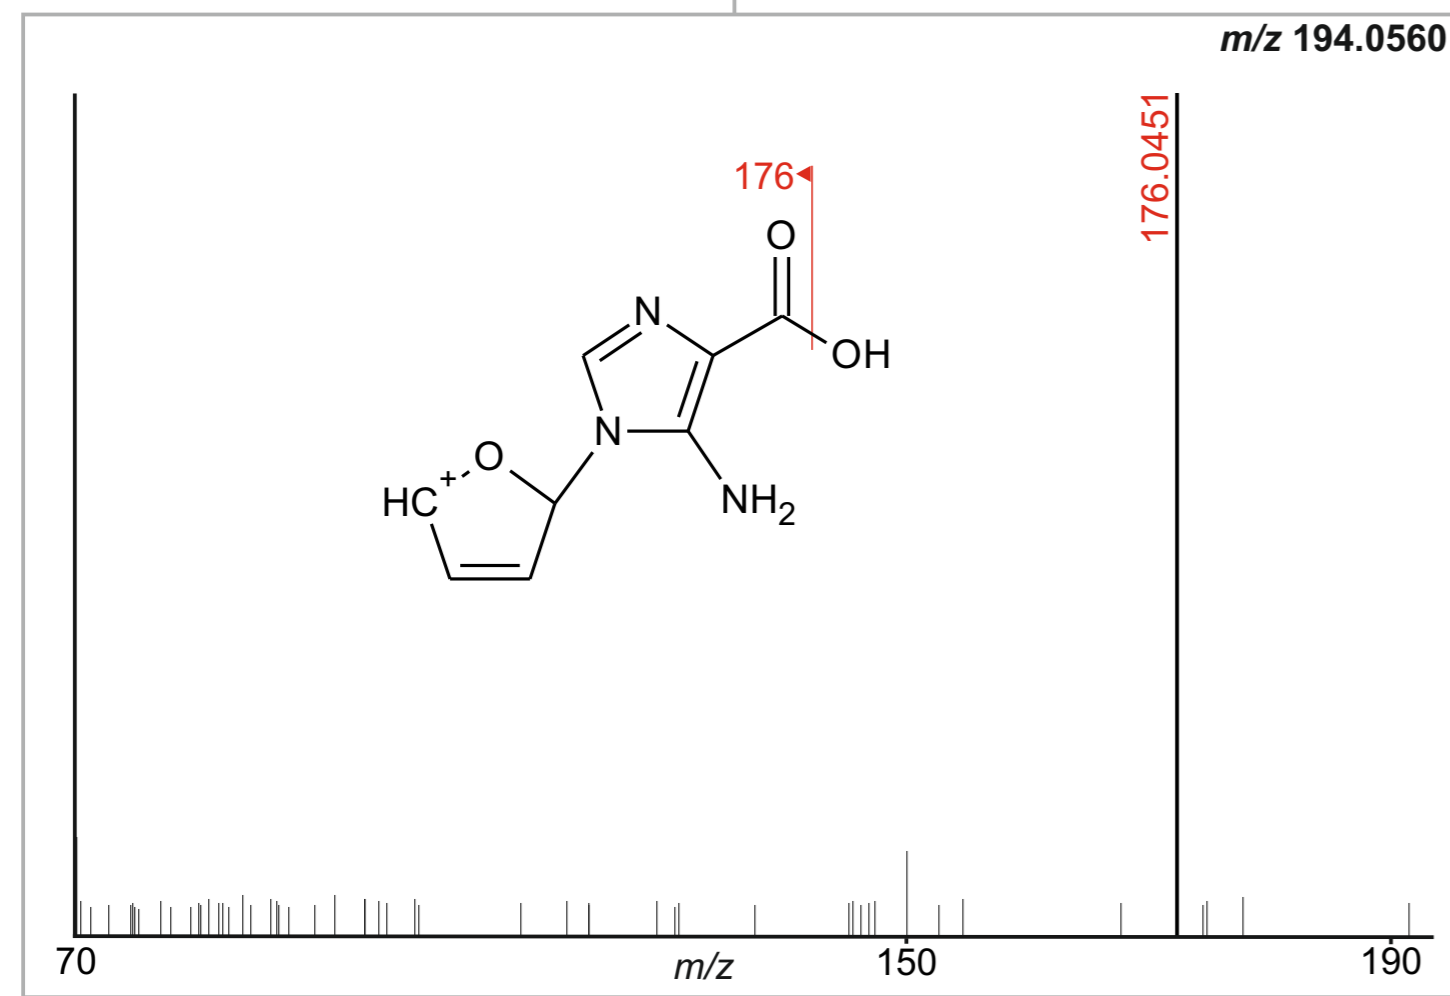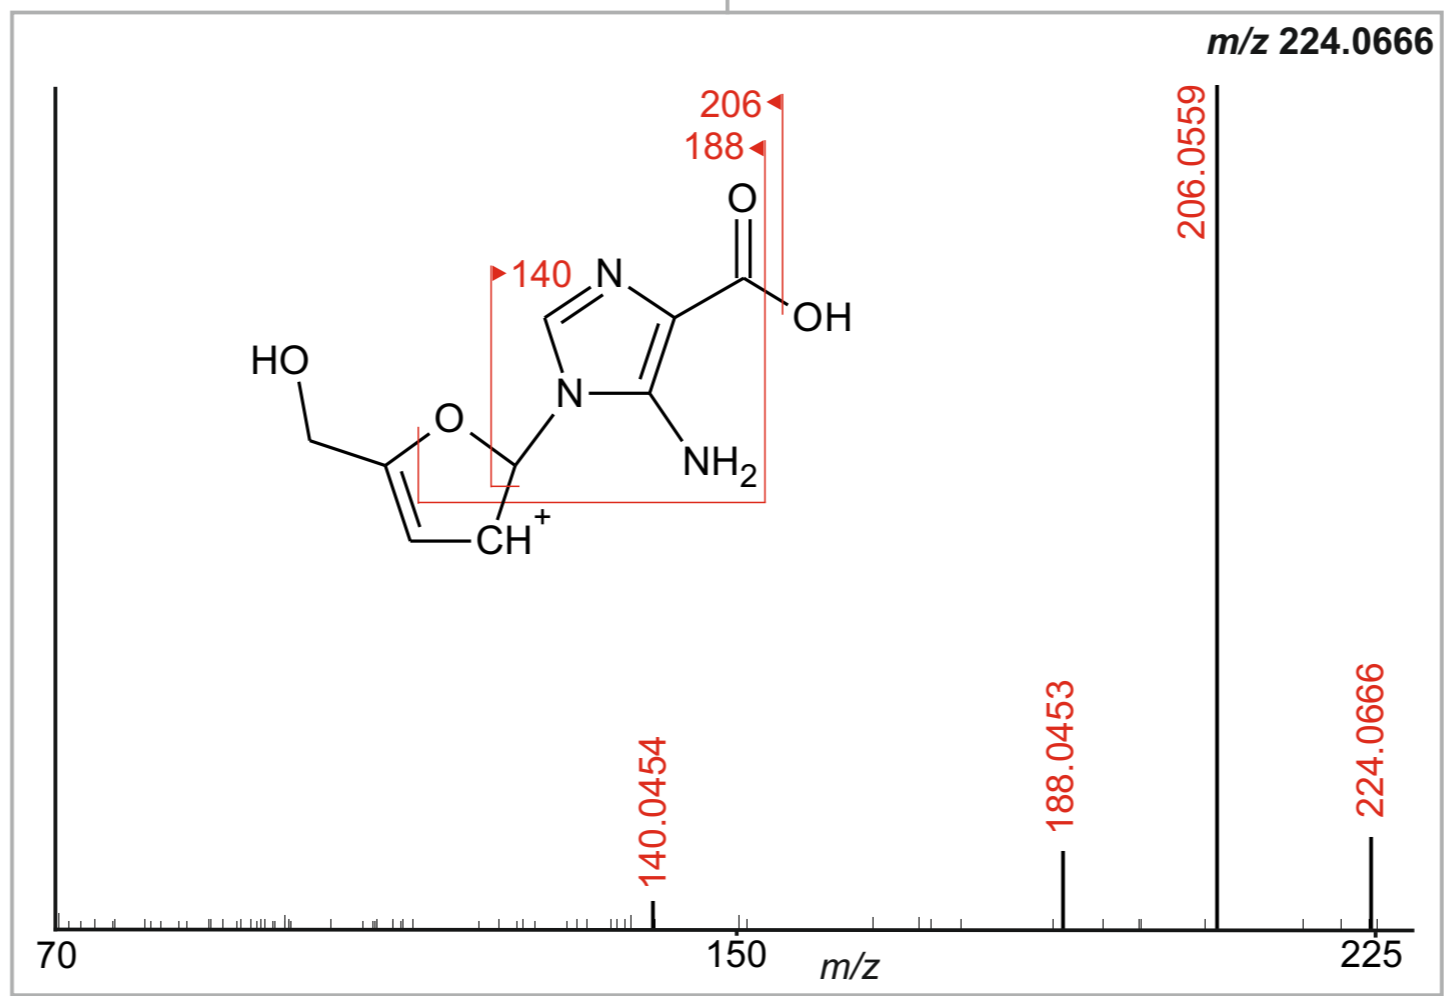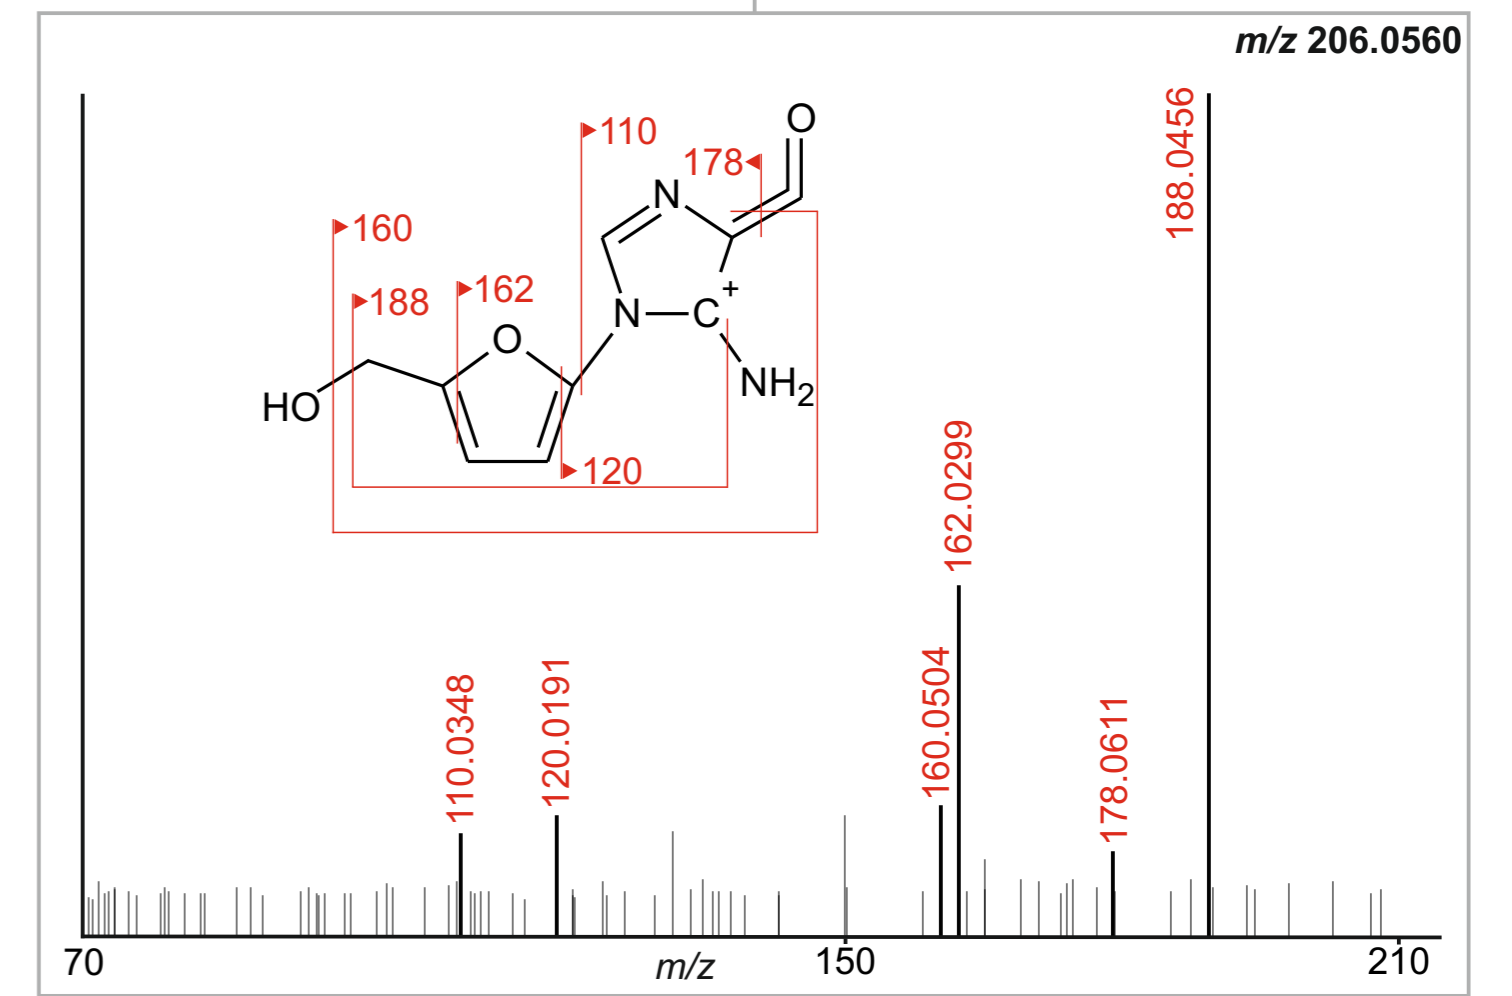

# CAIR

MS<sup>2</sup>

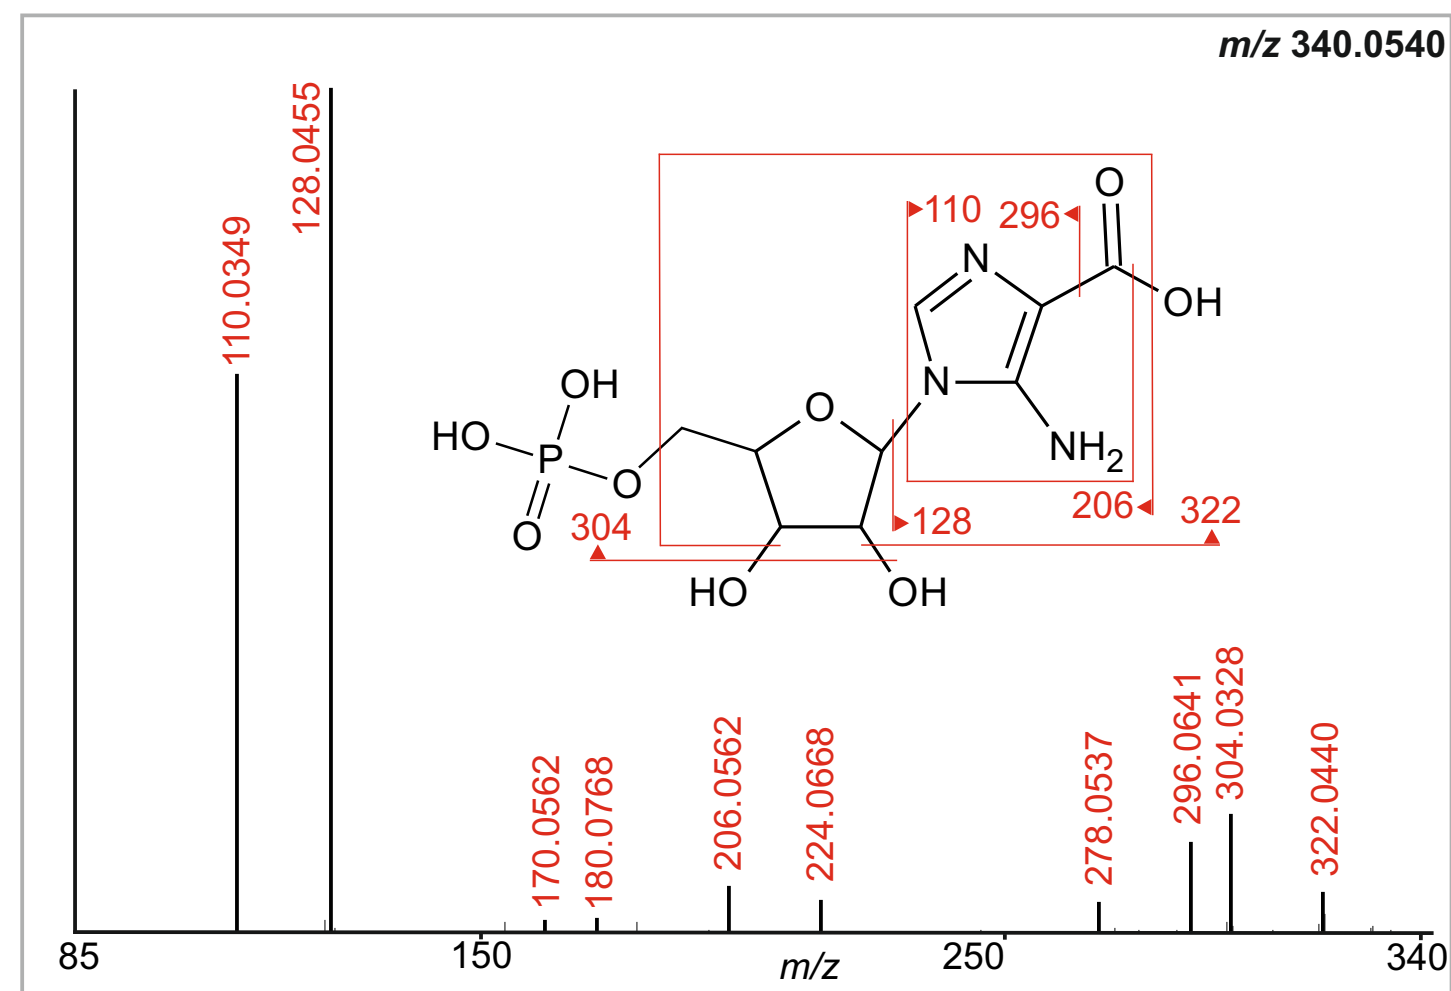

MS<sup>3</sup>

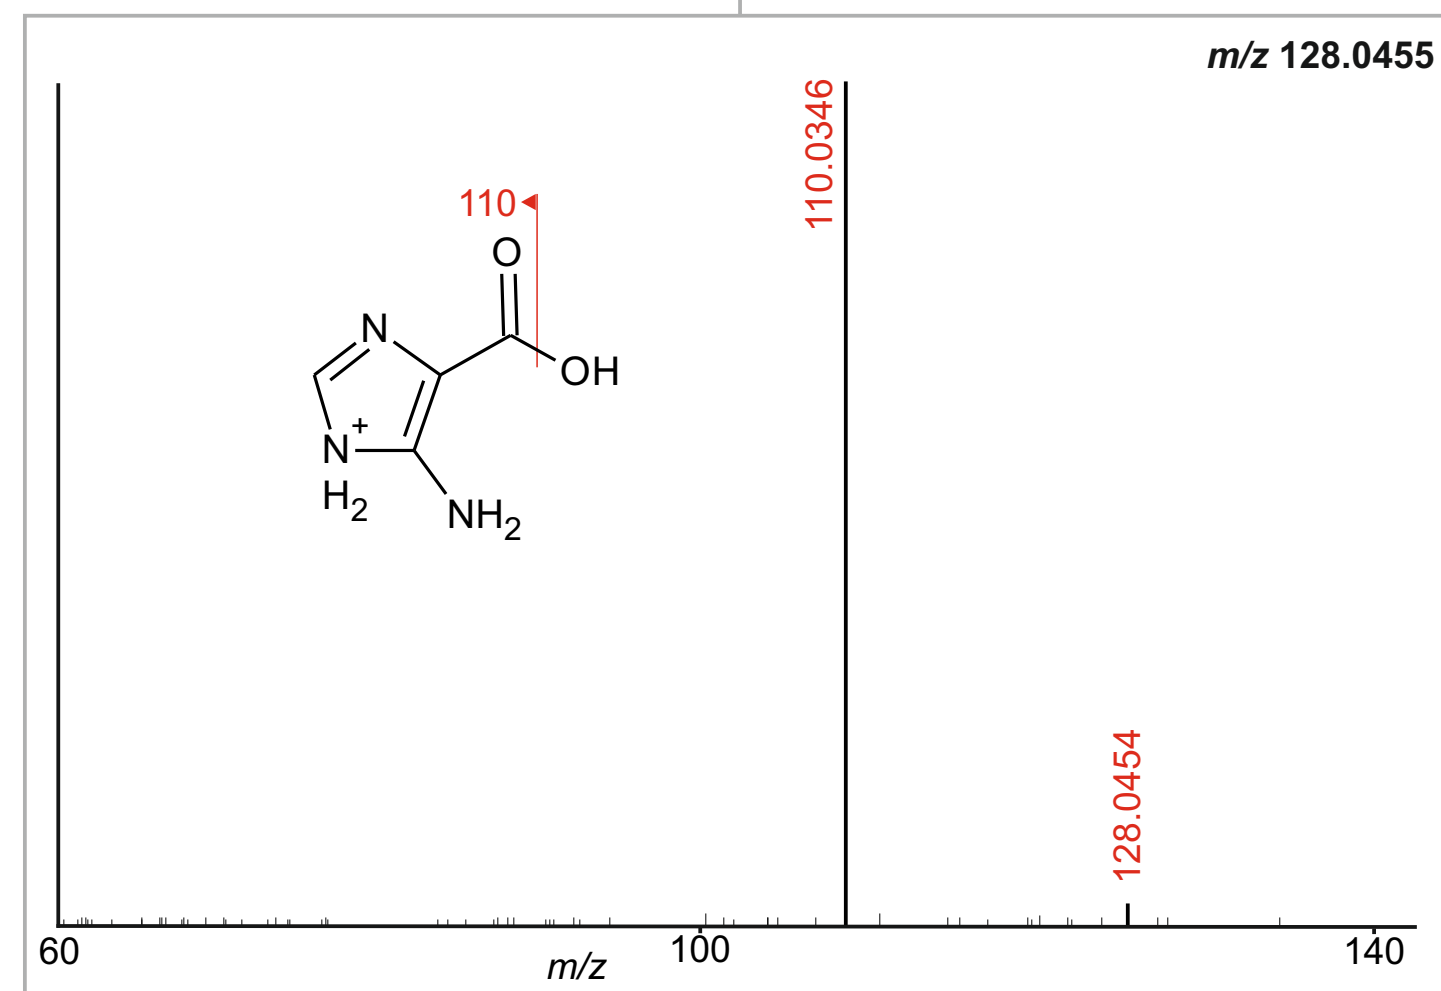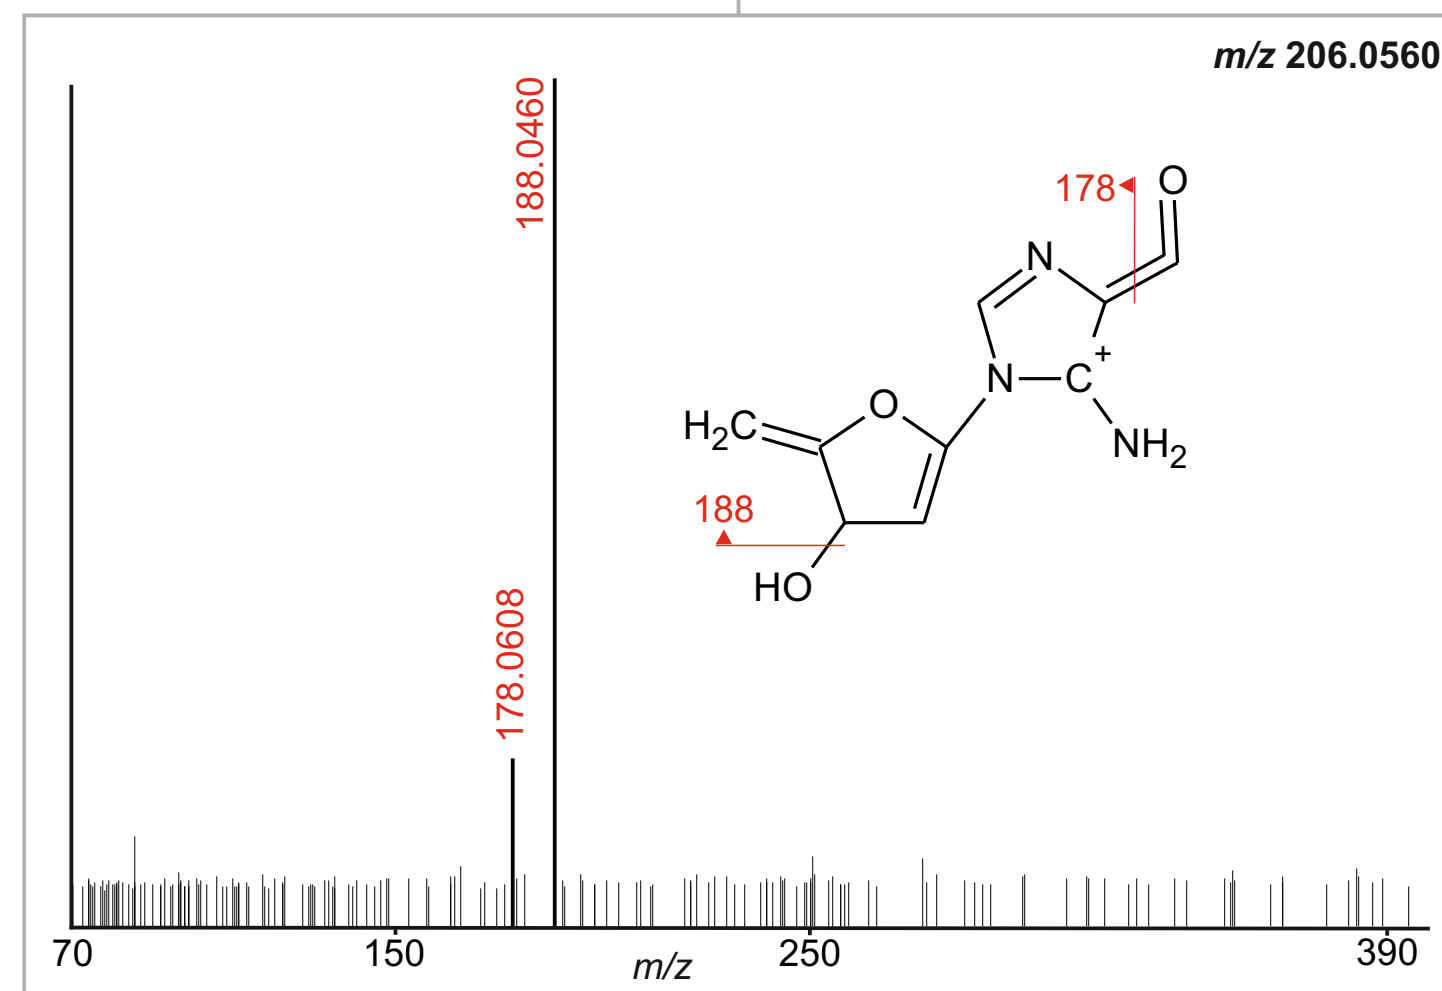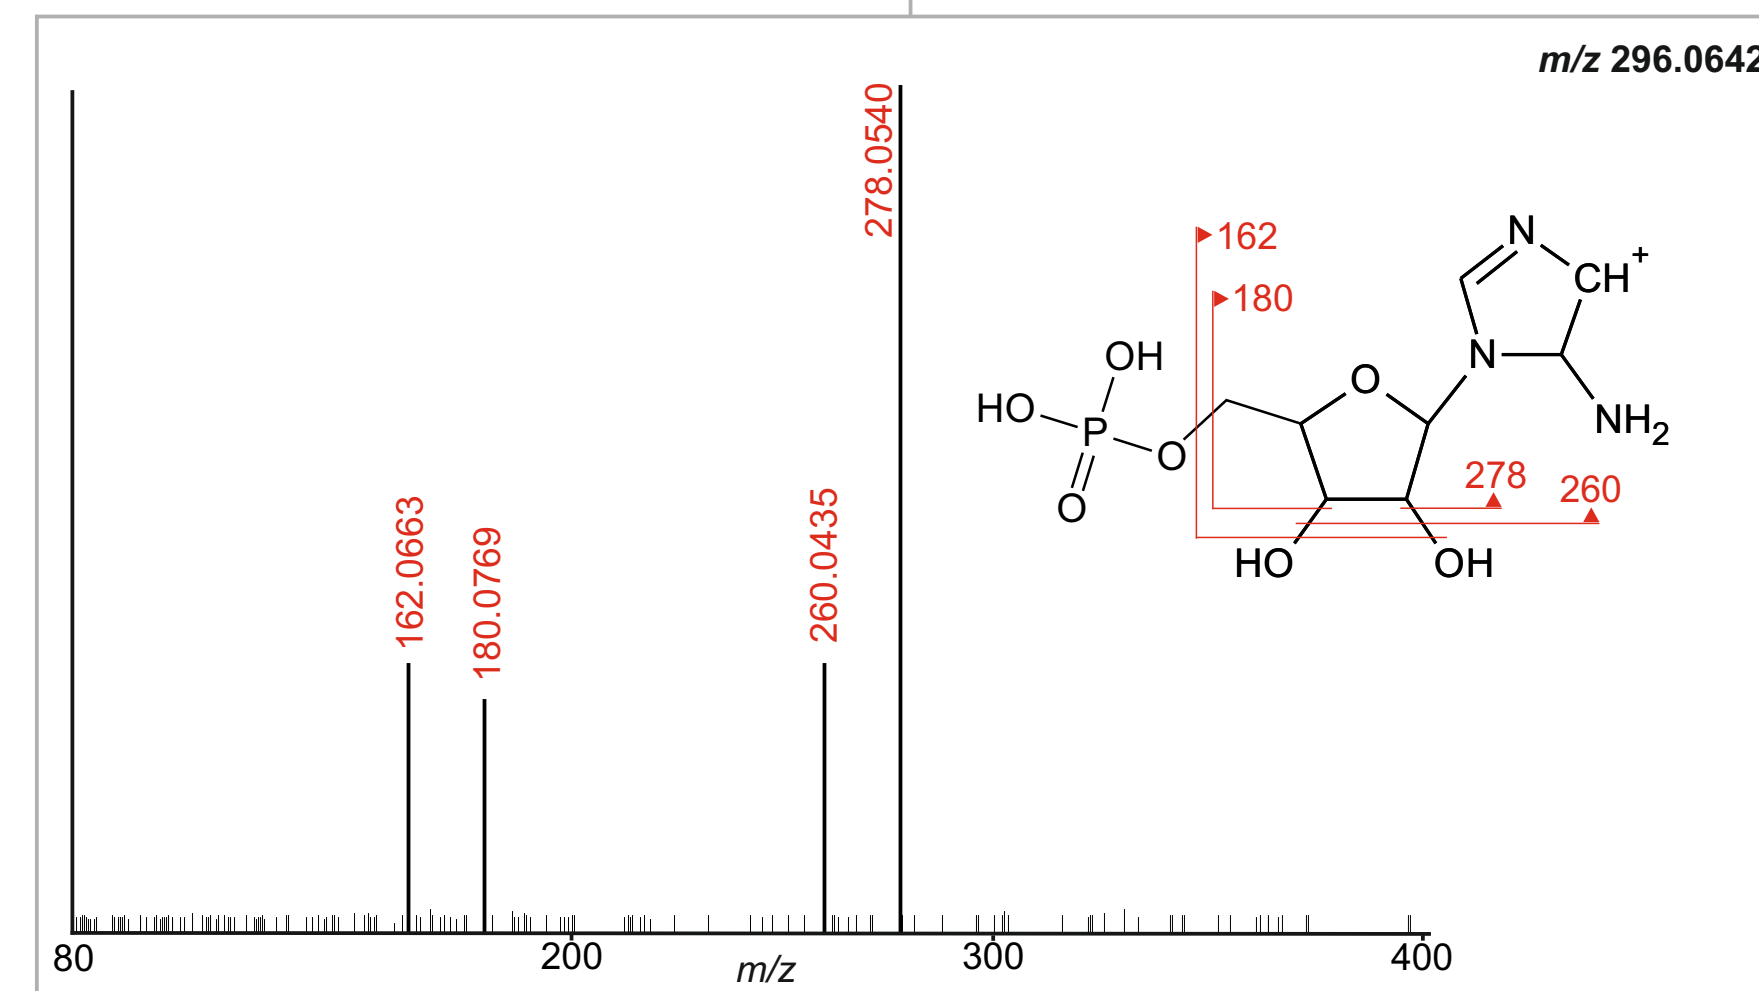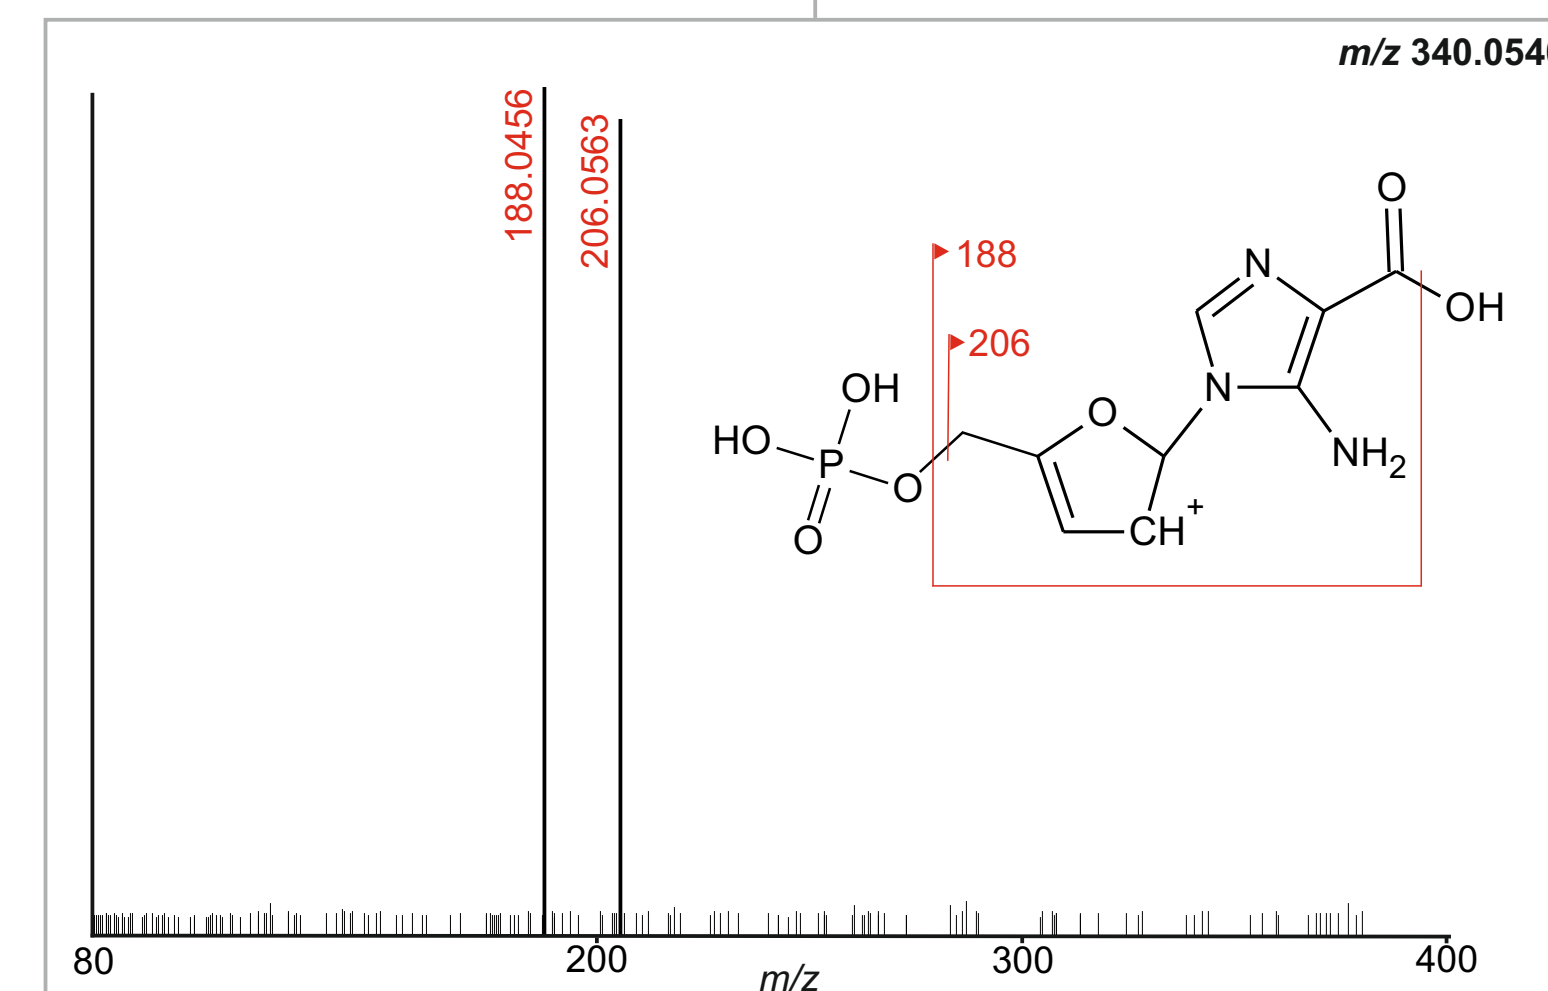

SAICAr

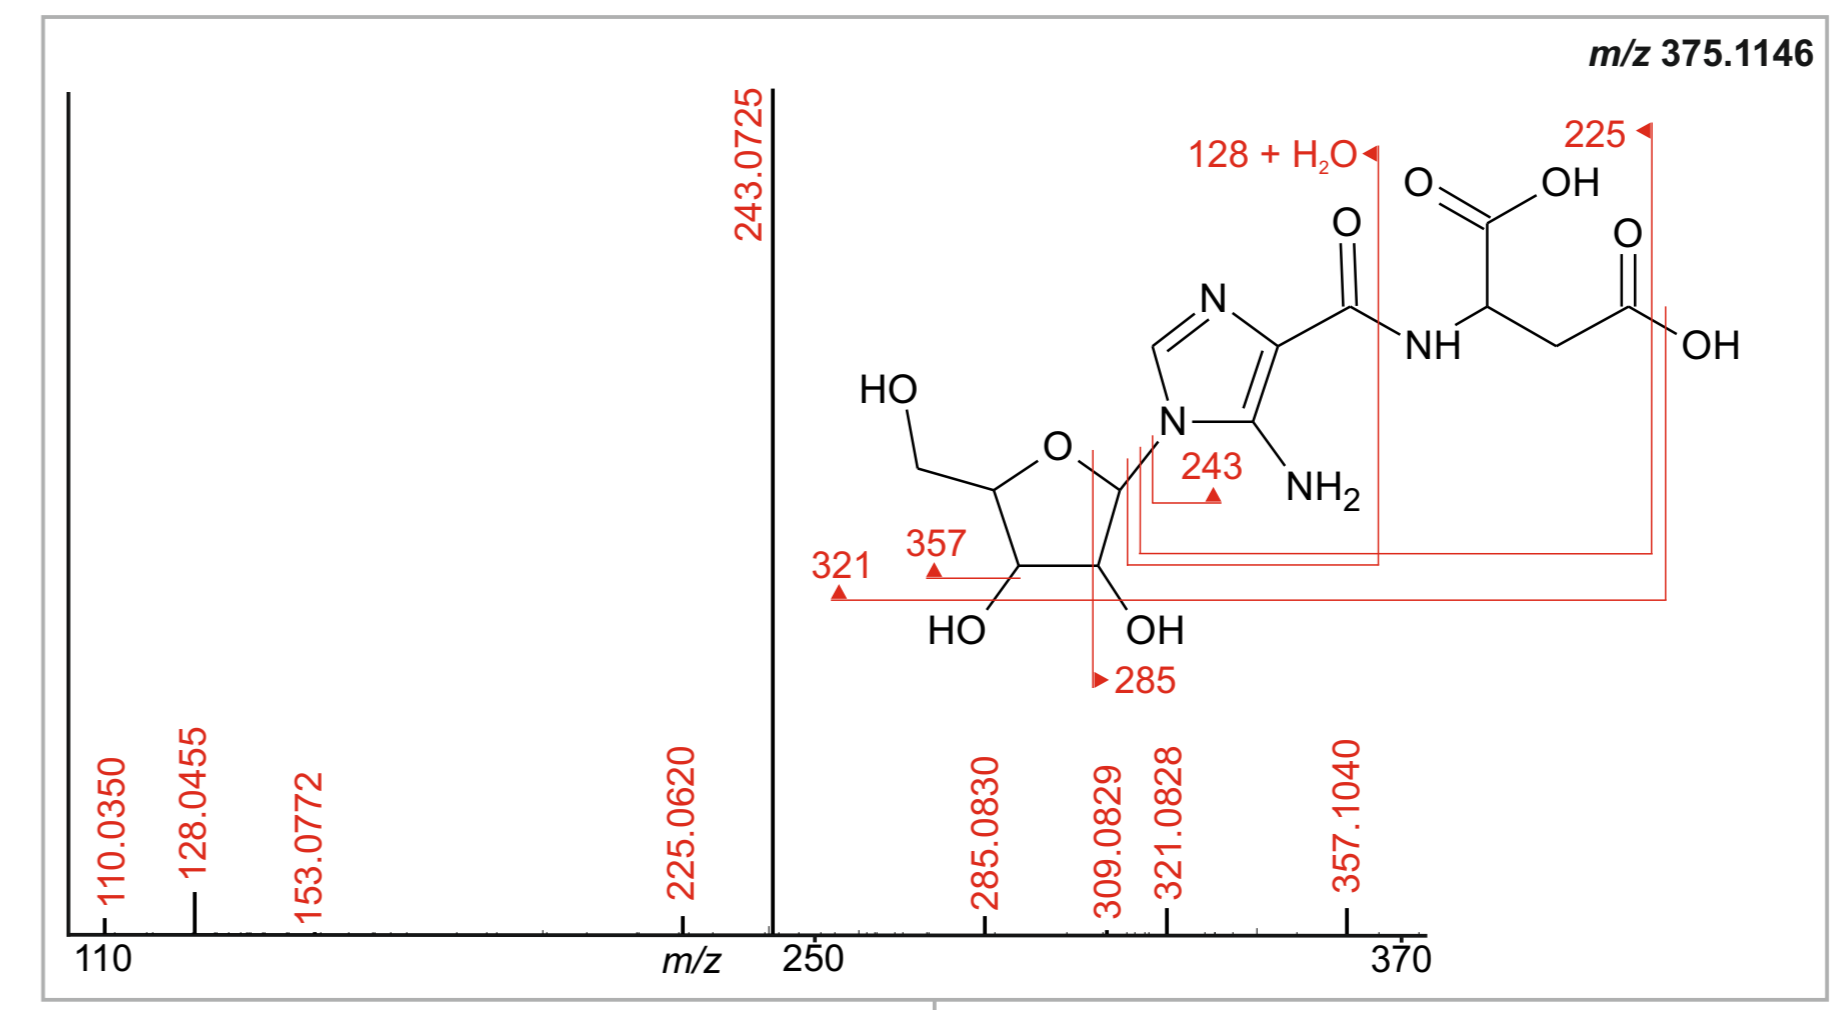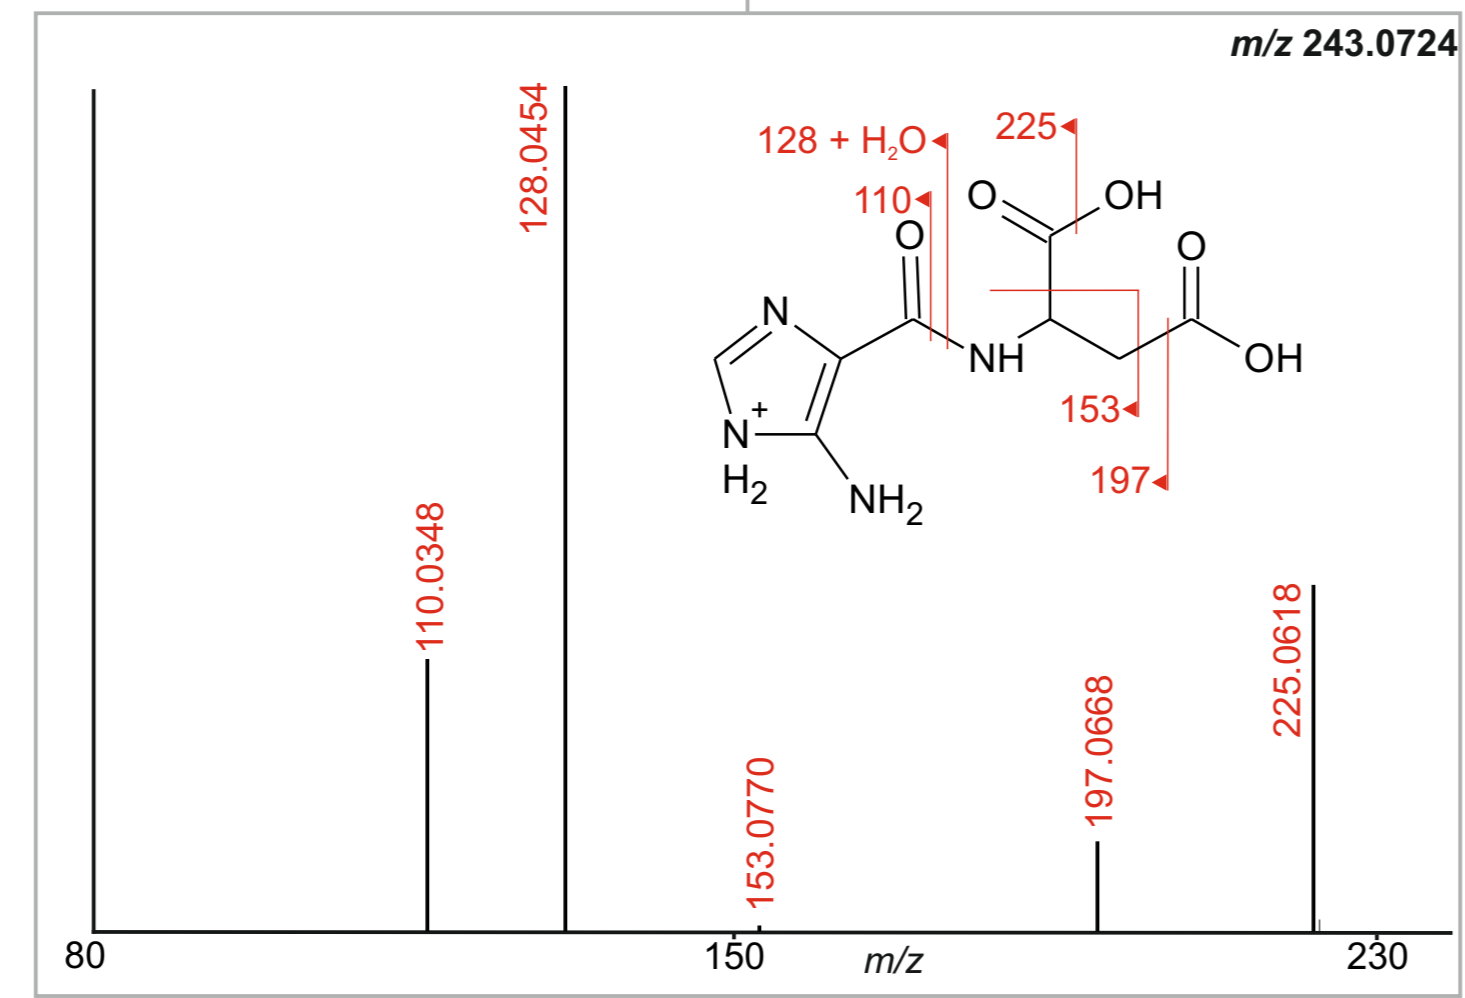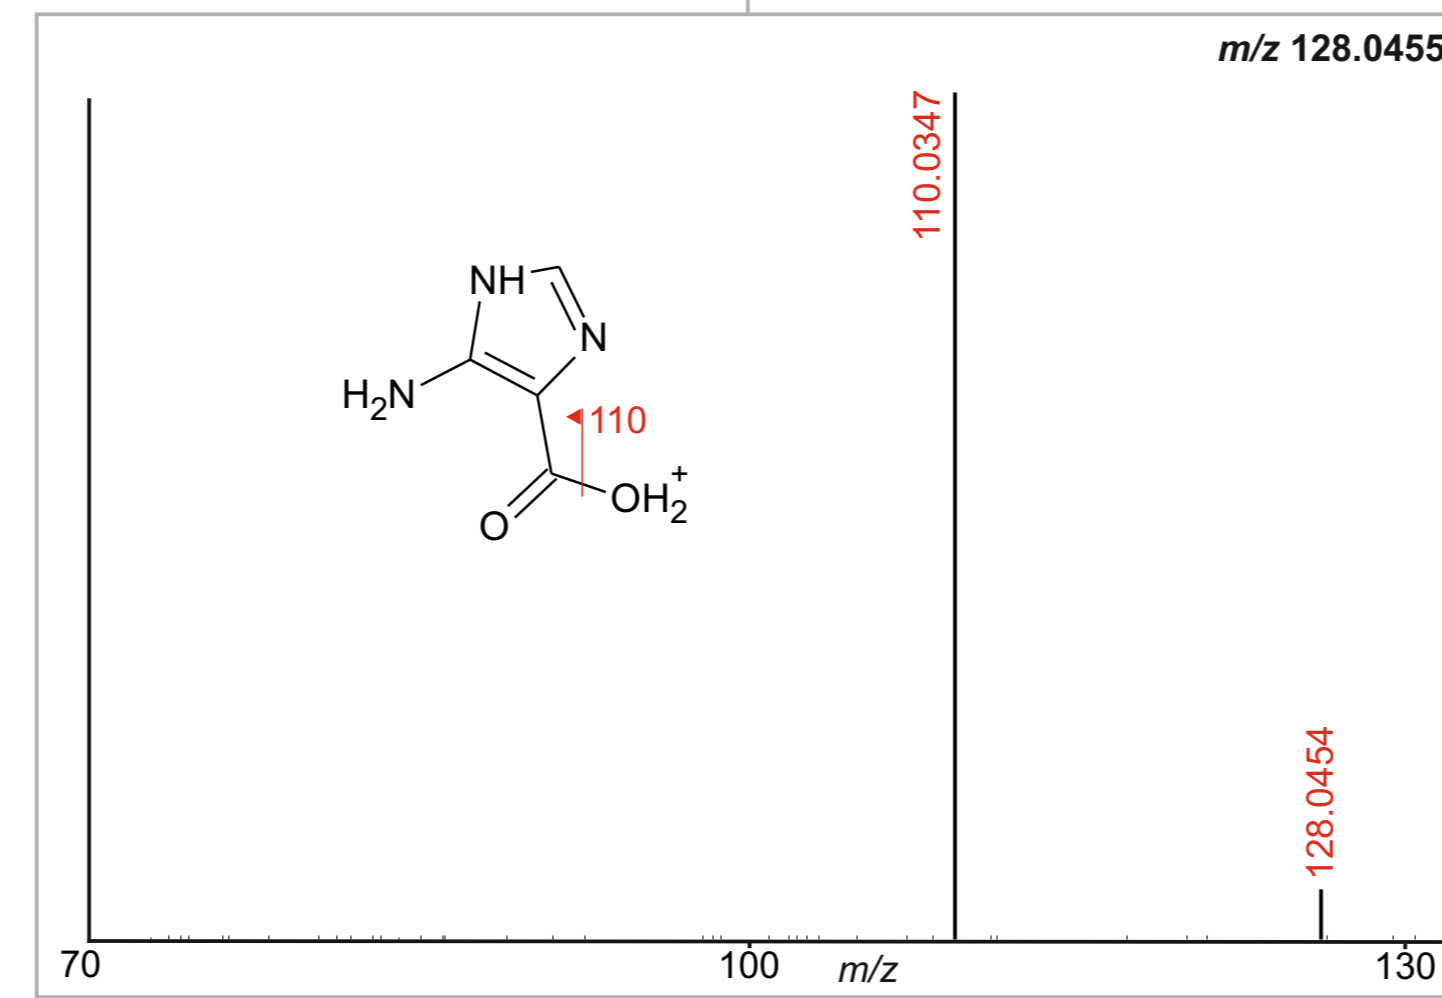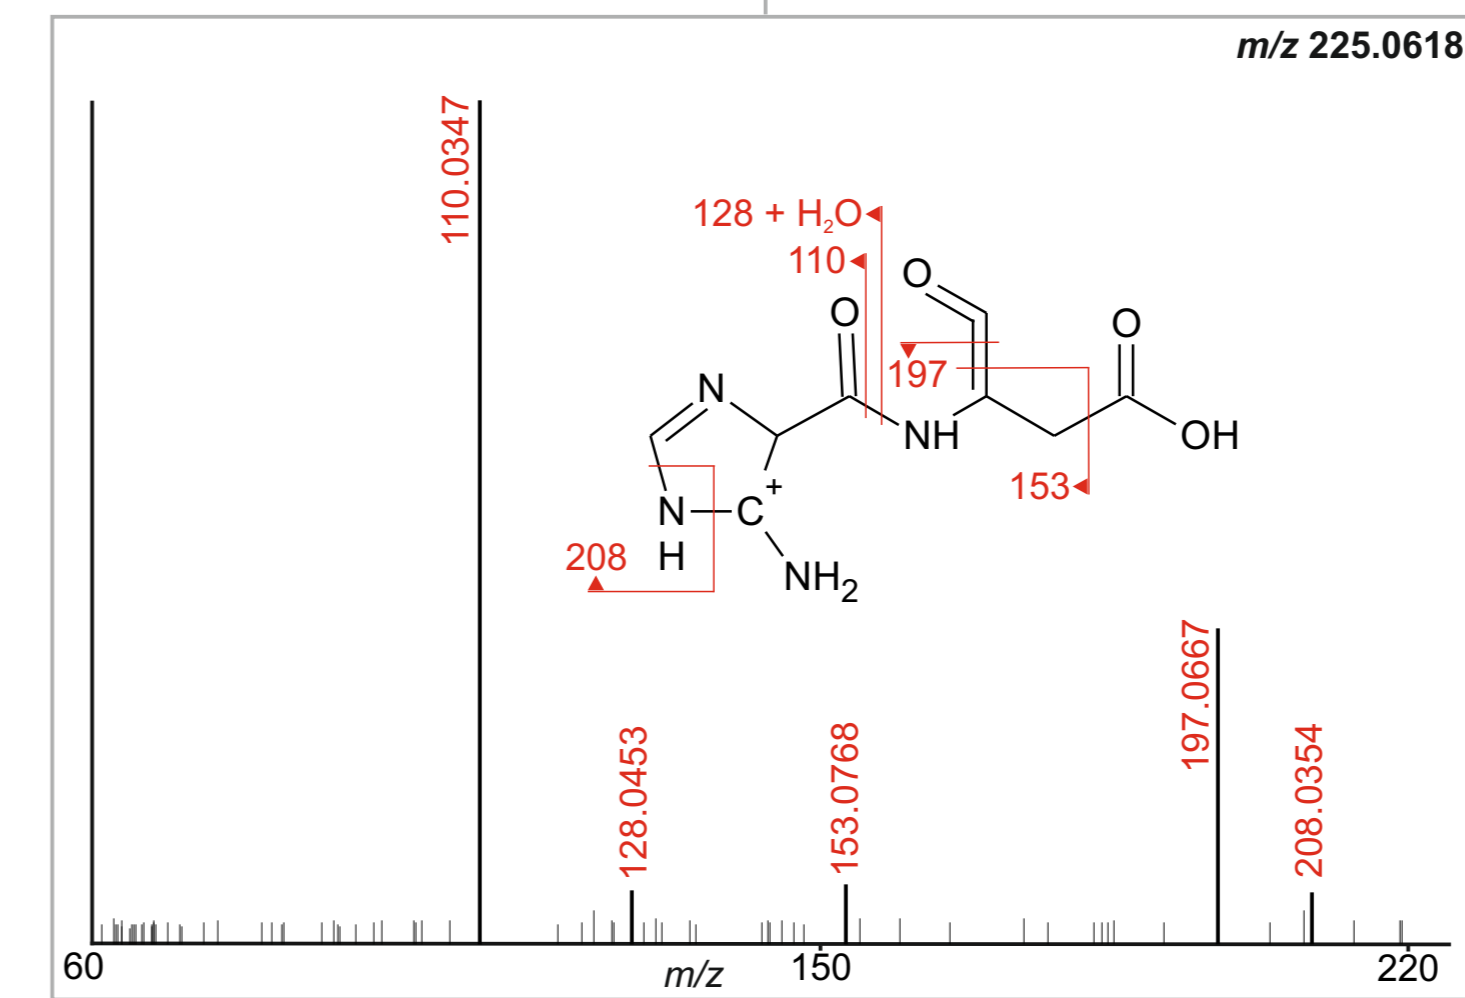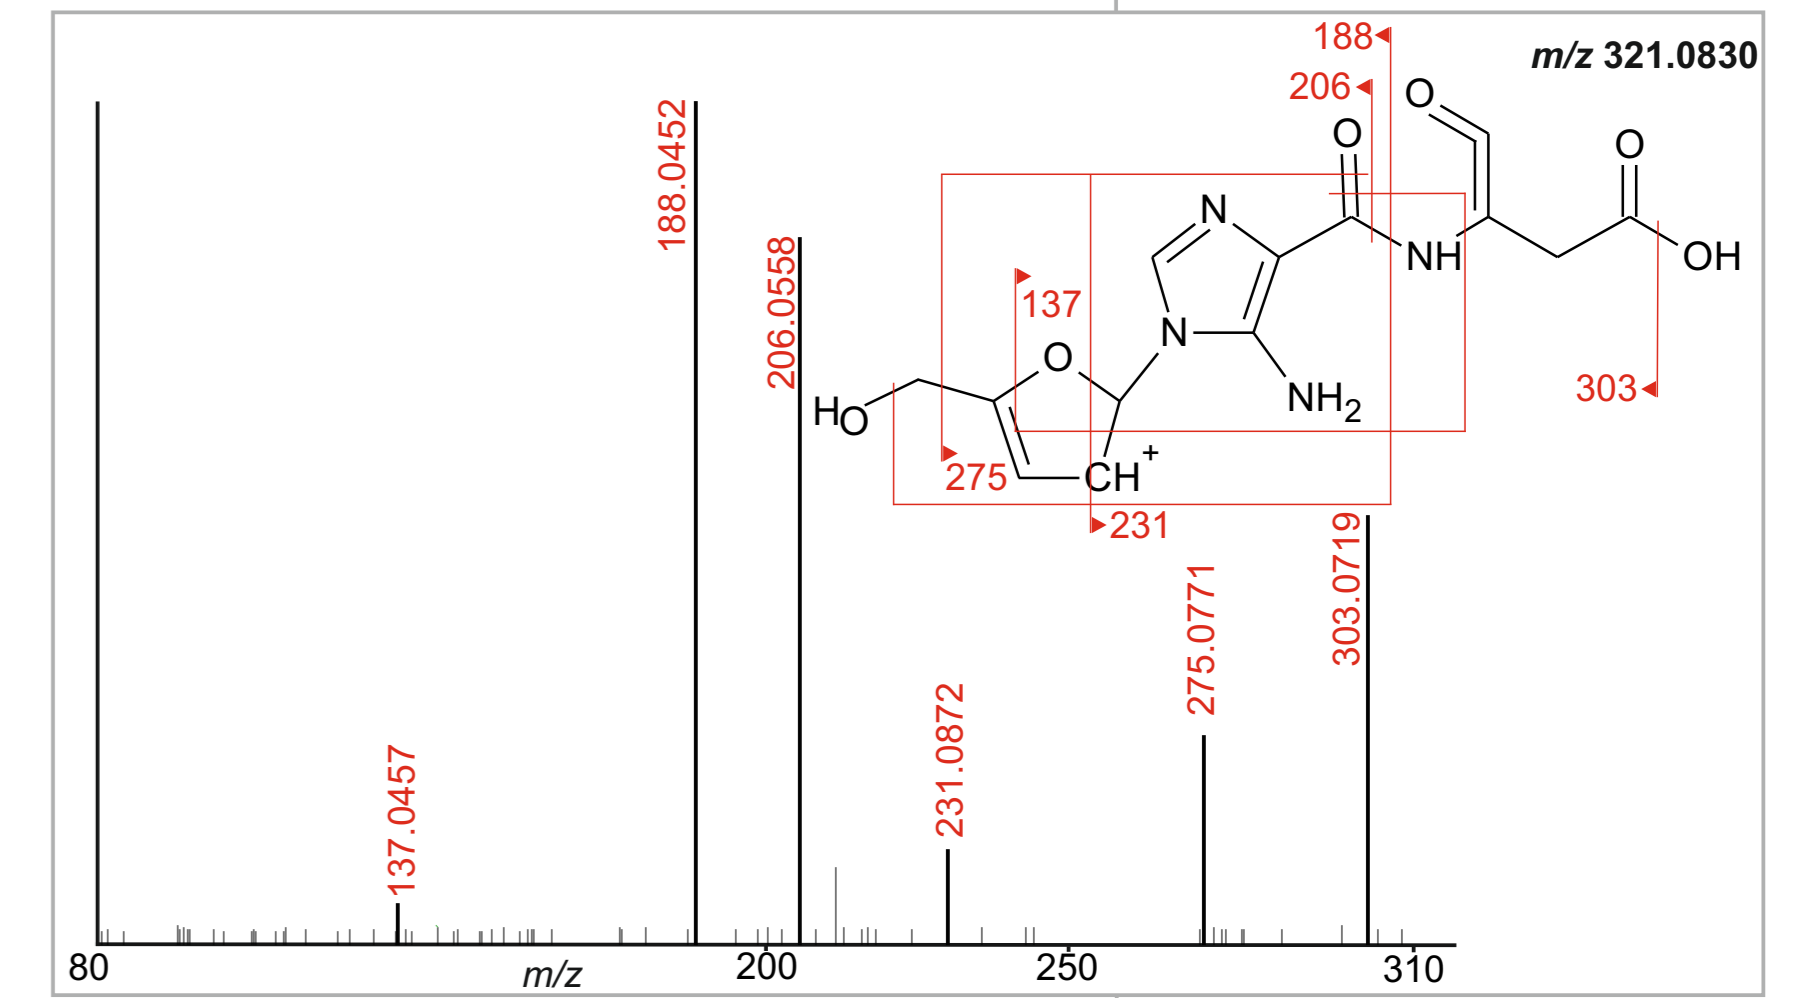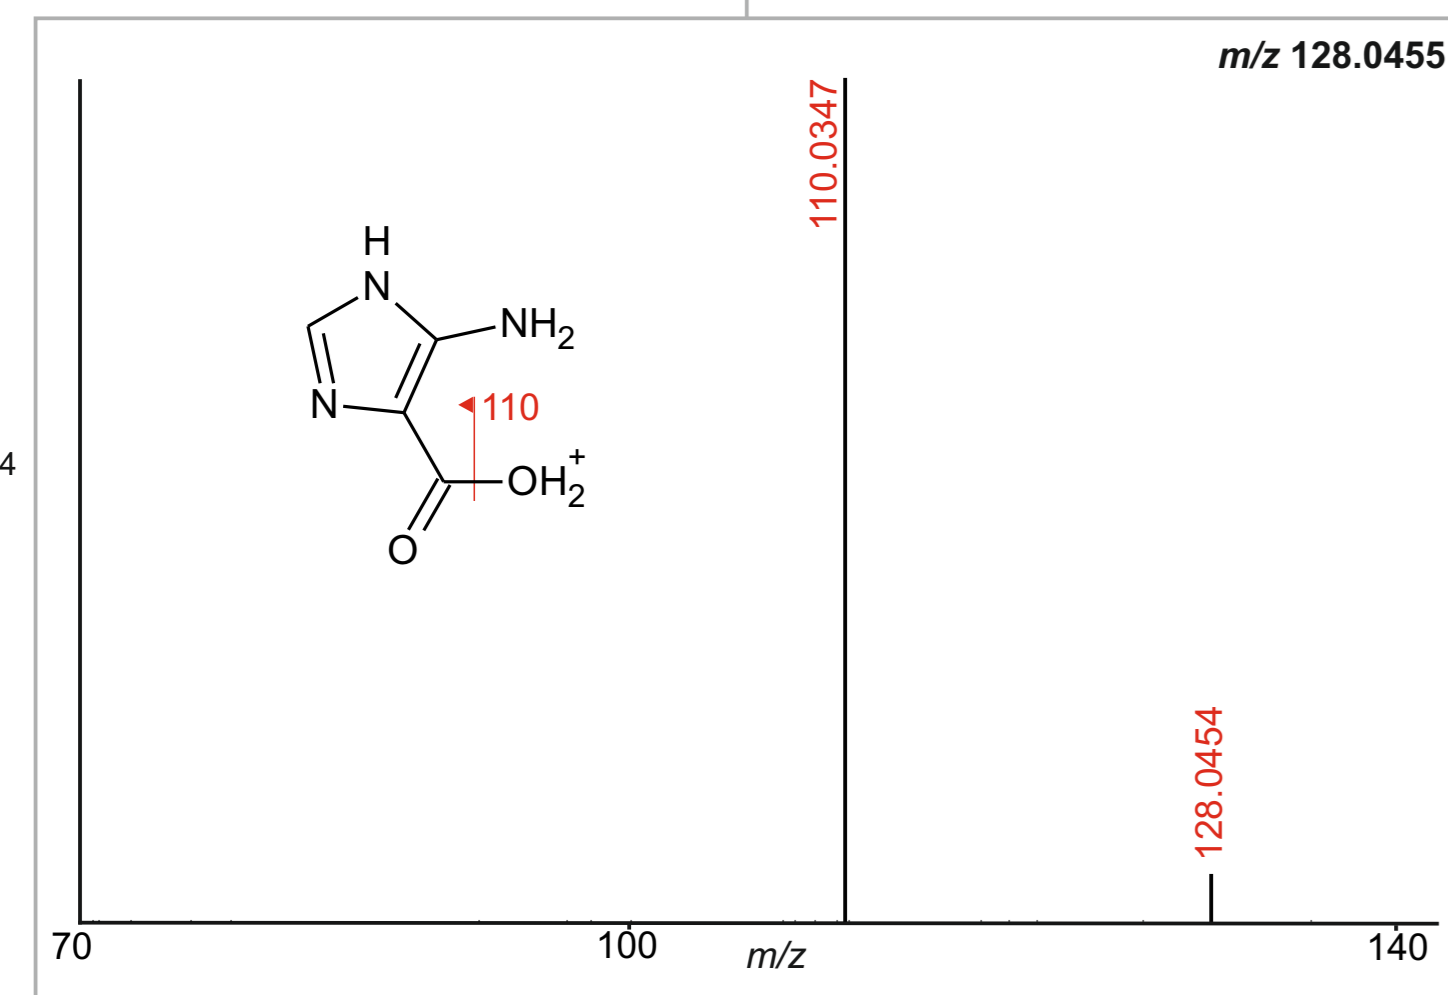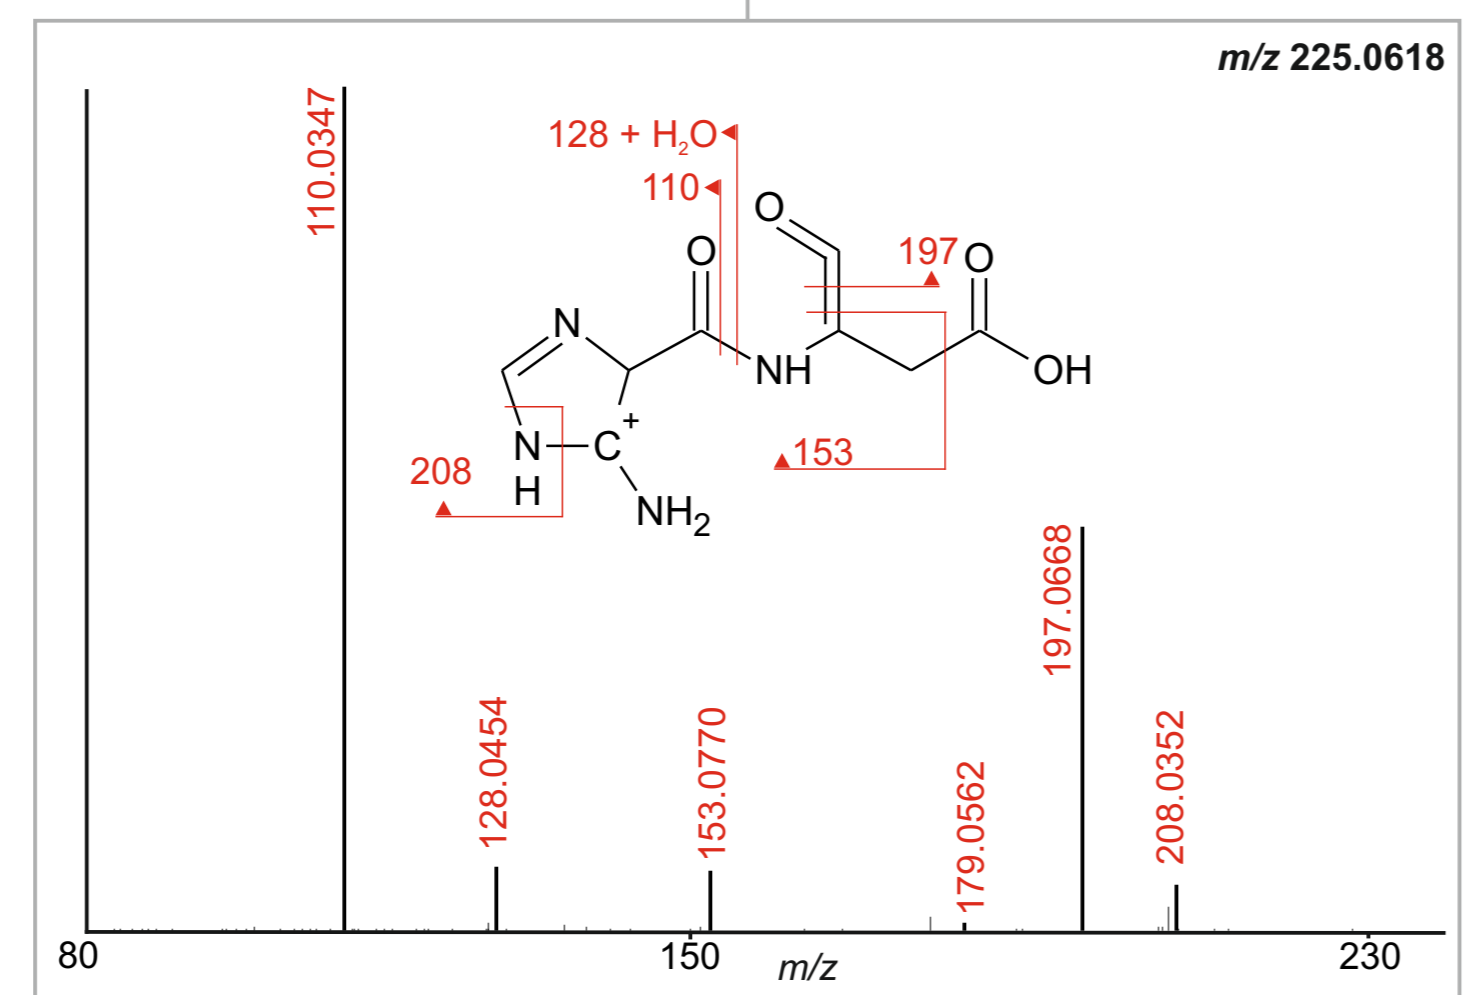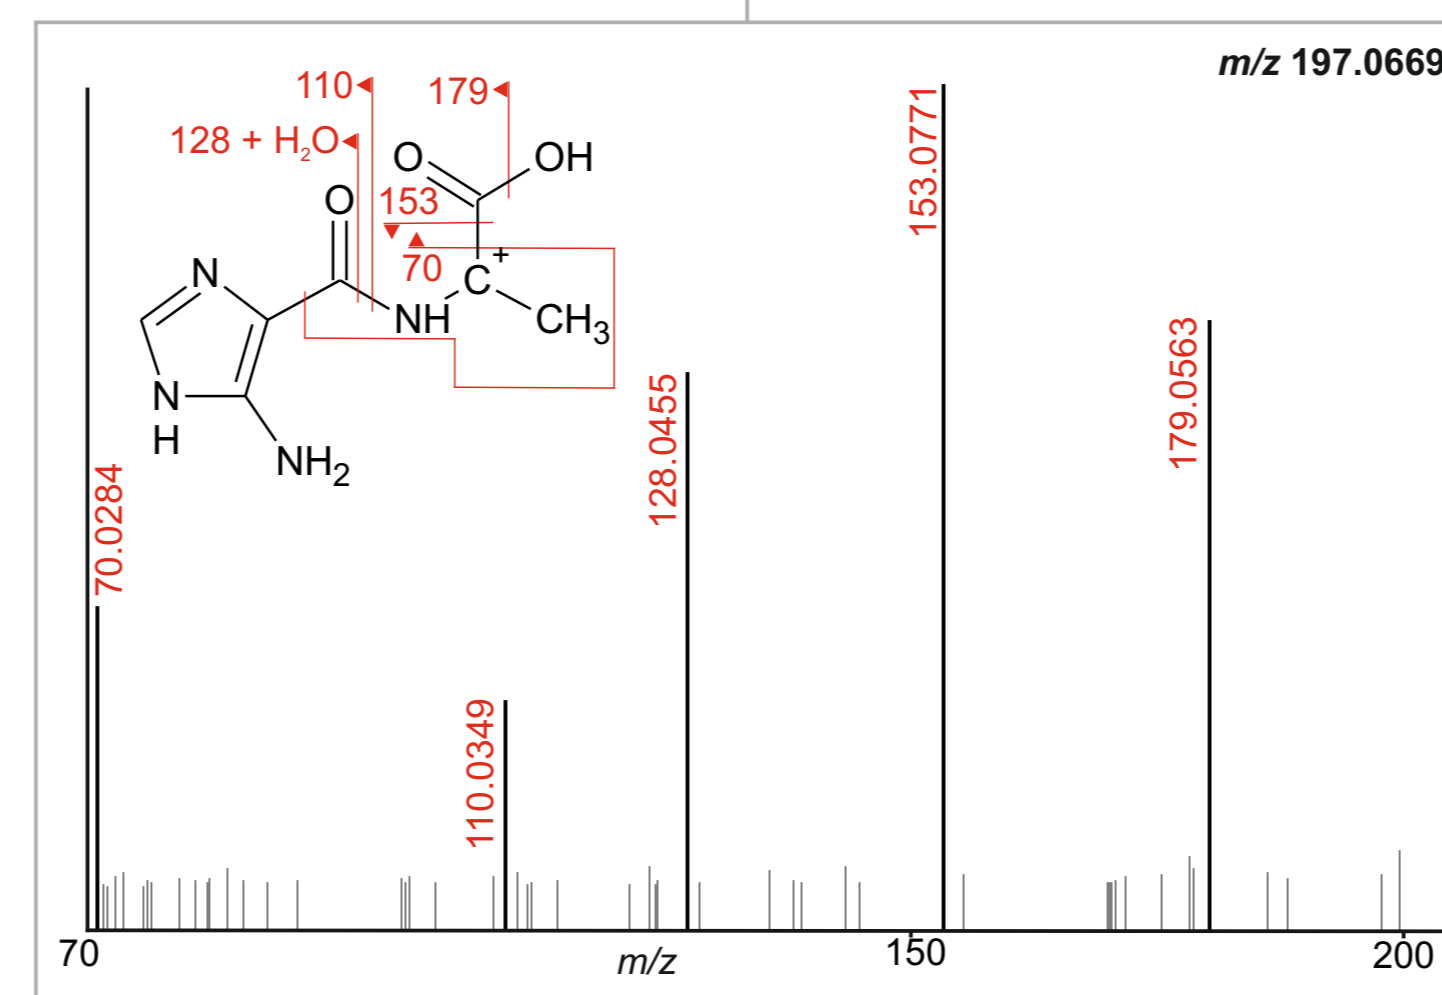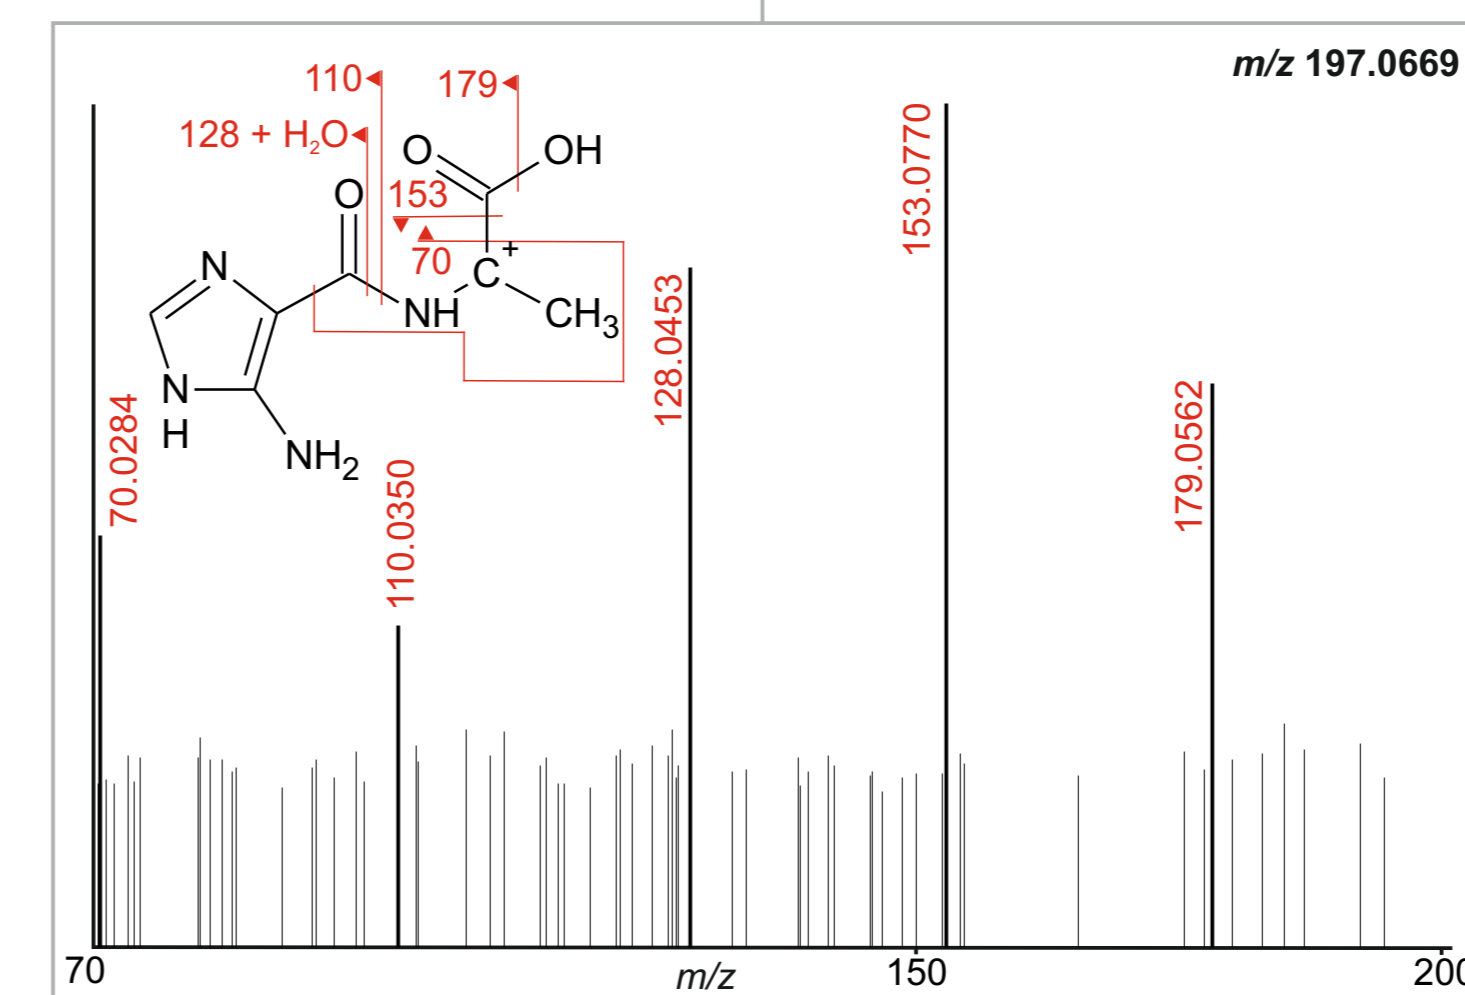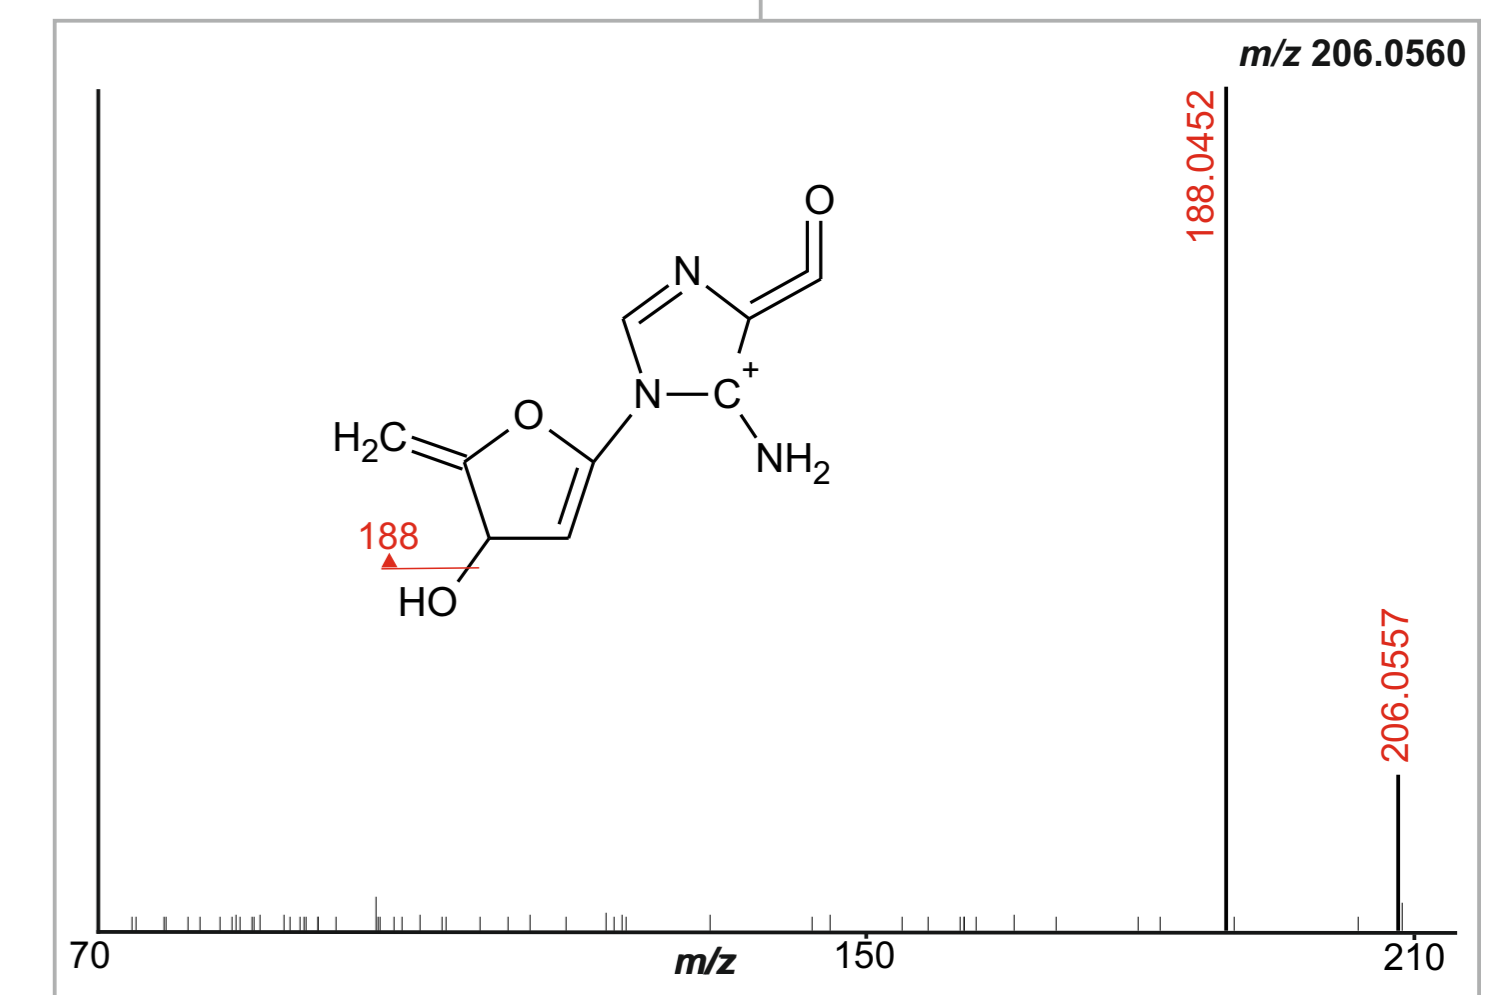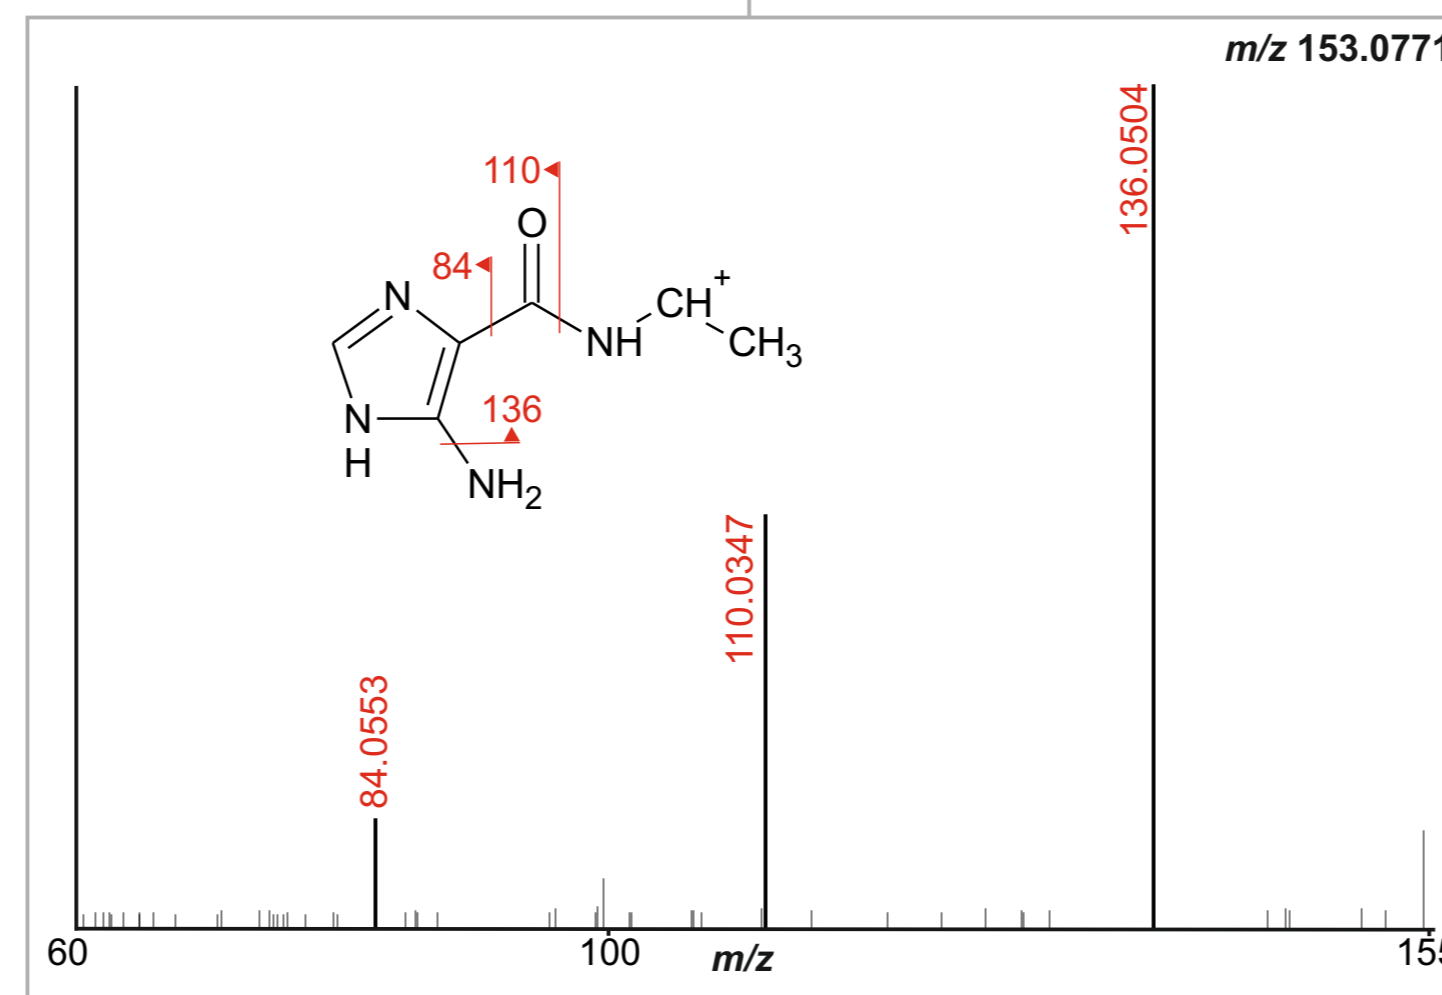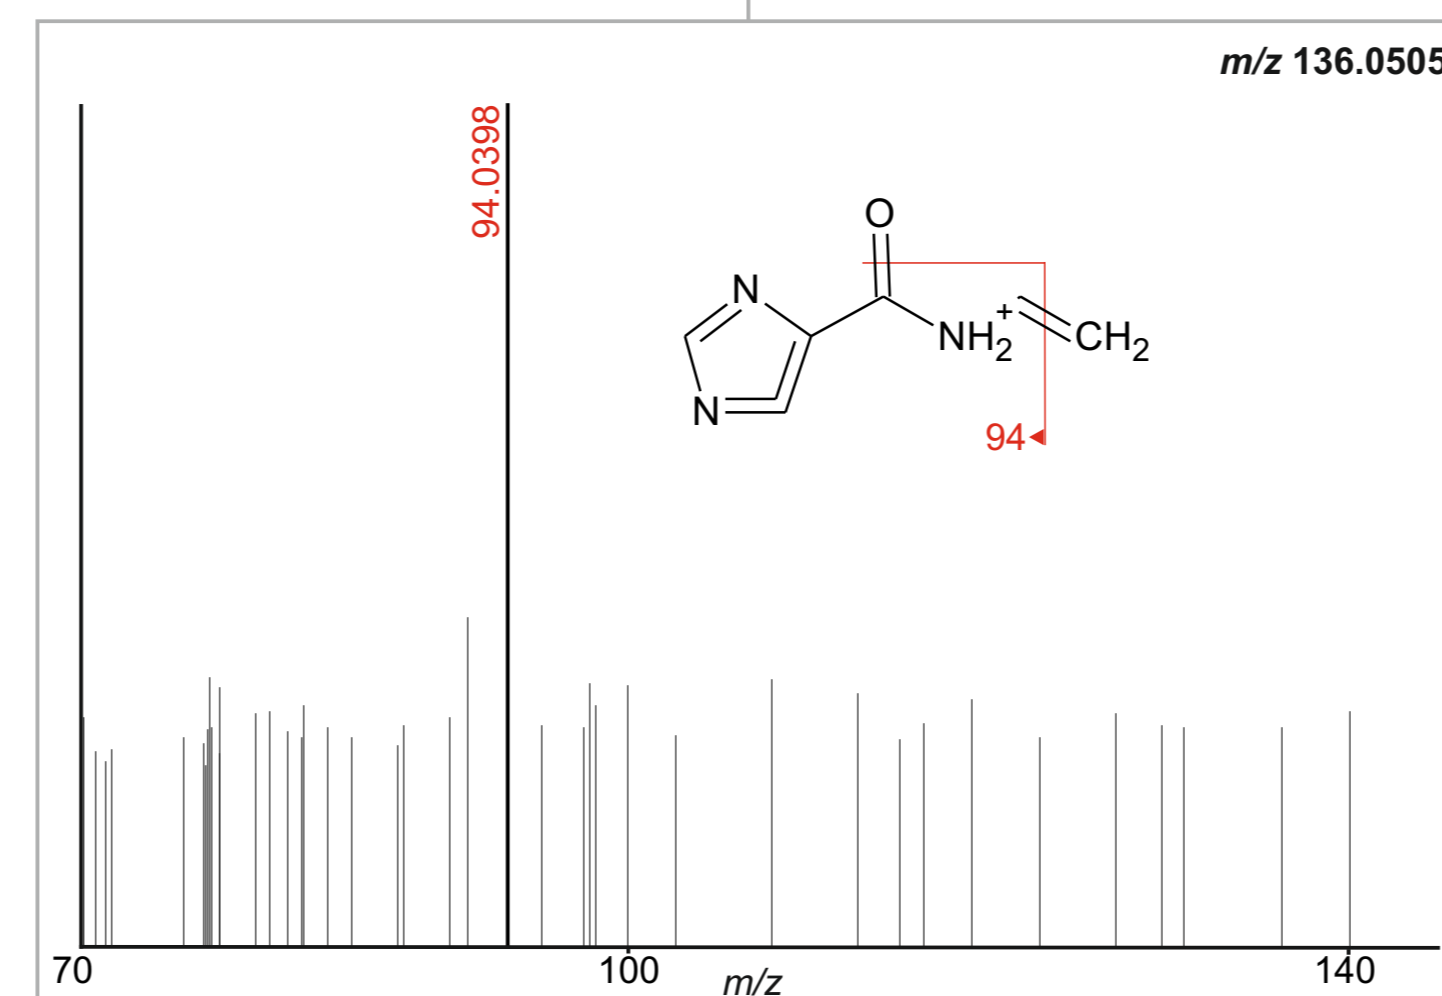

MS<sup>2</sup>

MS<sup>3</sup>

MS<sup>4</sup>

MS<sup>5</sup>

MS<sup>6</sup>

MS<sup>2</sup>

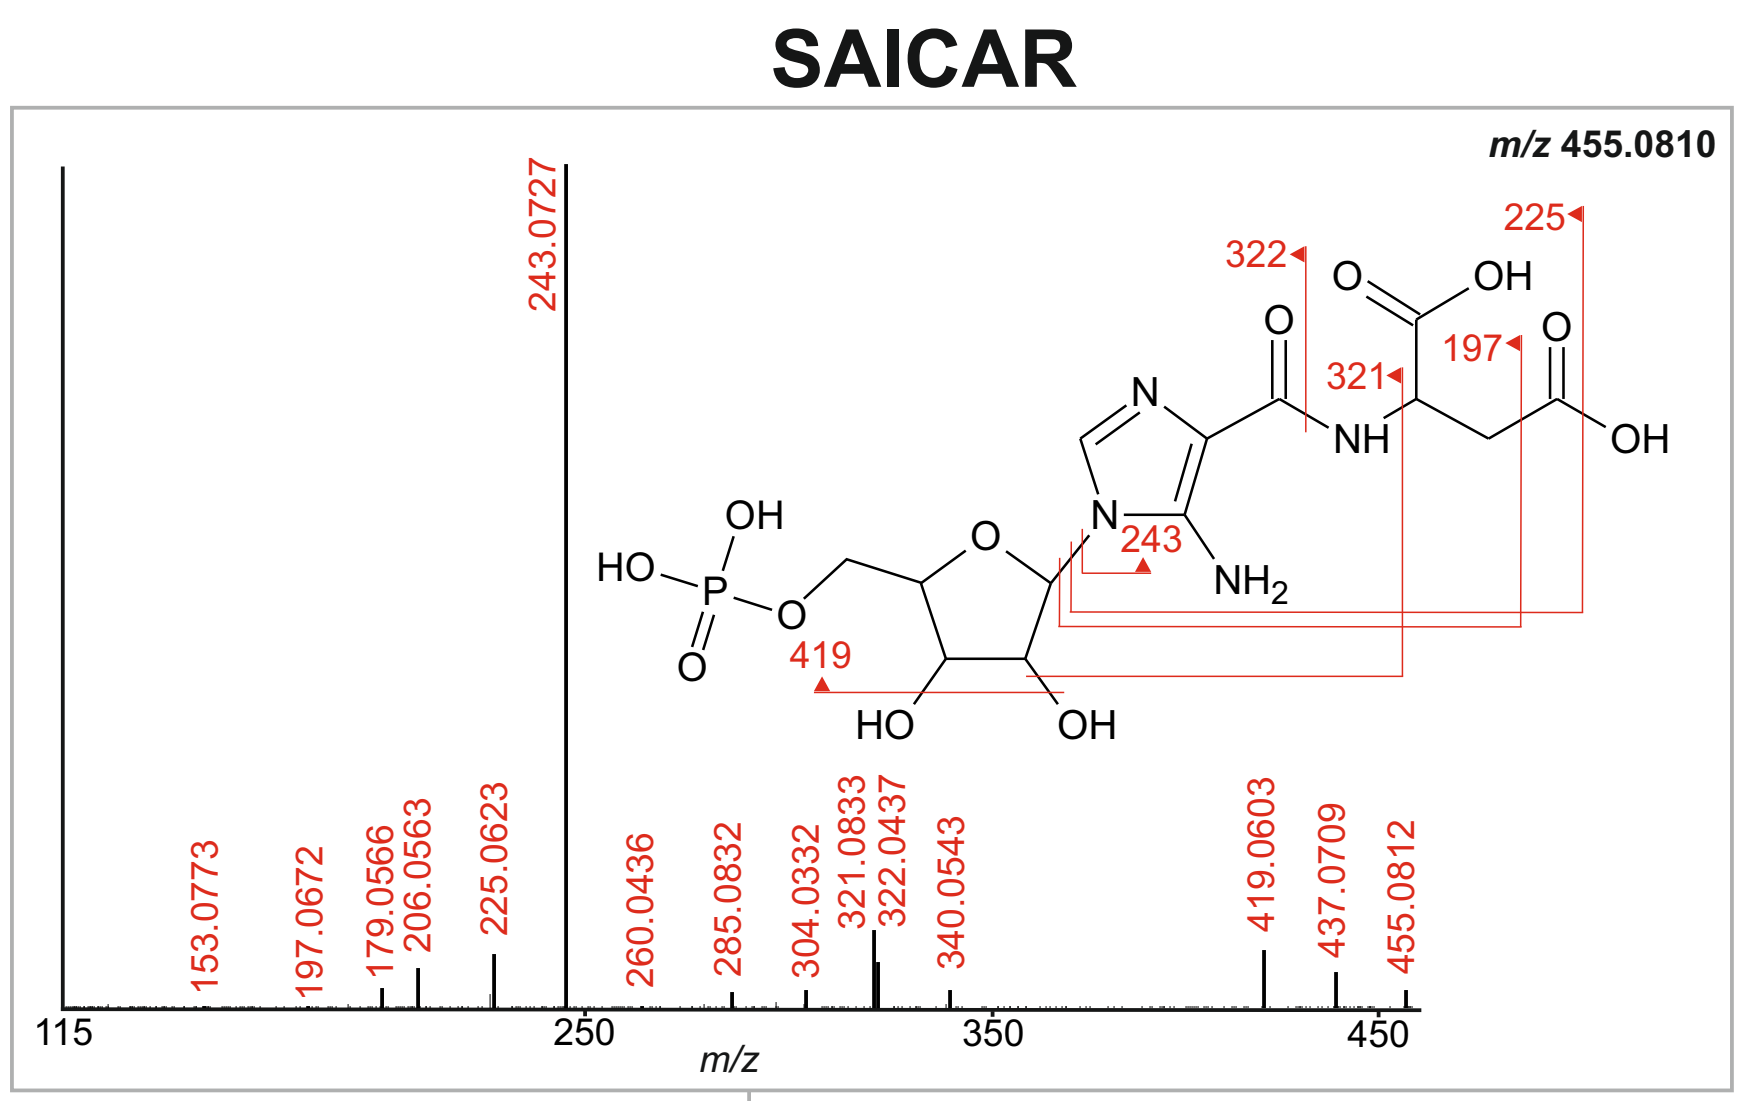

MS<sup>3</sup>

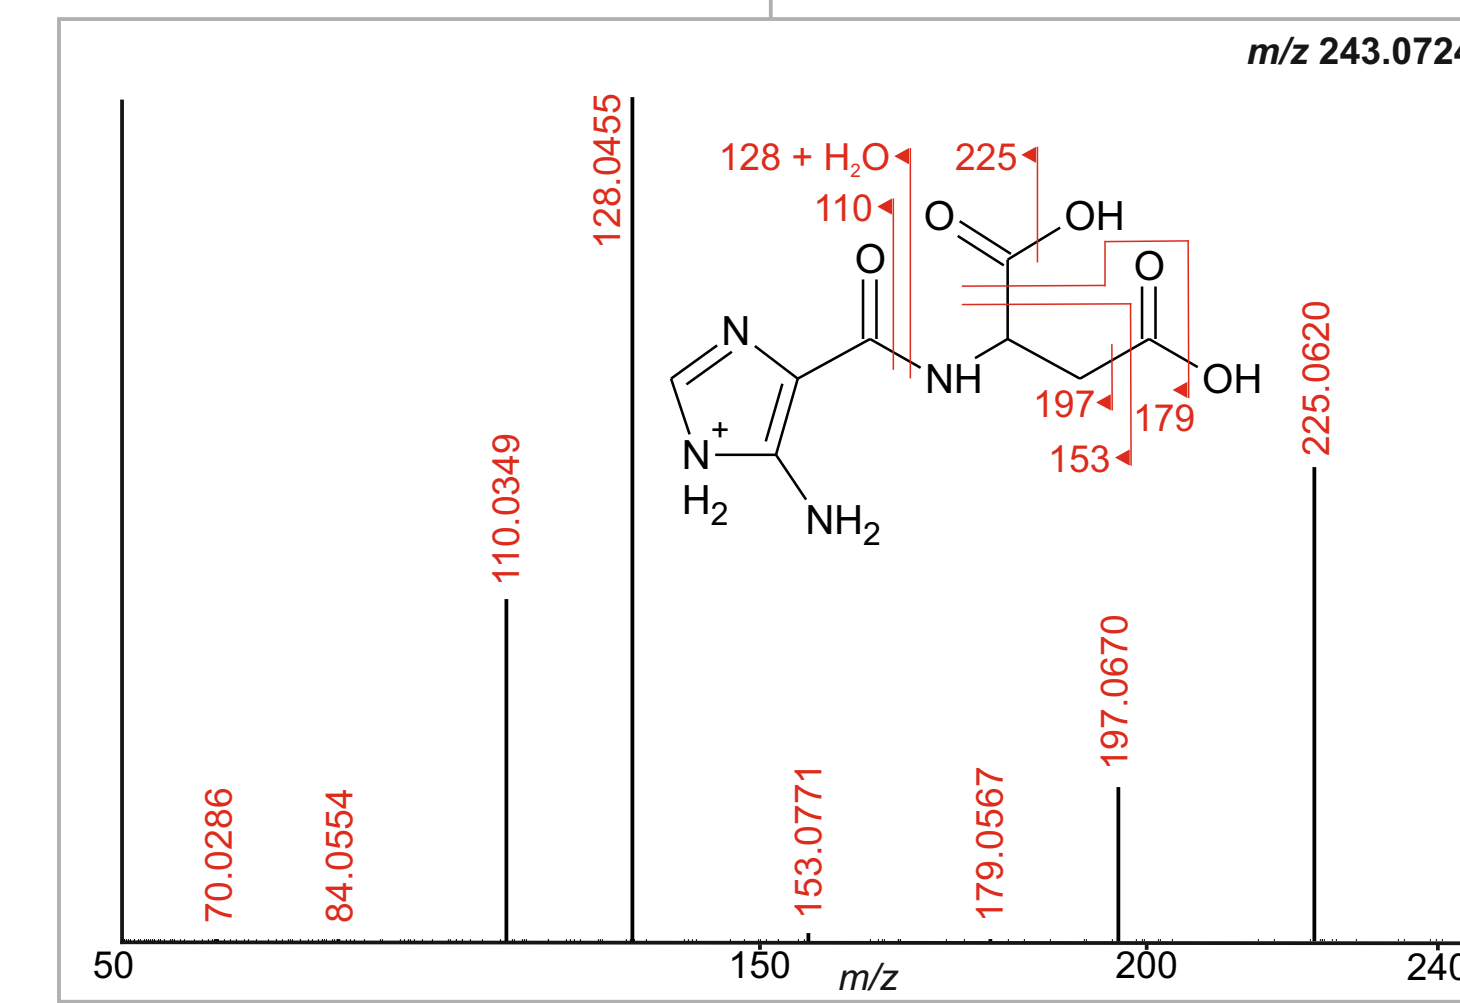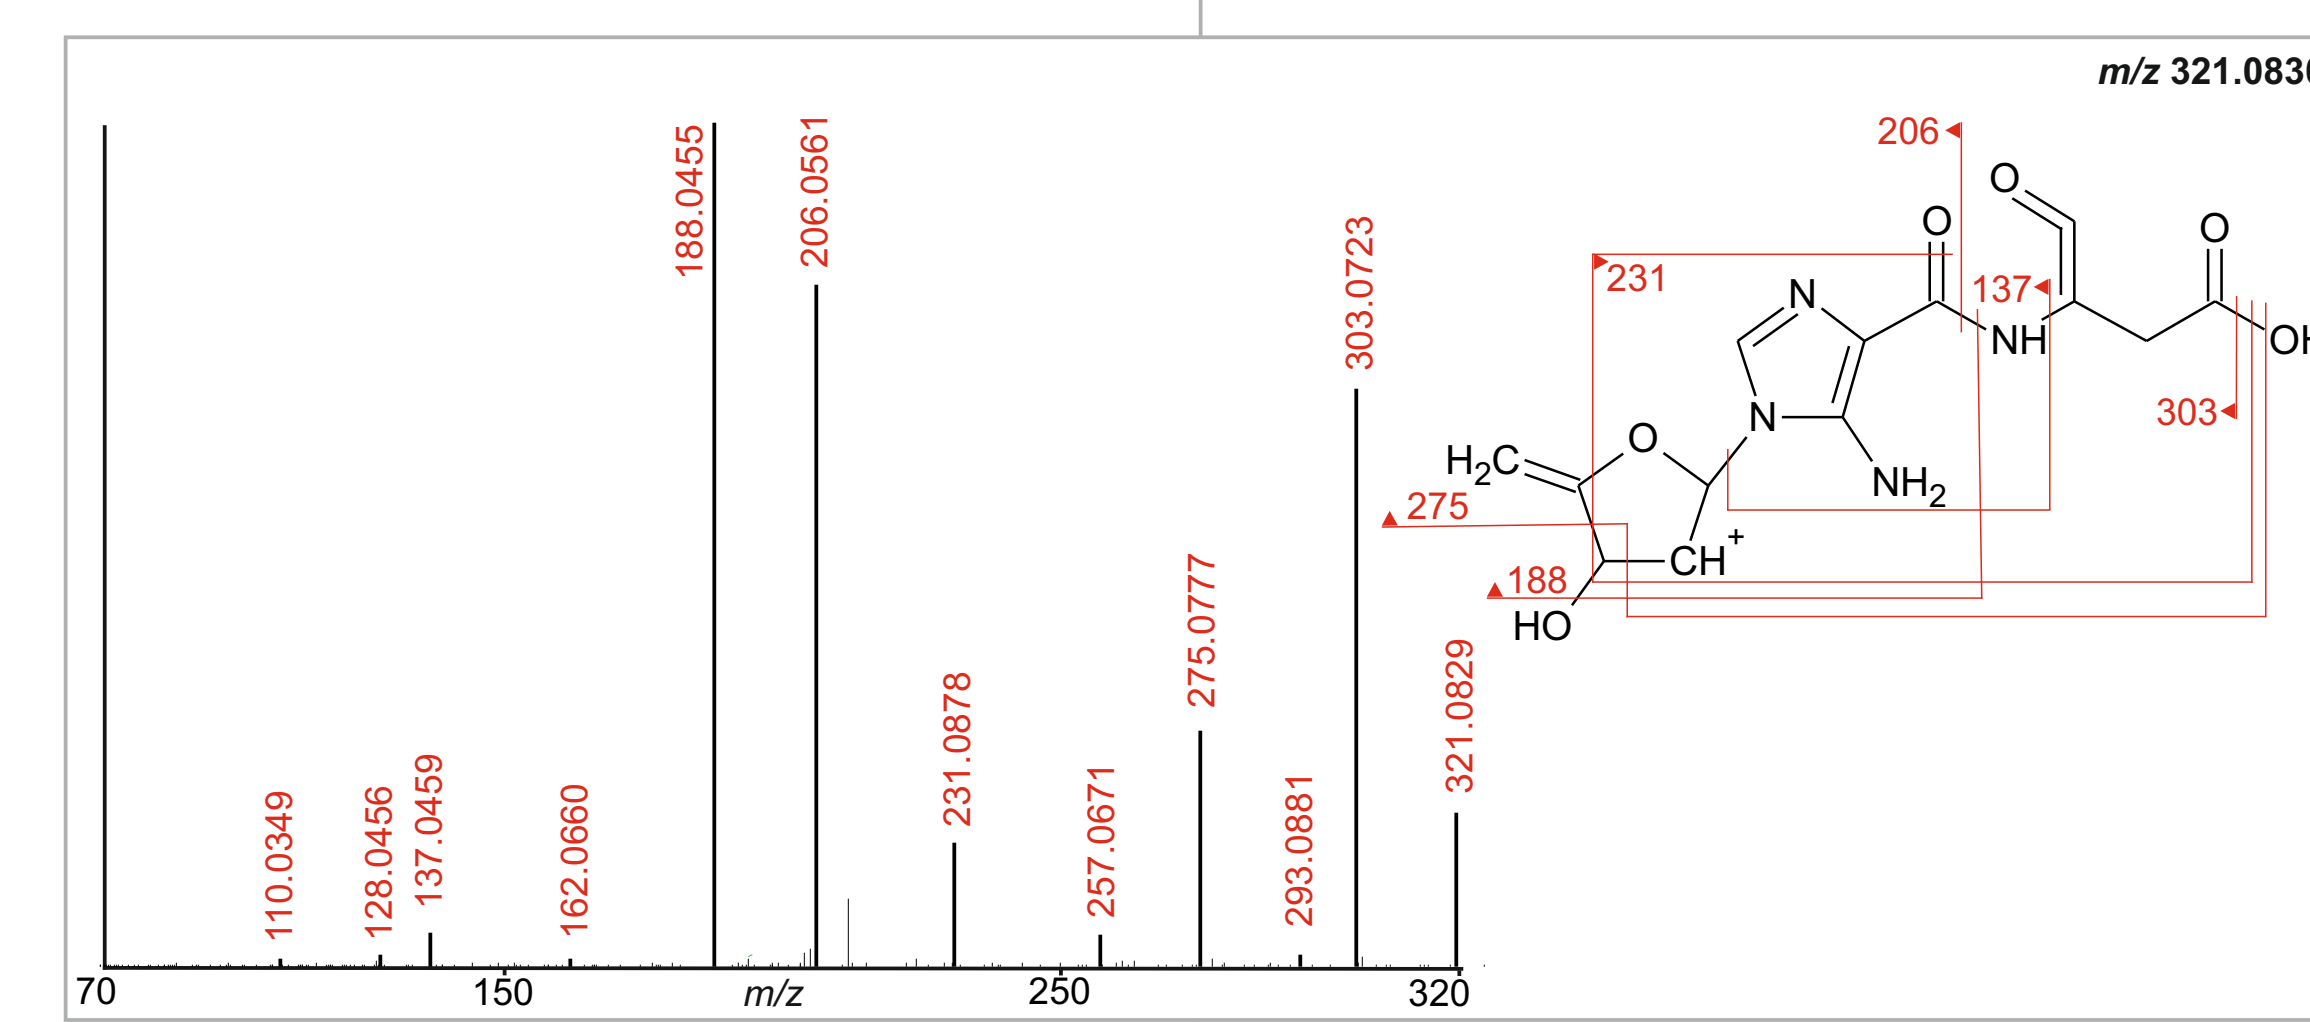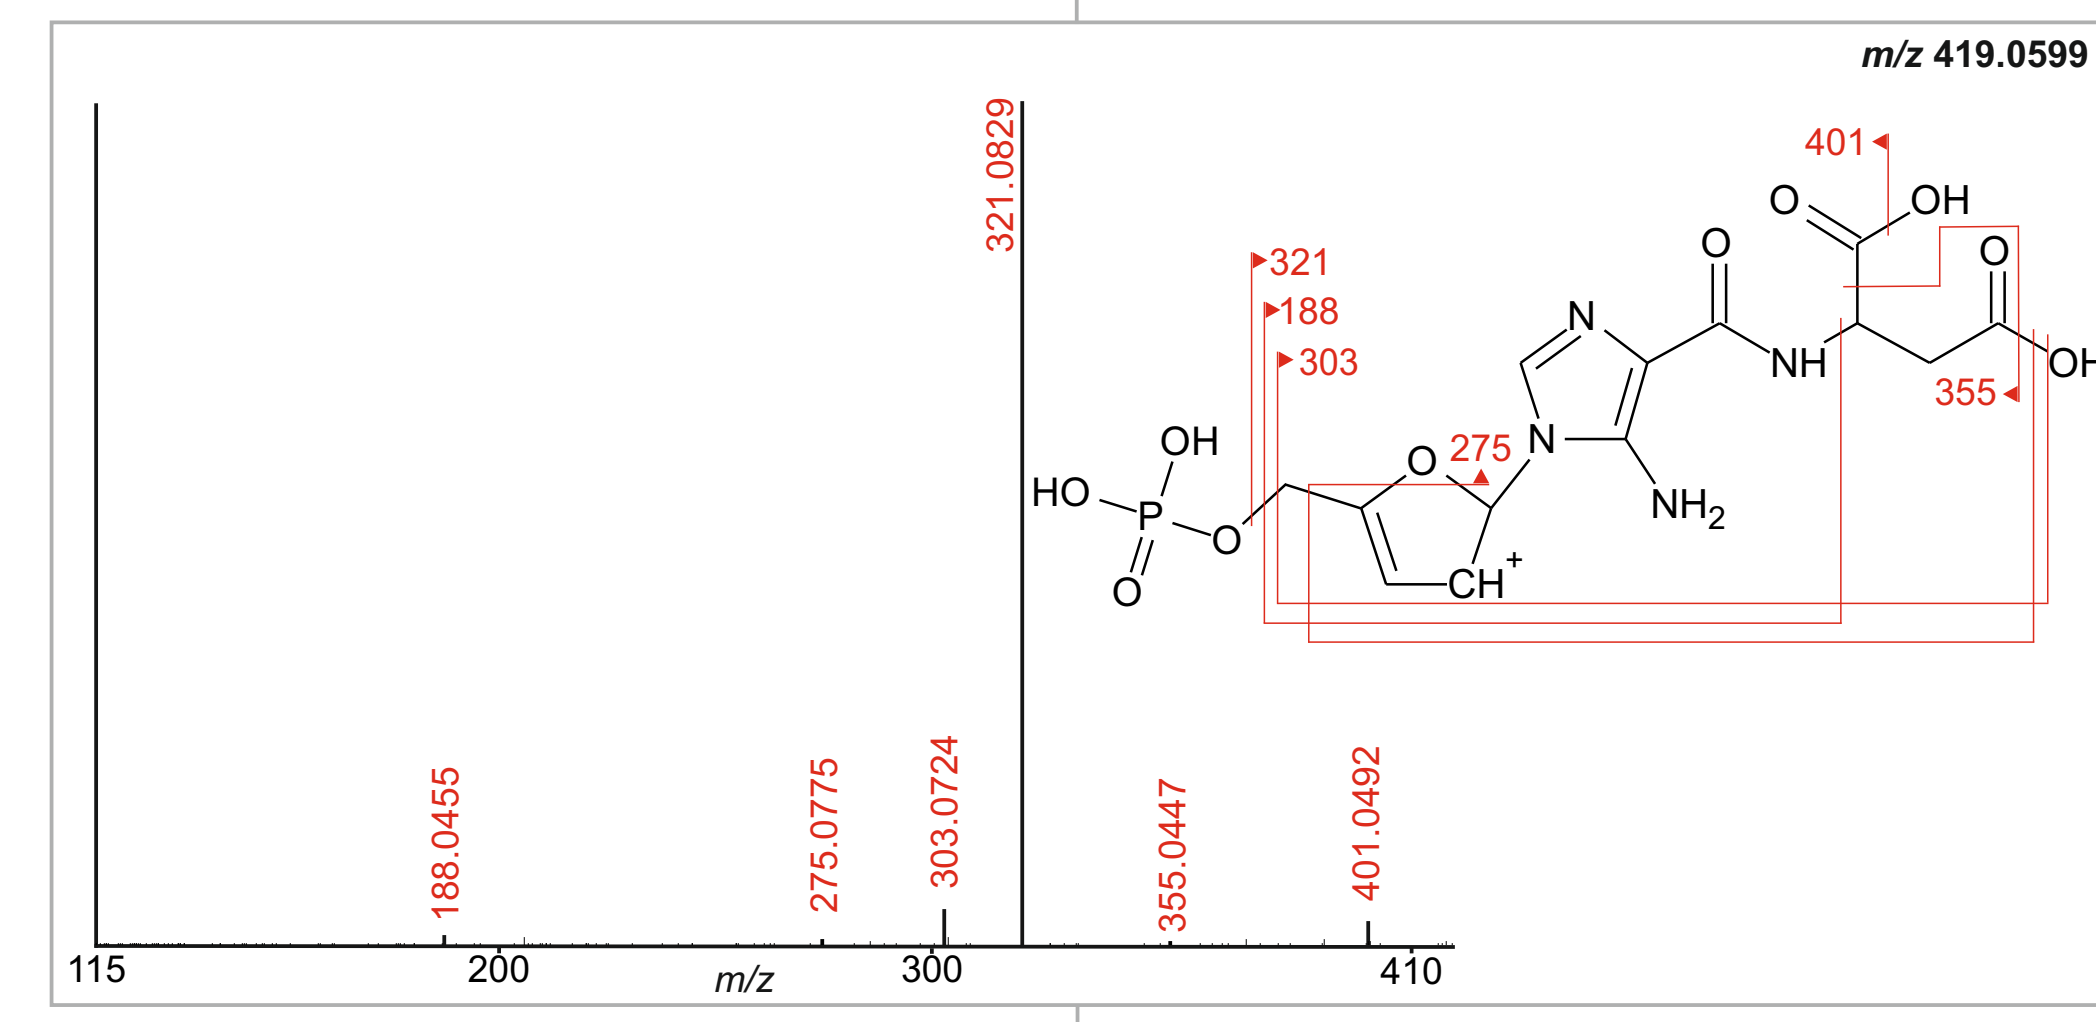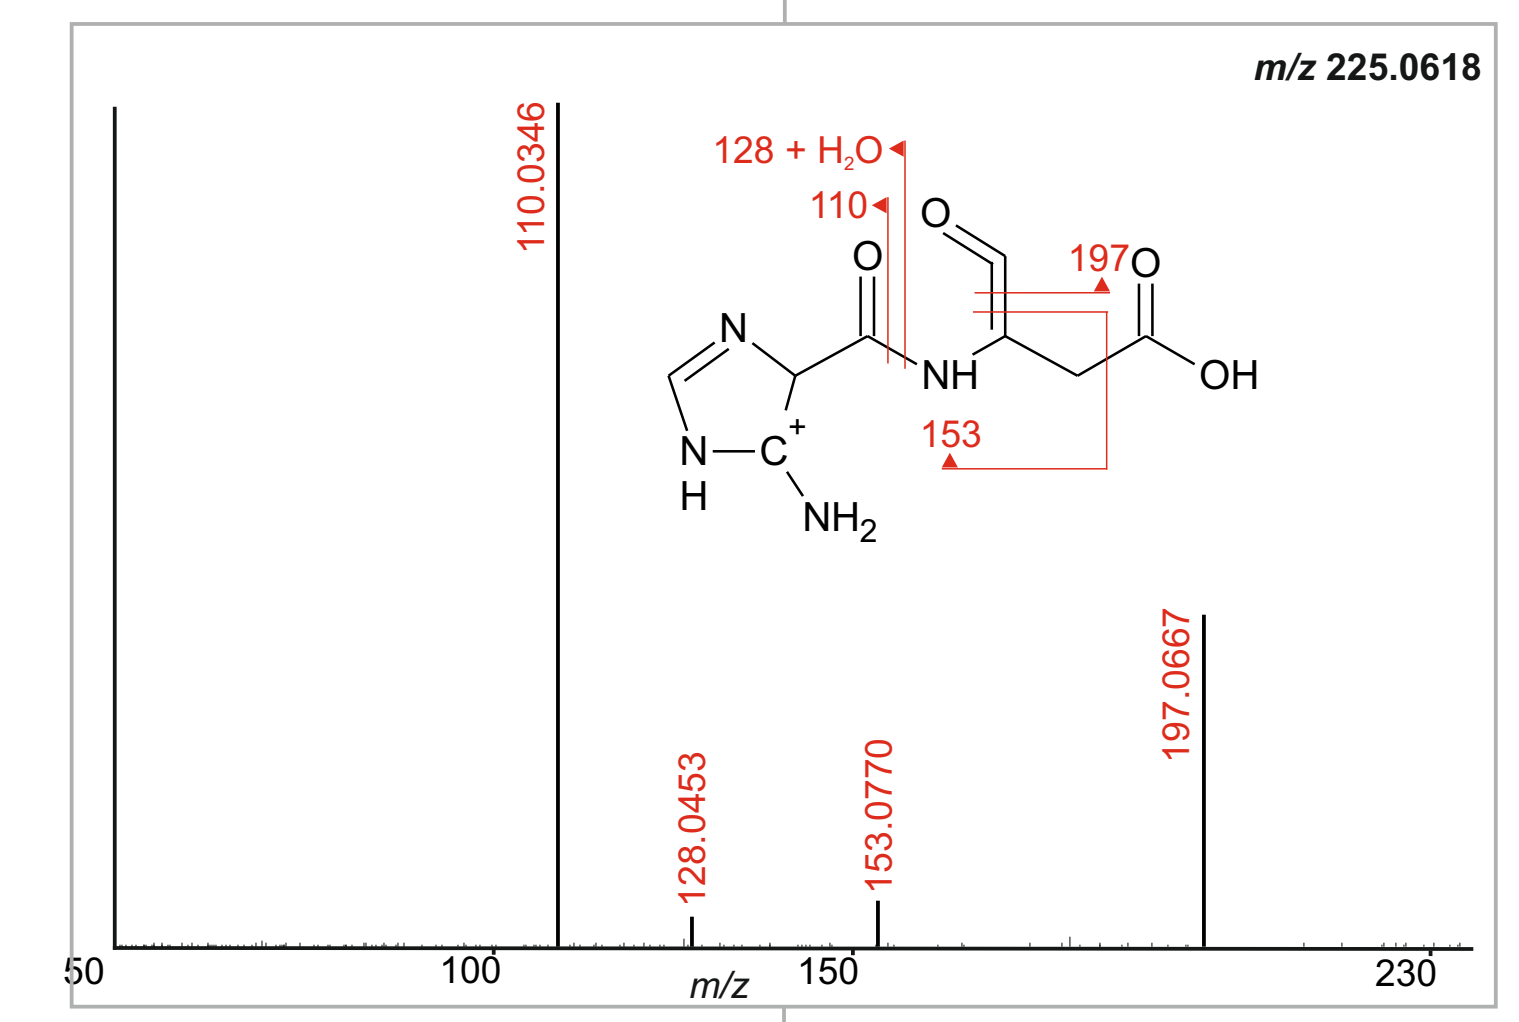

MS<sup>4</sup>

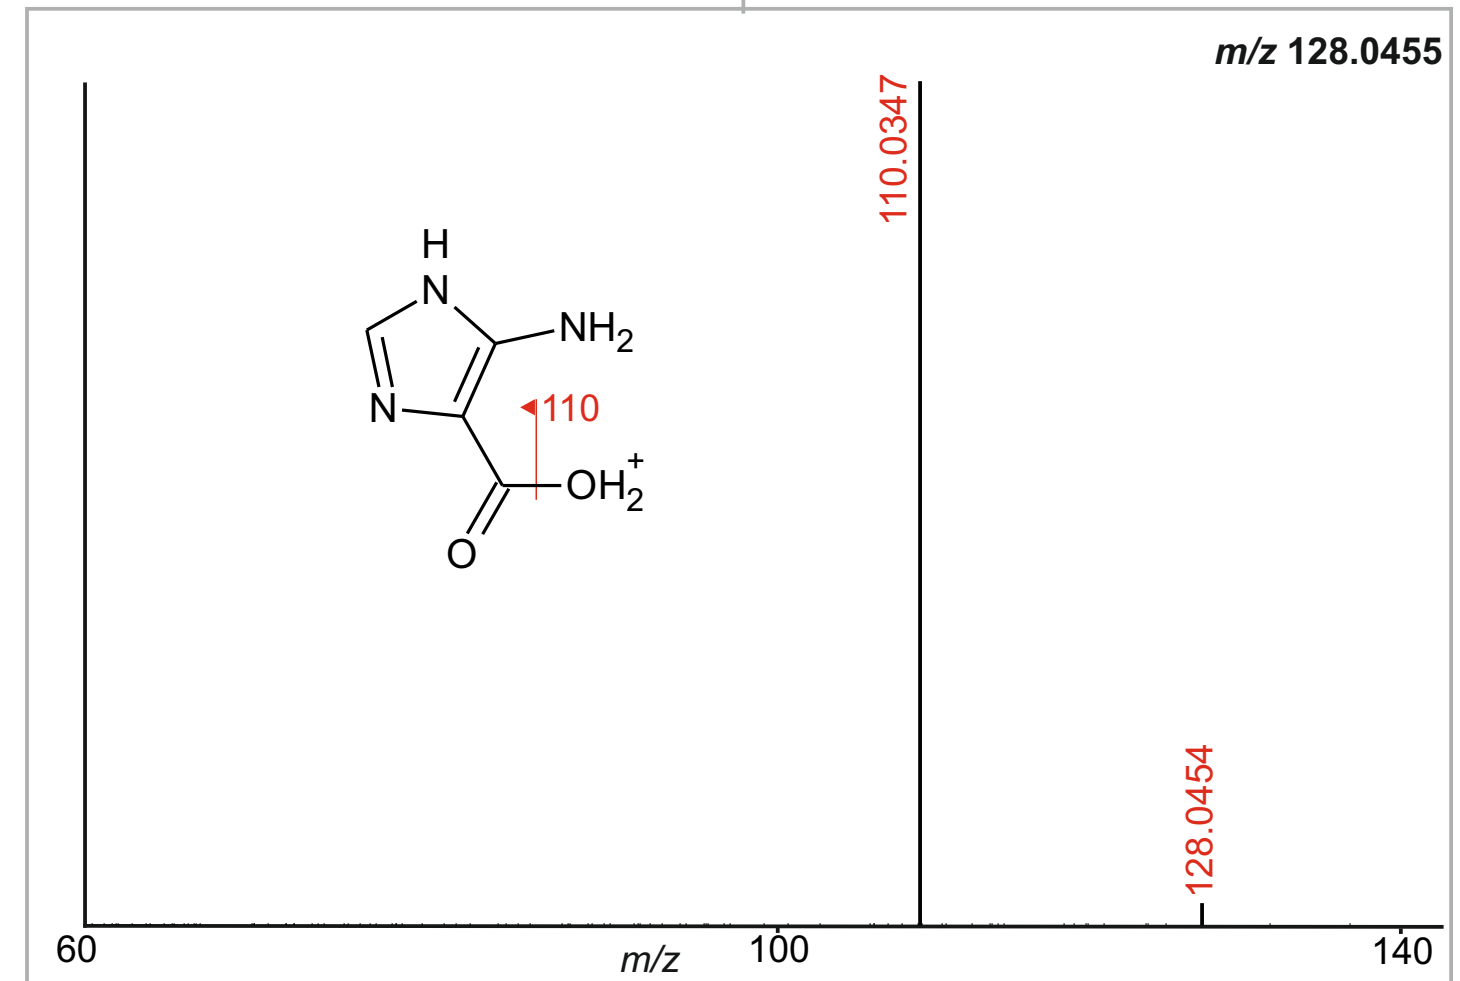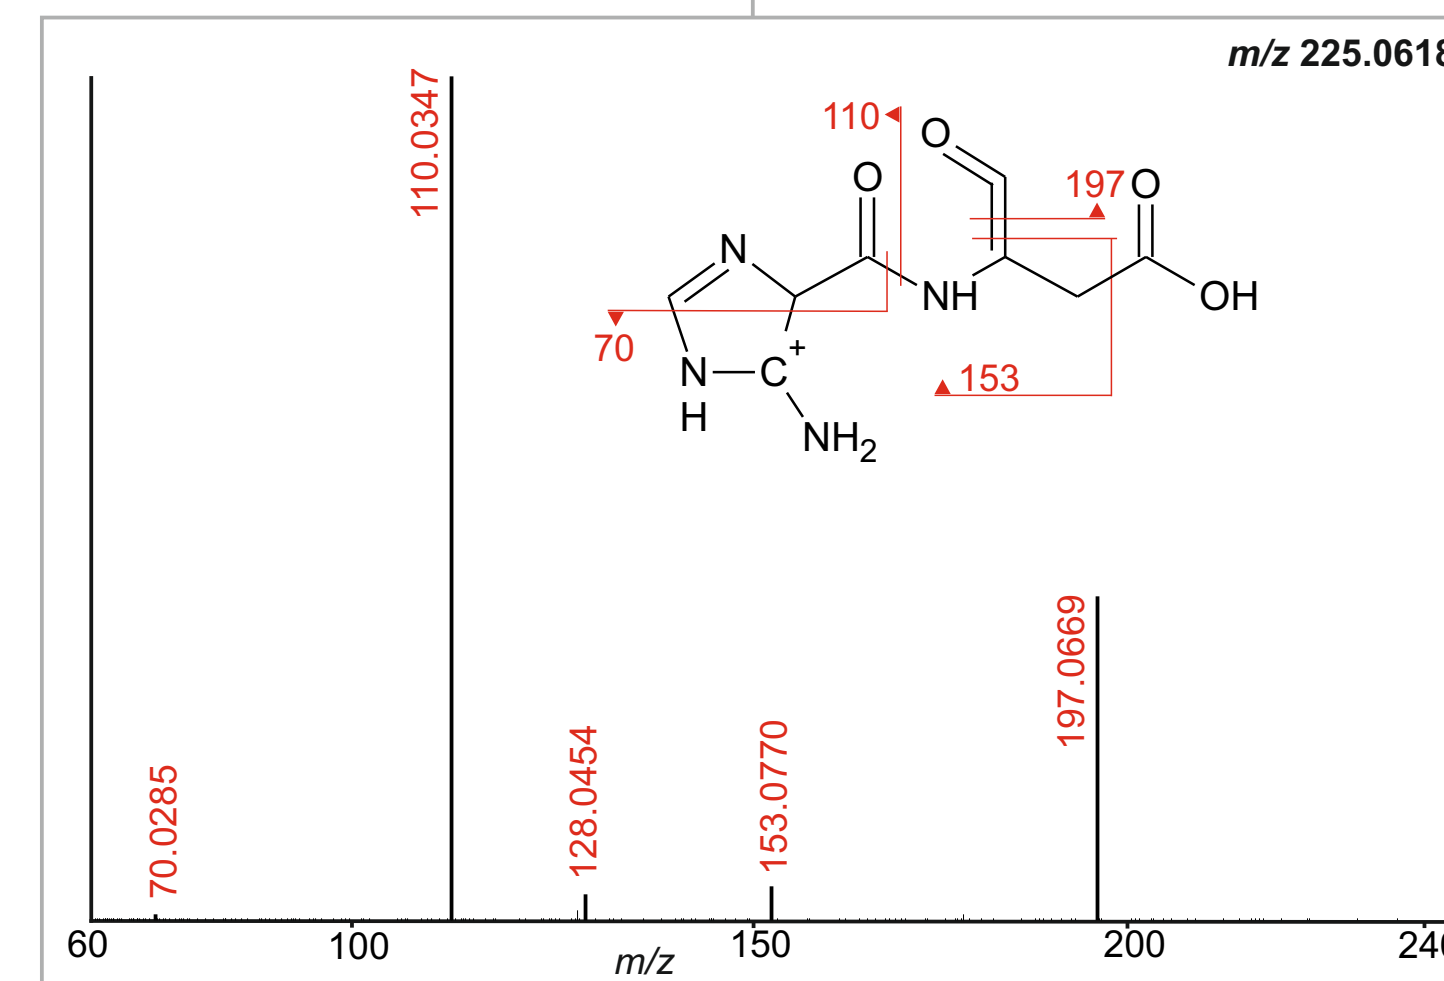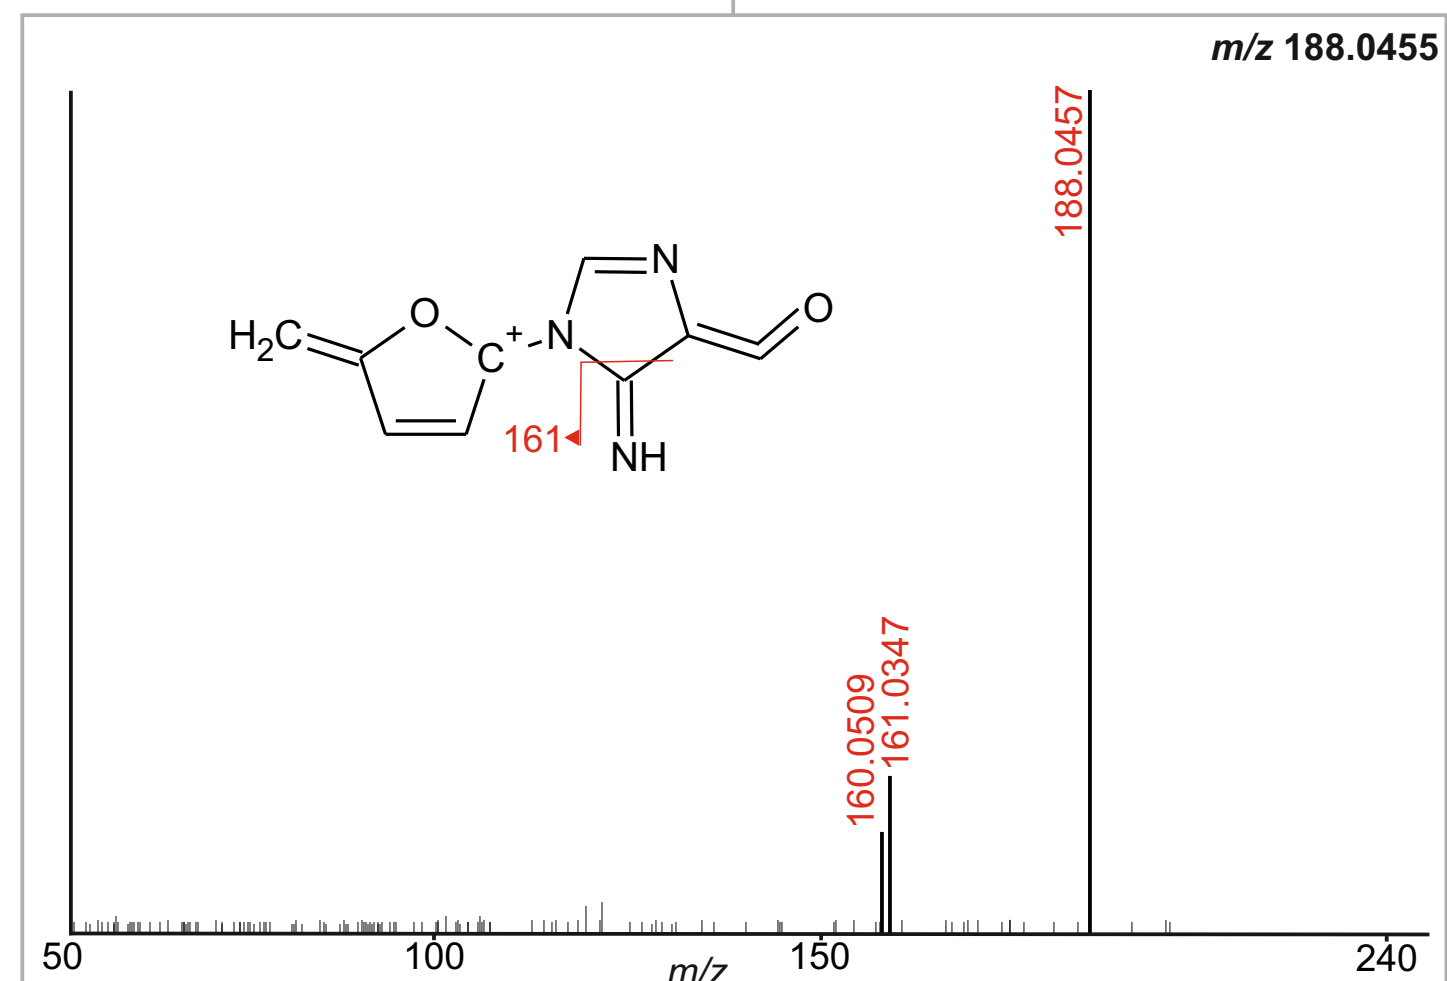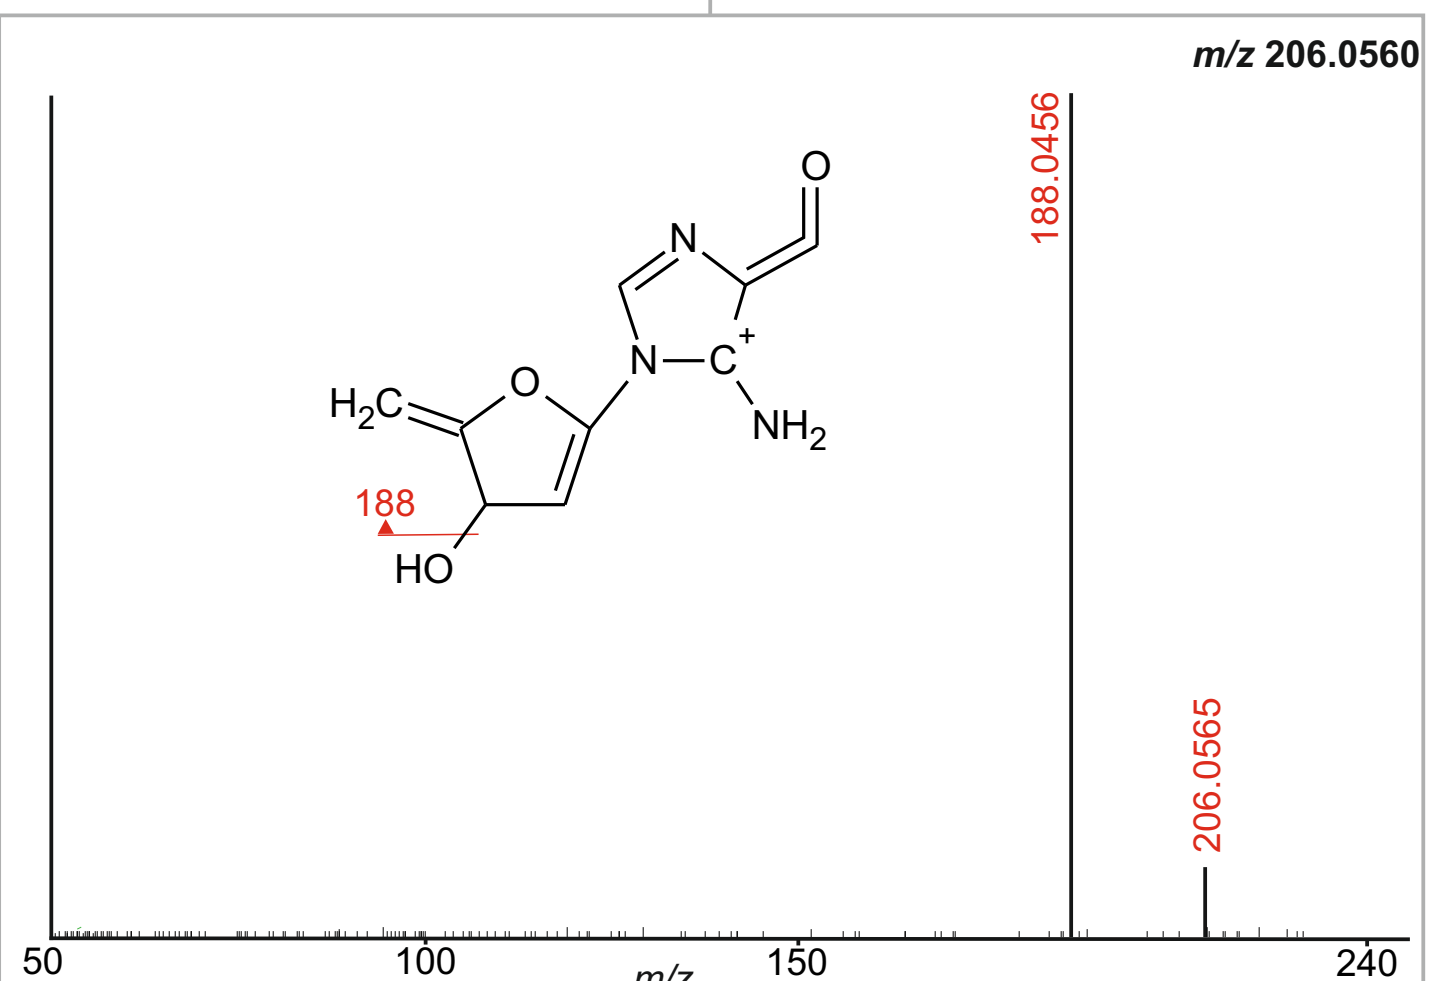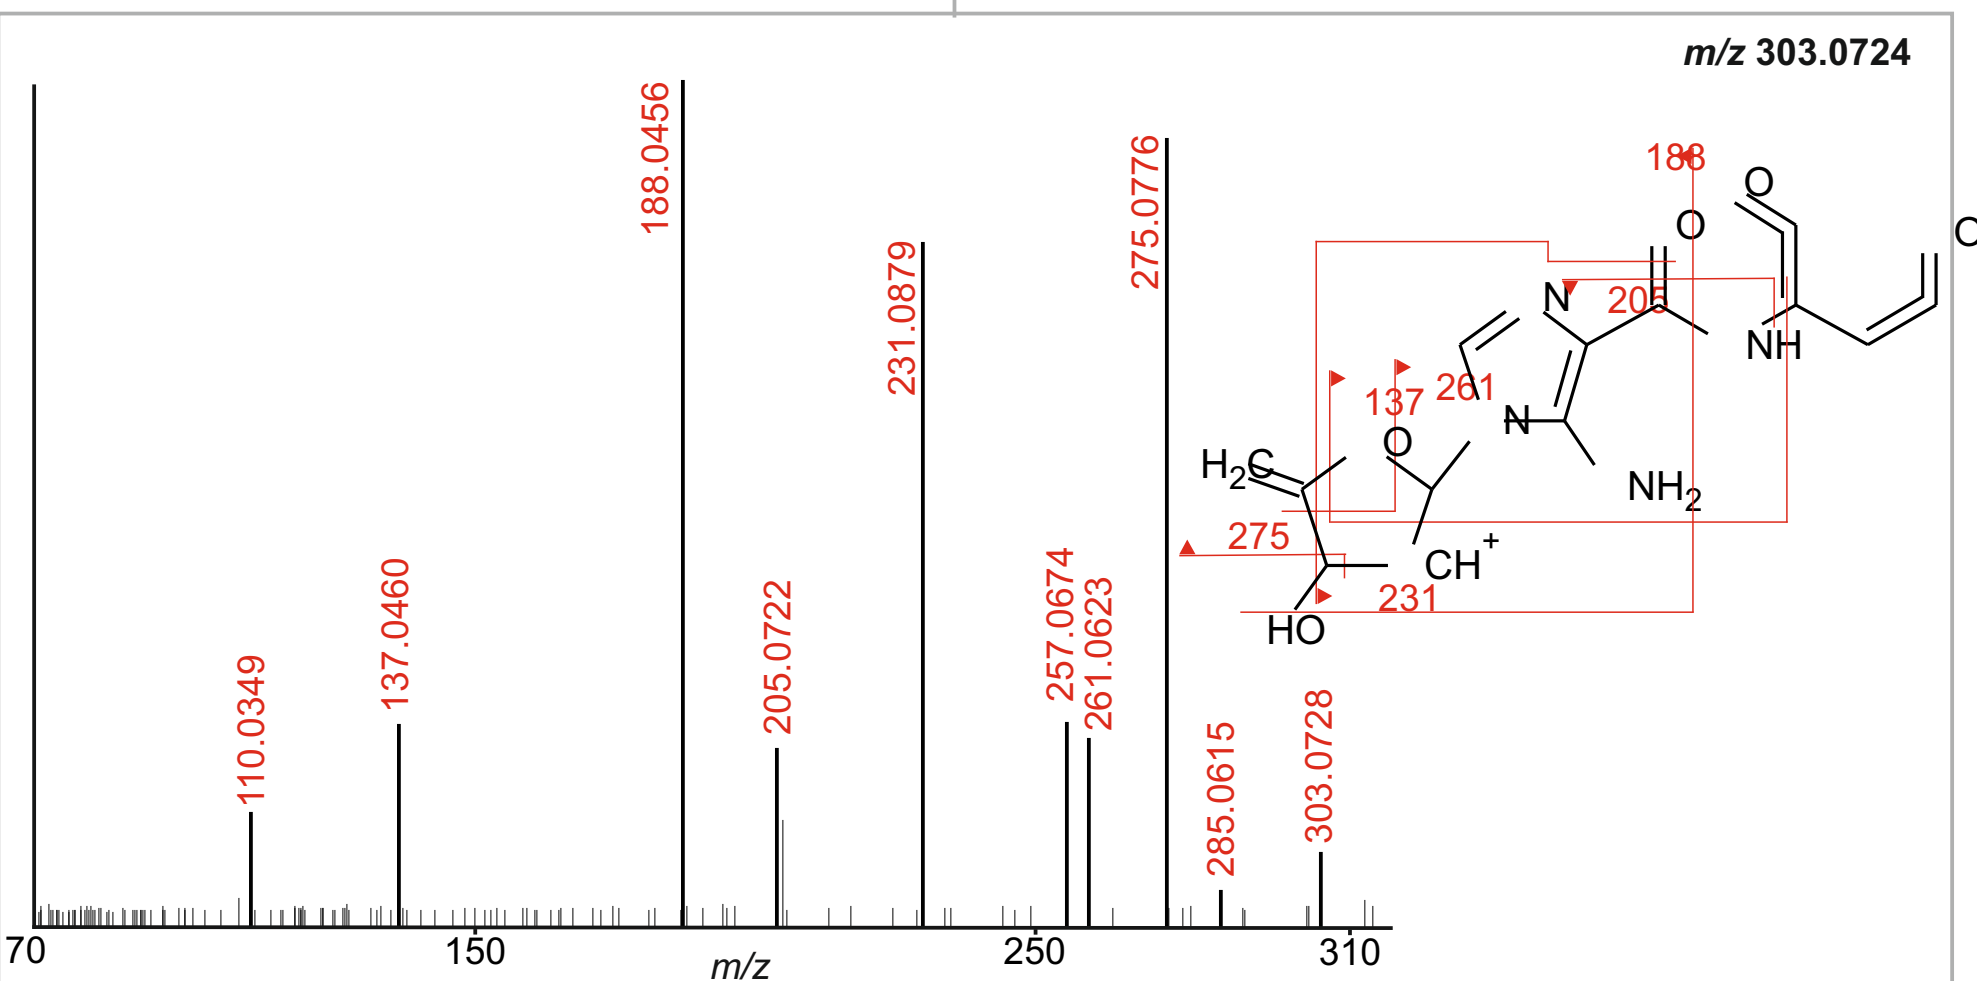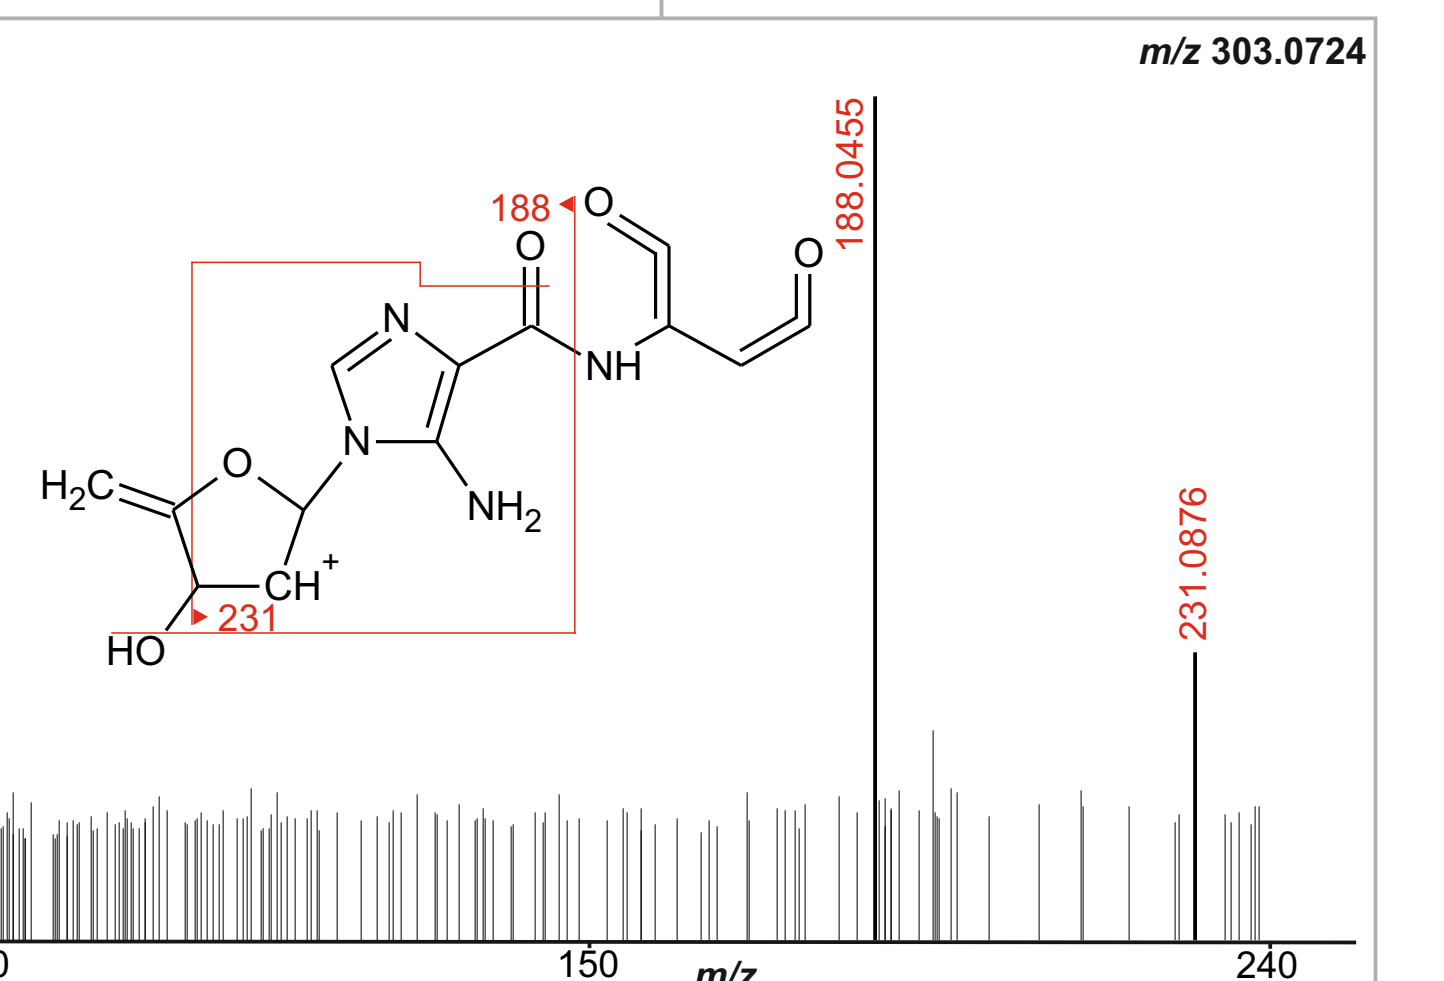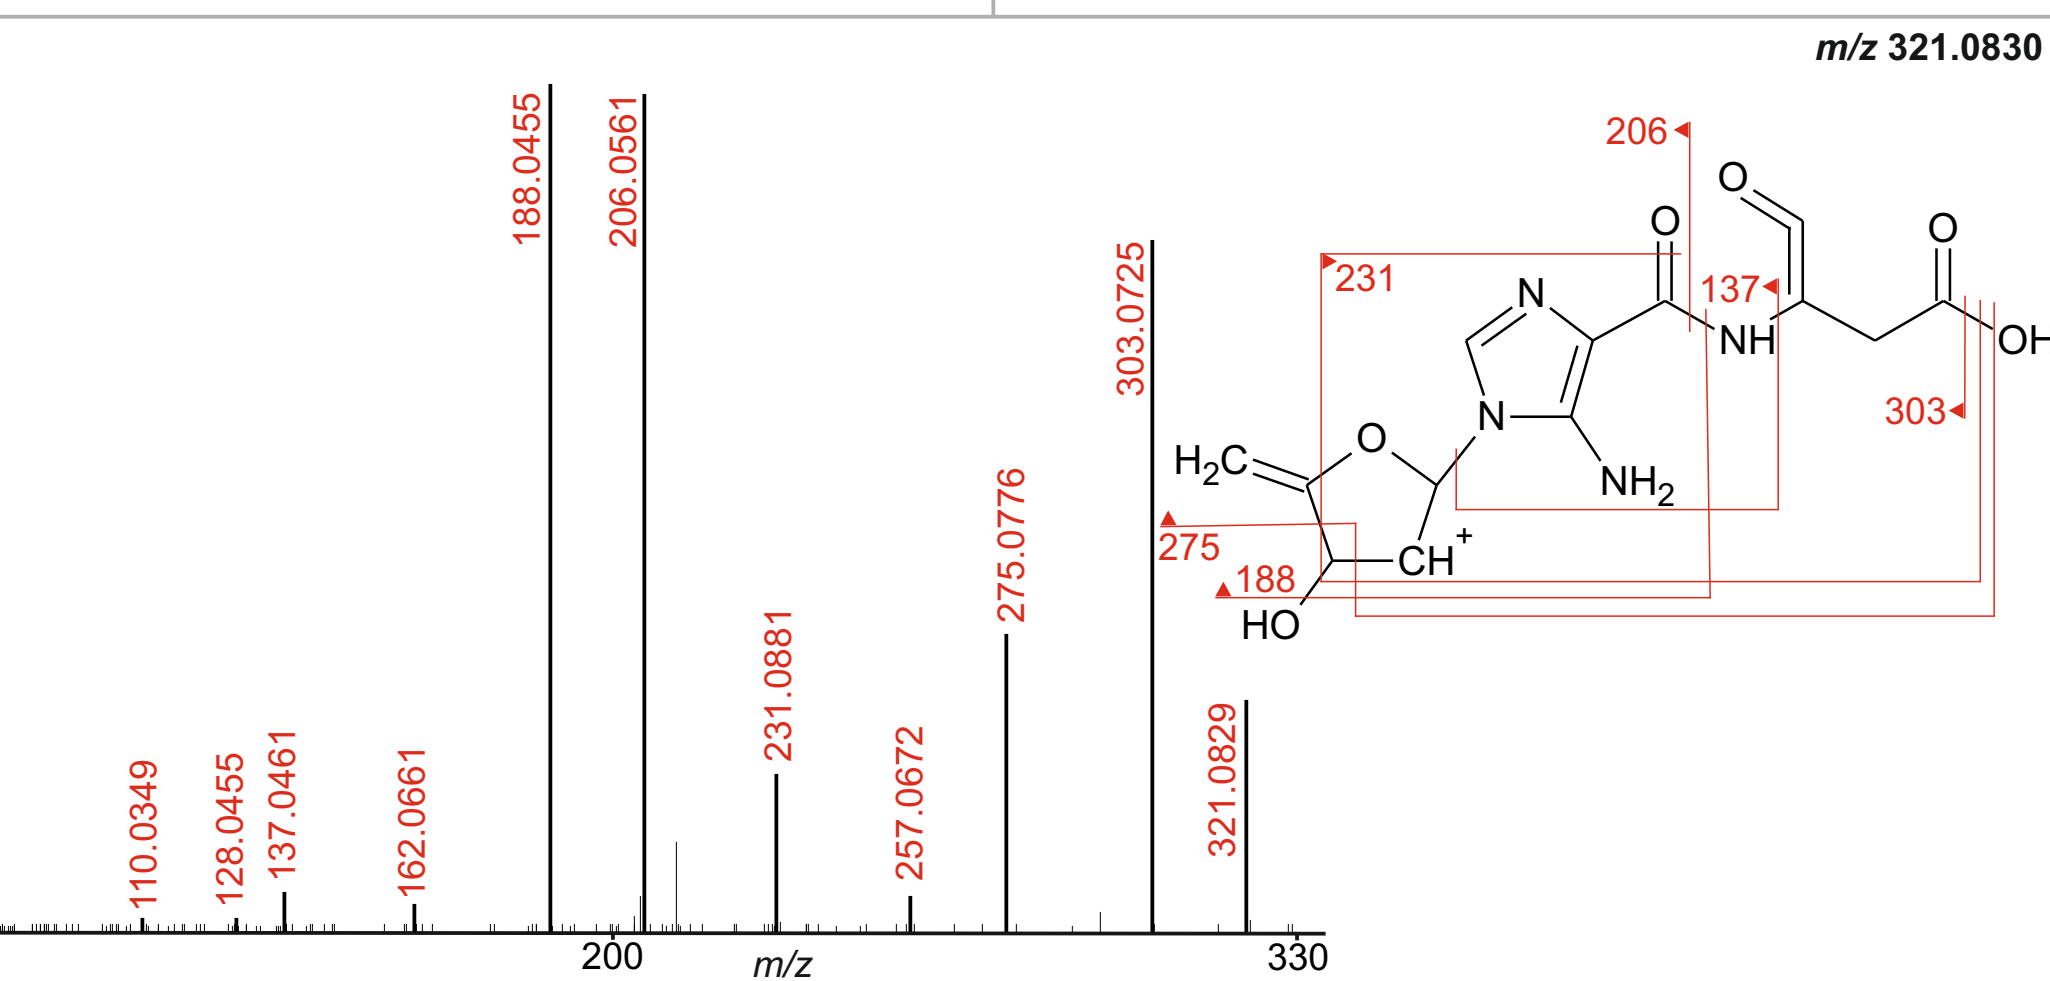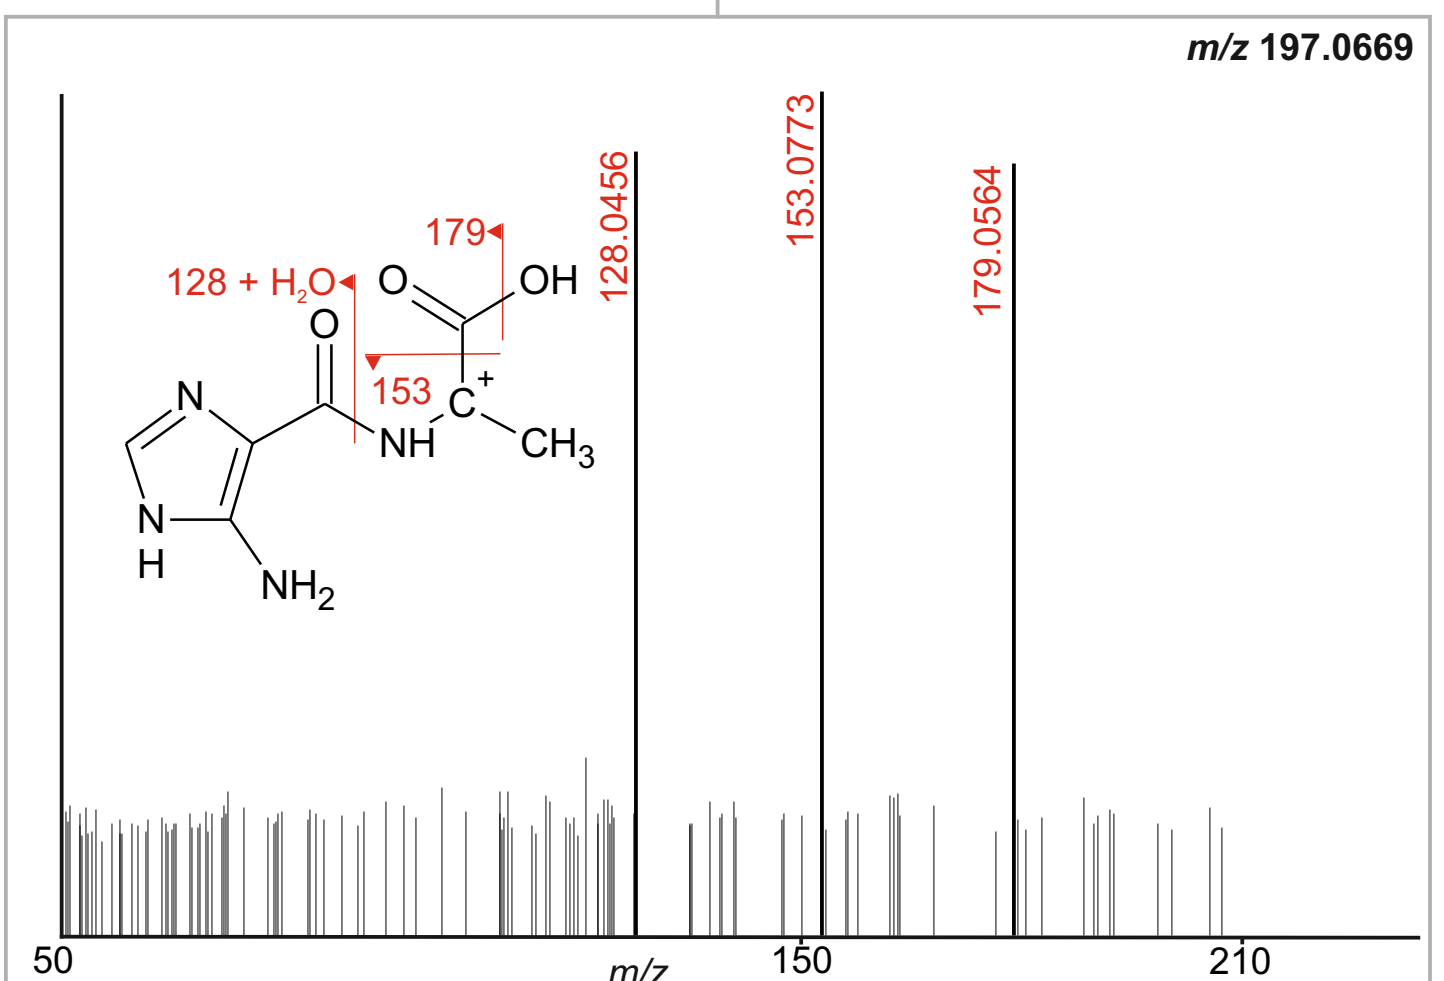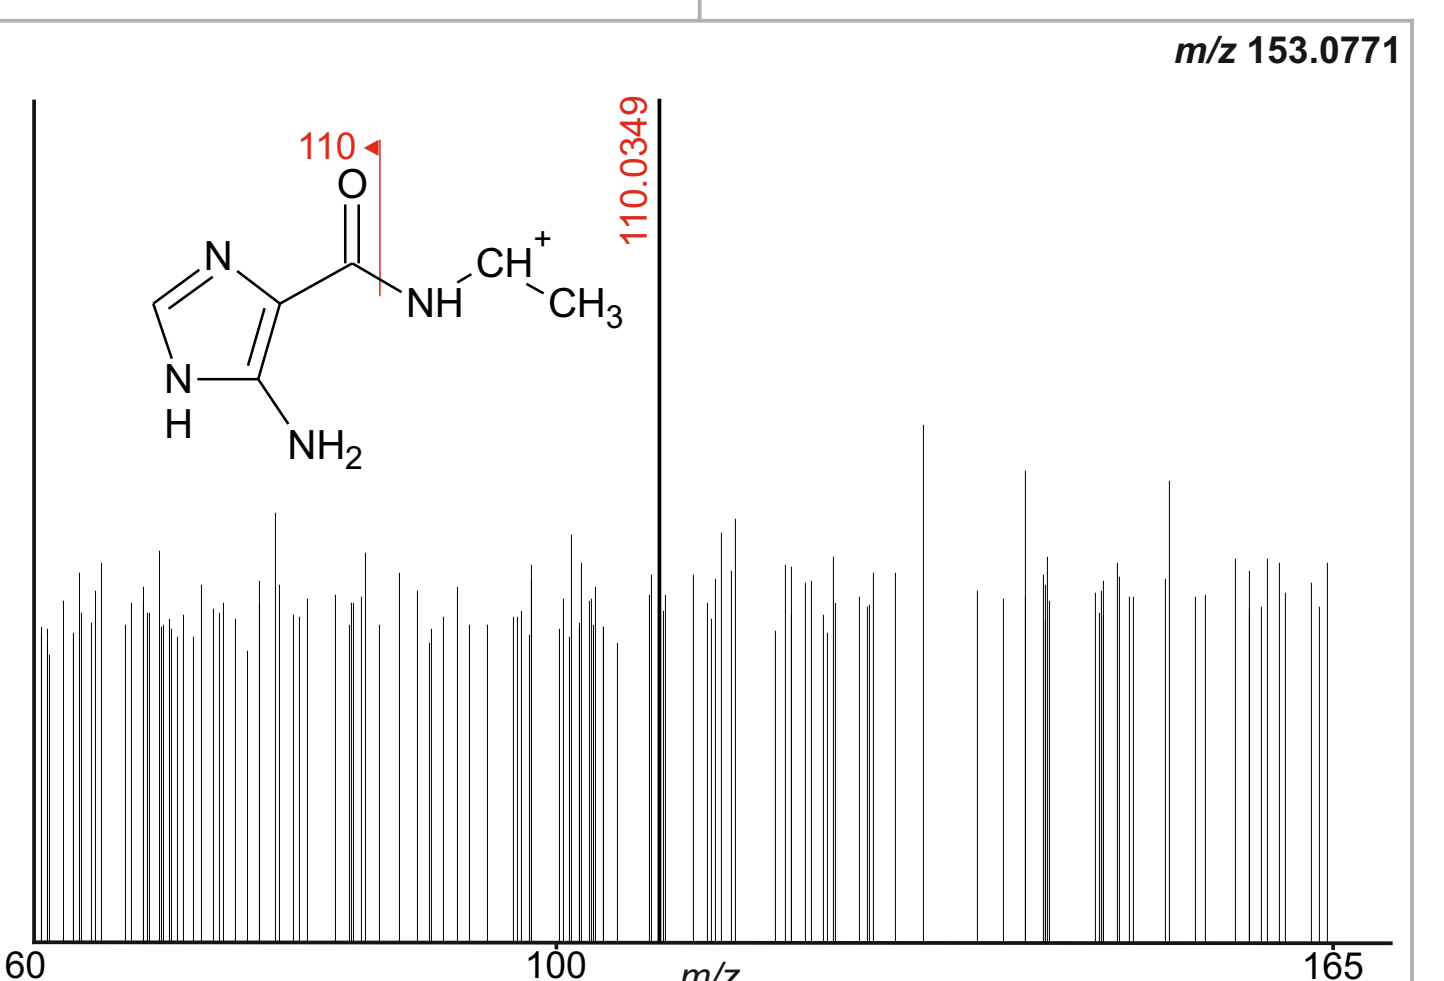

# AICar

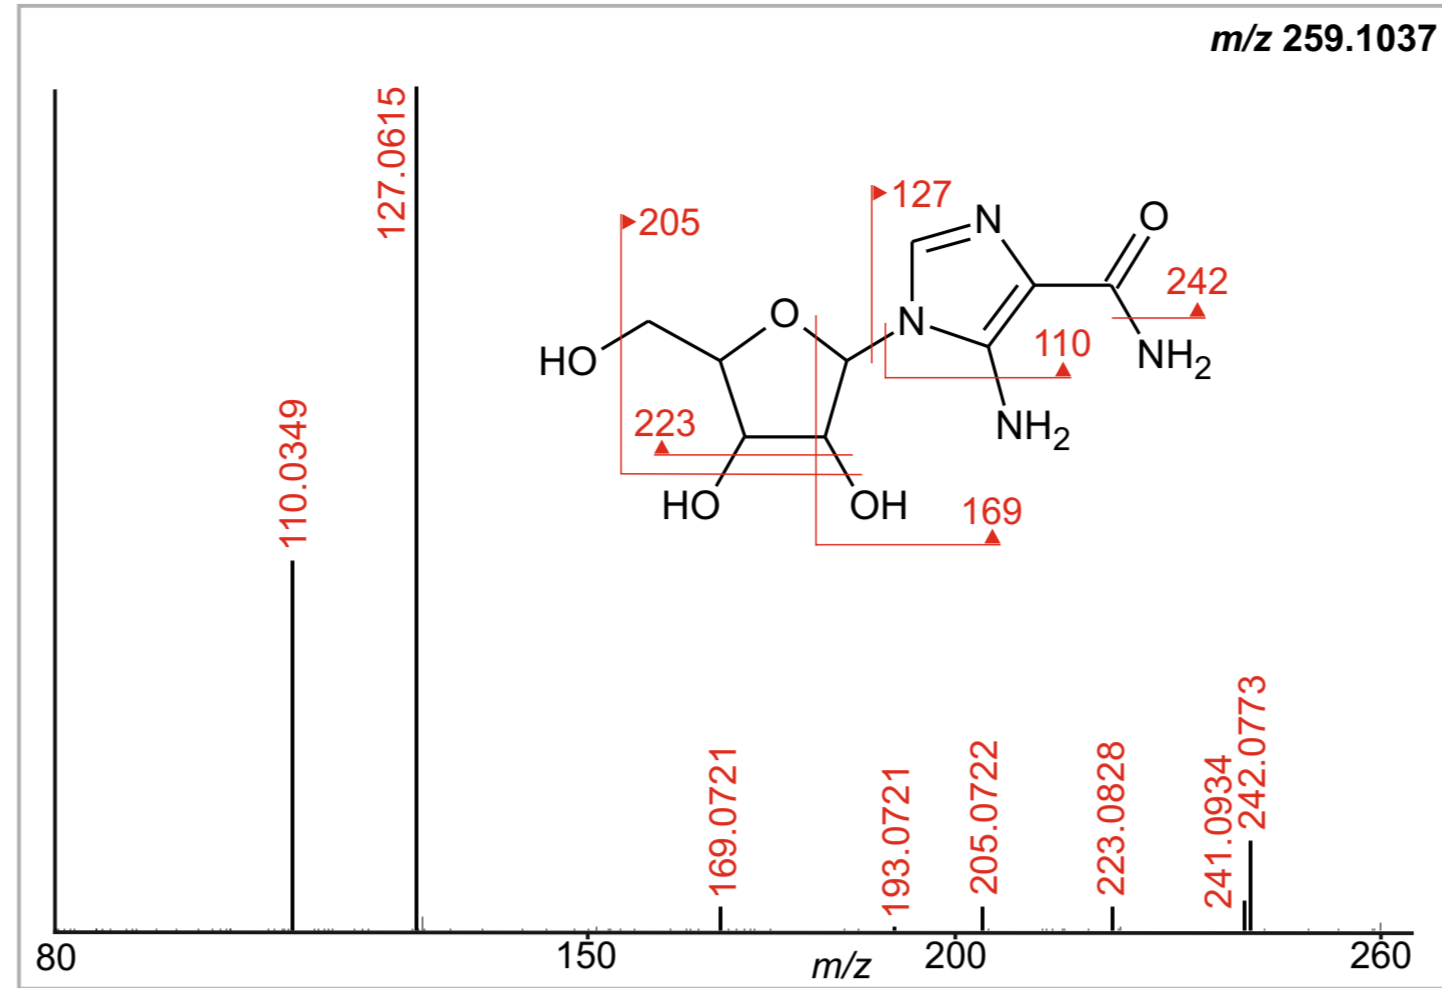

MS<sup>2</sup>

MS<sup>3</sup>

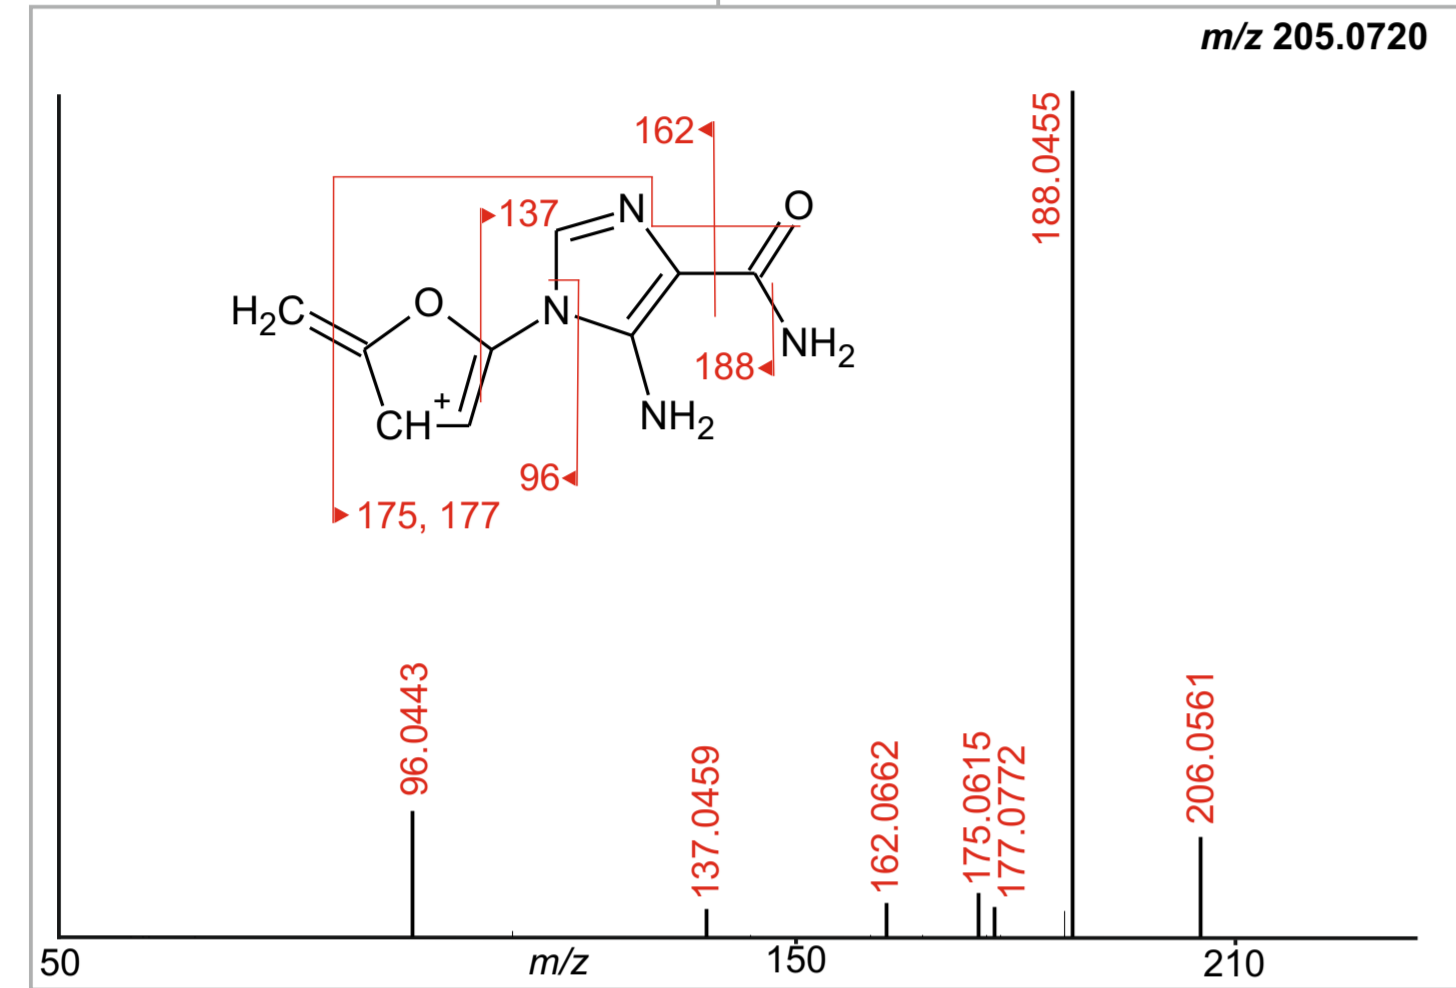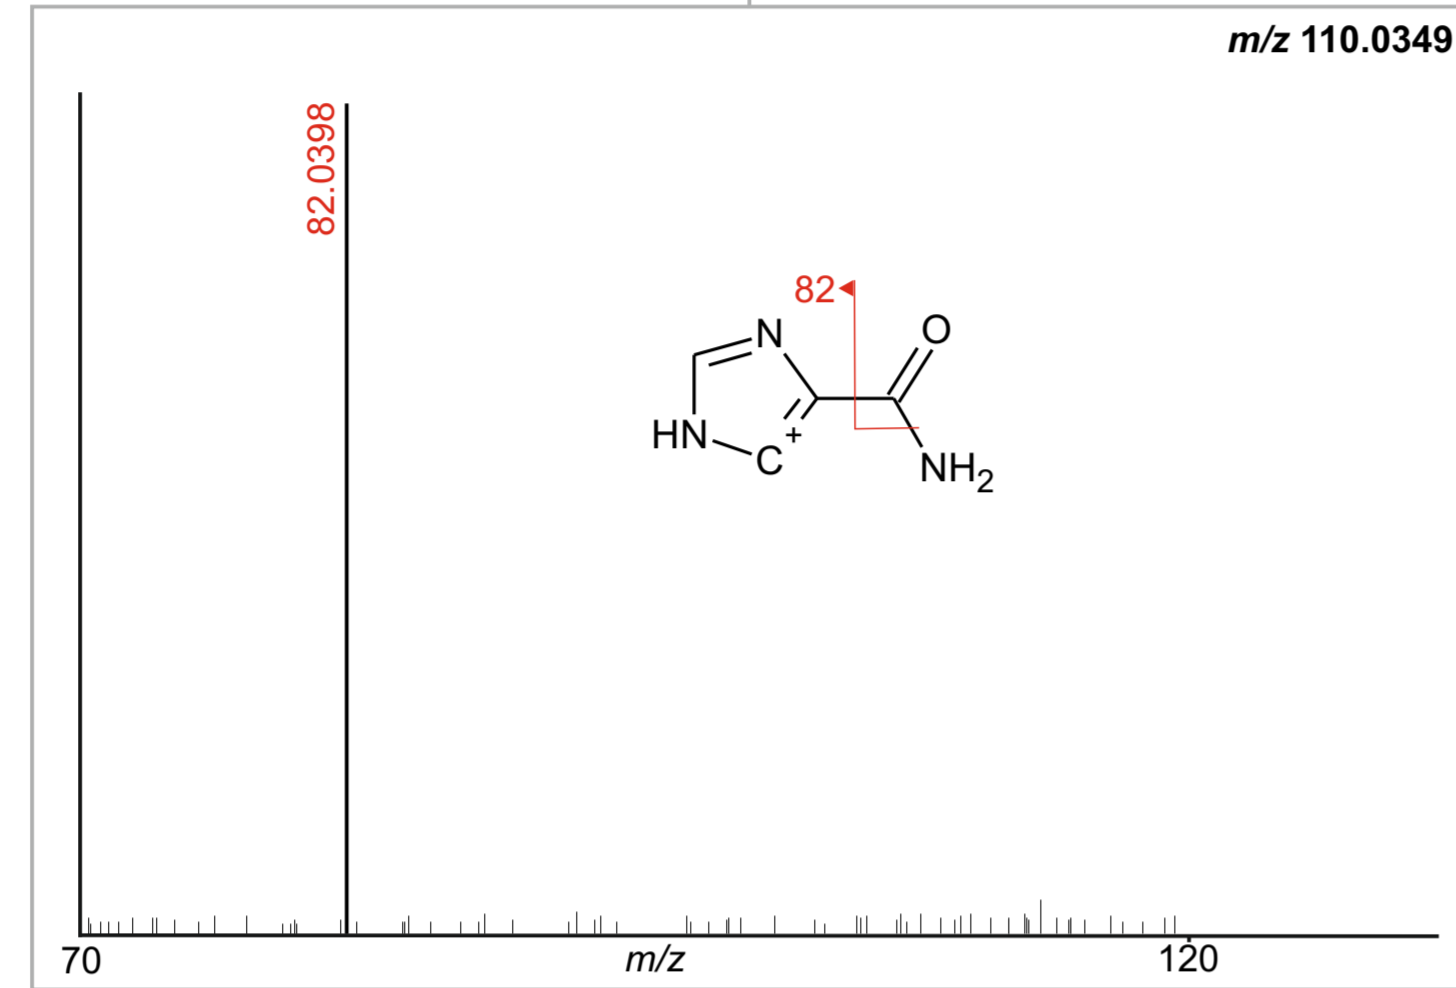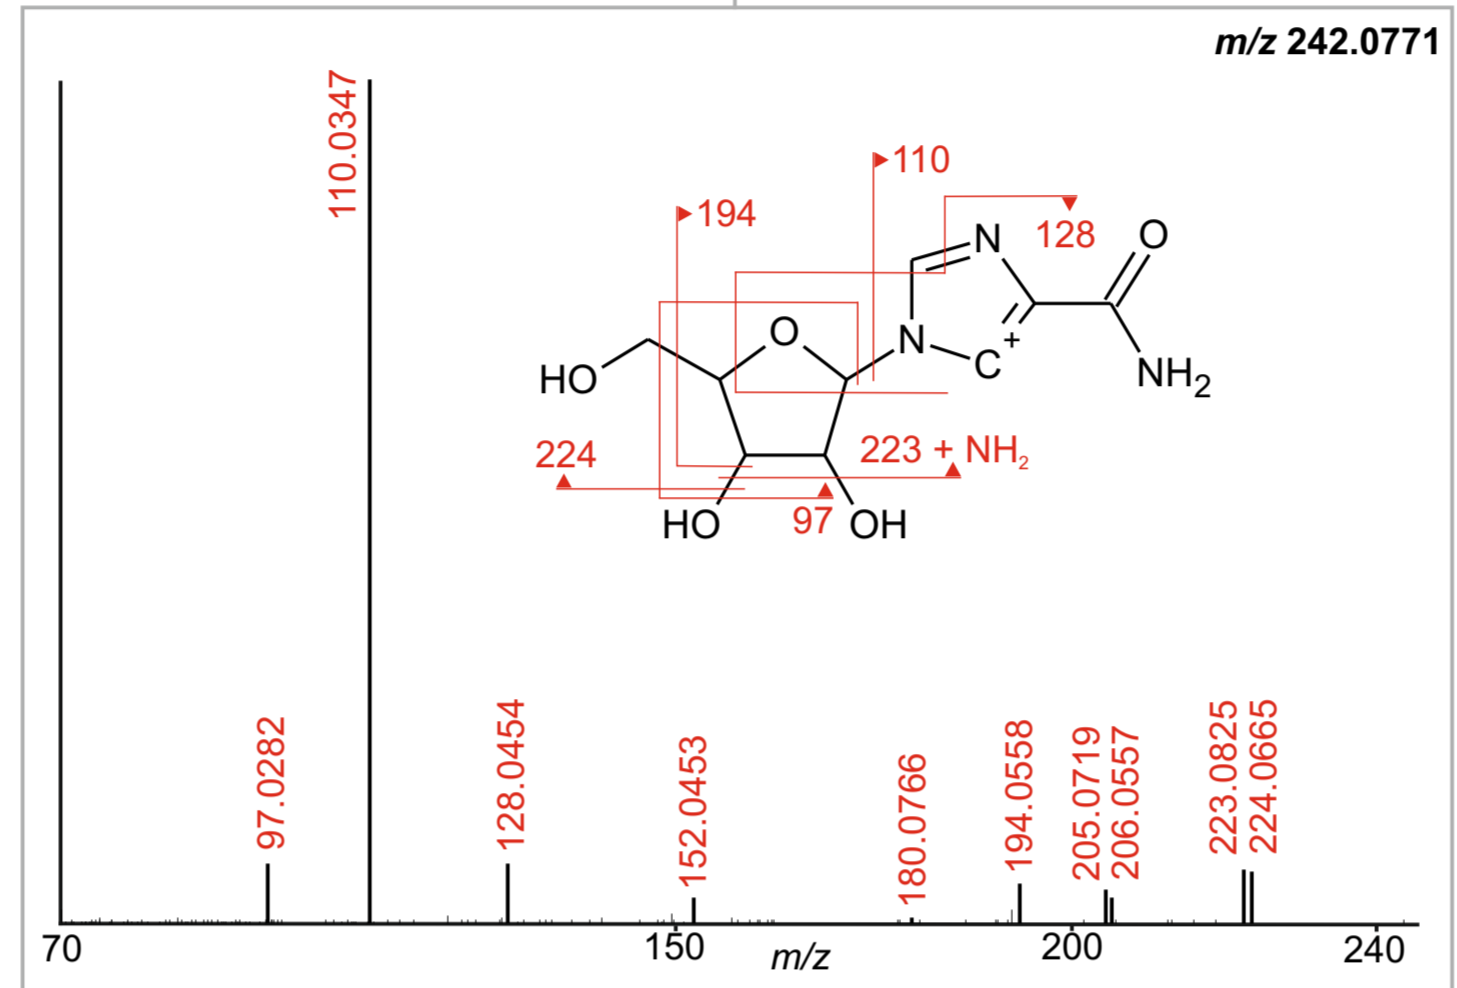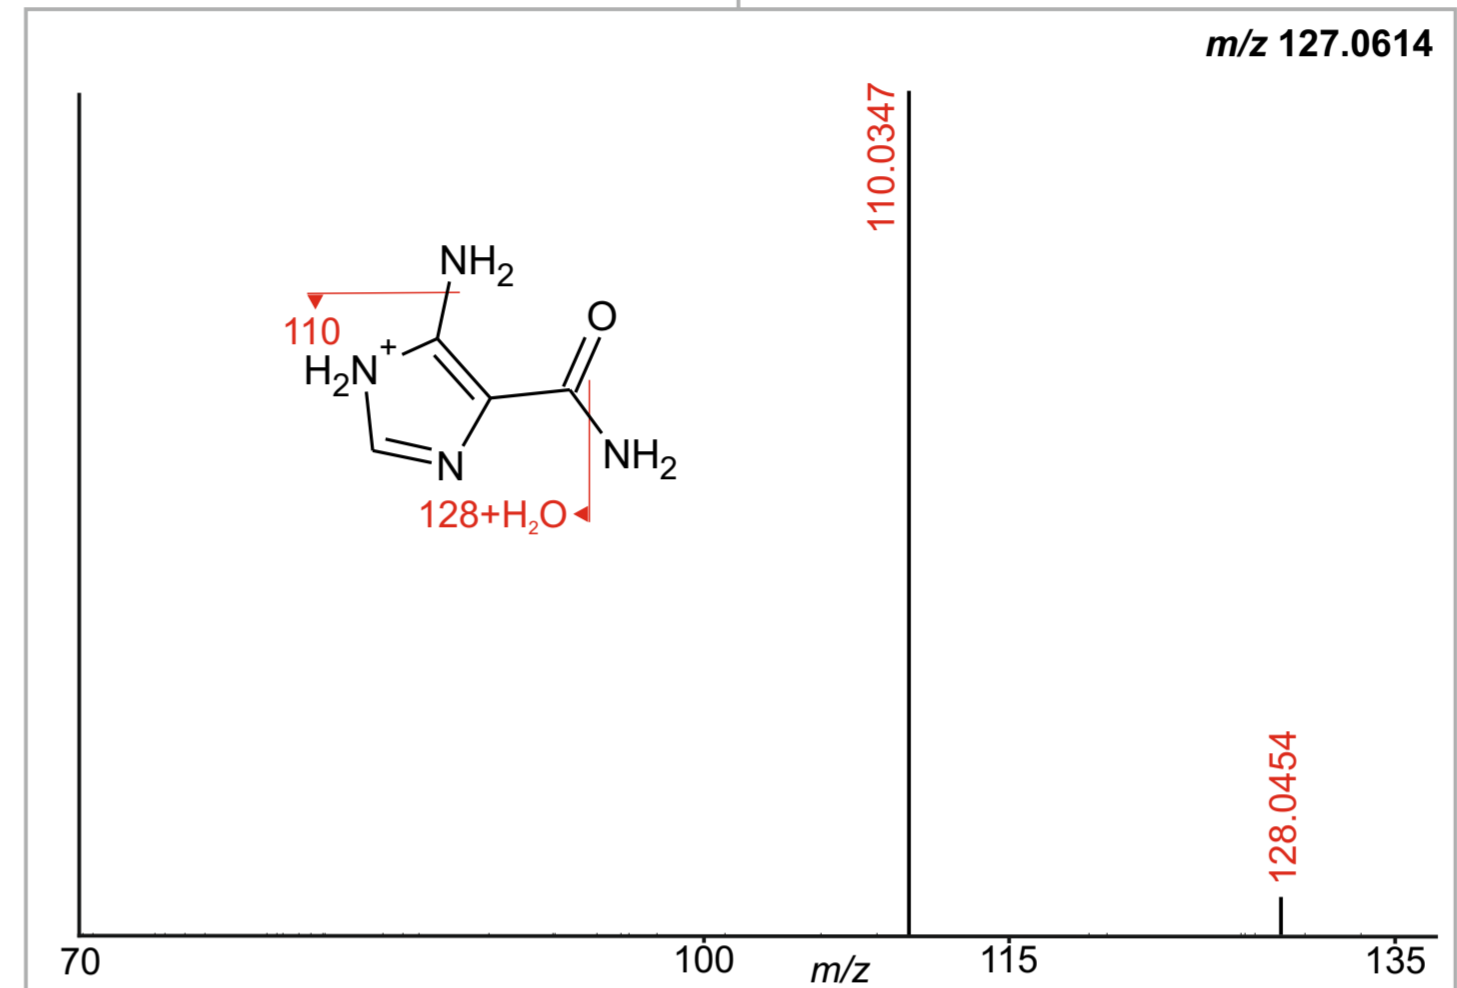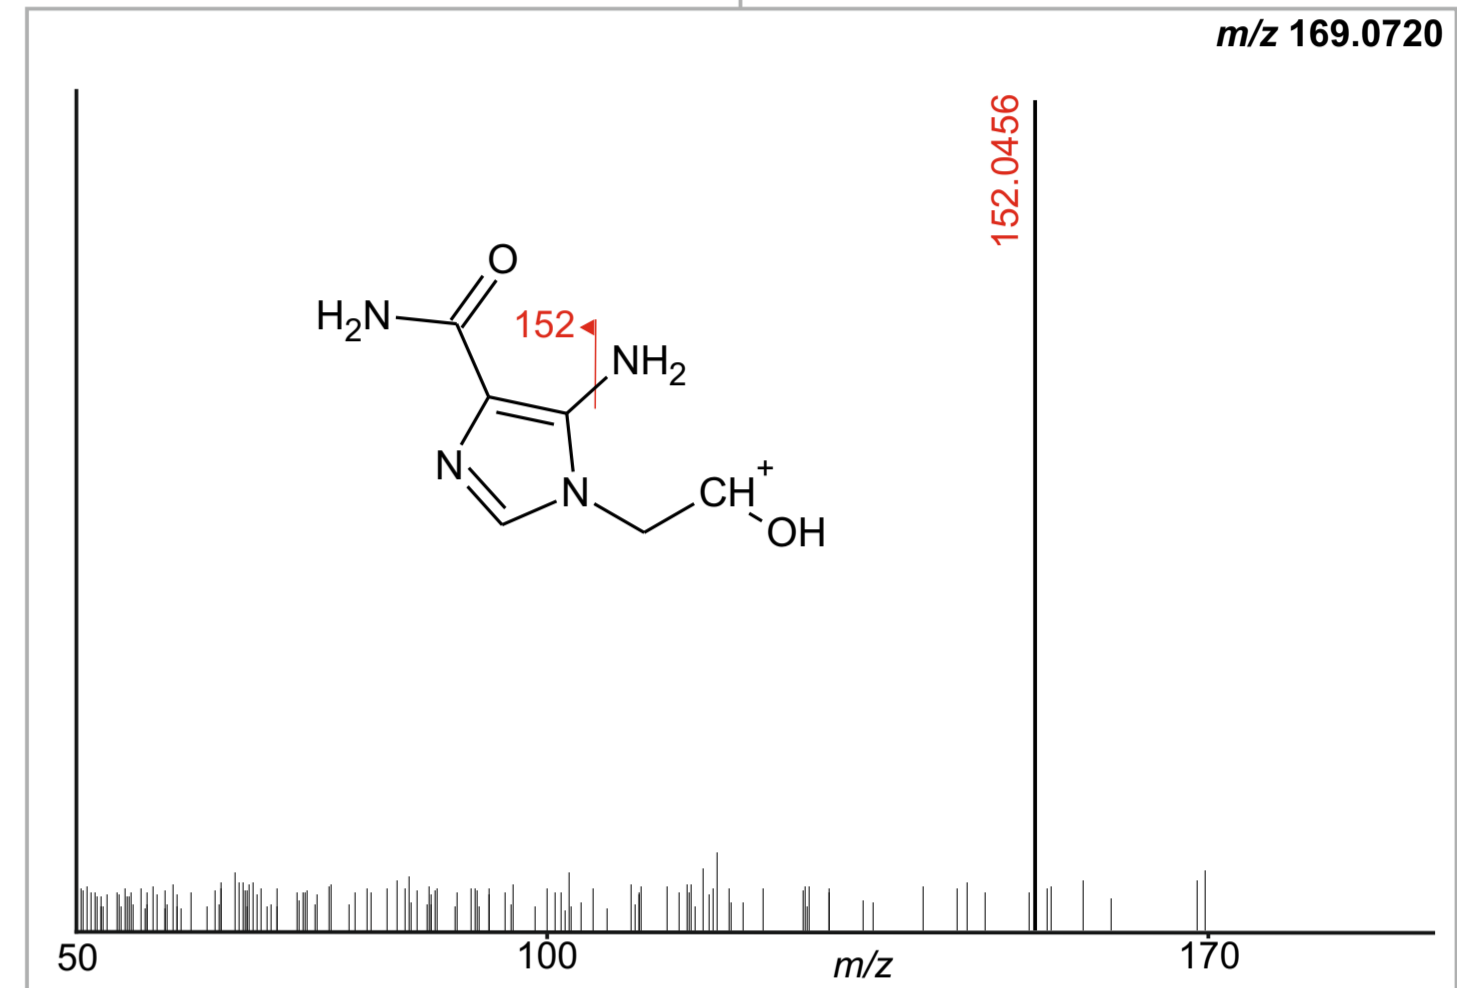

MS<sup>4</sup>

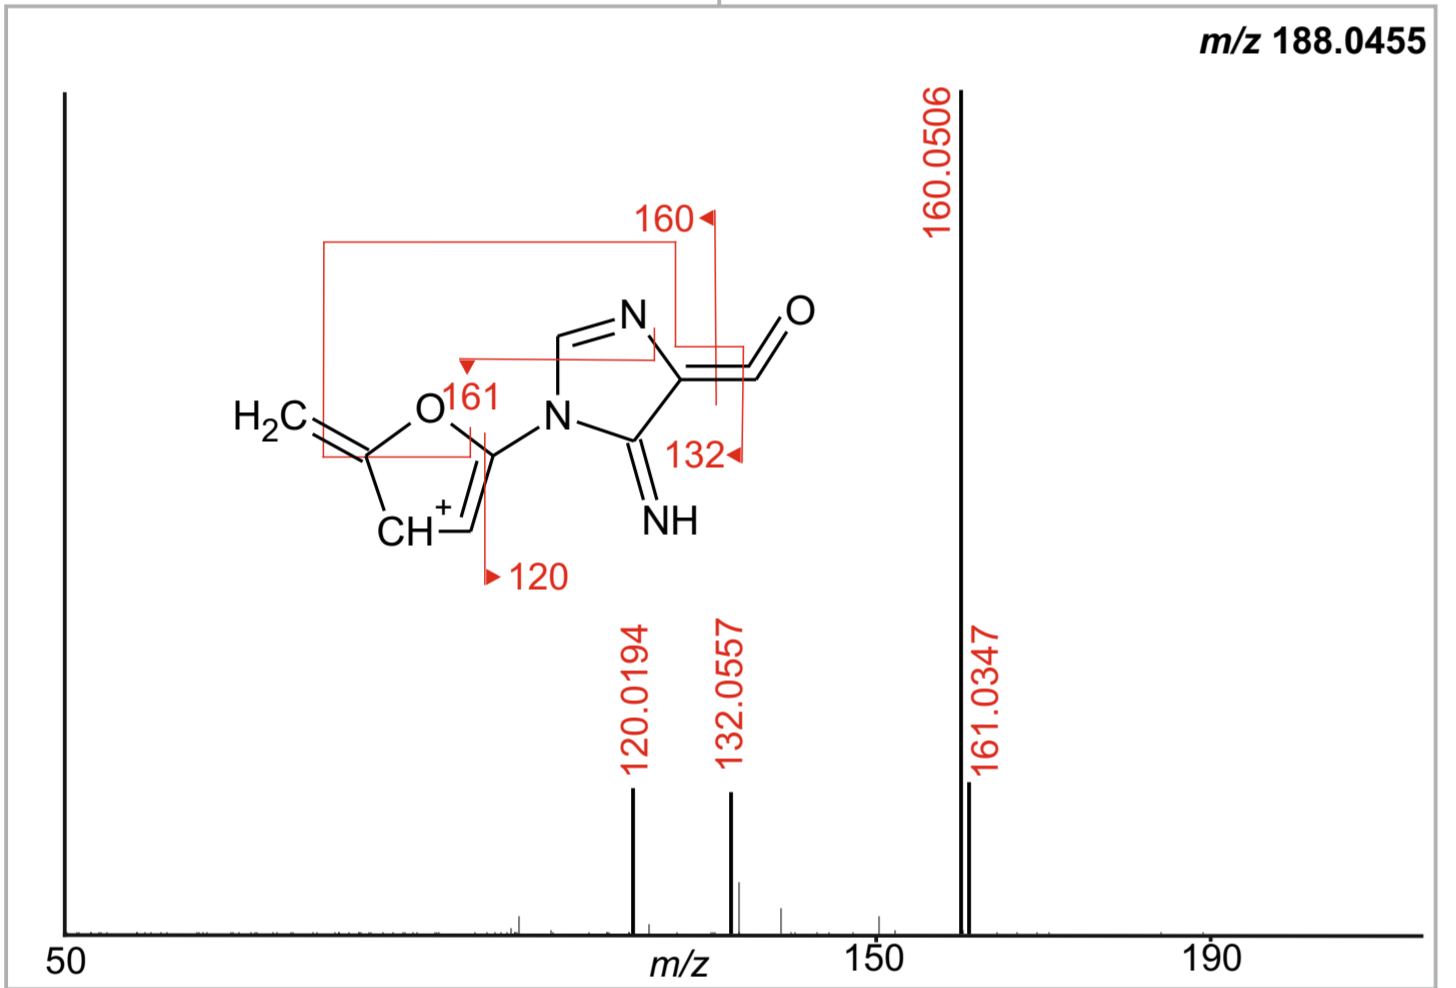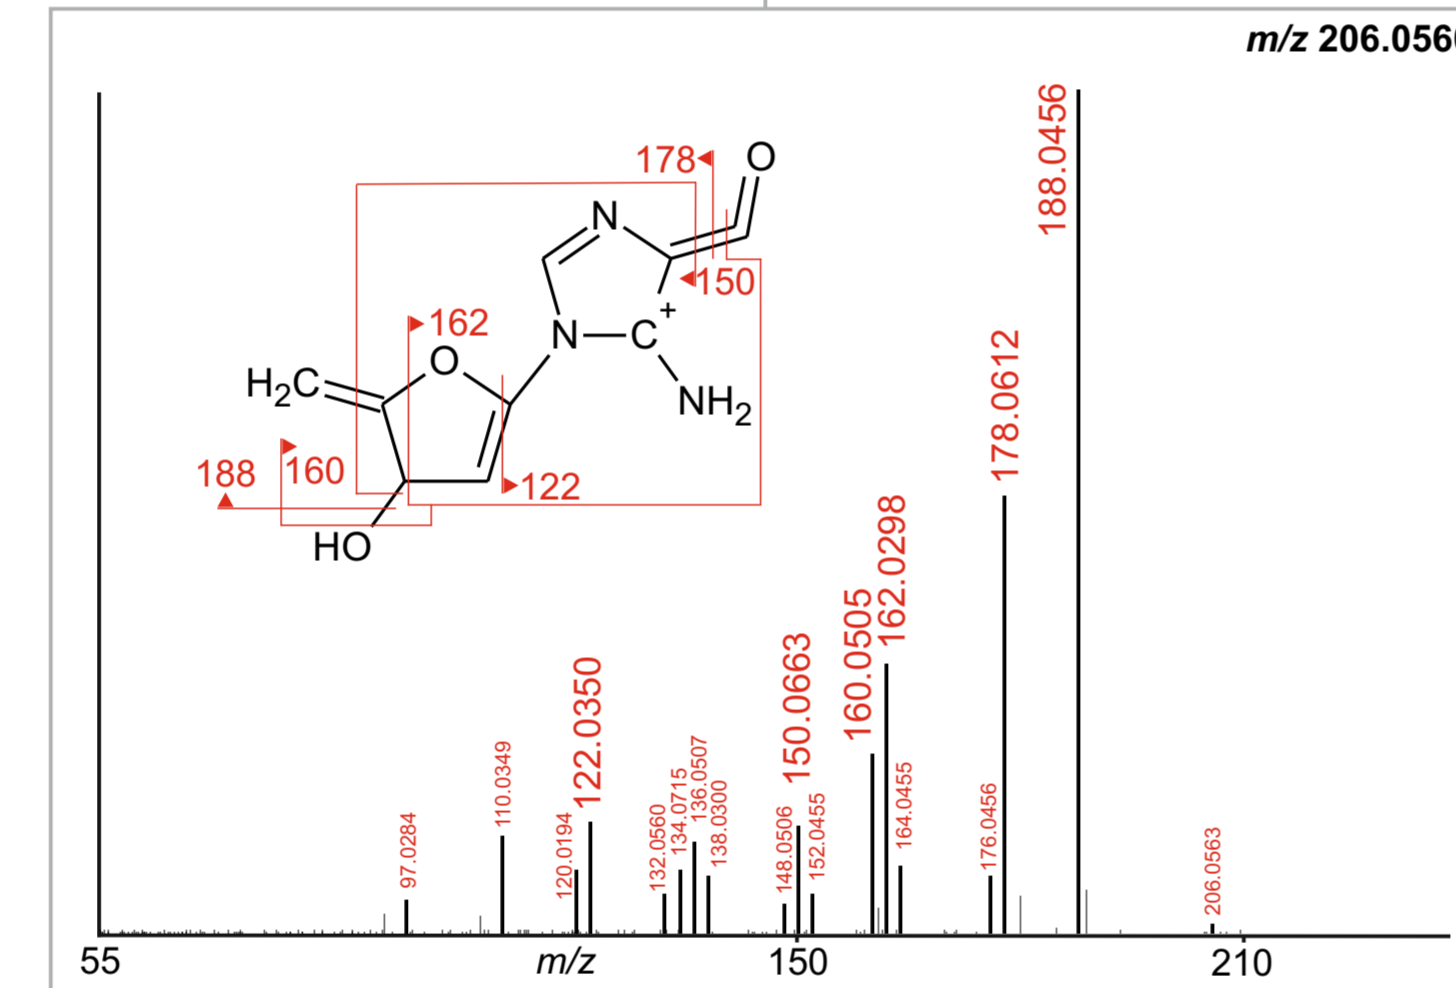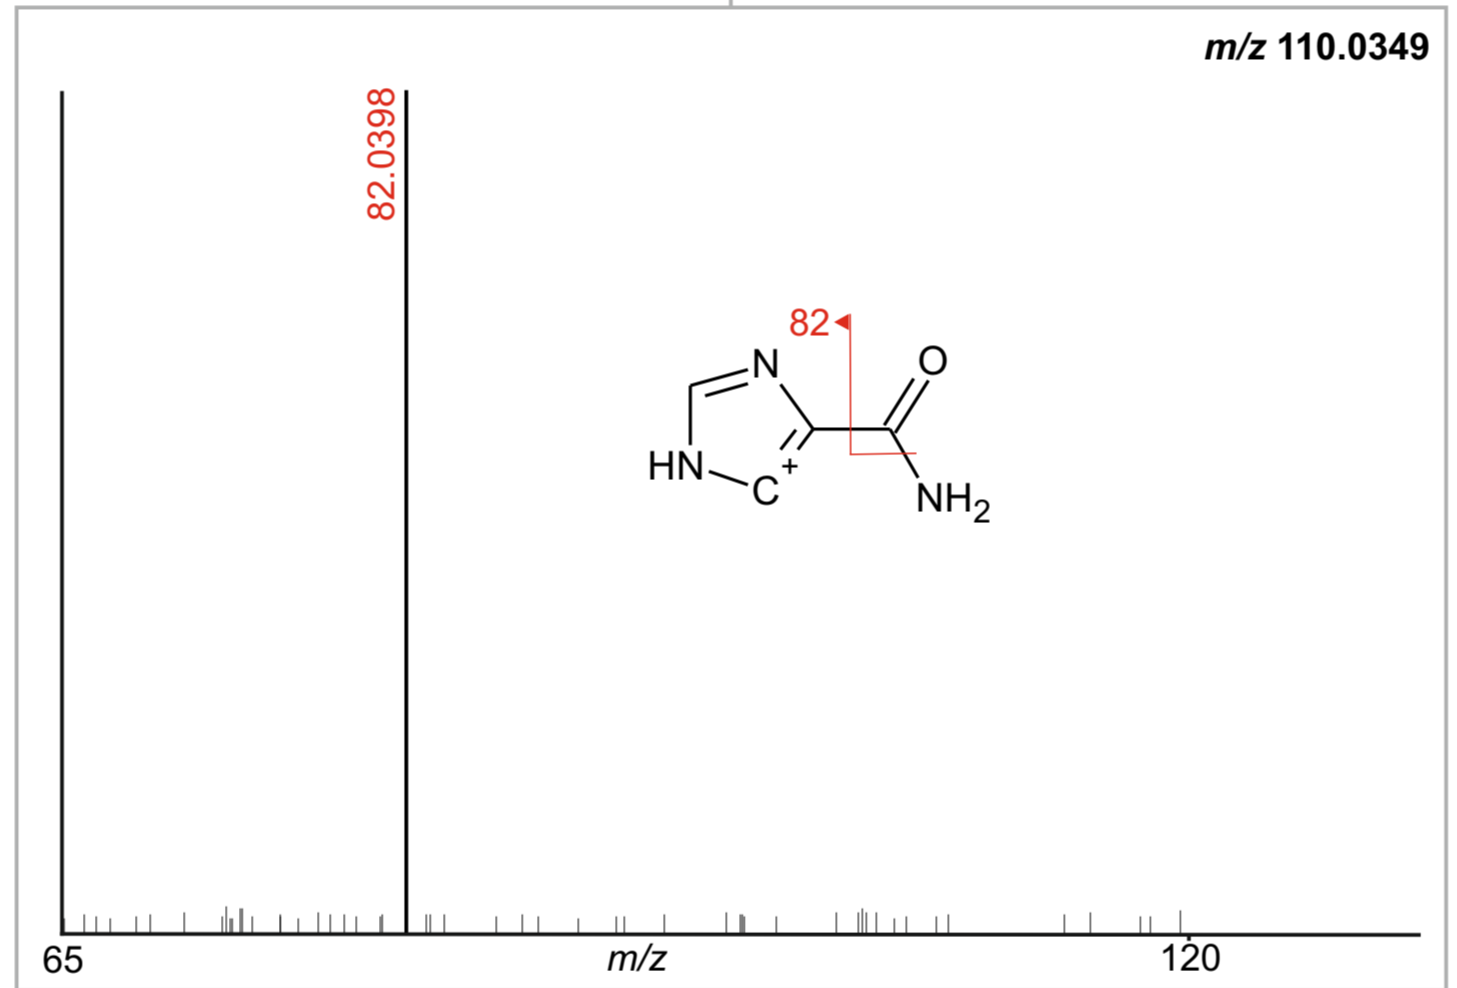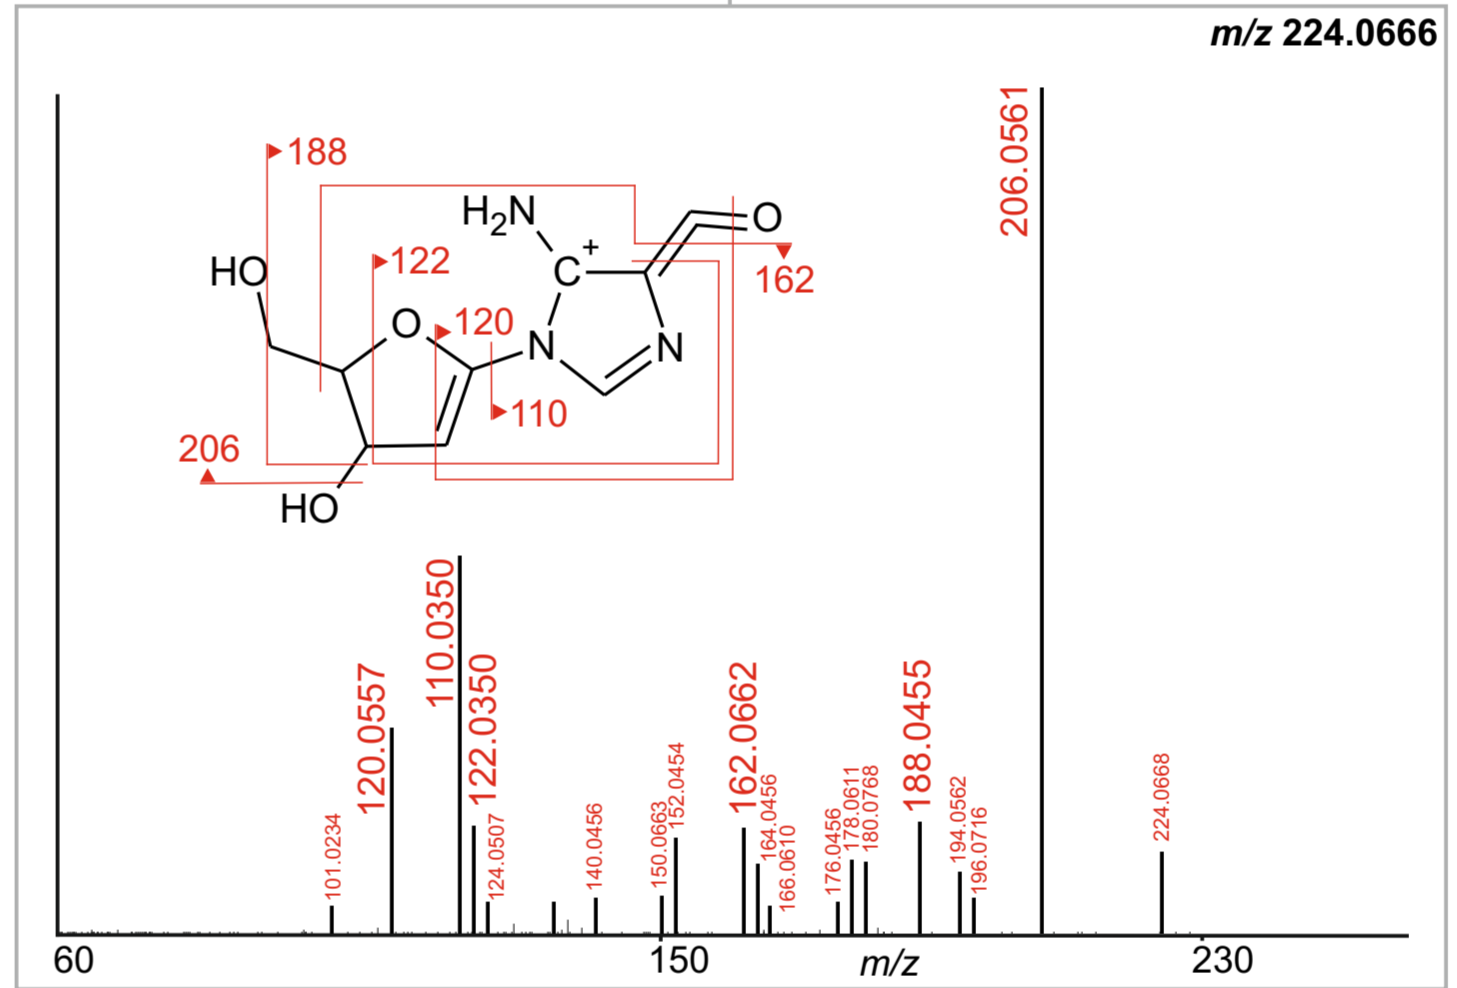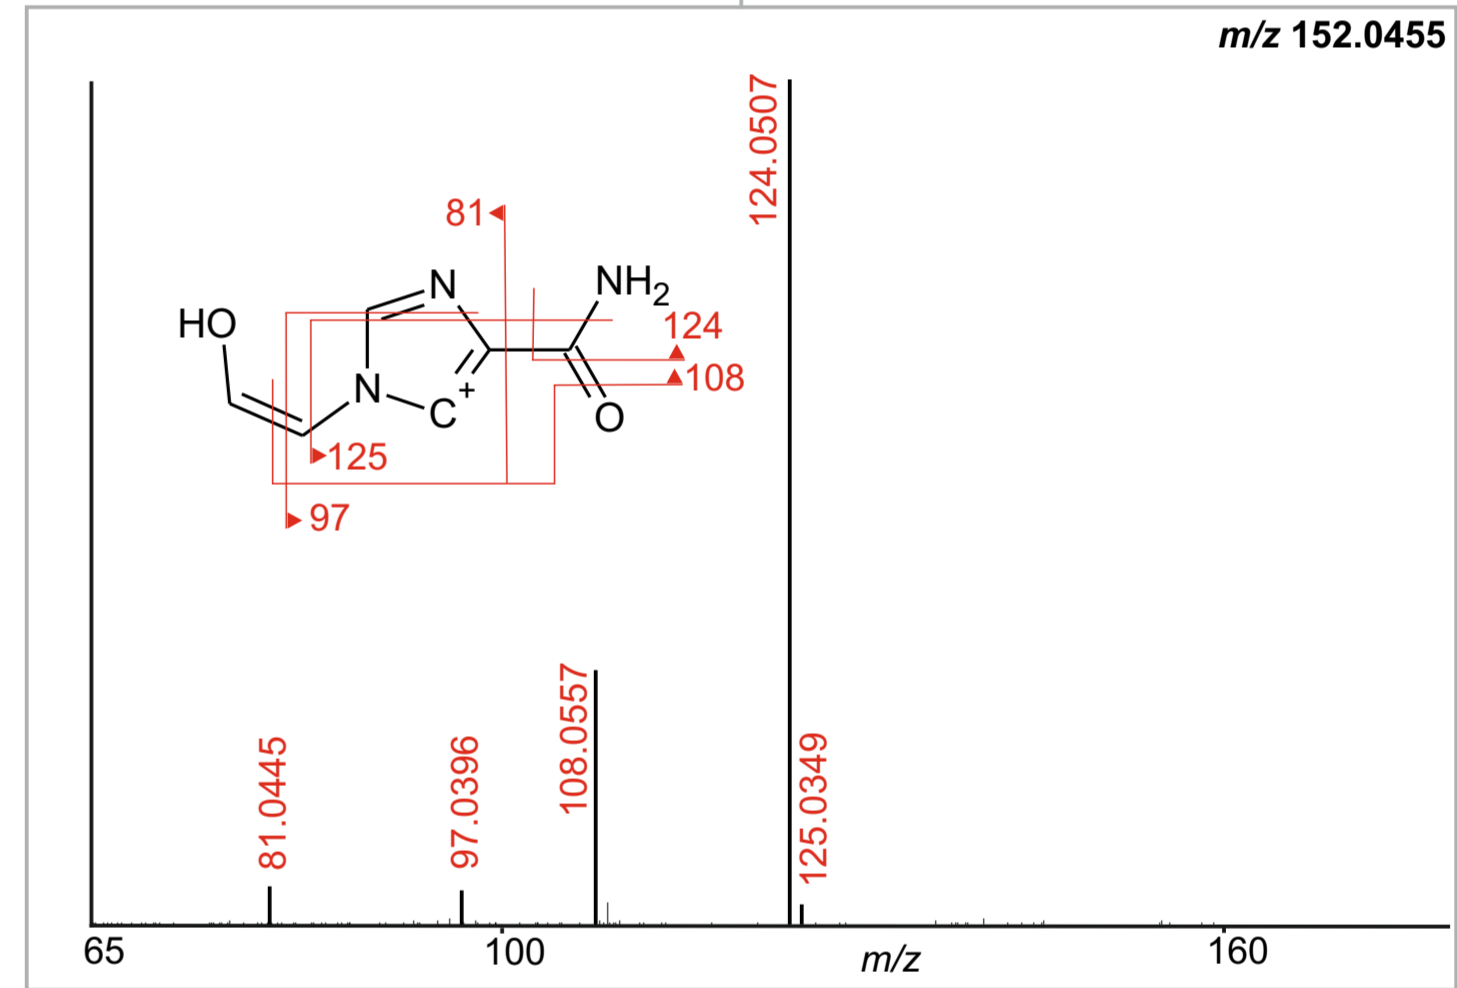

MS<sup>5</sup>

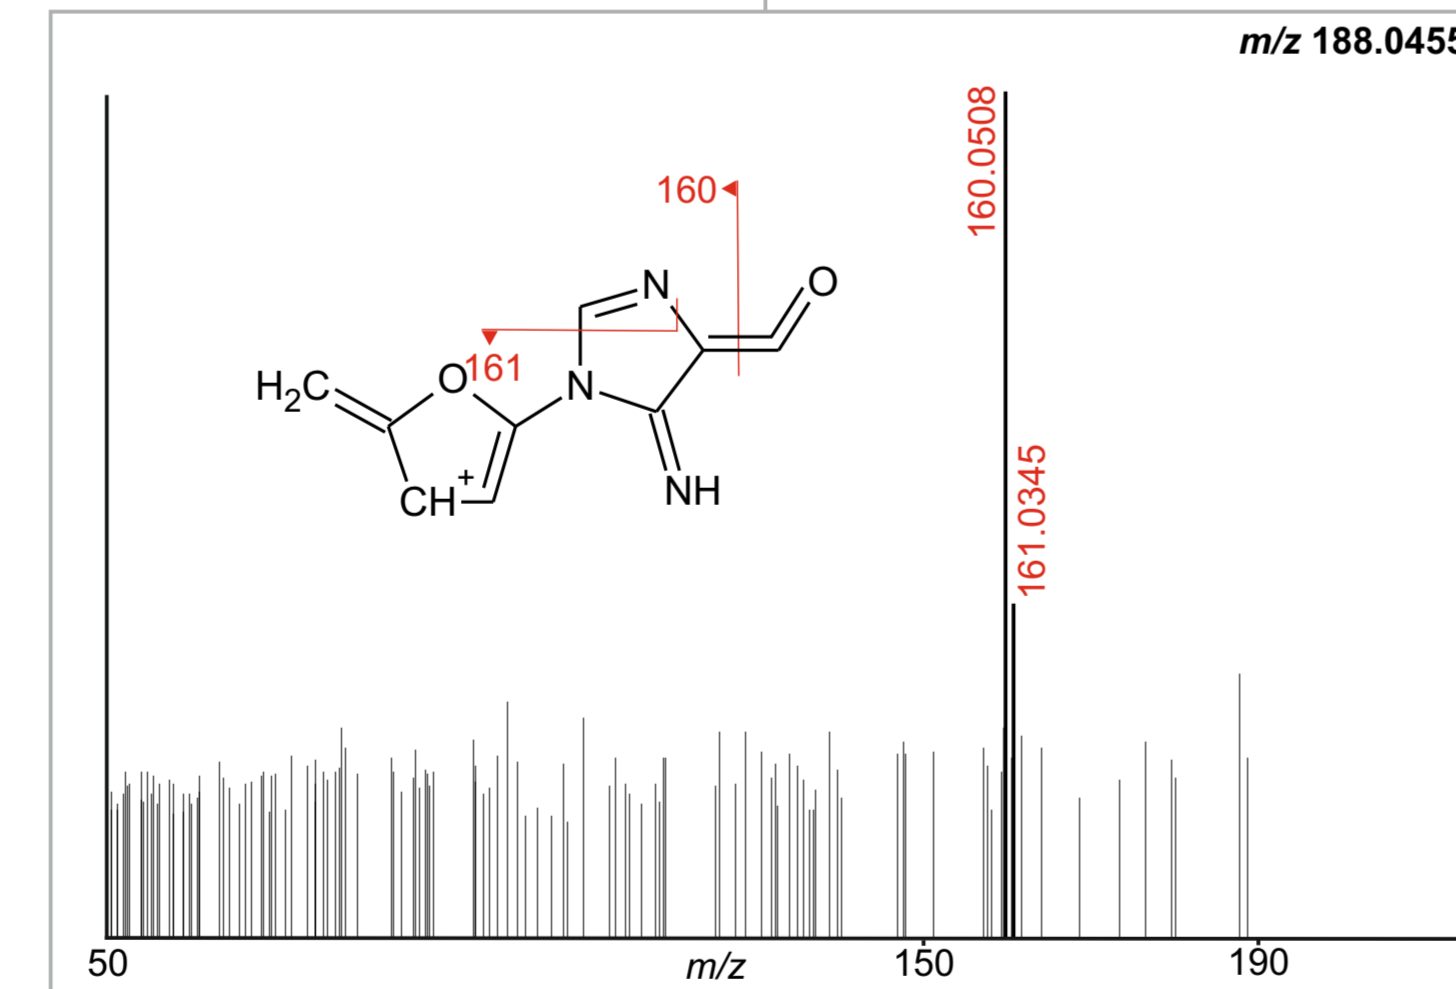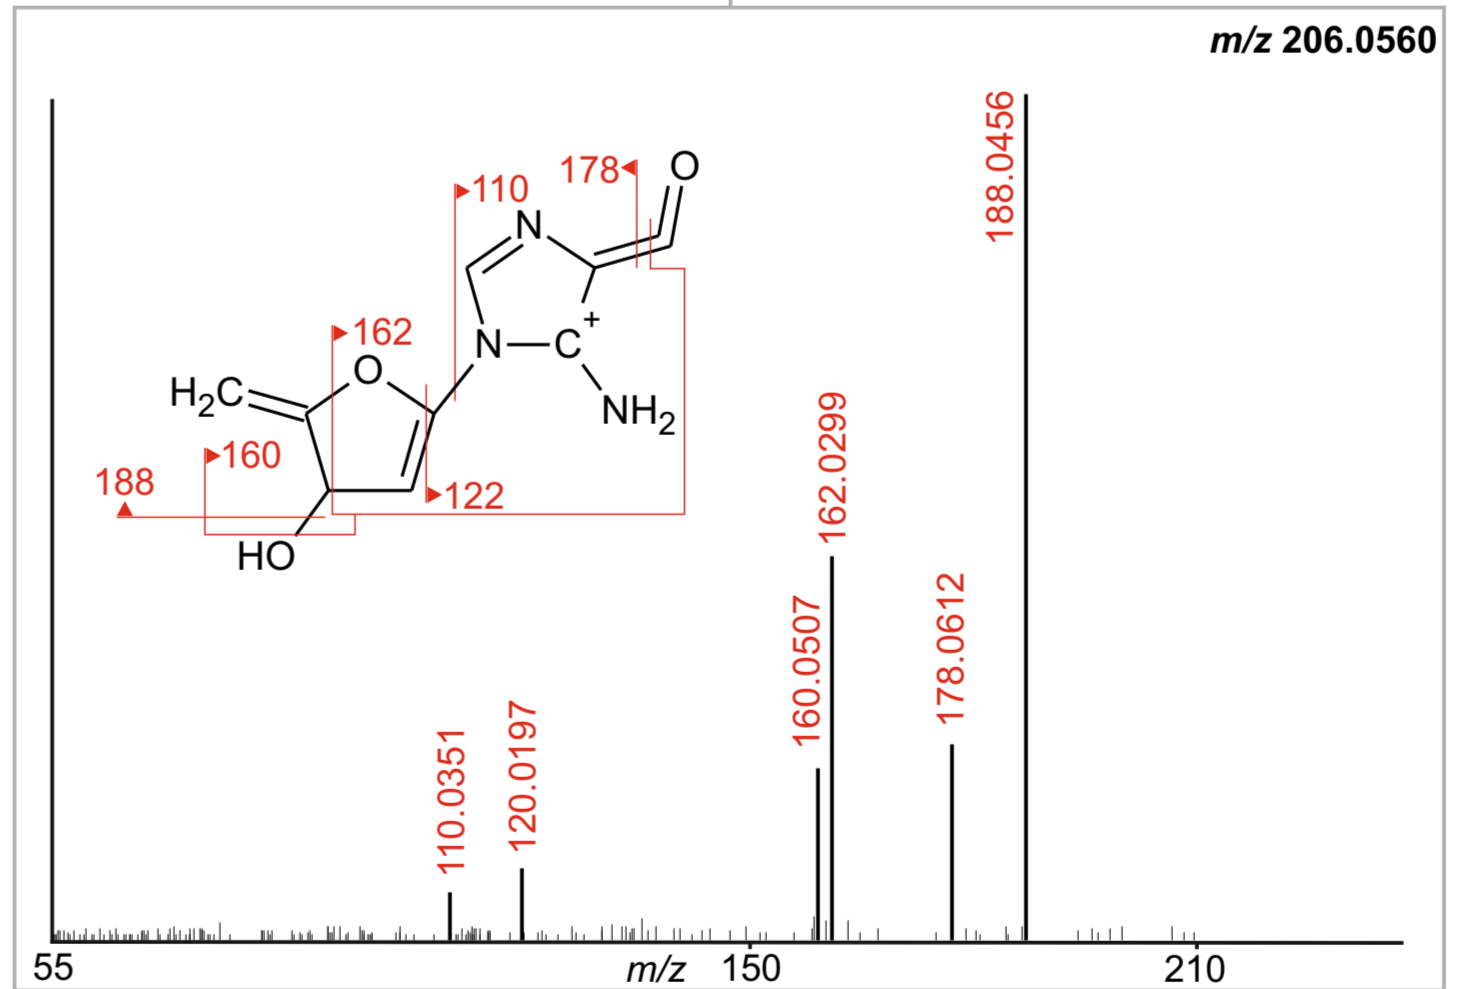

MS<sup>6</sup>

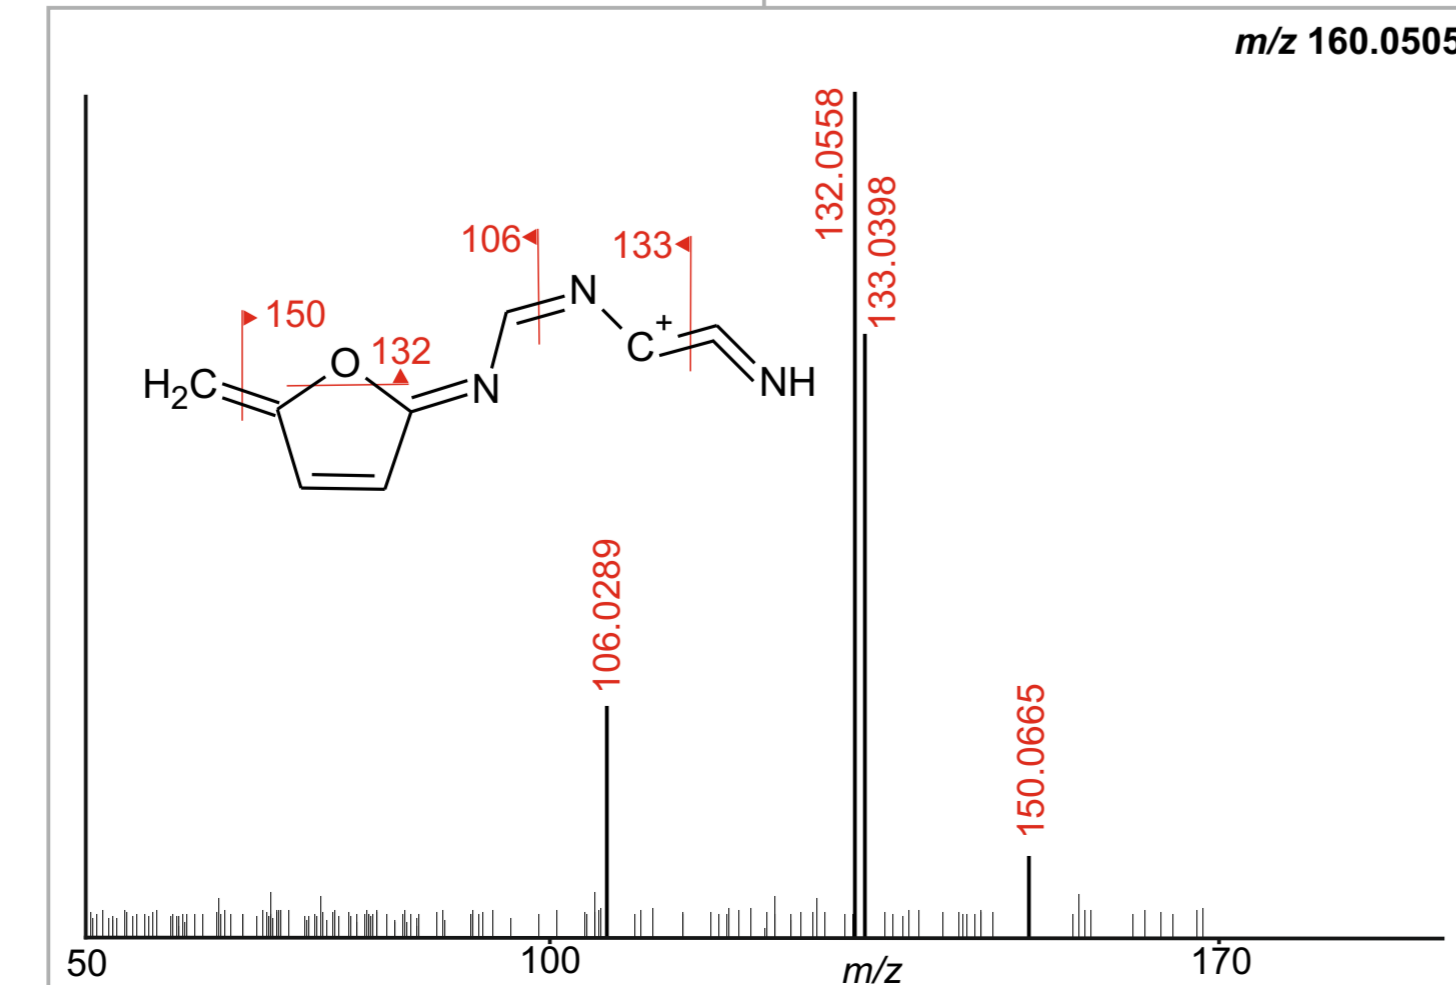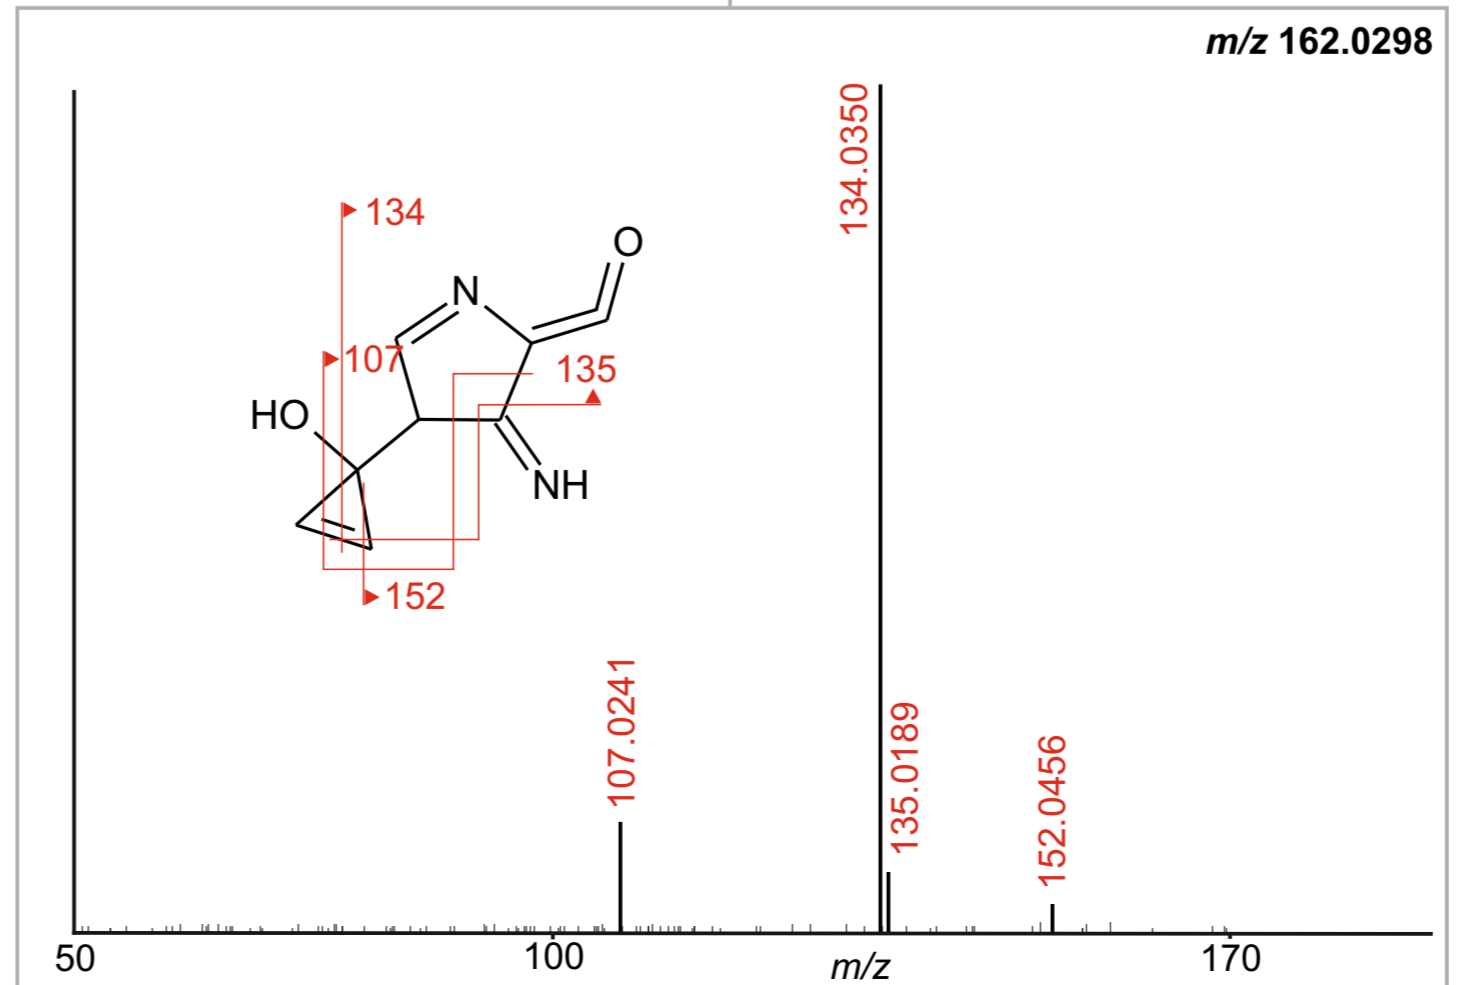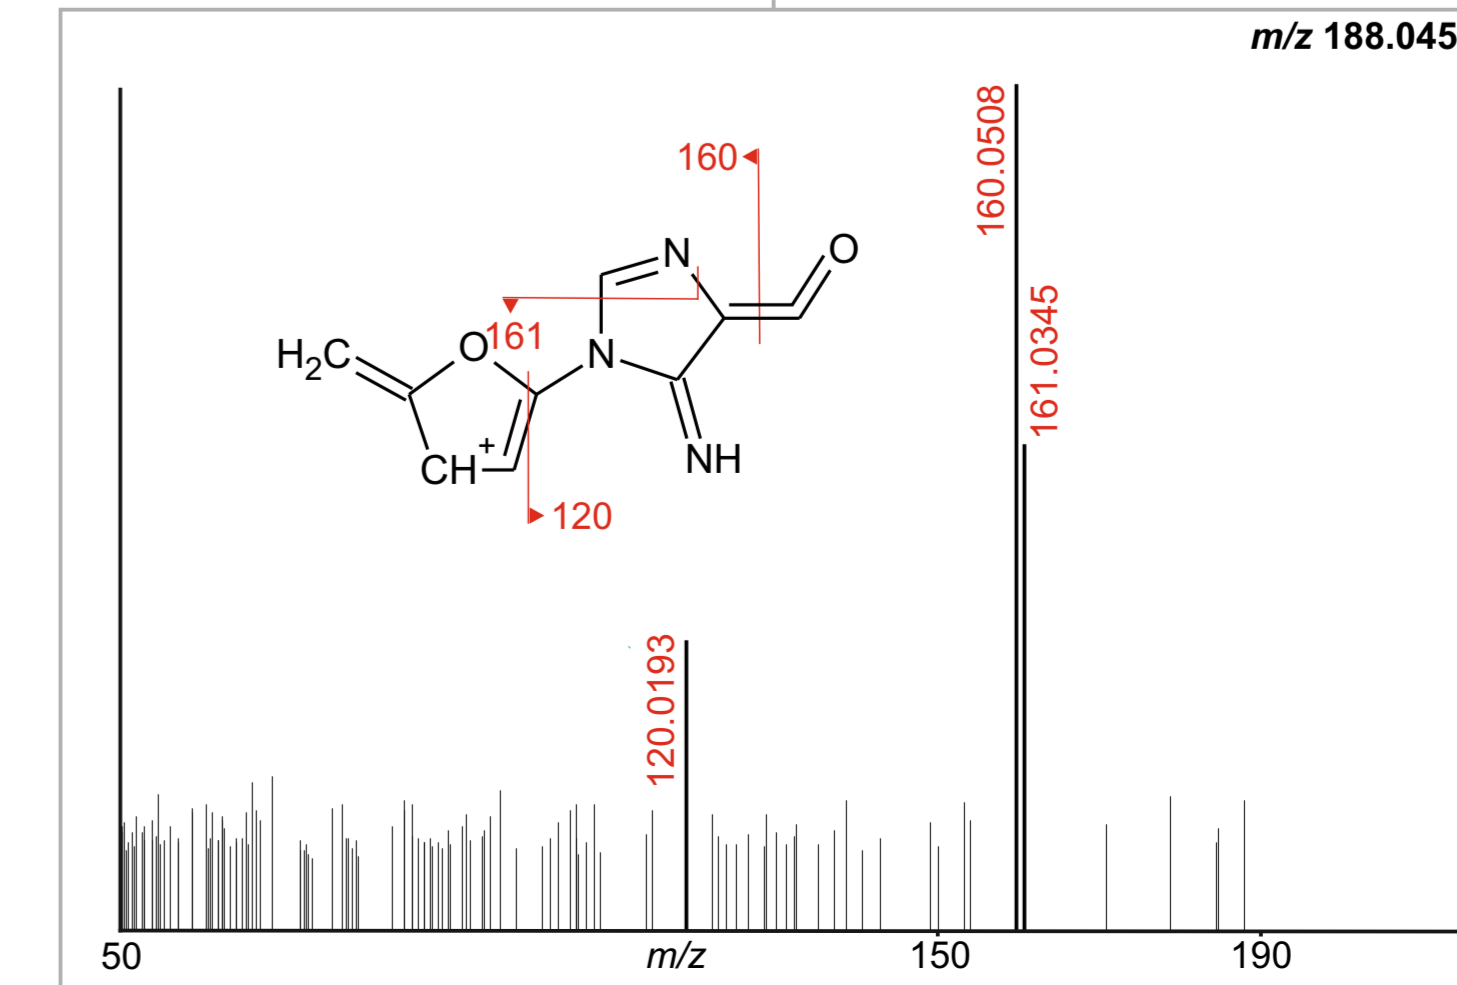

# AICAR

*m/z* 339.0700

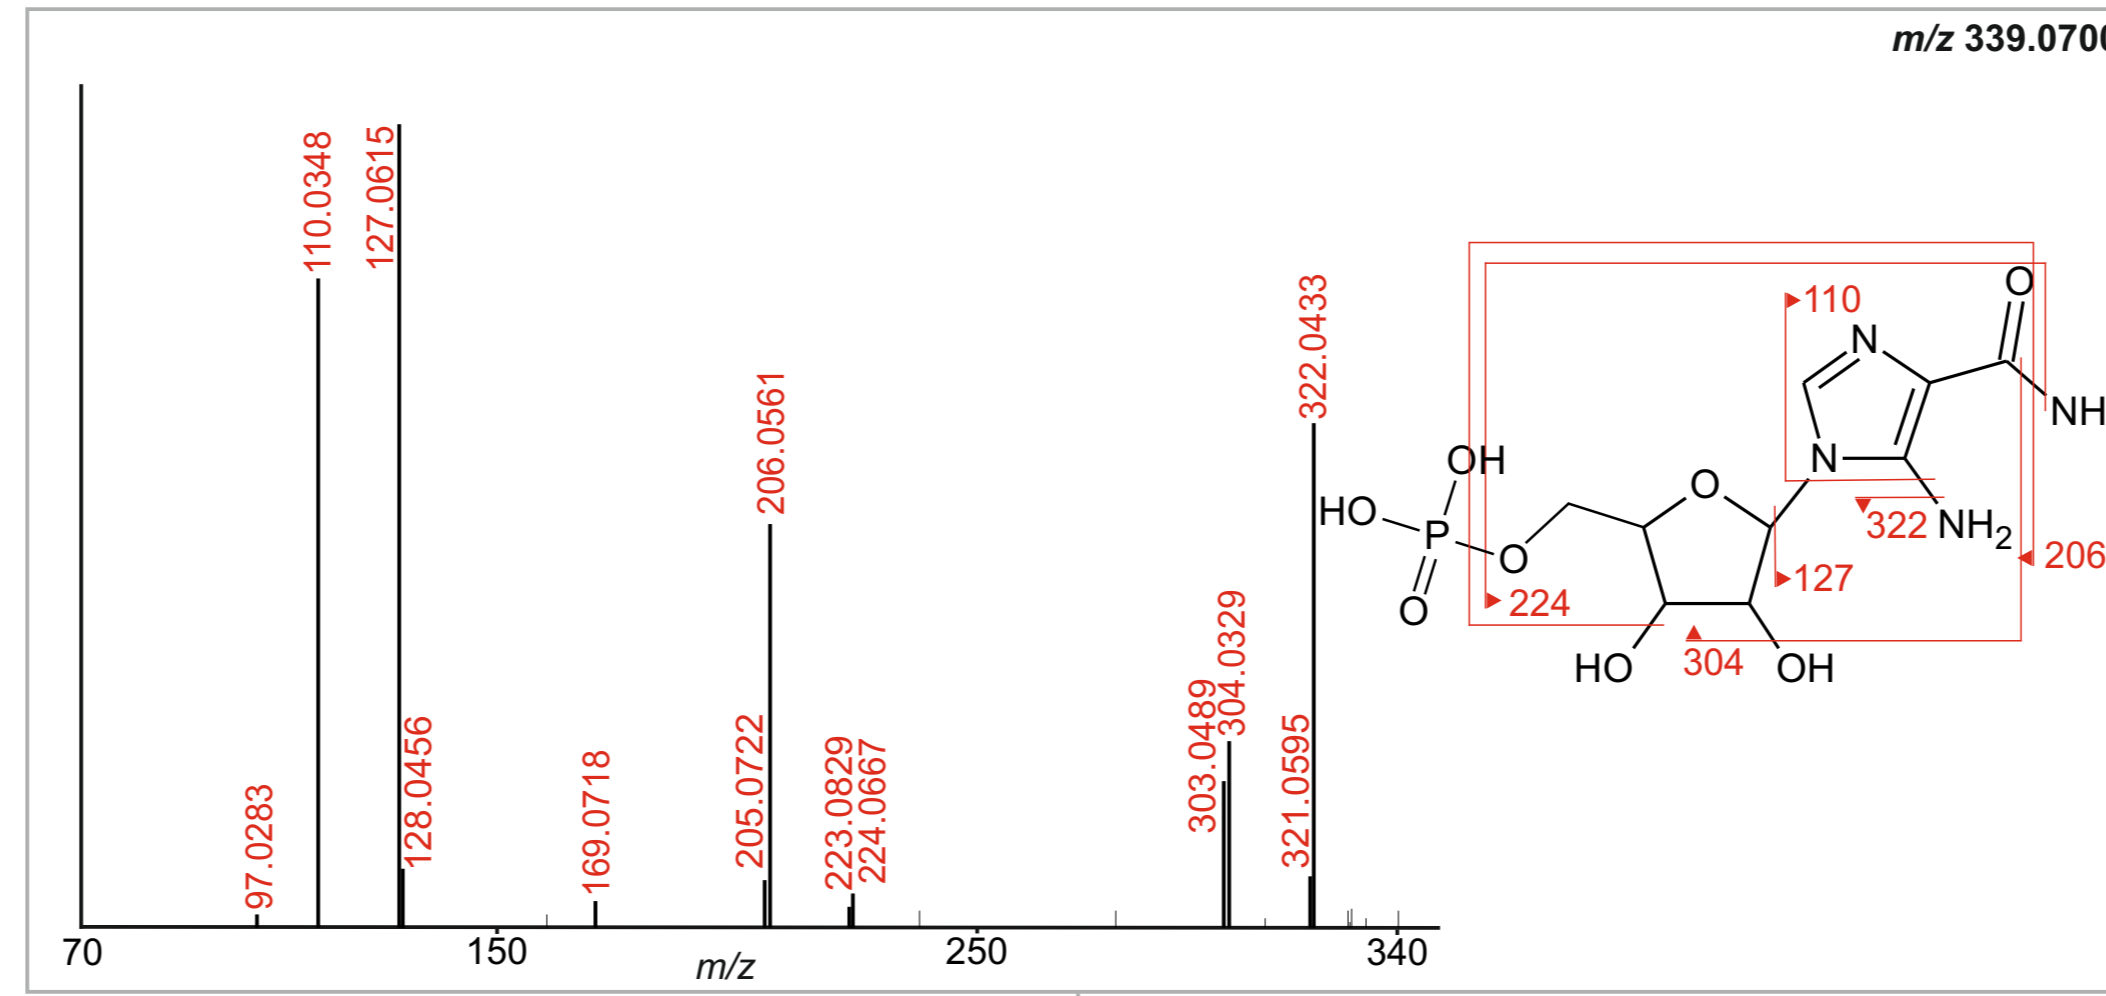

MS<sup>2</sup>

MS<sup>3</sup>

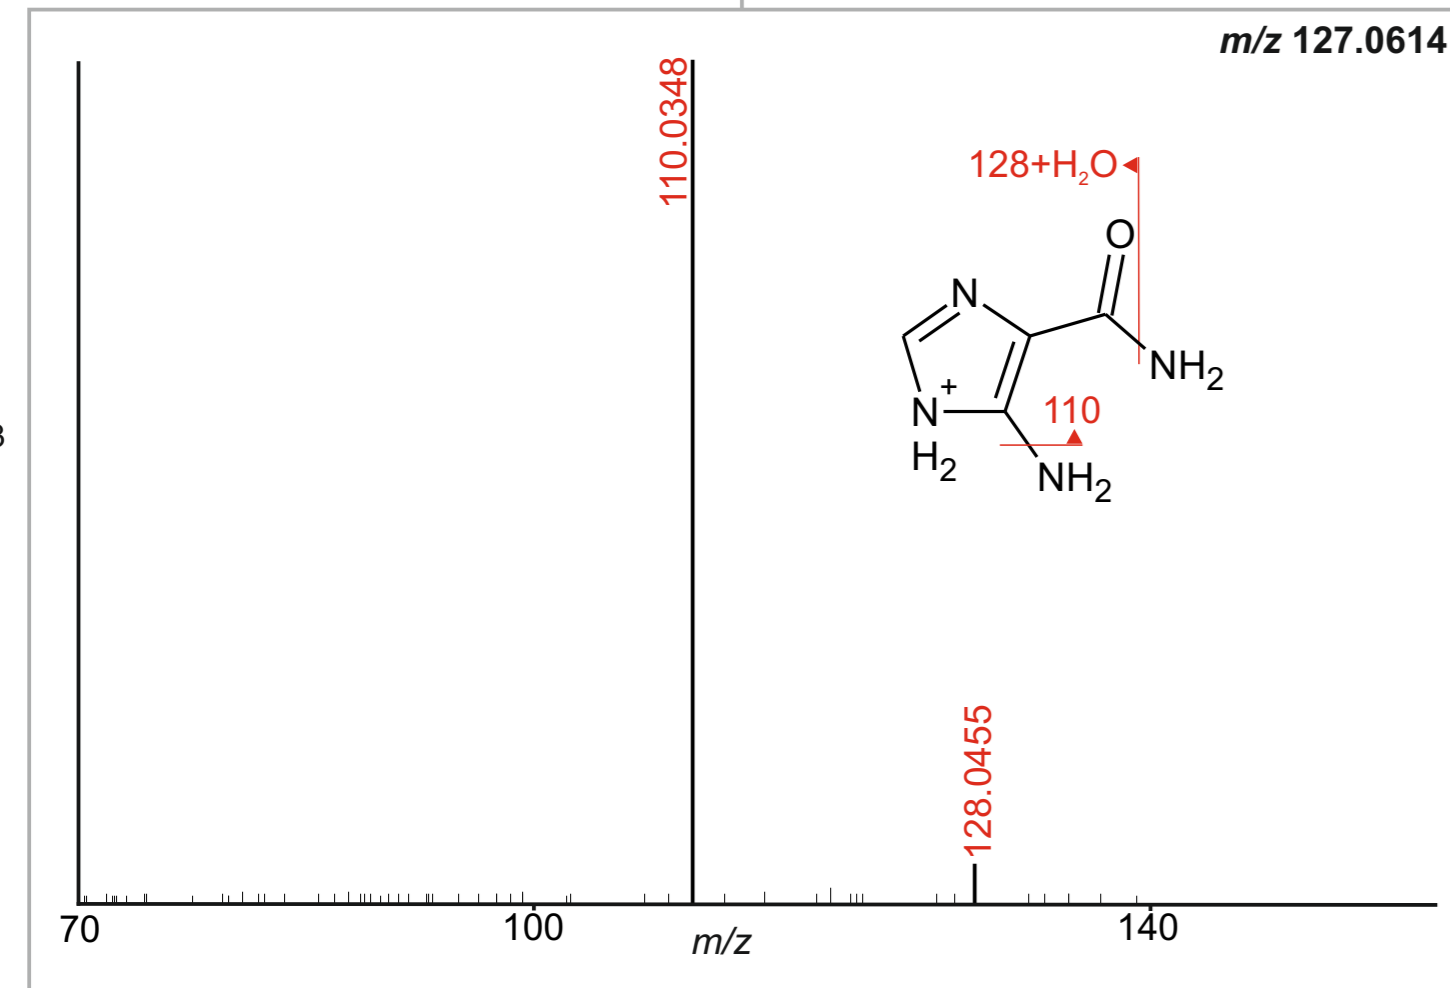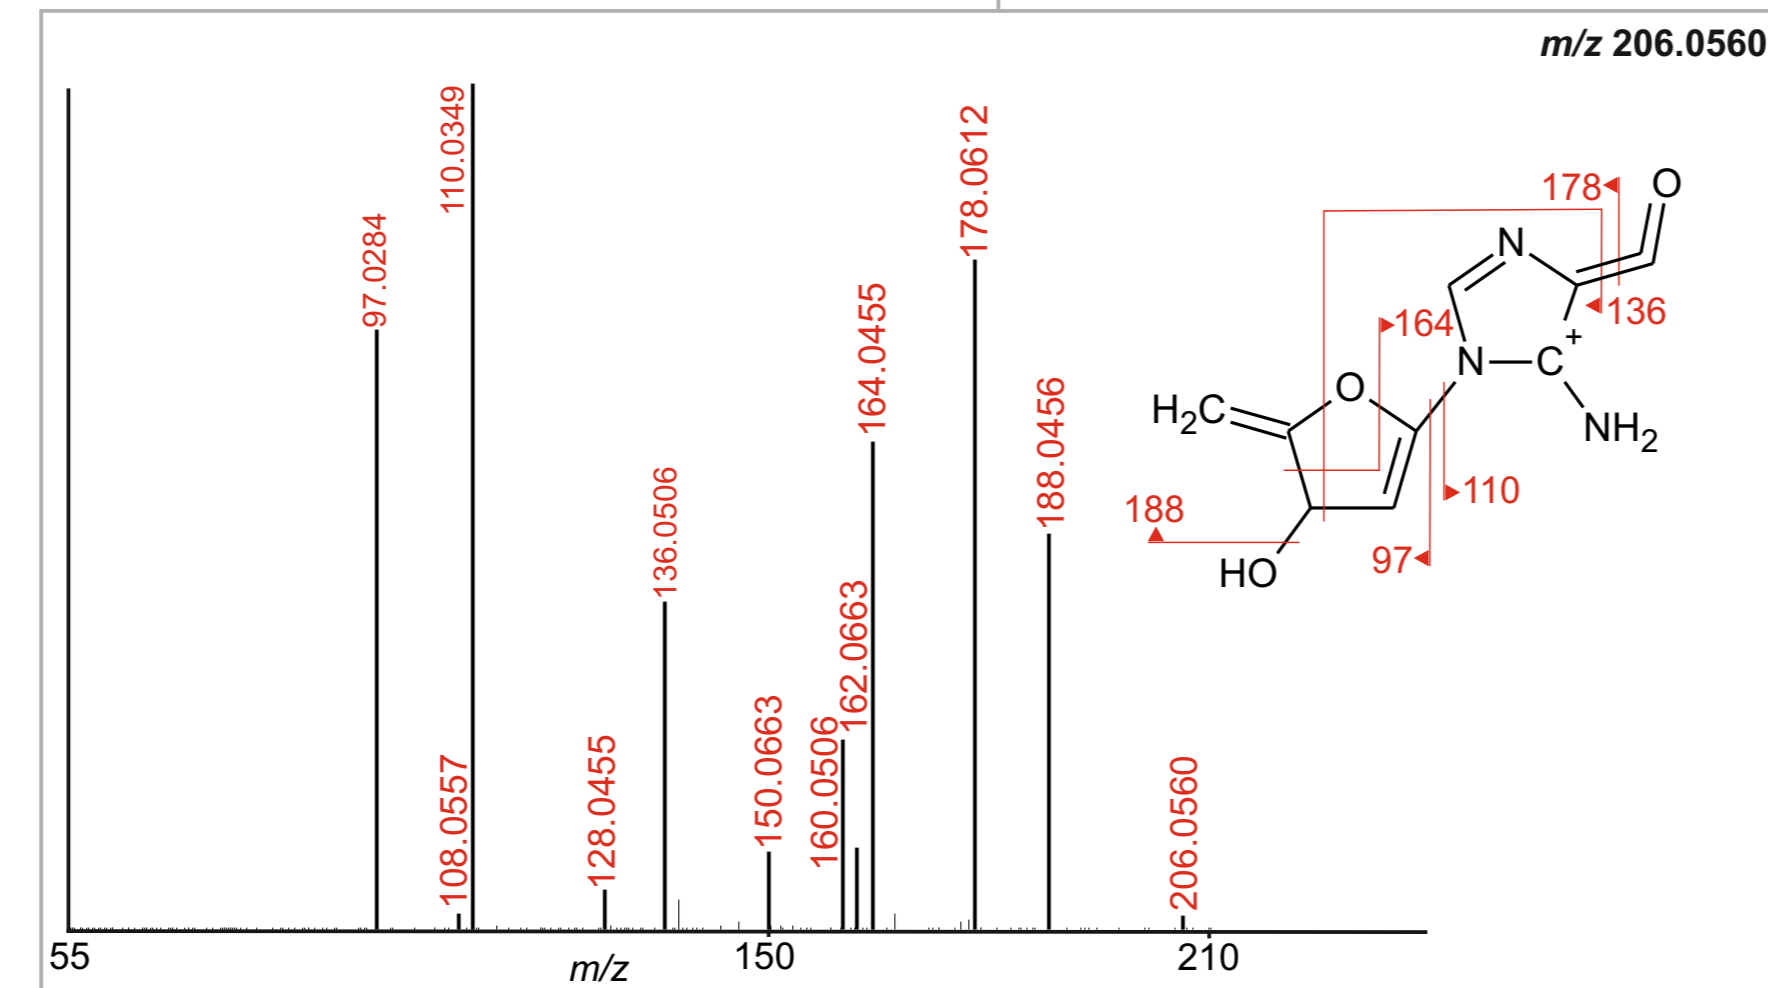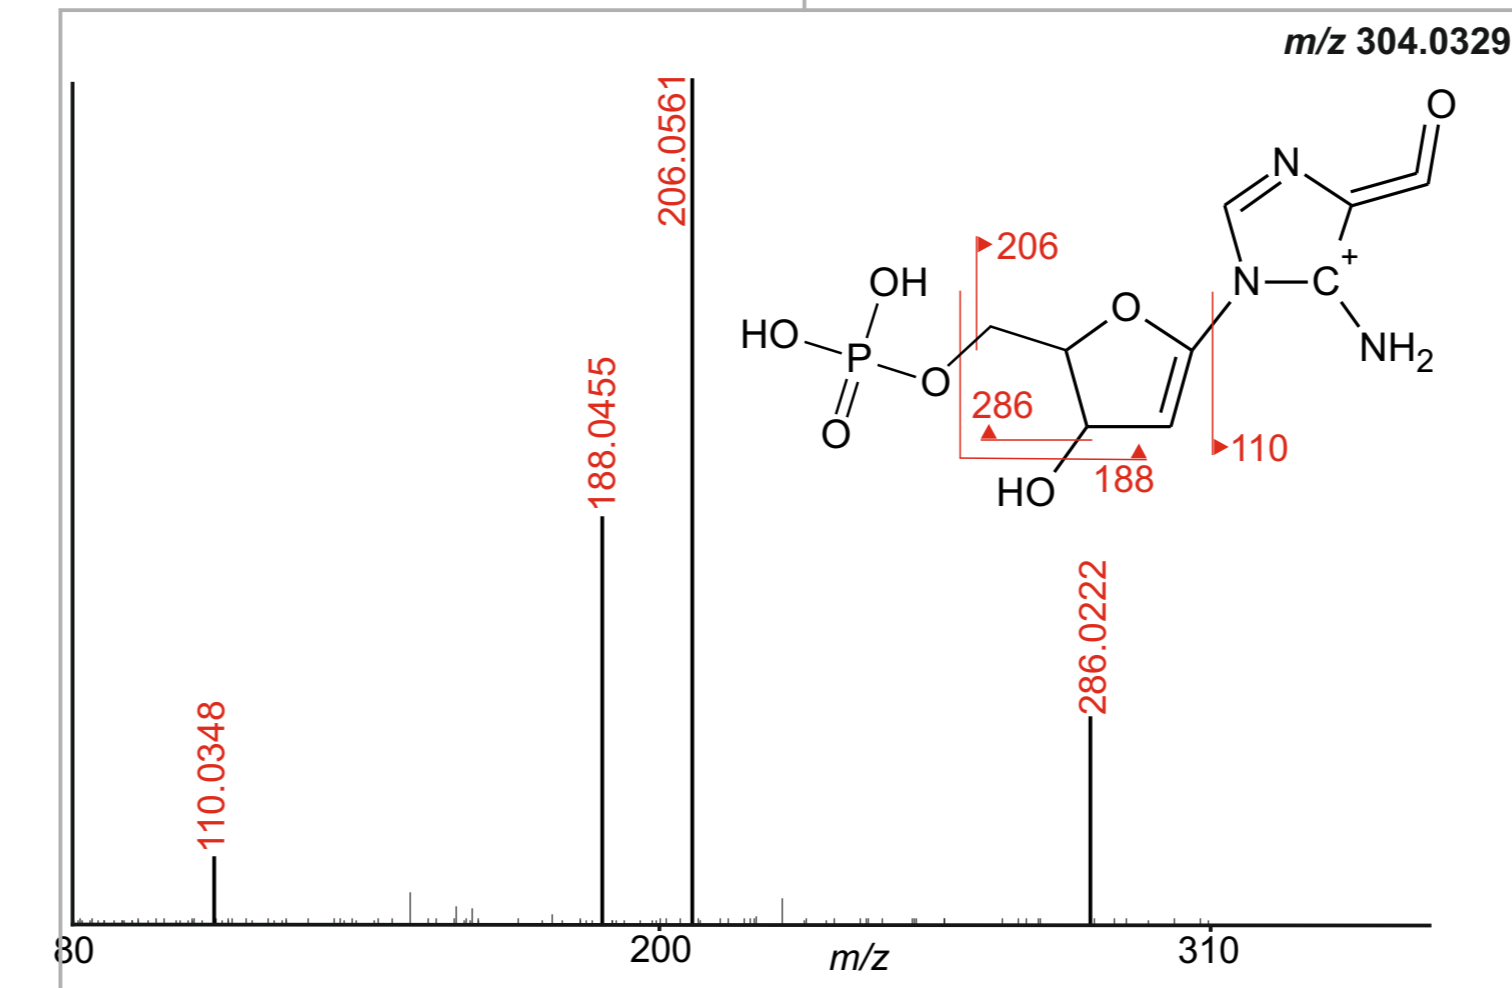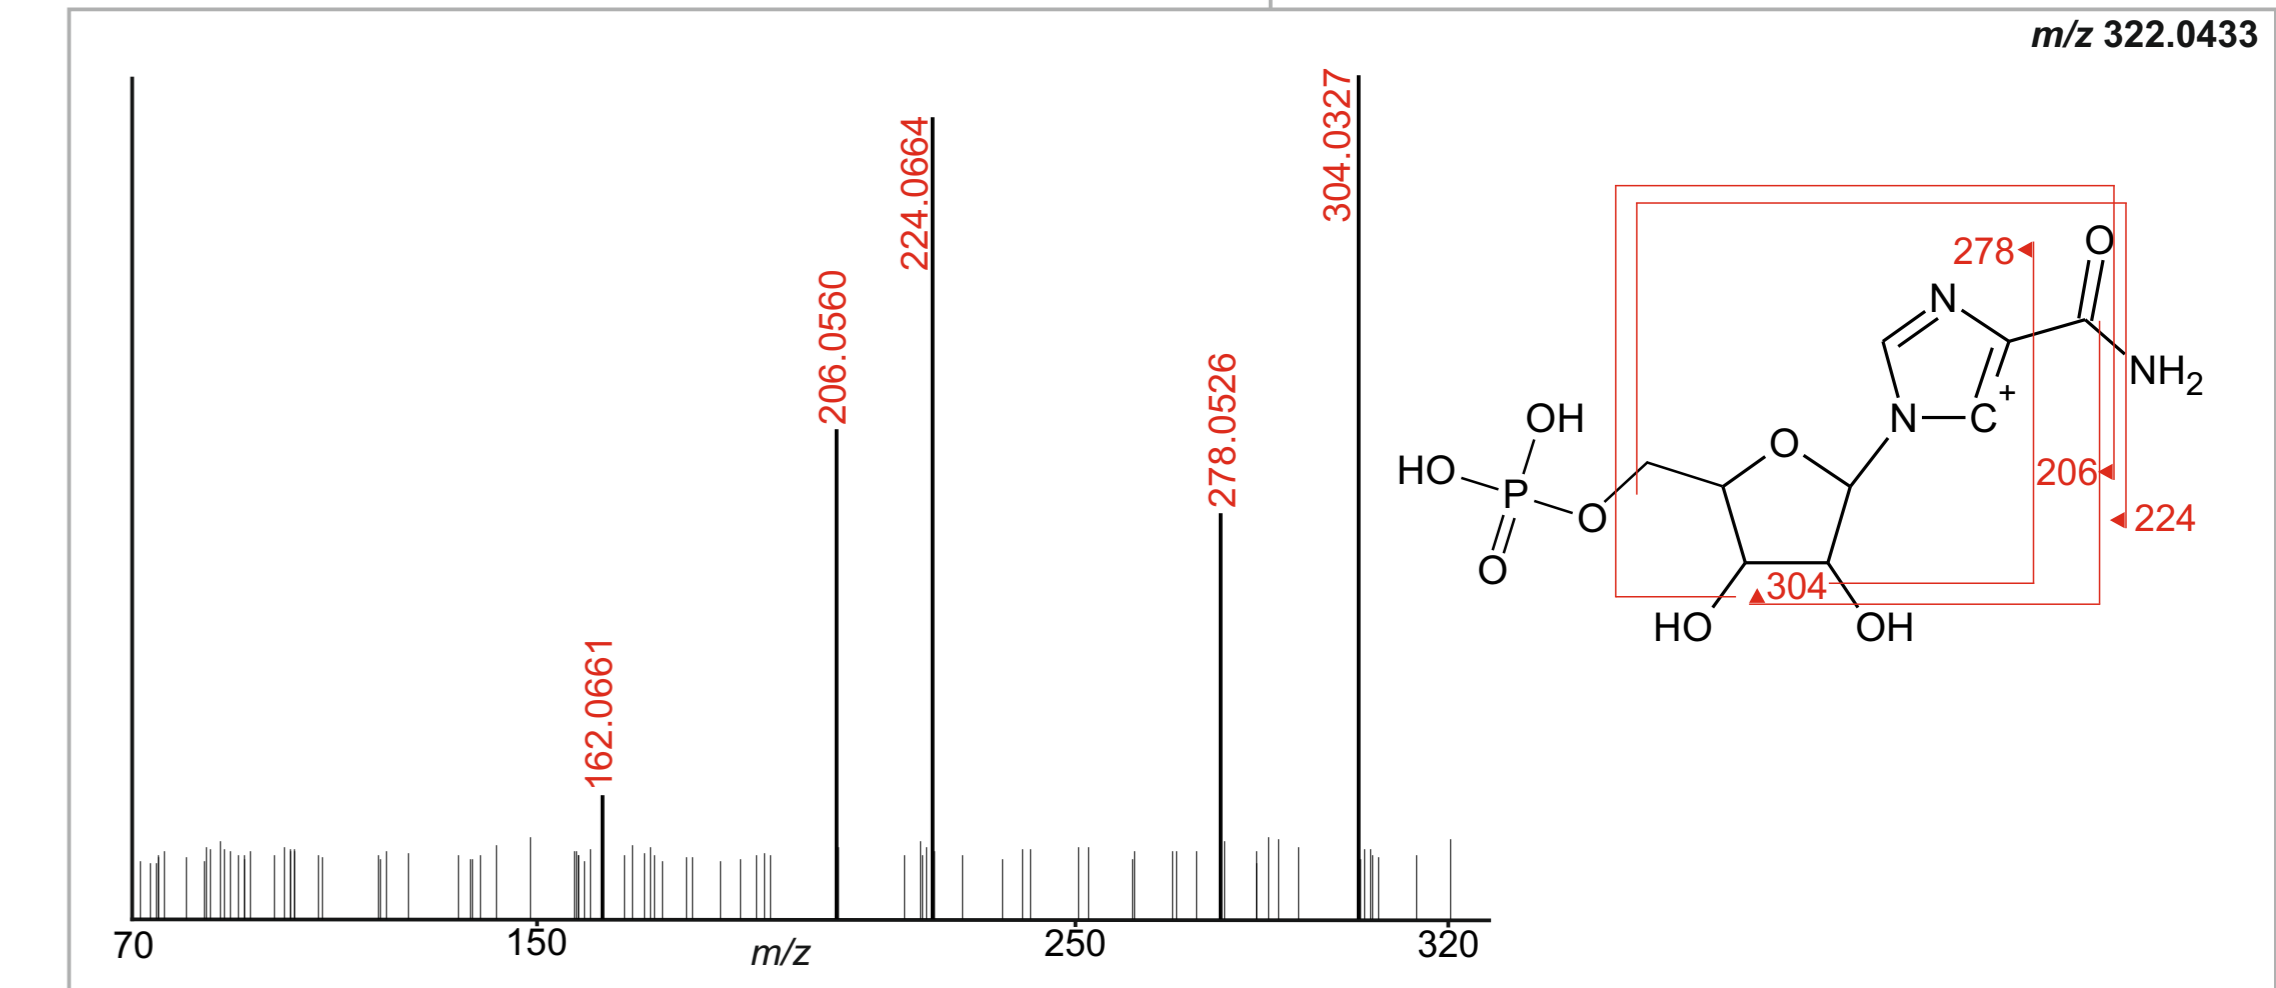

MS<sup>4</sup>

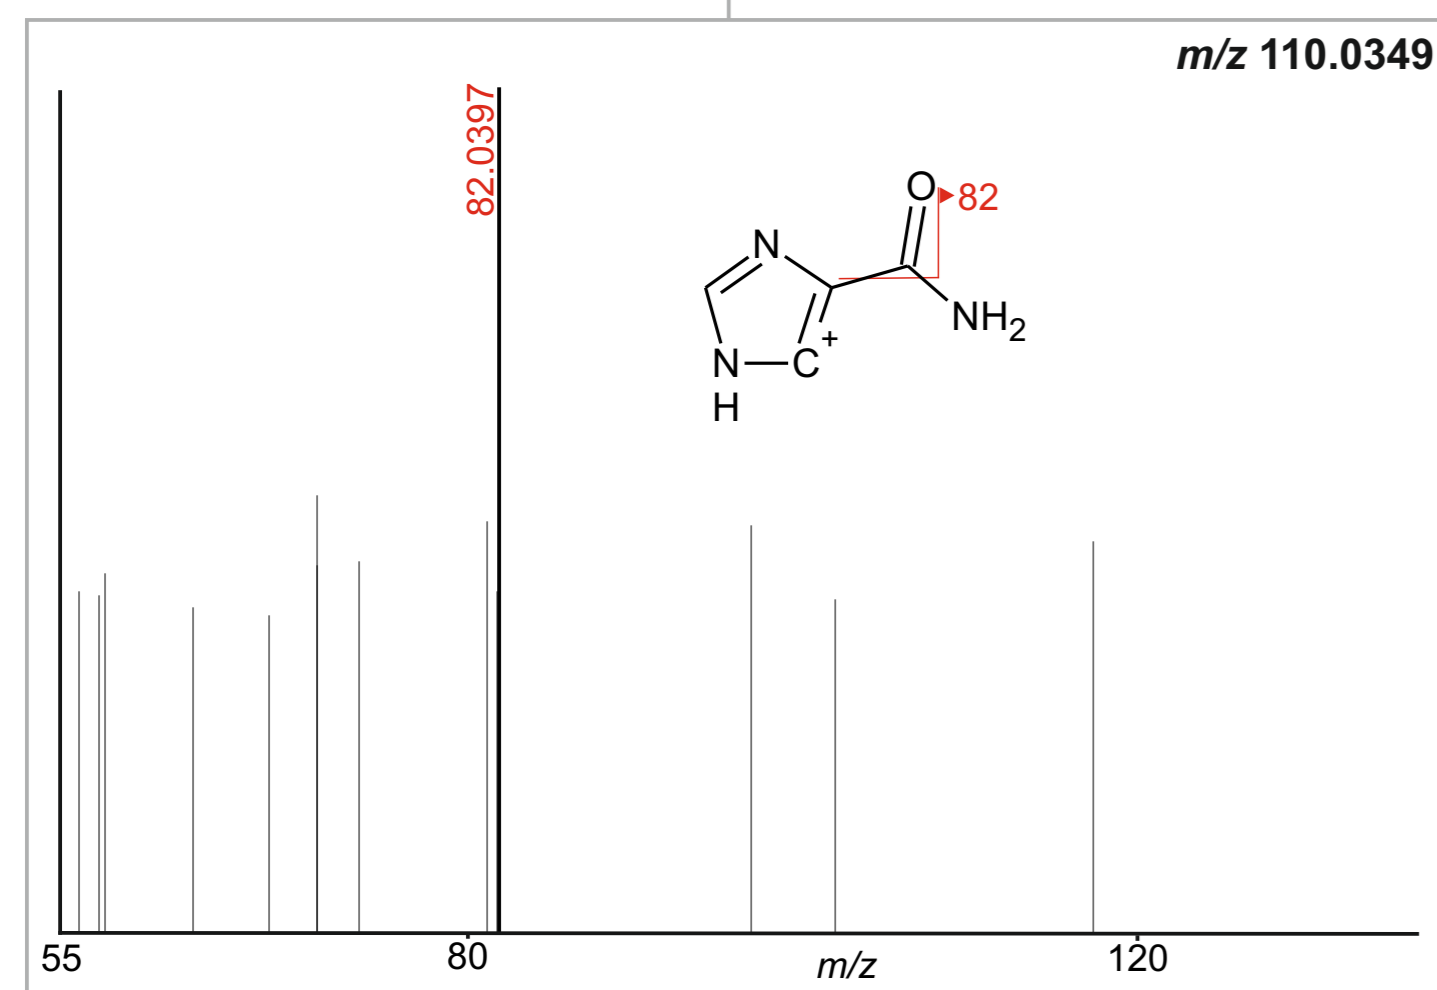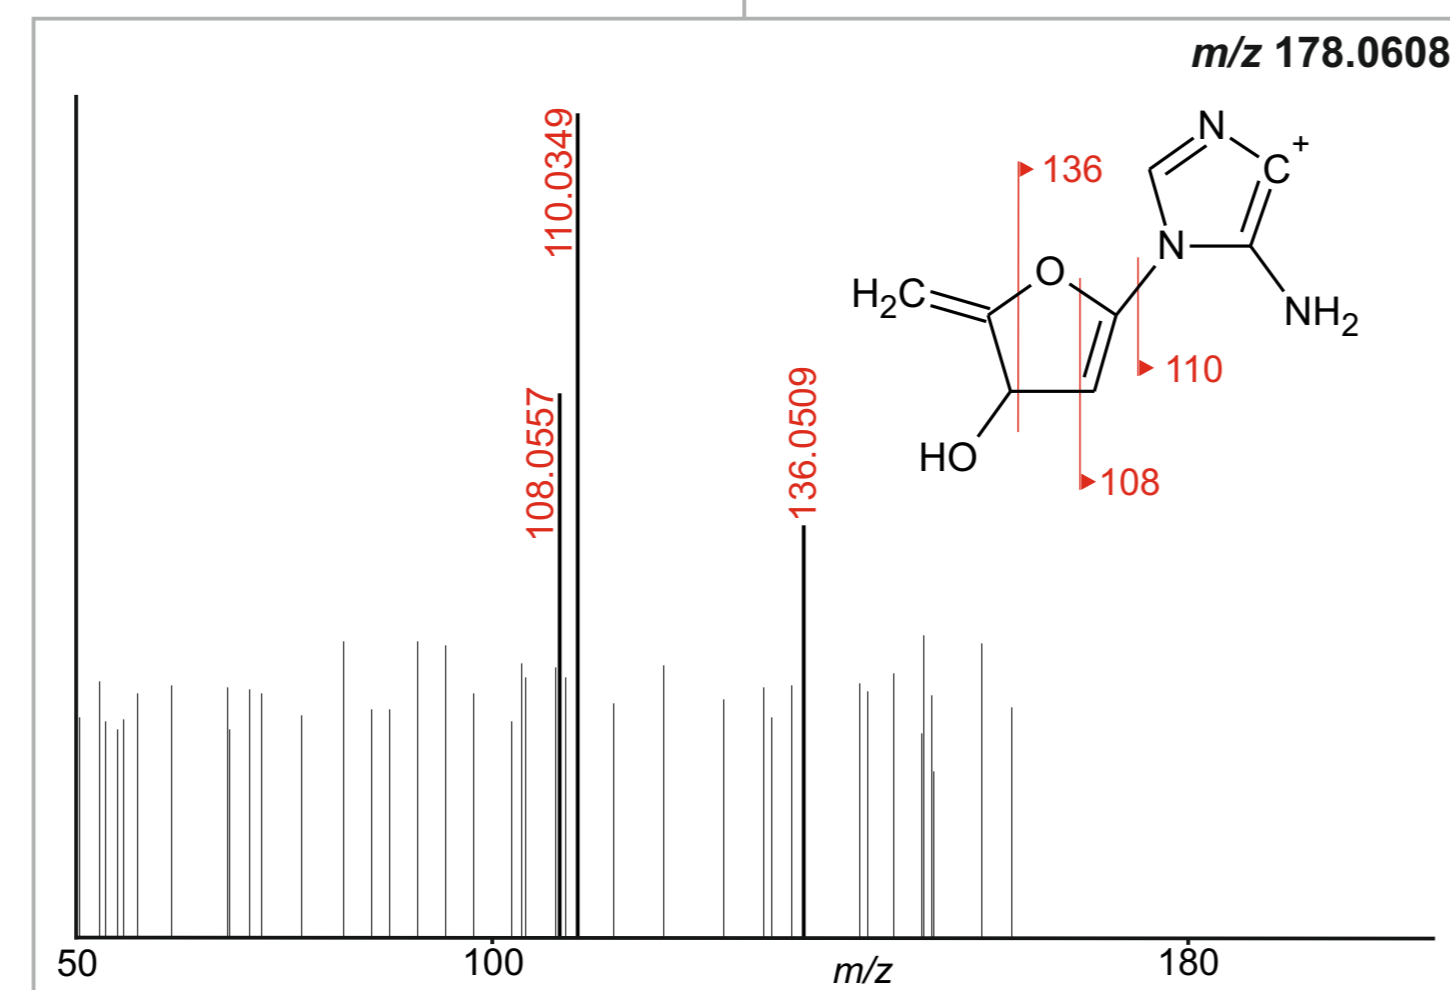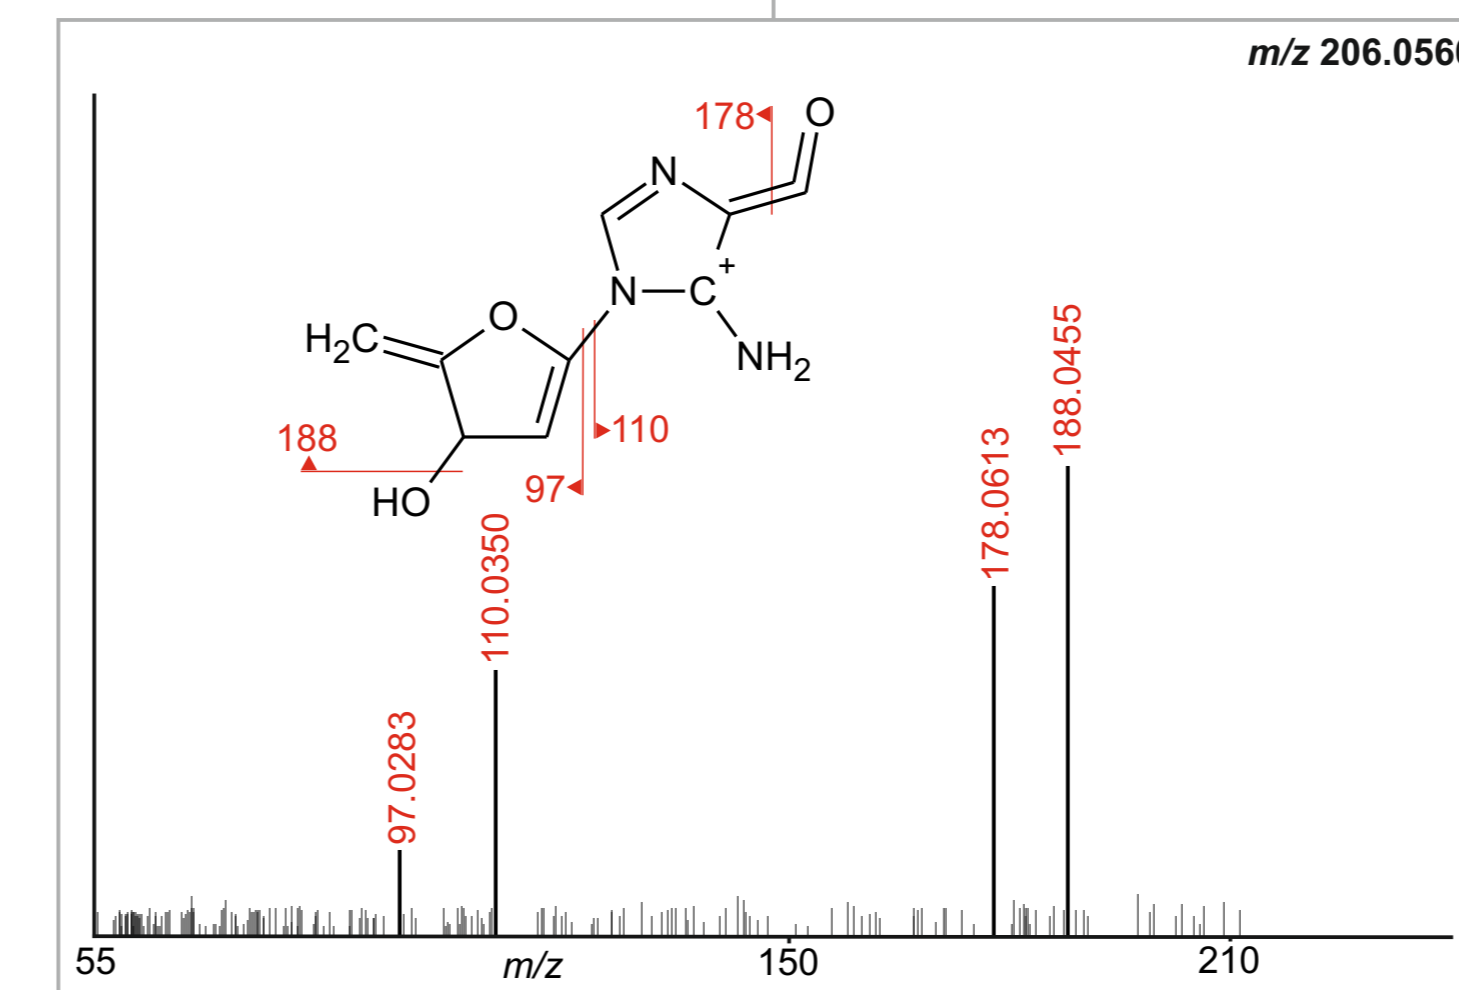

# FAICAr

MS<sup>2</sup>

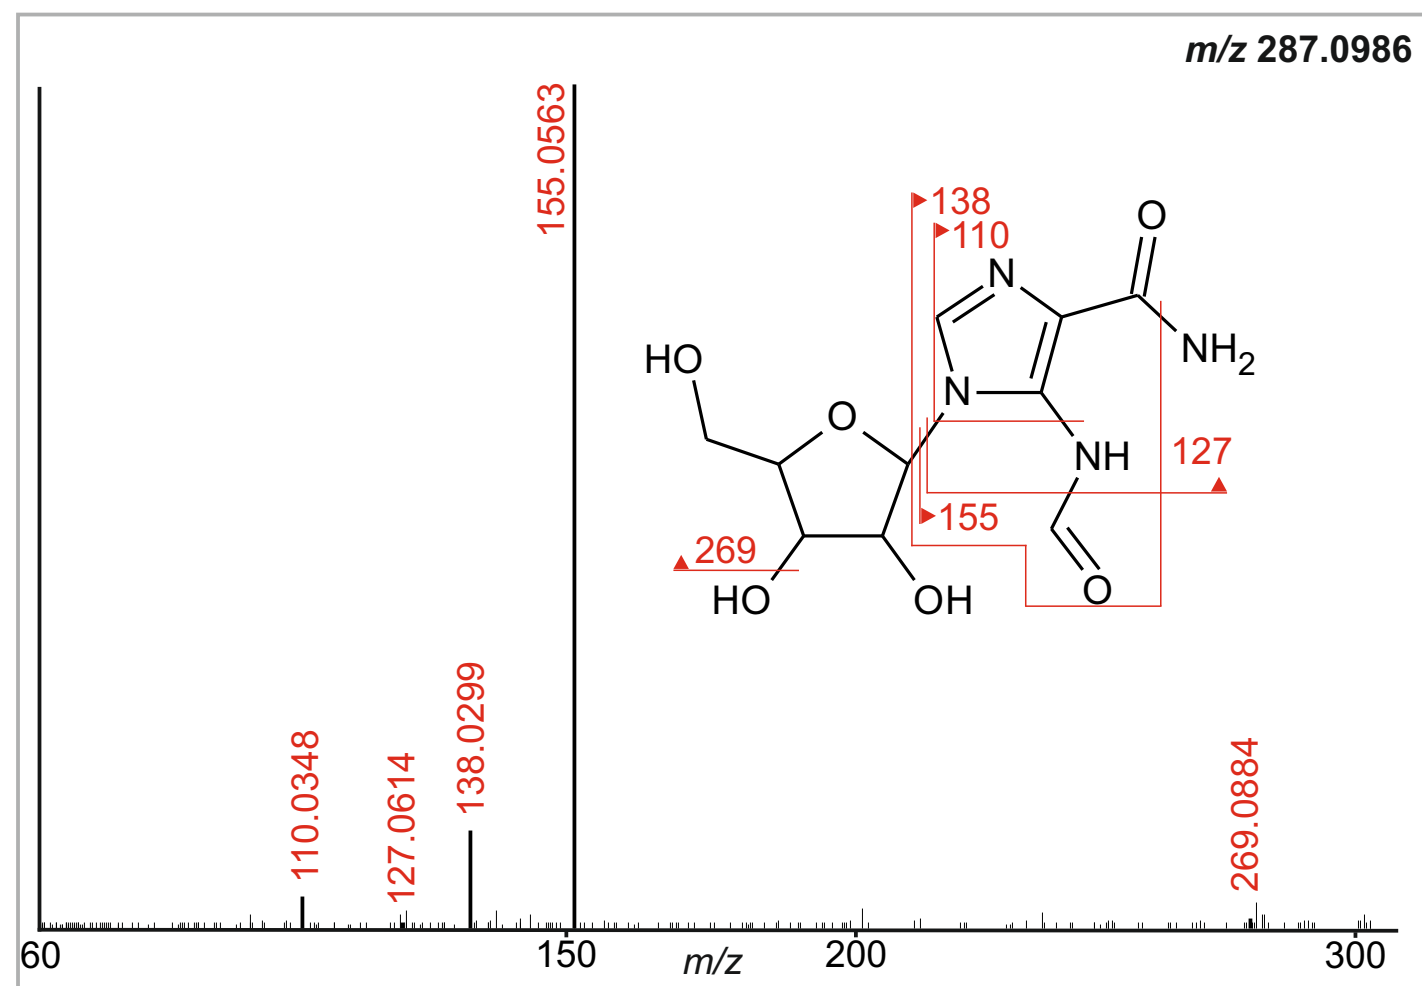

MS<sup>3</sup>

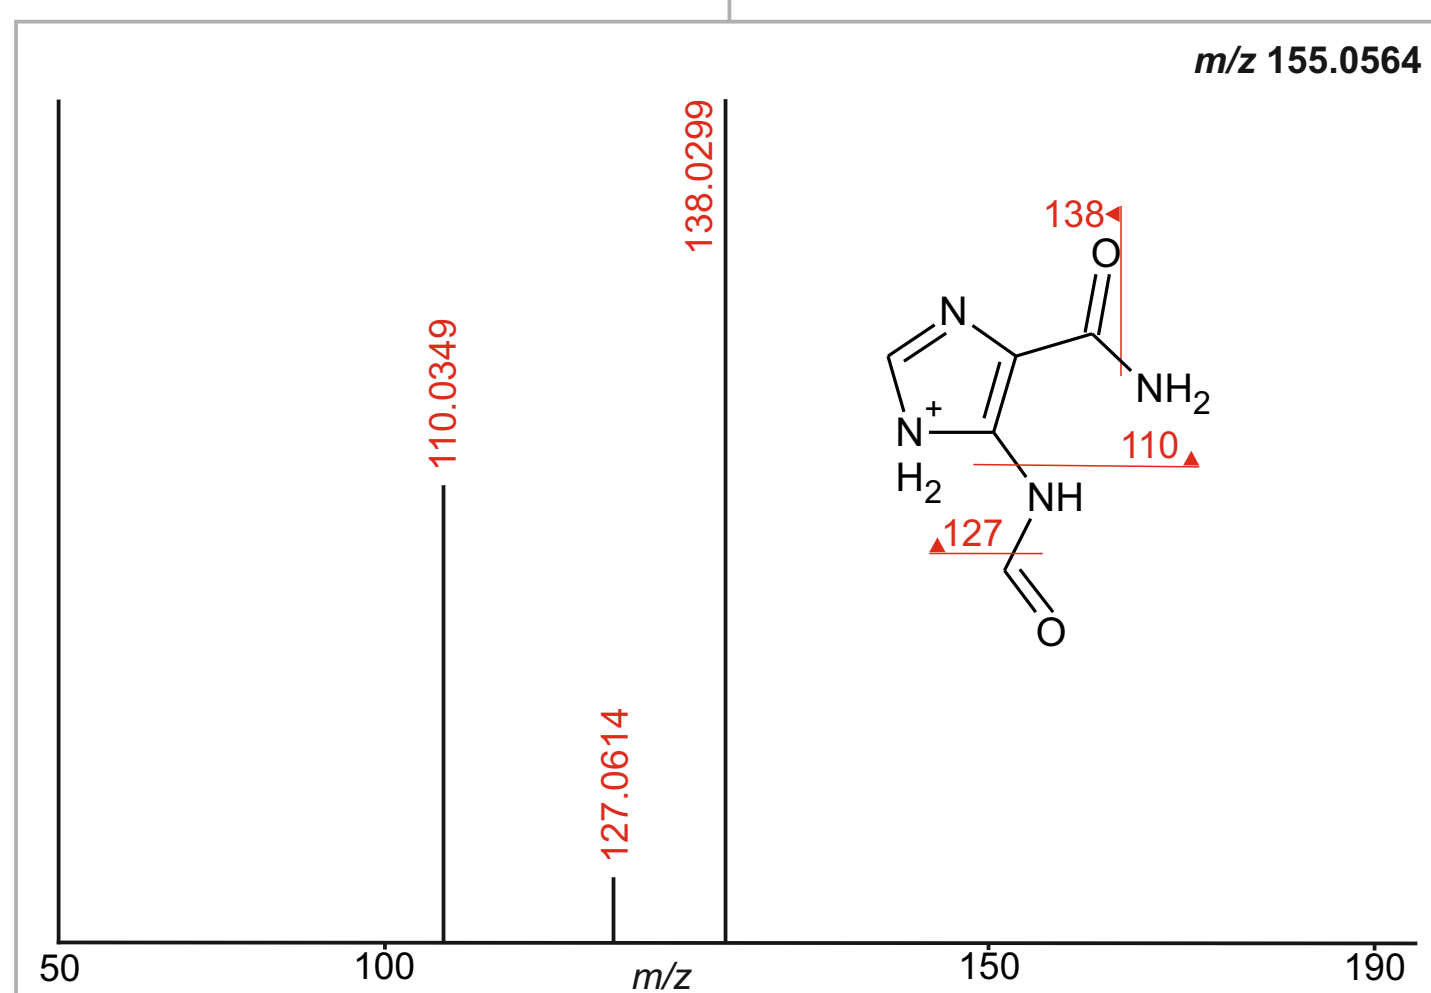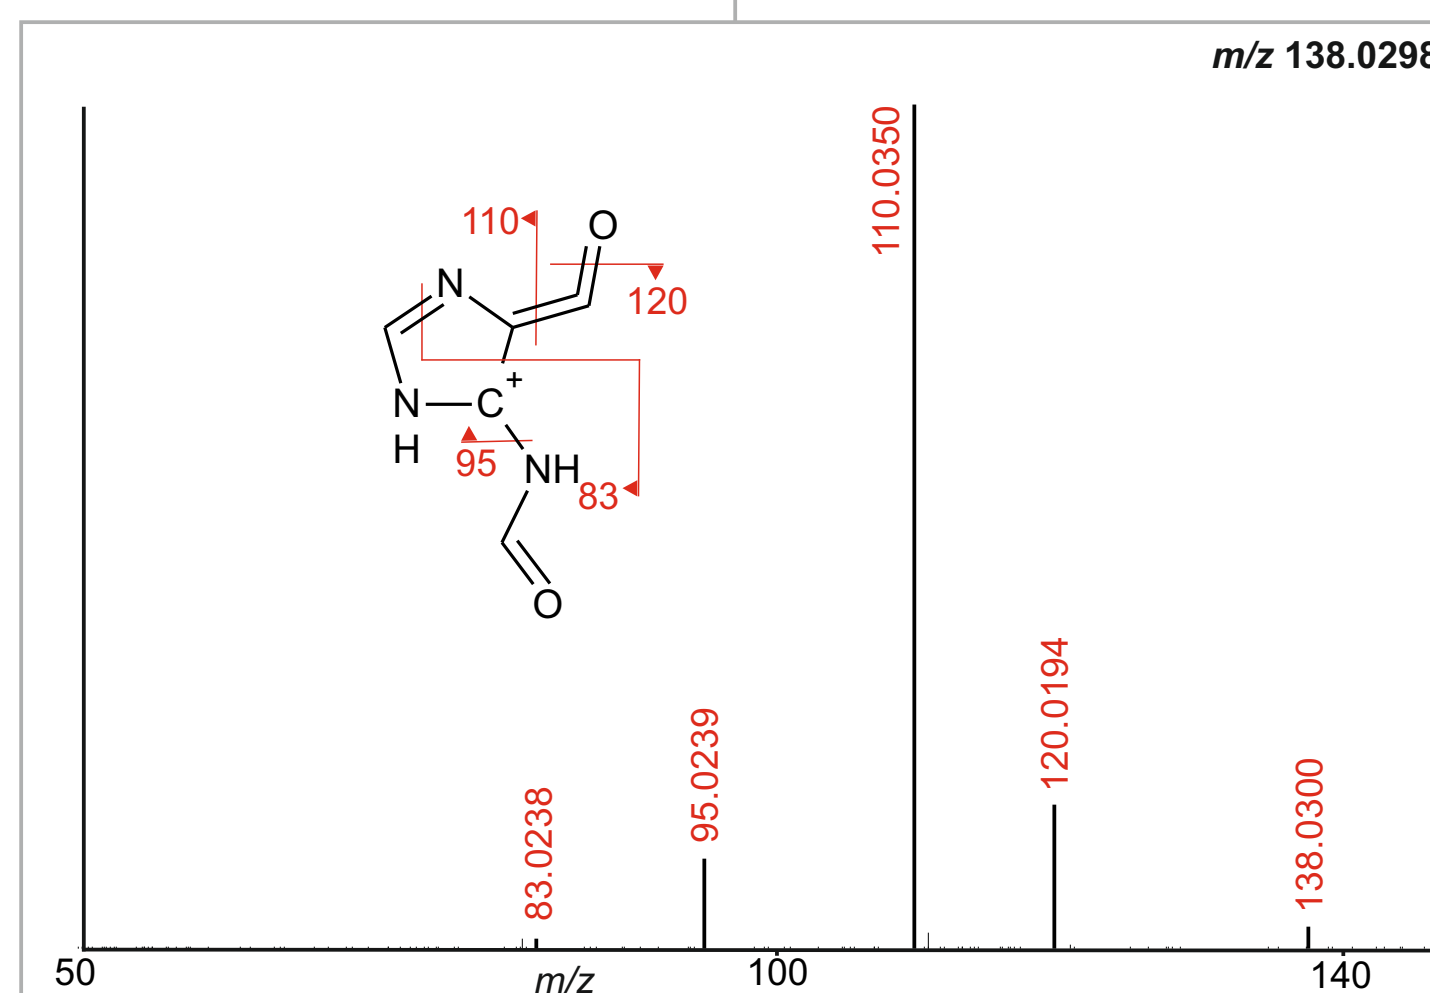

MS<sup>4</sup>

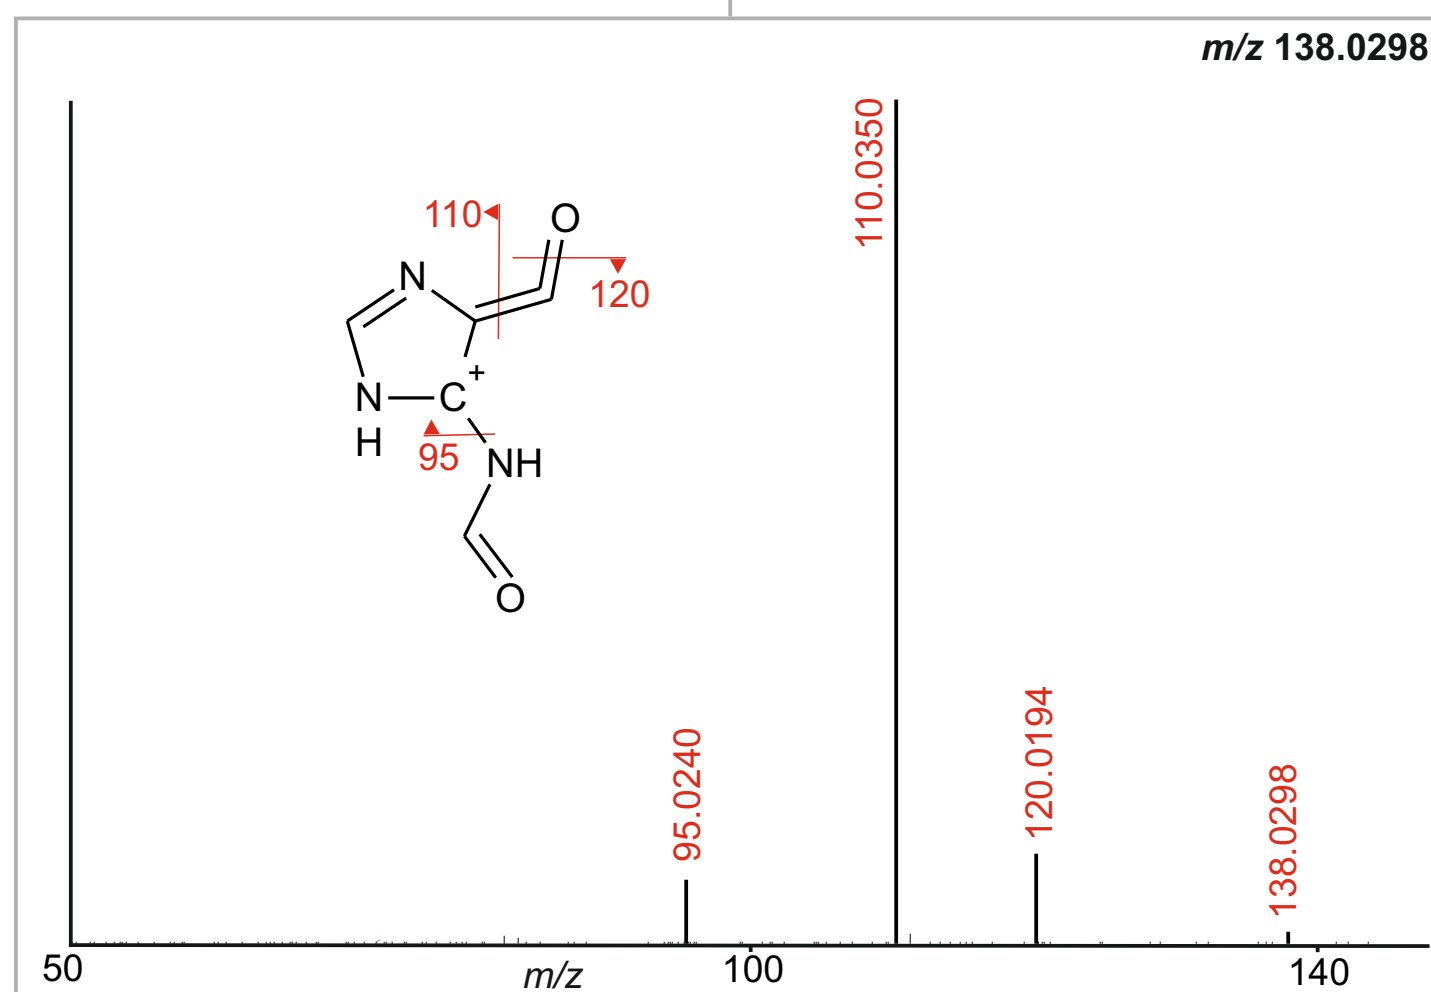

# FAICAR

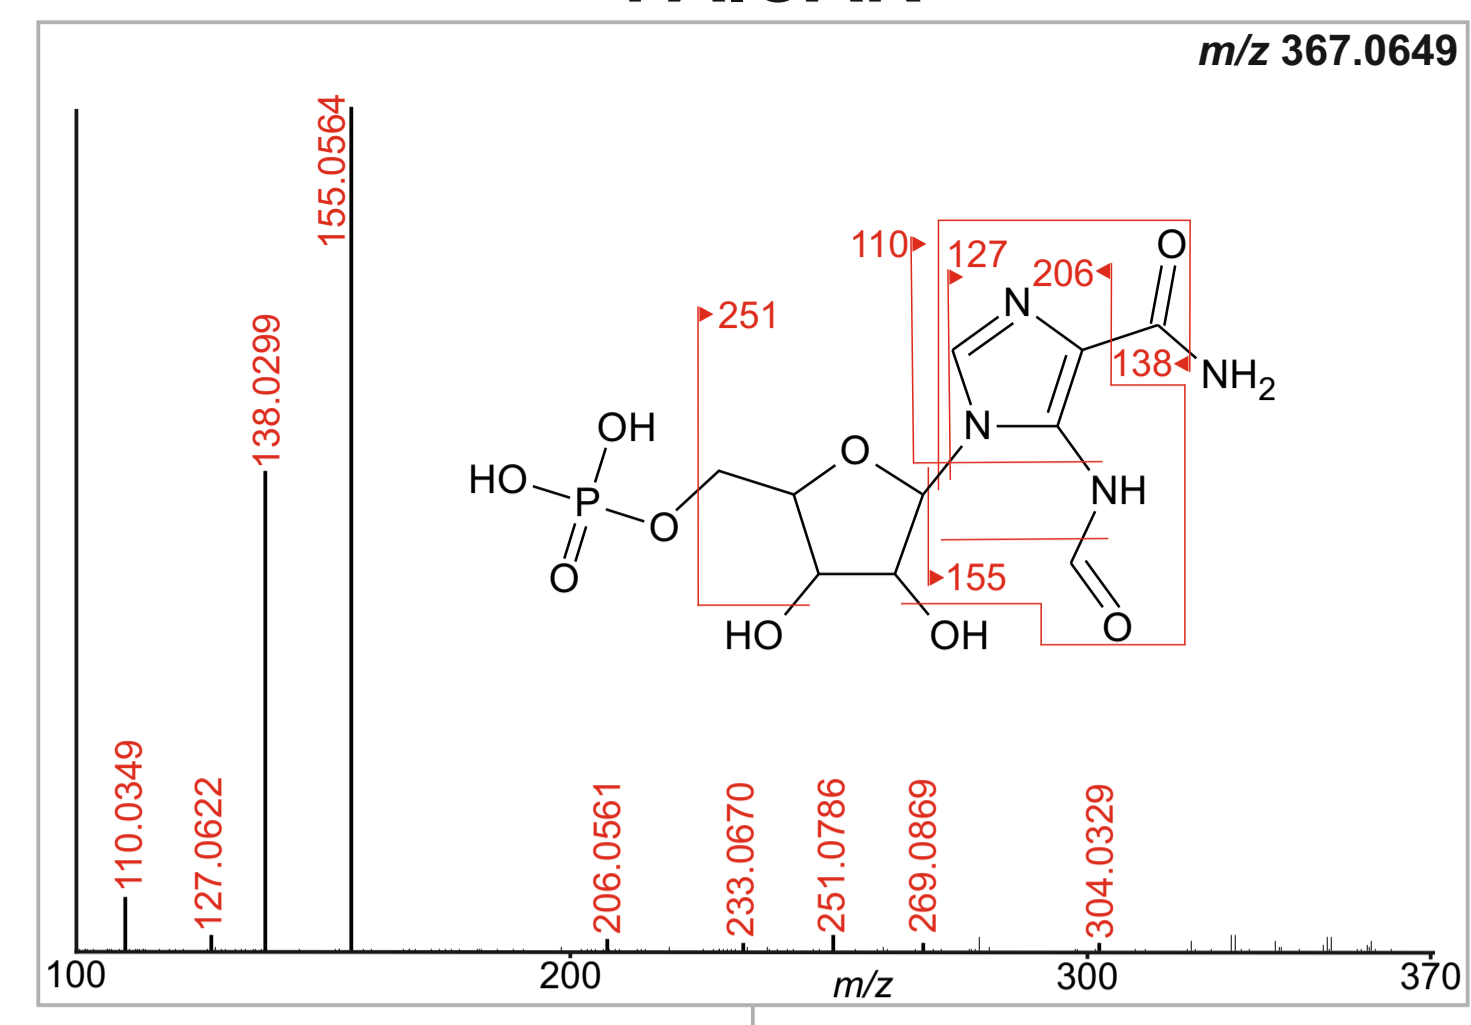

MS<sup>2</sup>

MS<sup>3</sup>

MS<sup>4</sup>

MS<sup>5</sup>

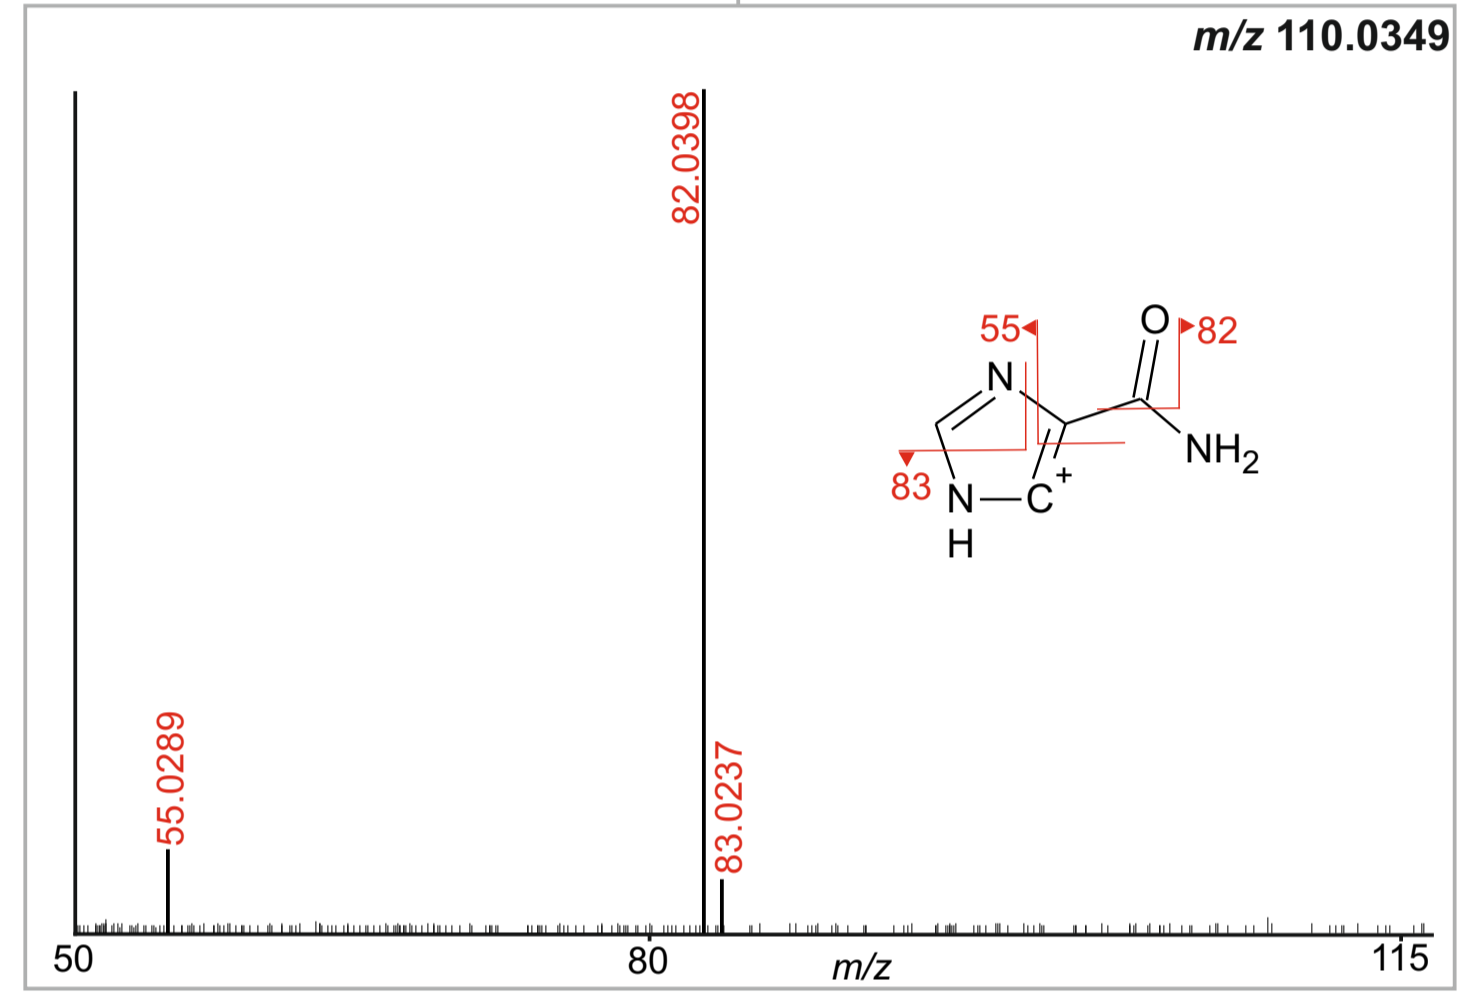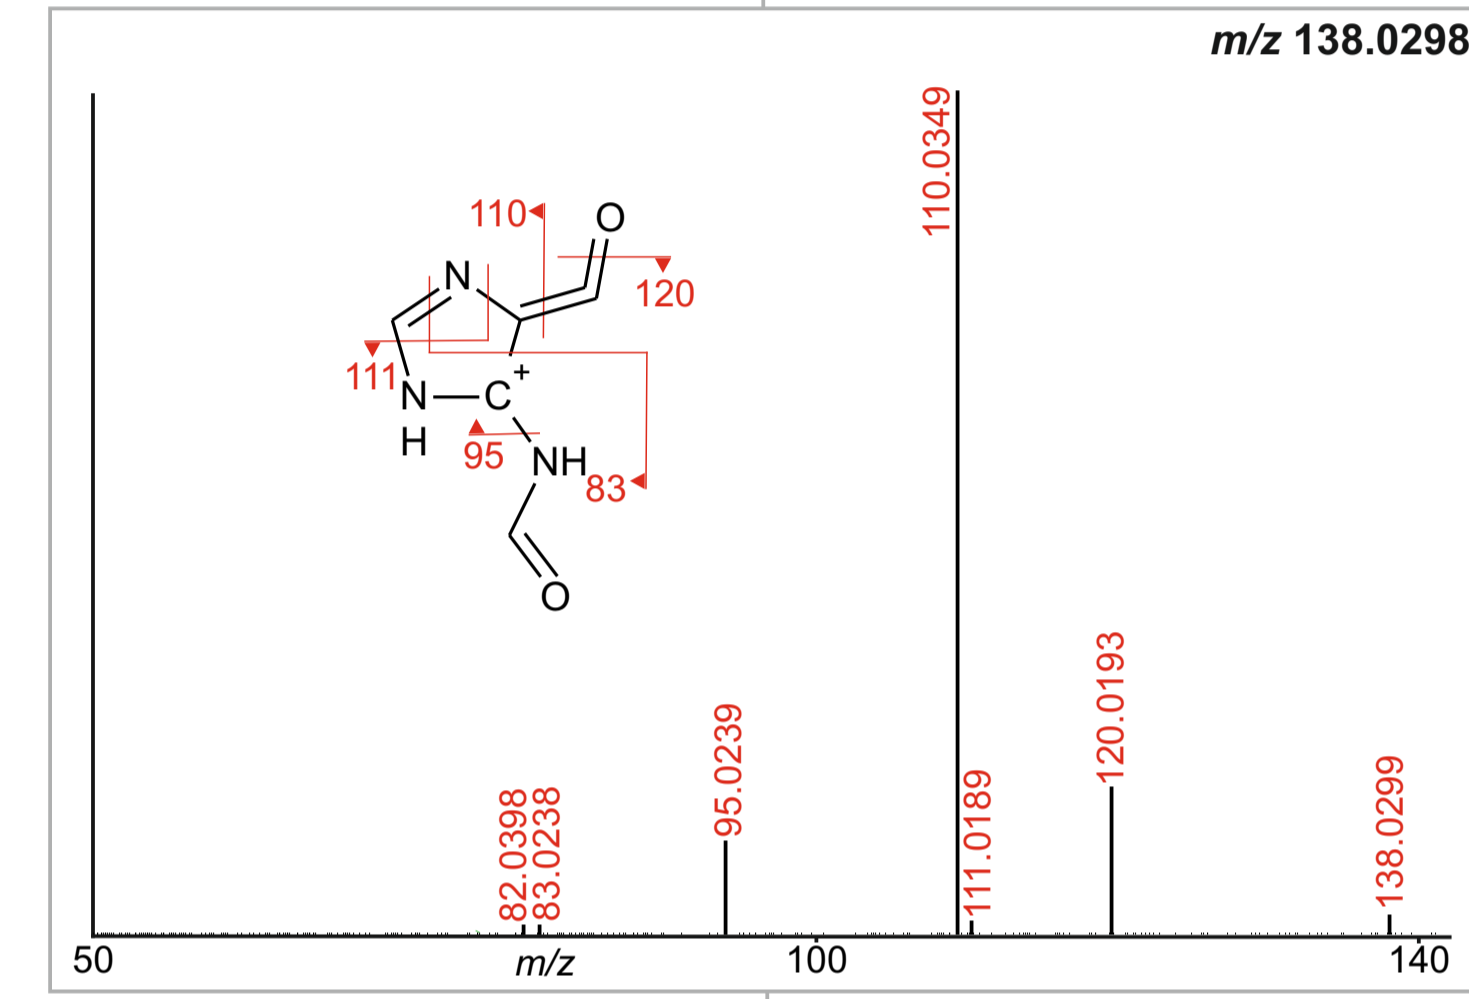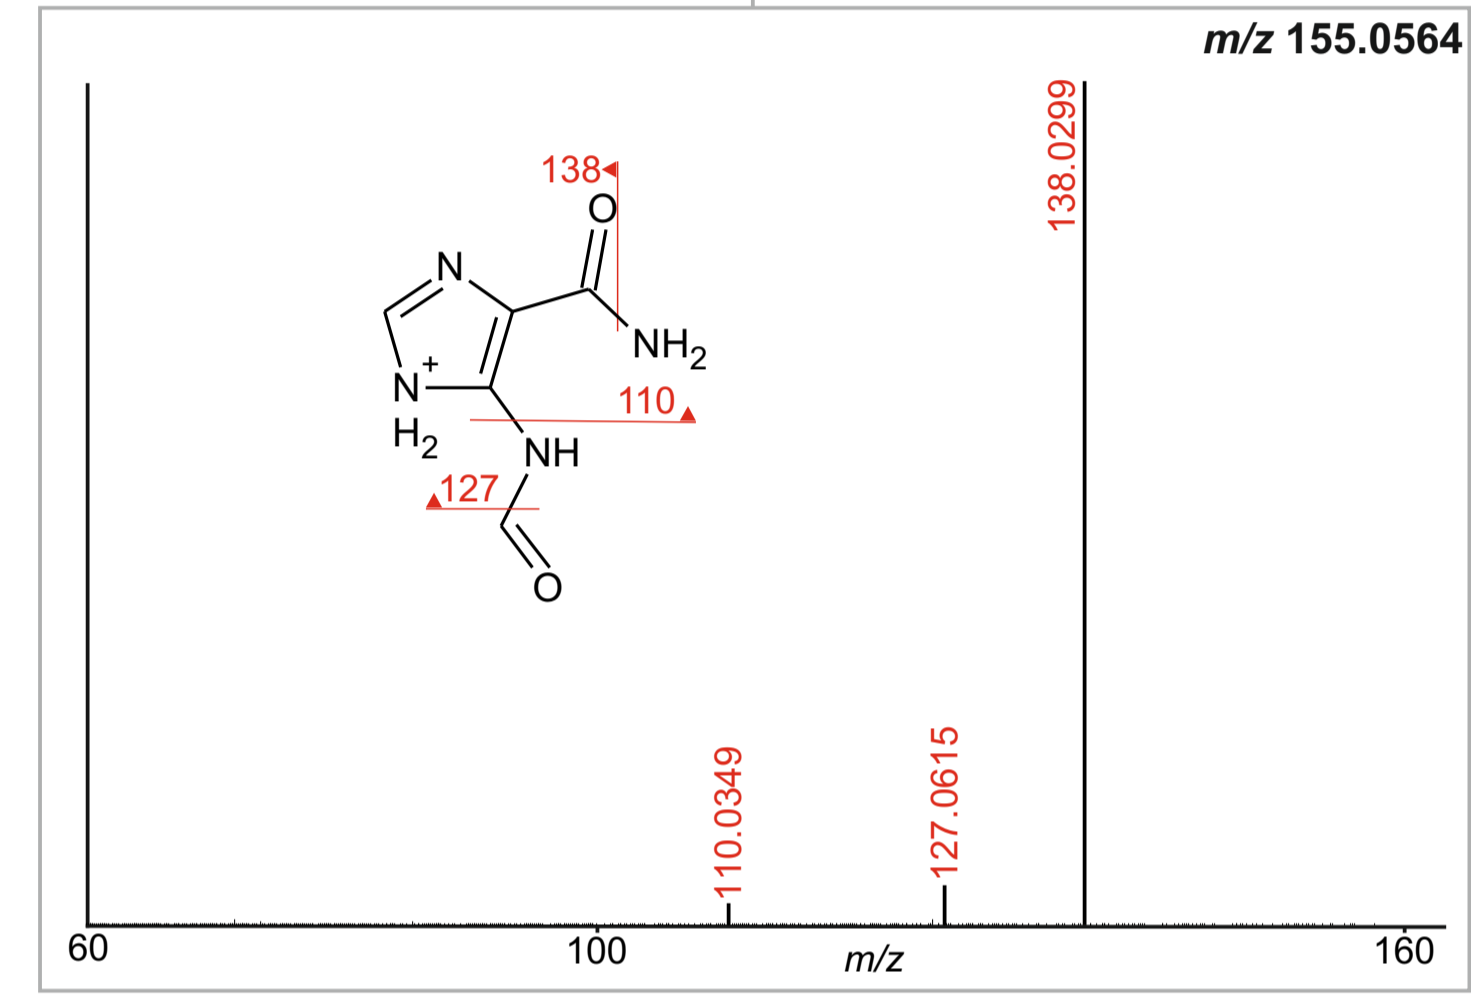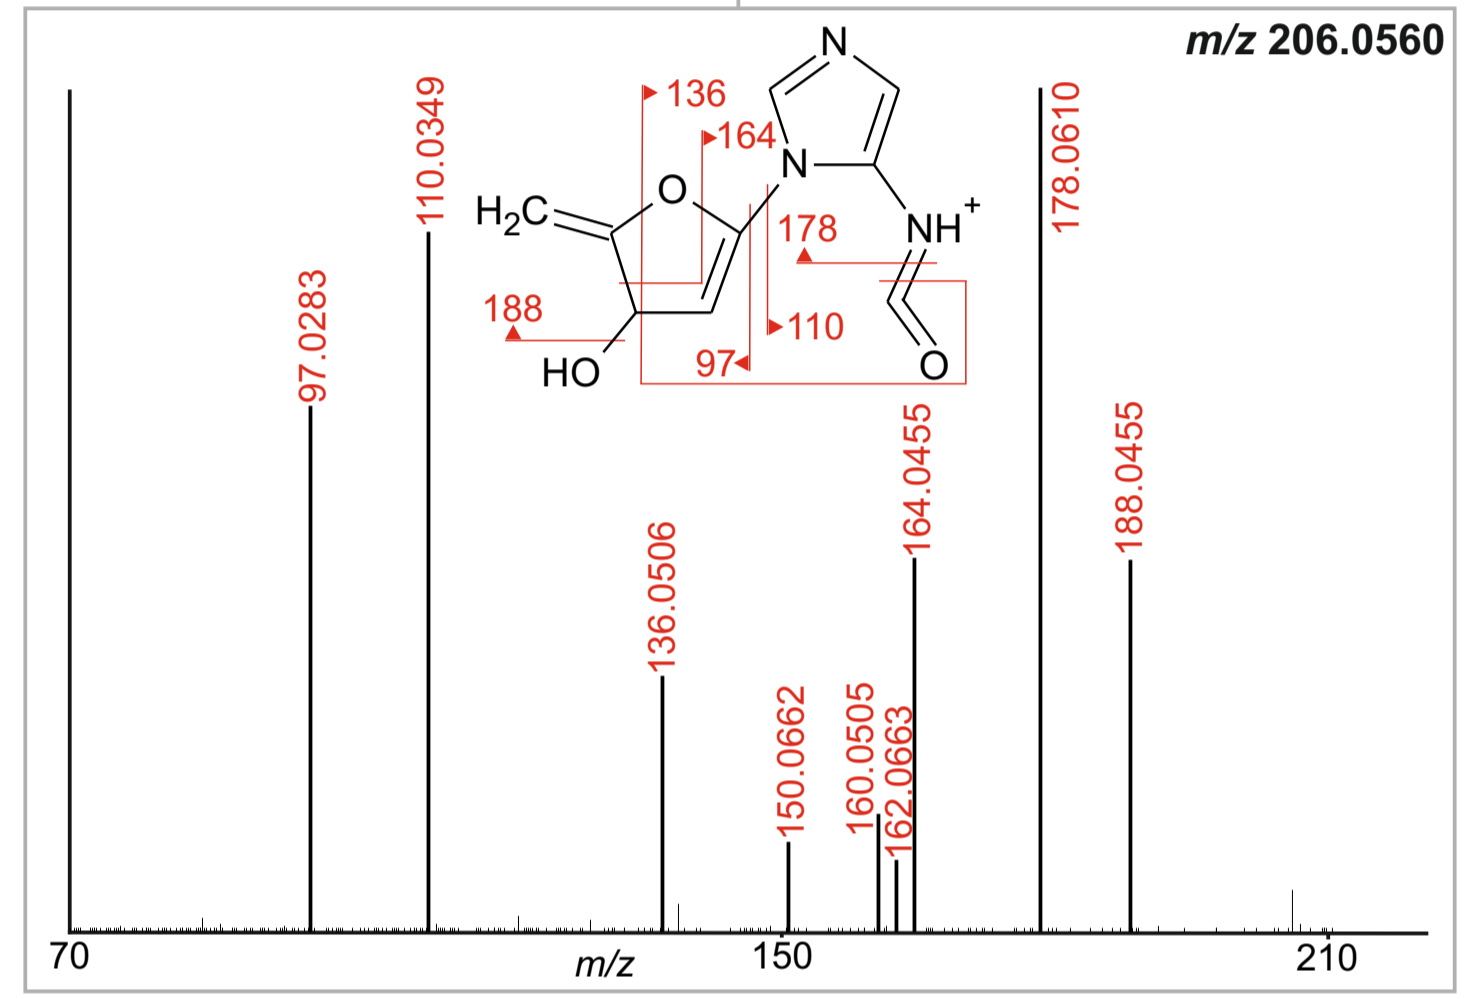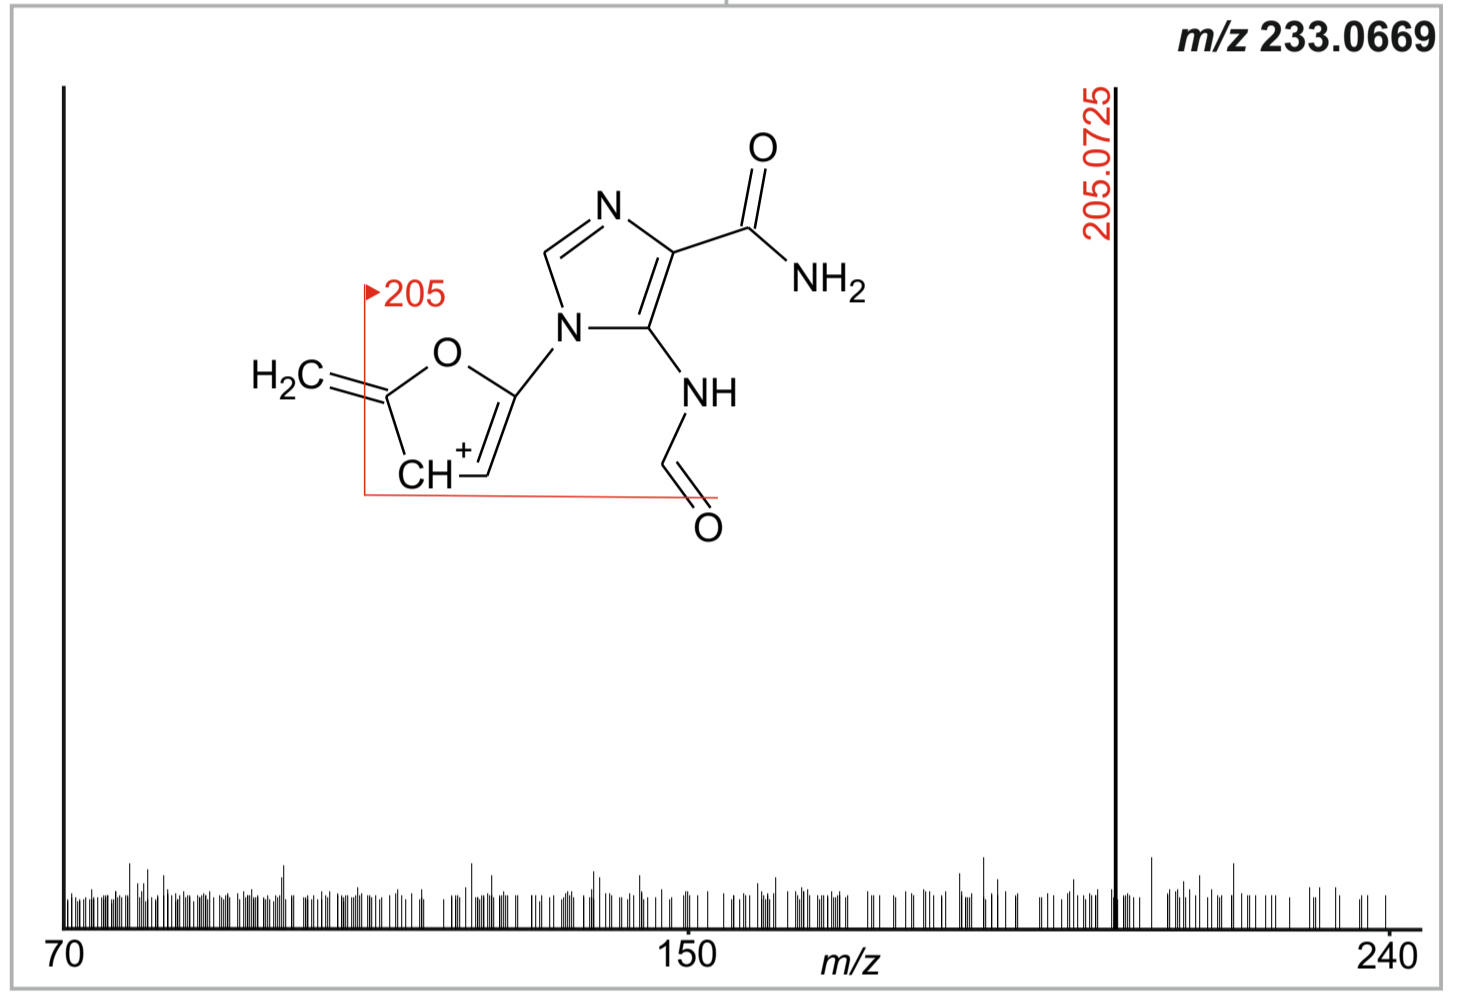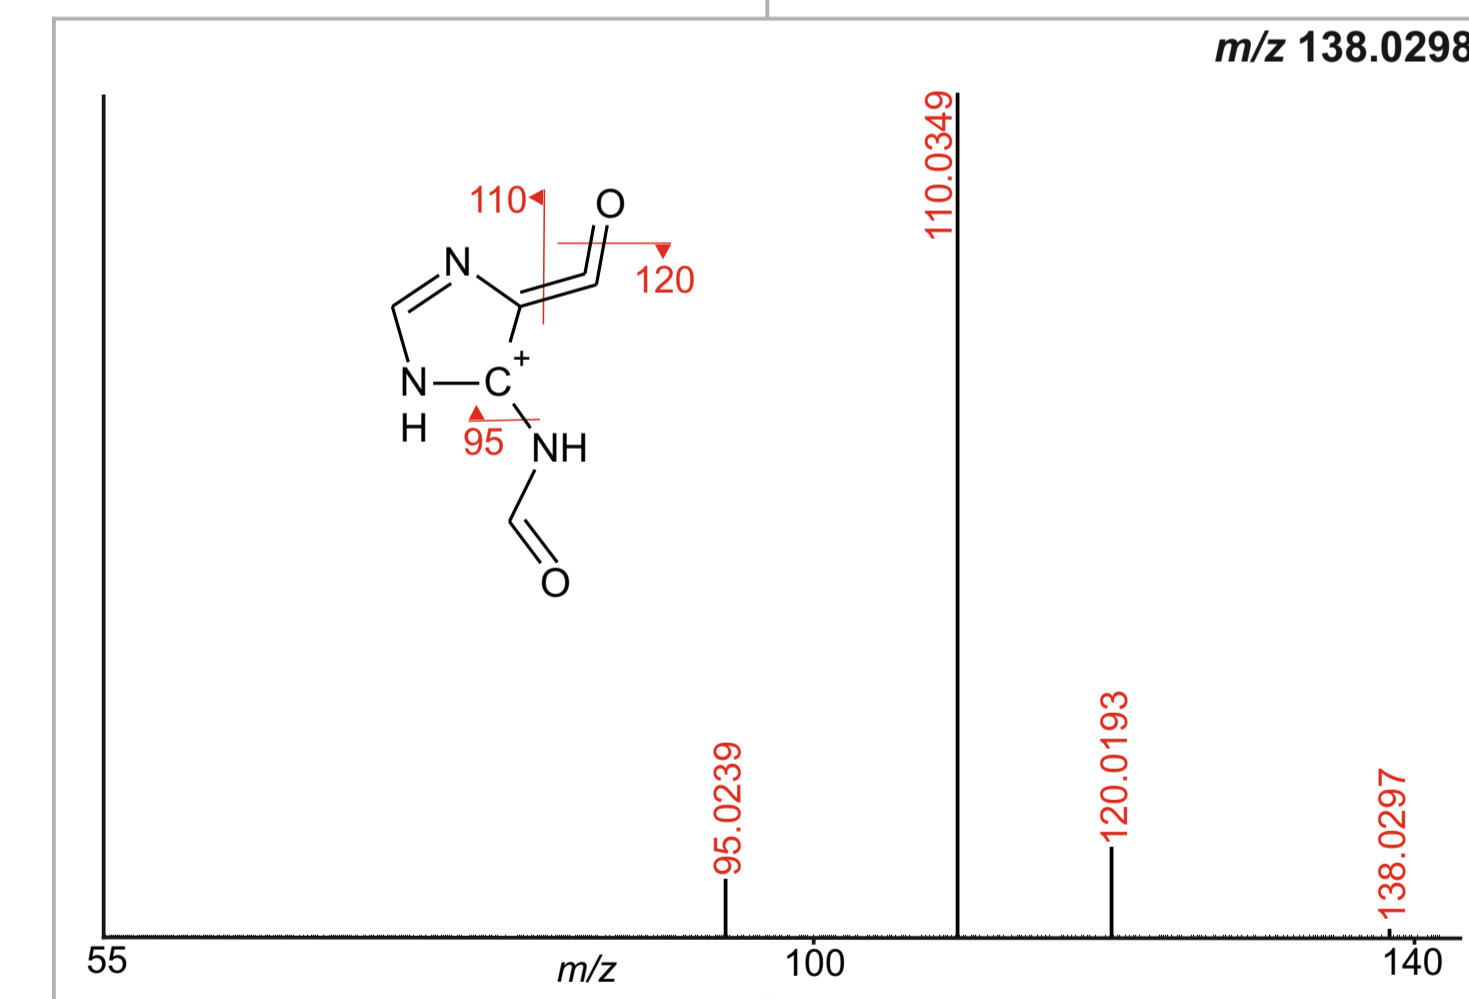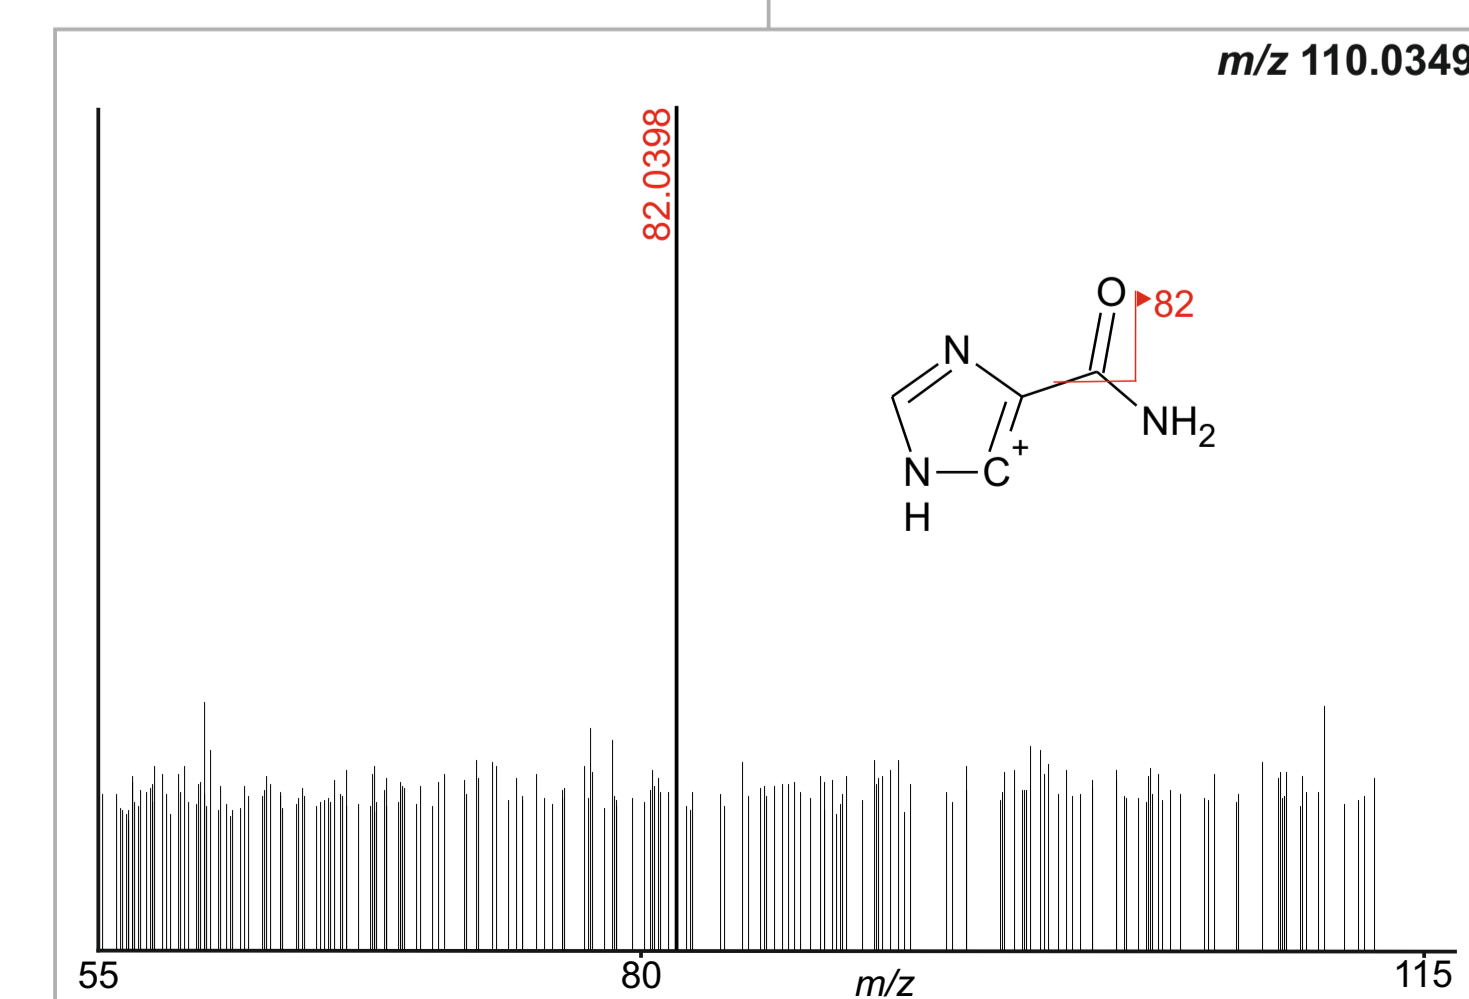



# IMP

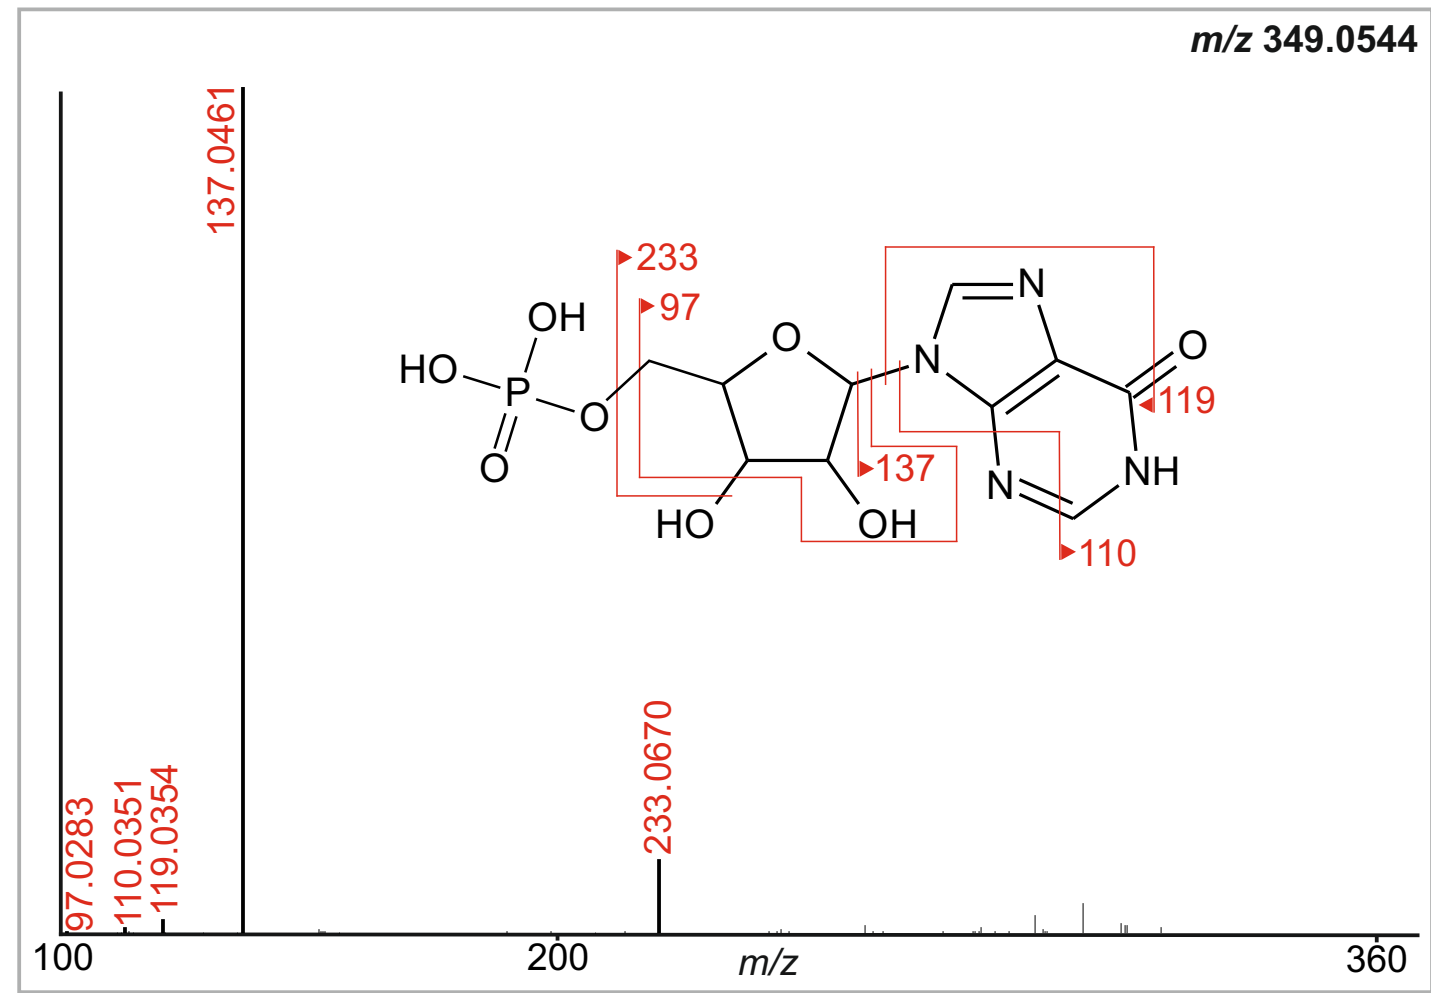

MS<sup>2</sup>

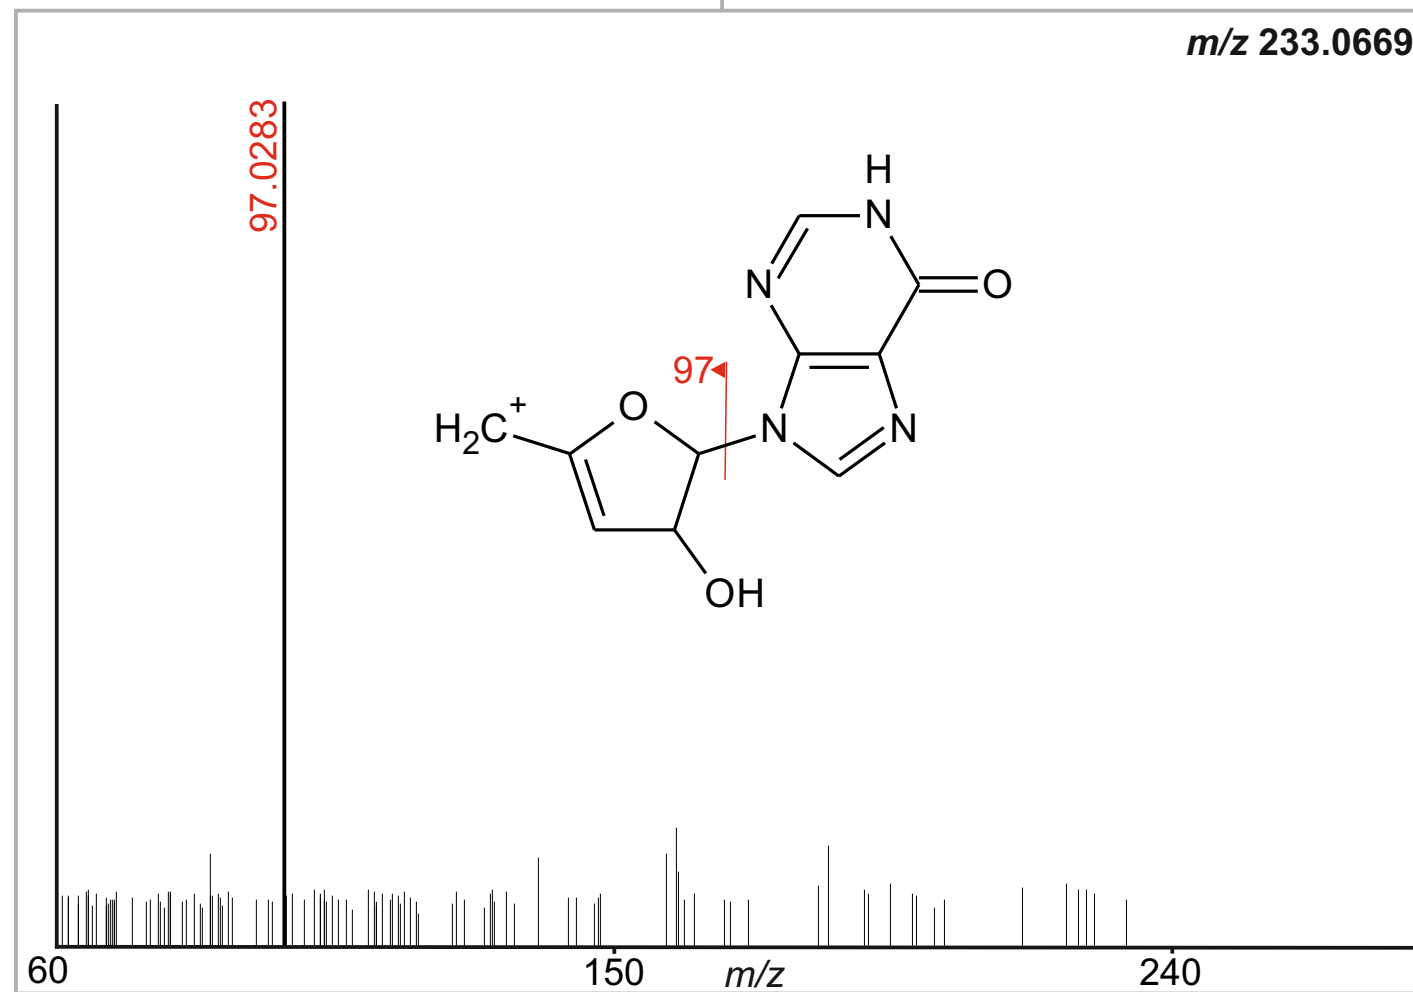

MS<sup>3</sup>

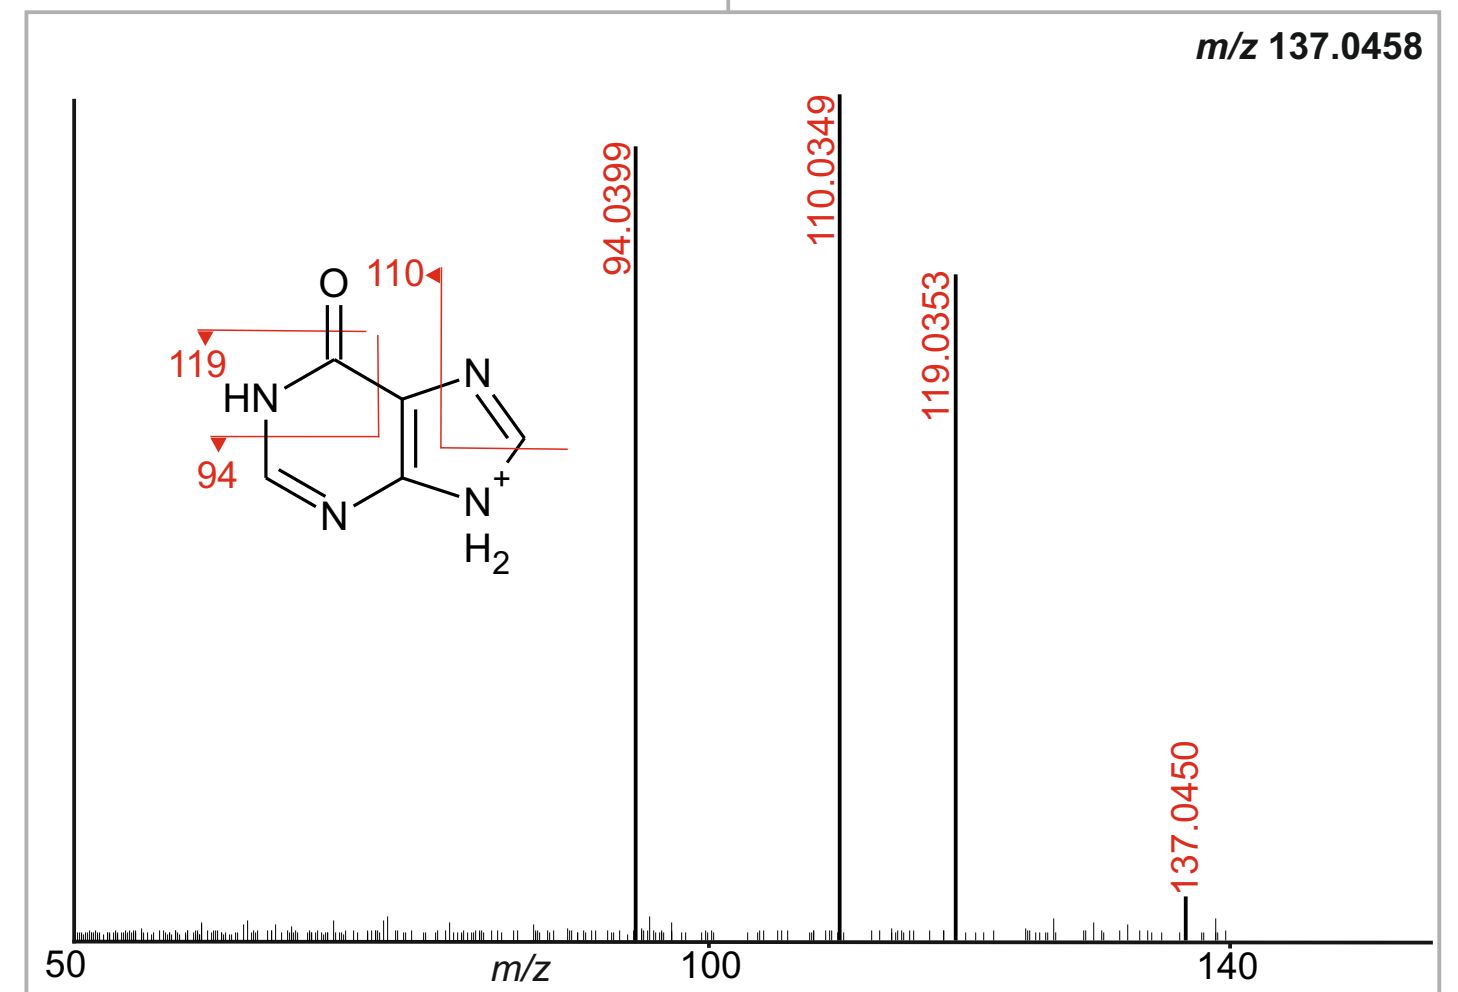

# SAdo

MS<sup>2</sup>

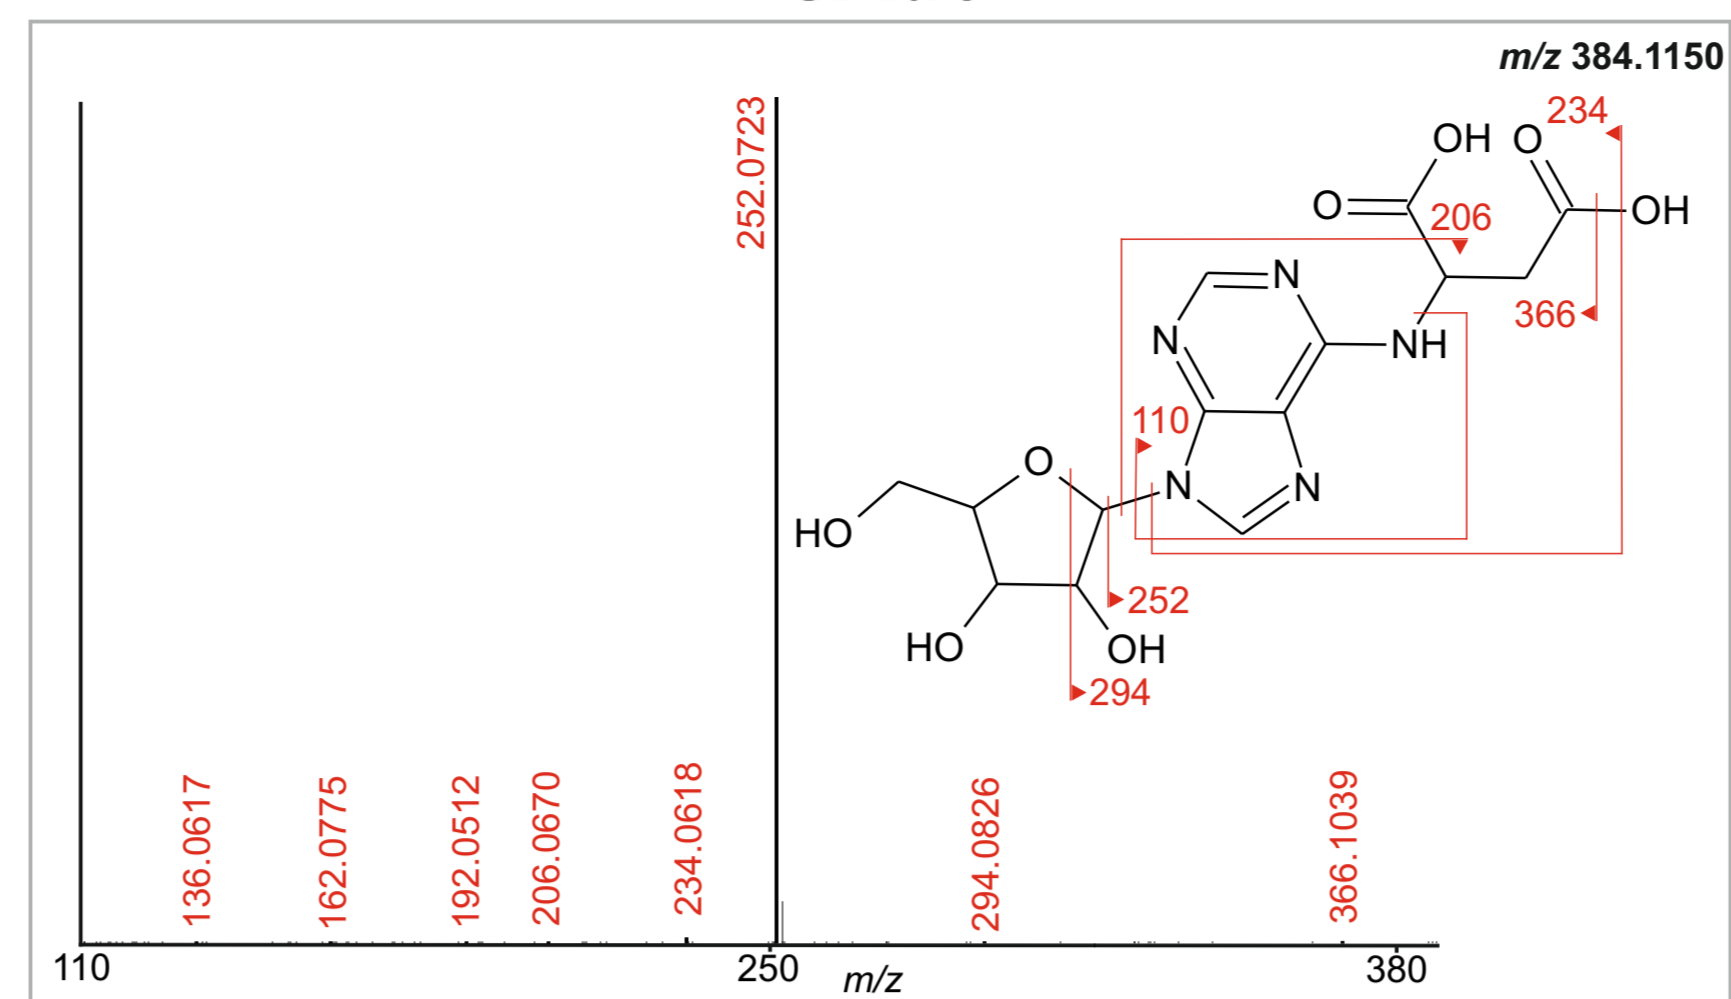

MS<sup>3</sup>

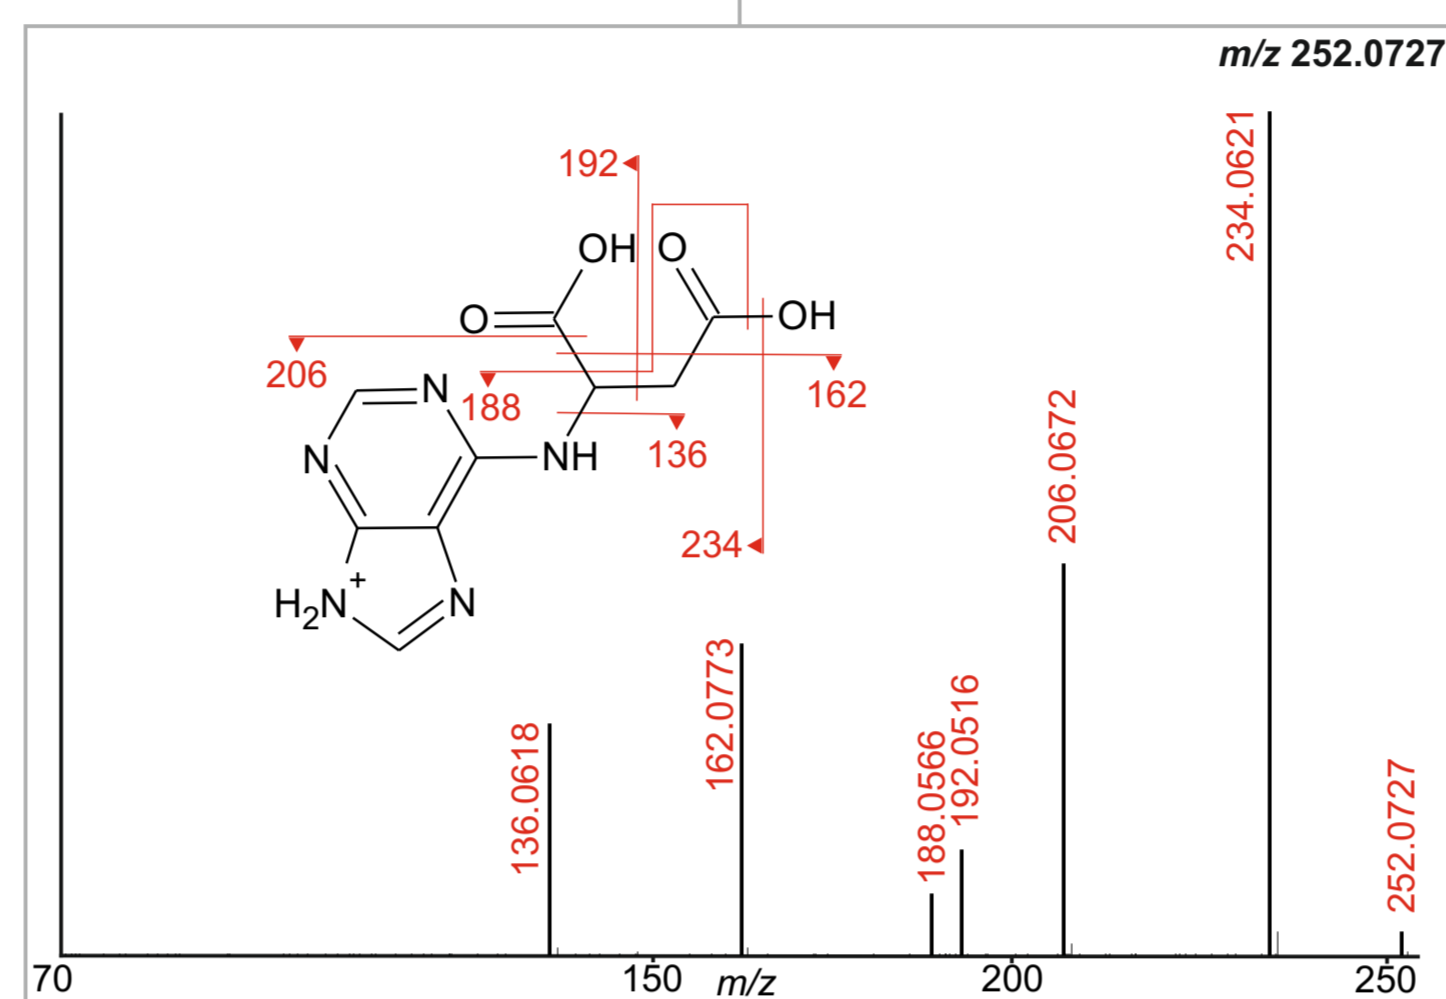

MS<sup>4</sup>

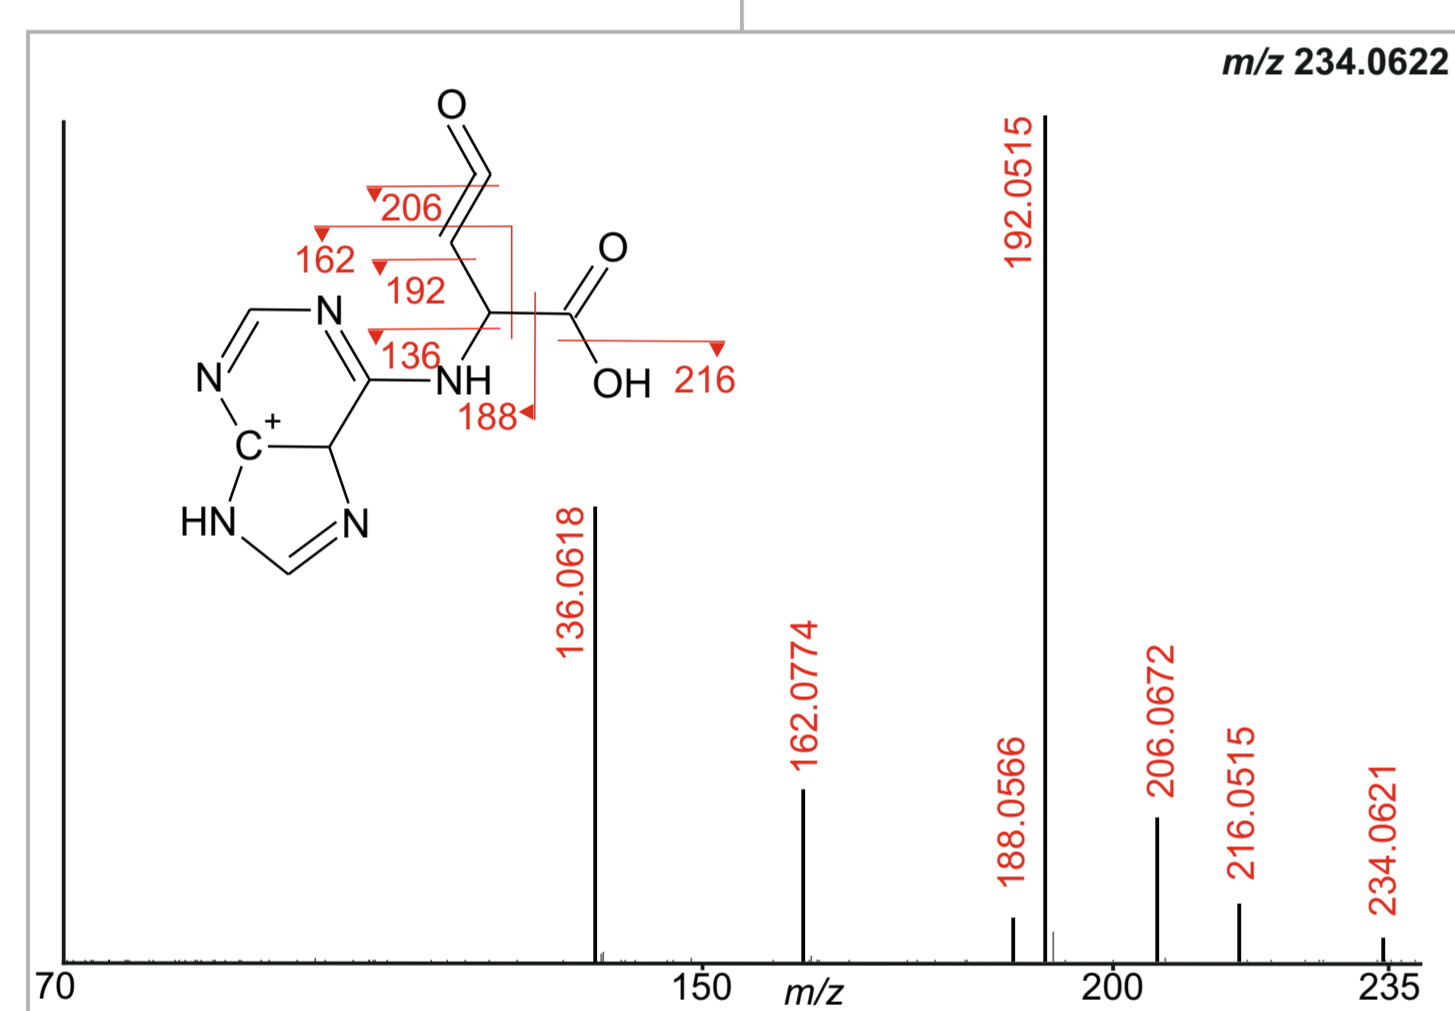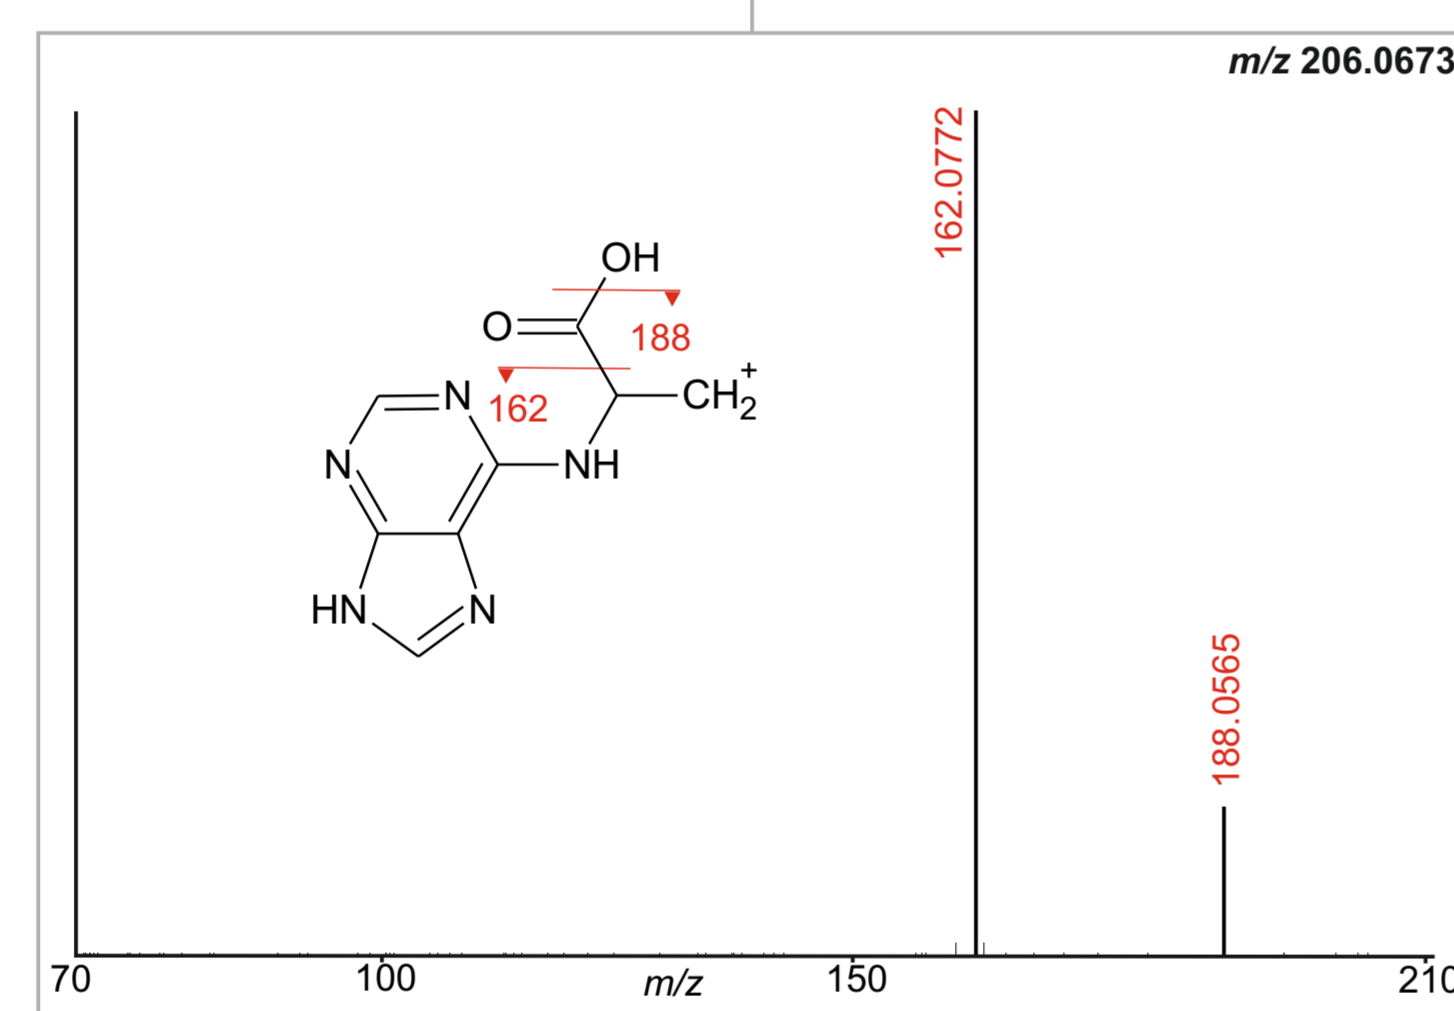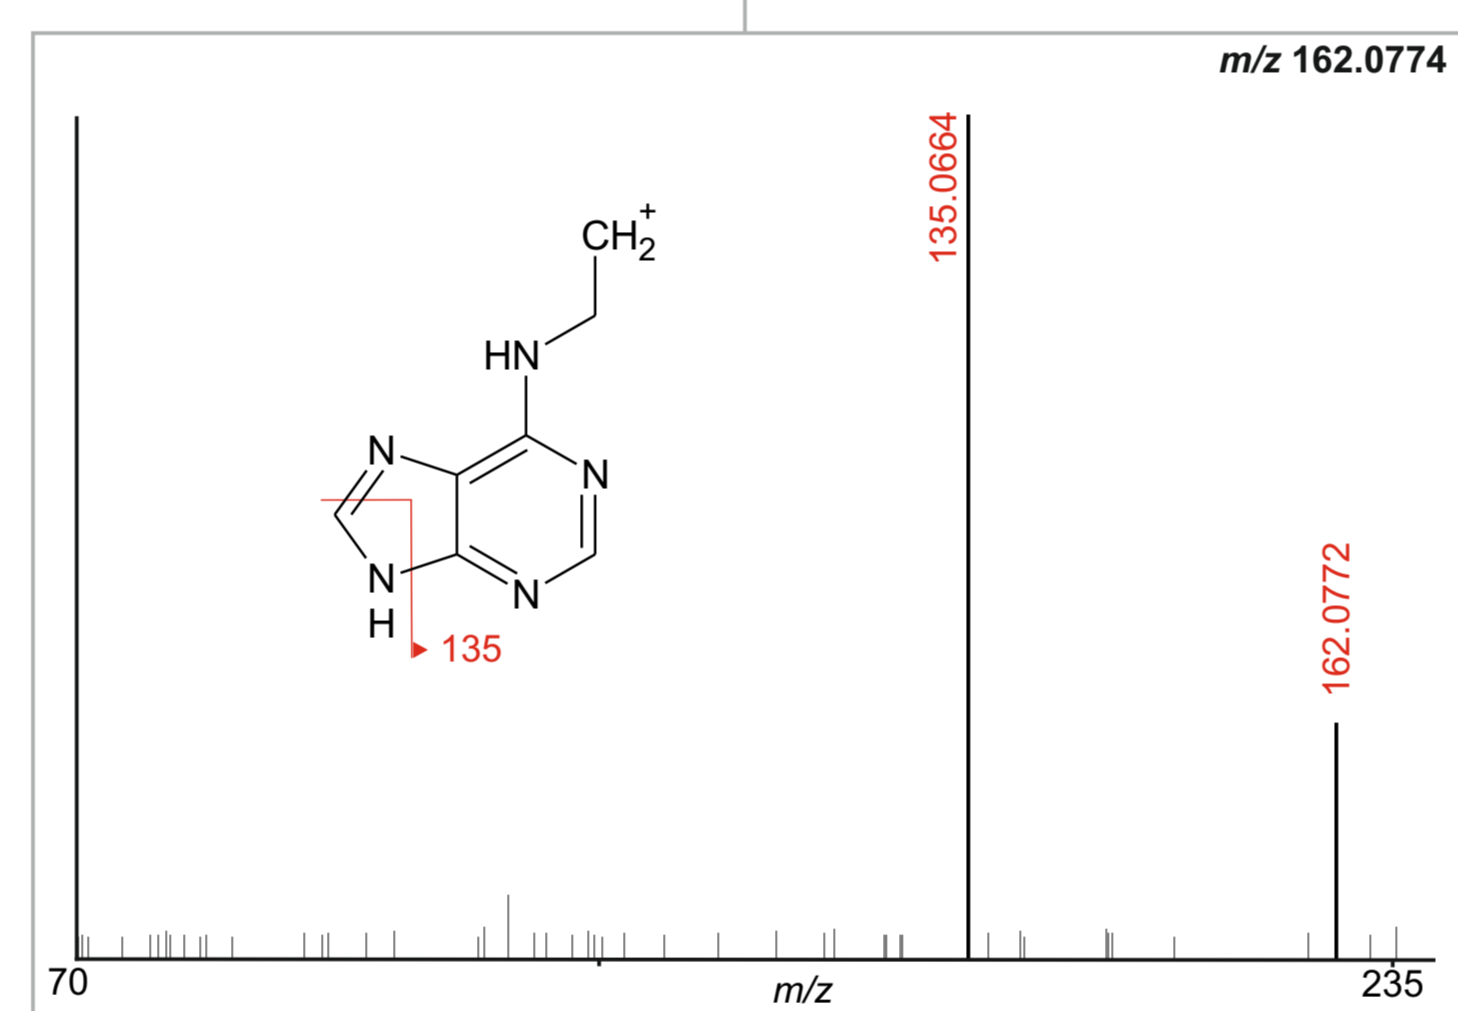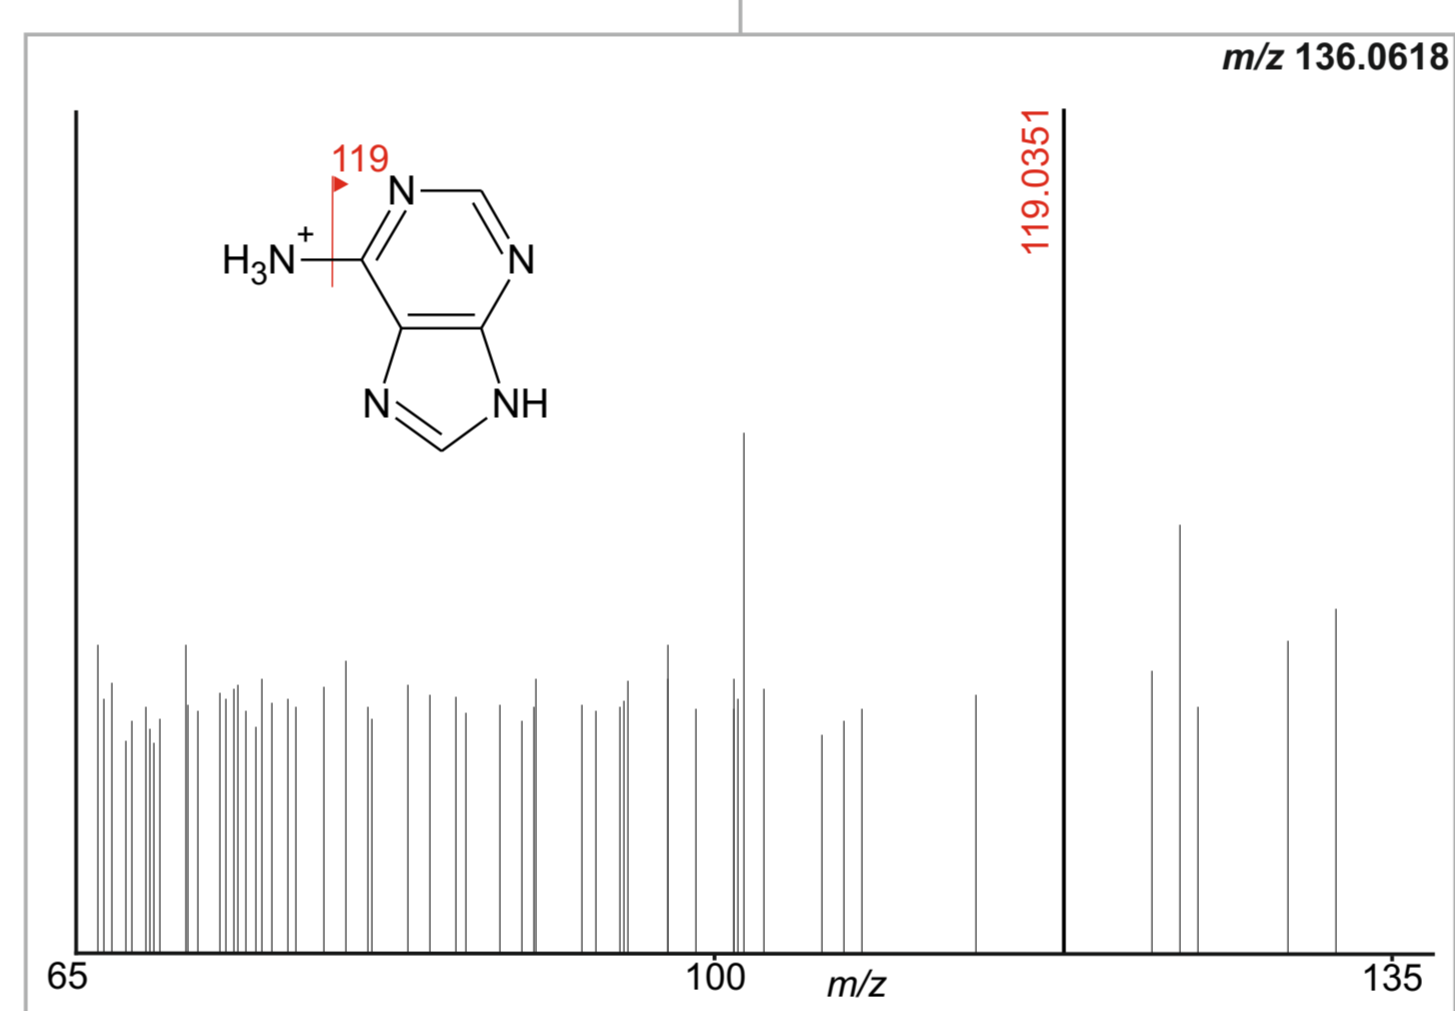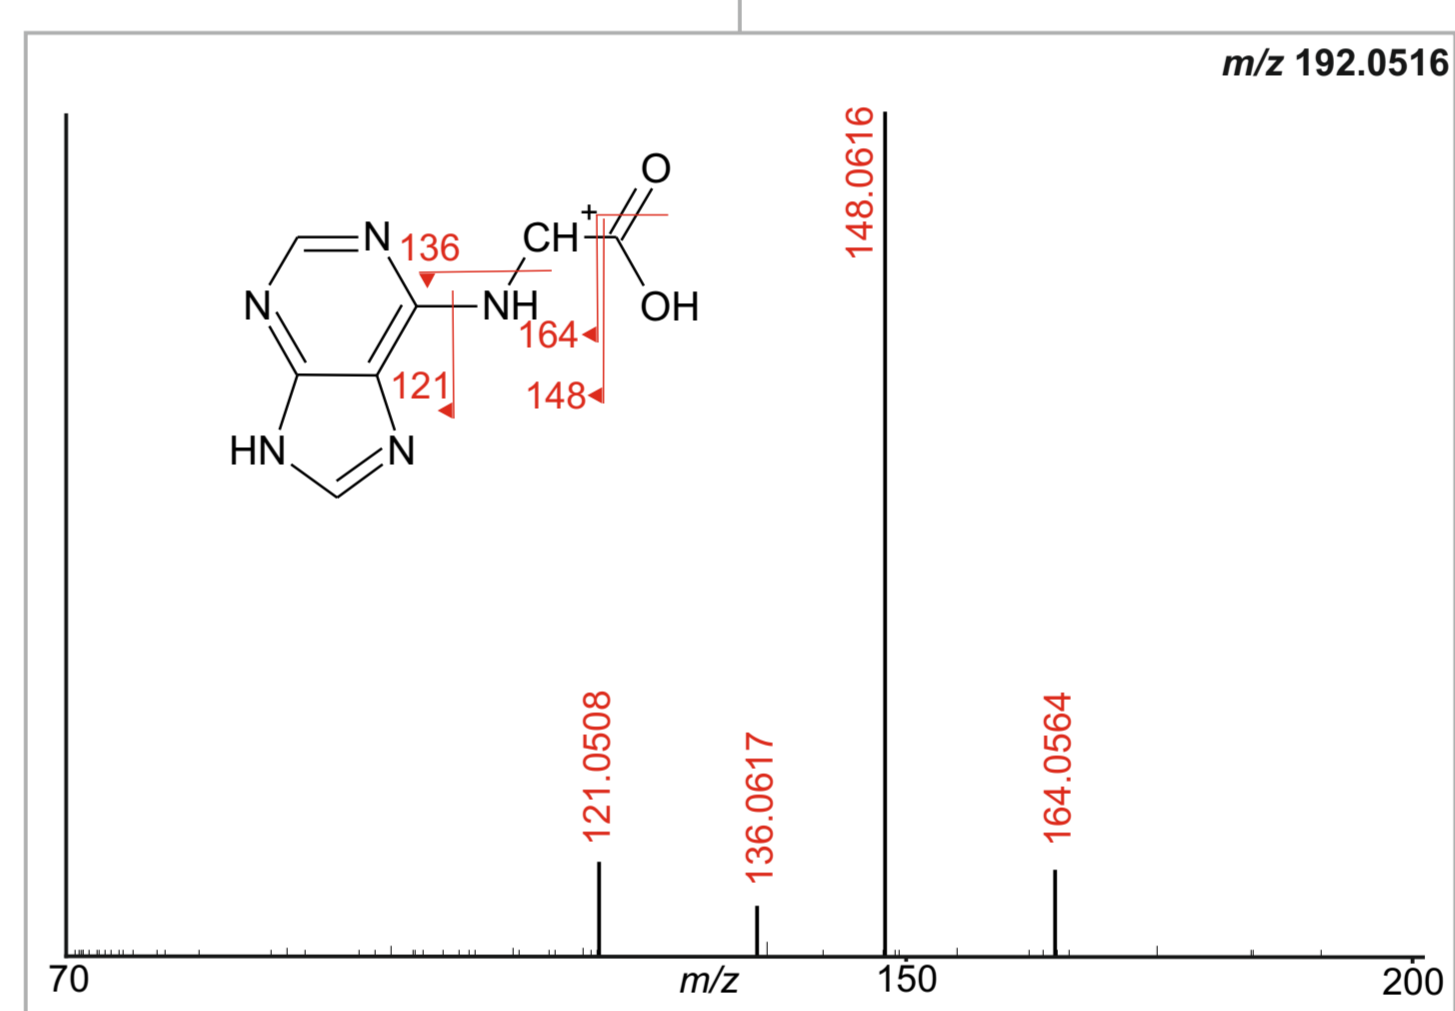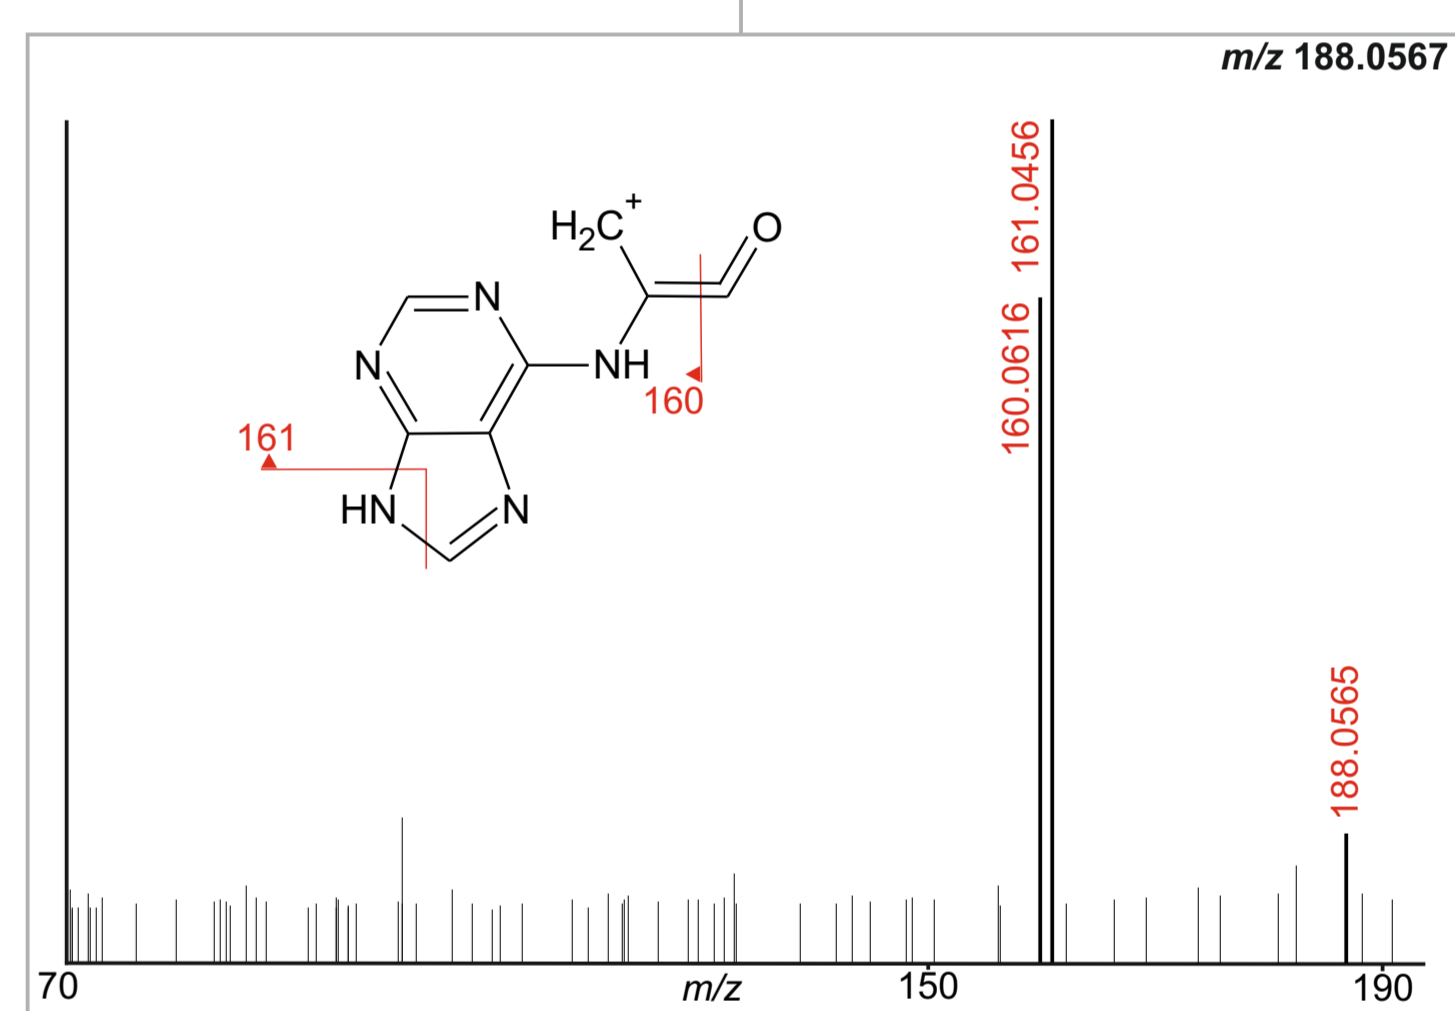

MS<sup>5</sup>

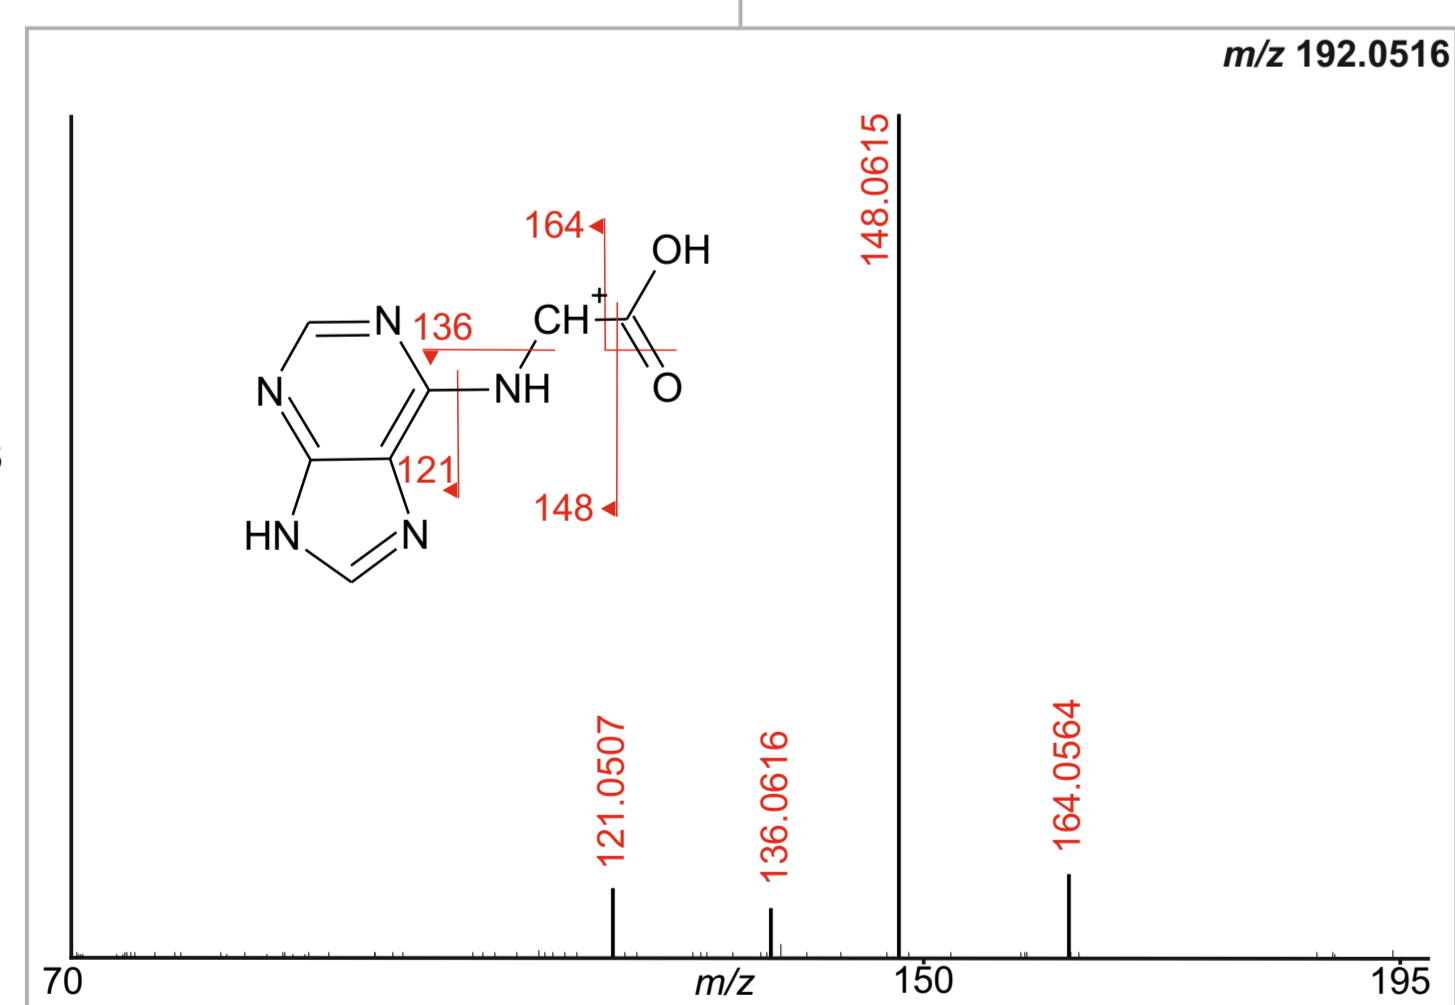

MS<sup>6</sup>

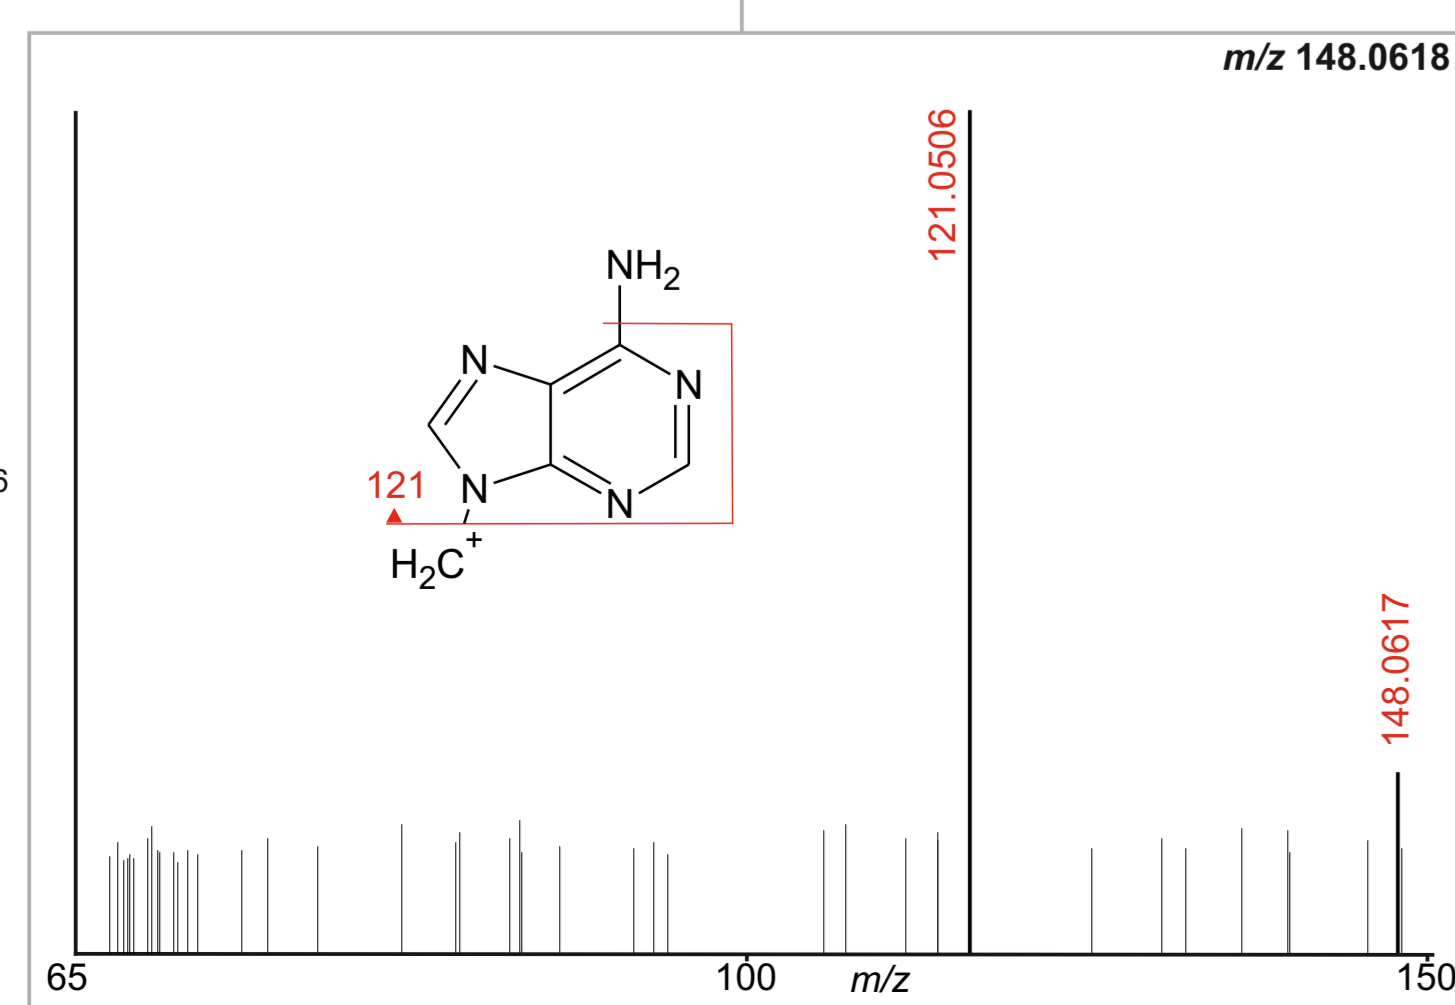

# SAMP

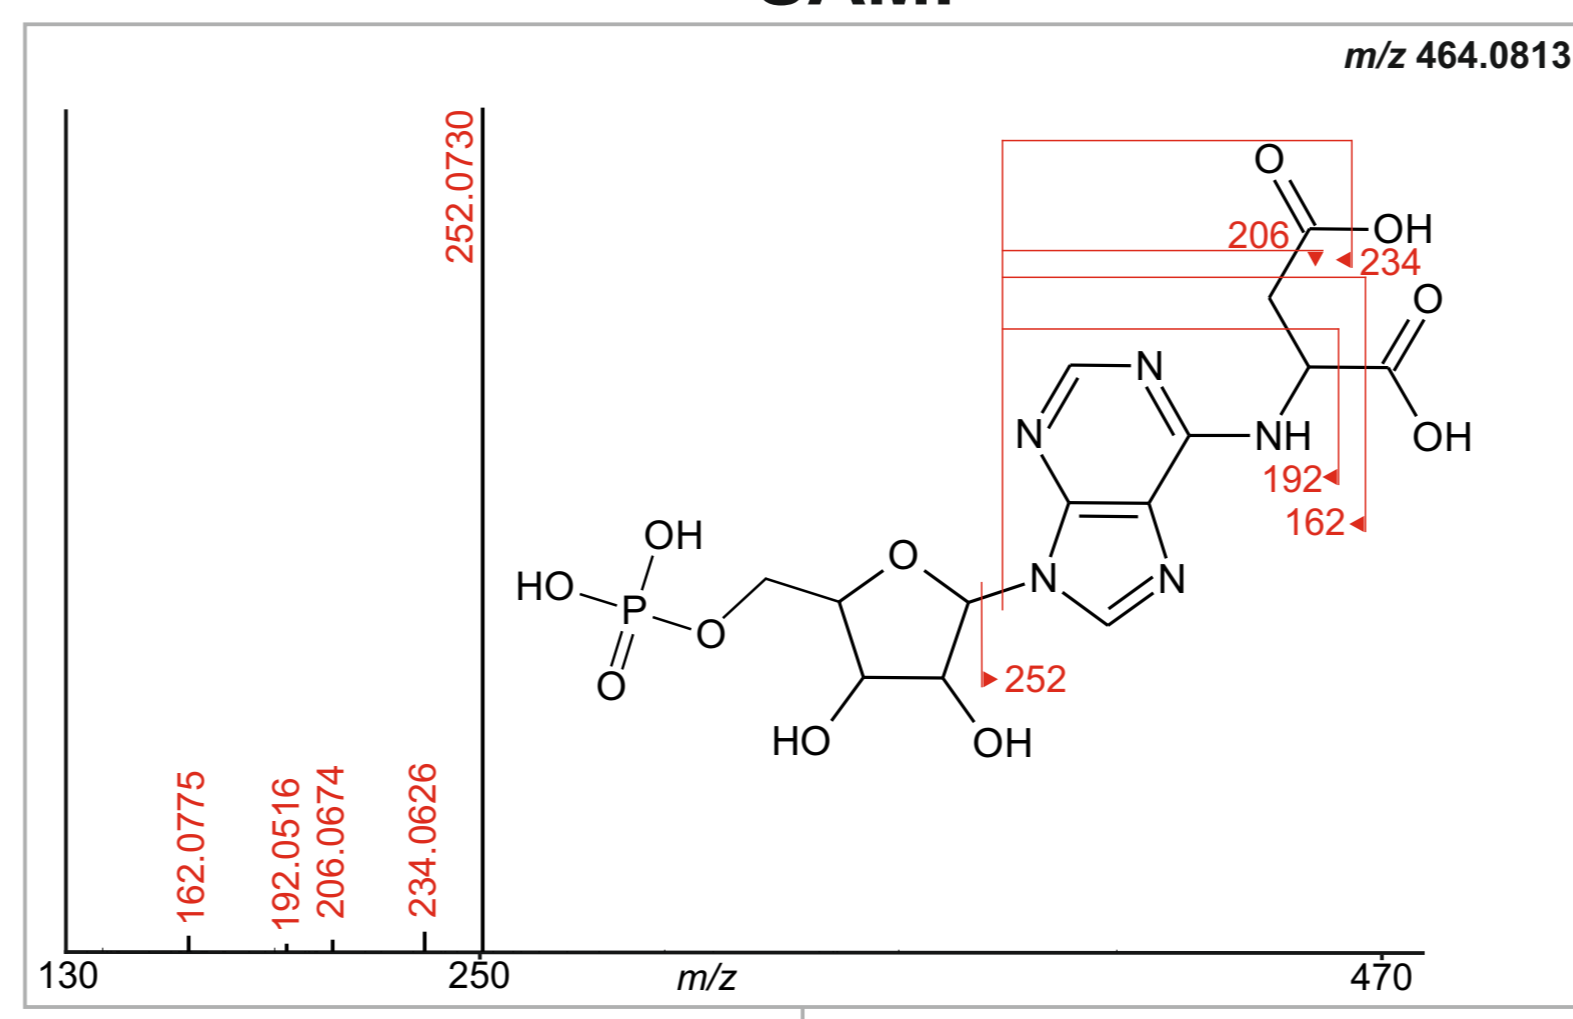

MS<sup>2</sup>

MS<sup>3</sup>

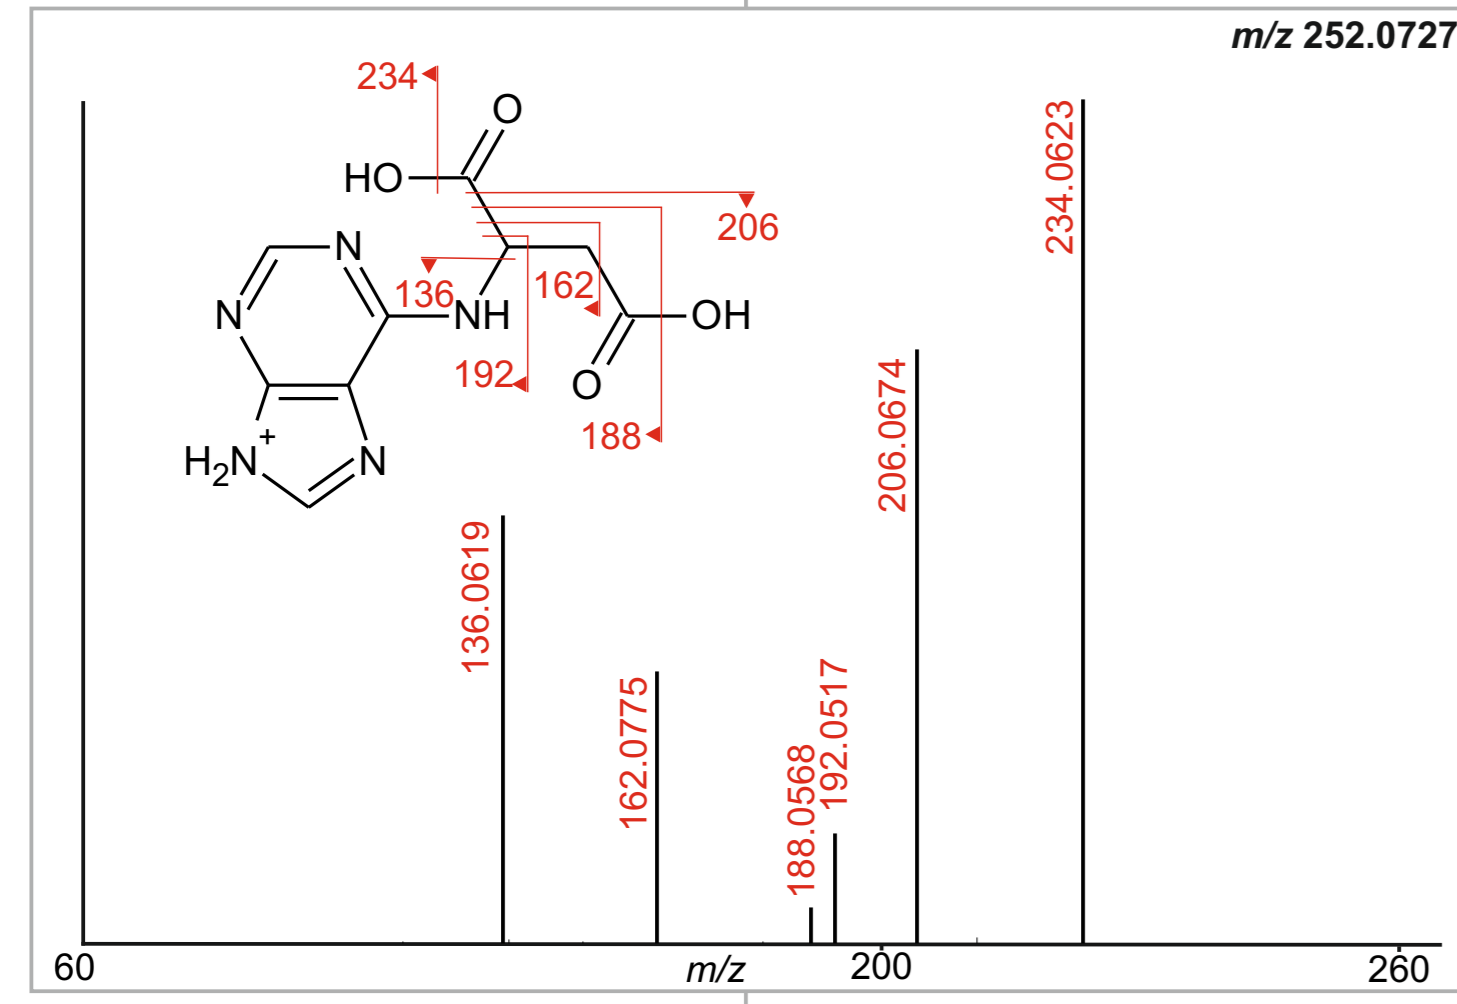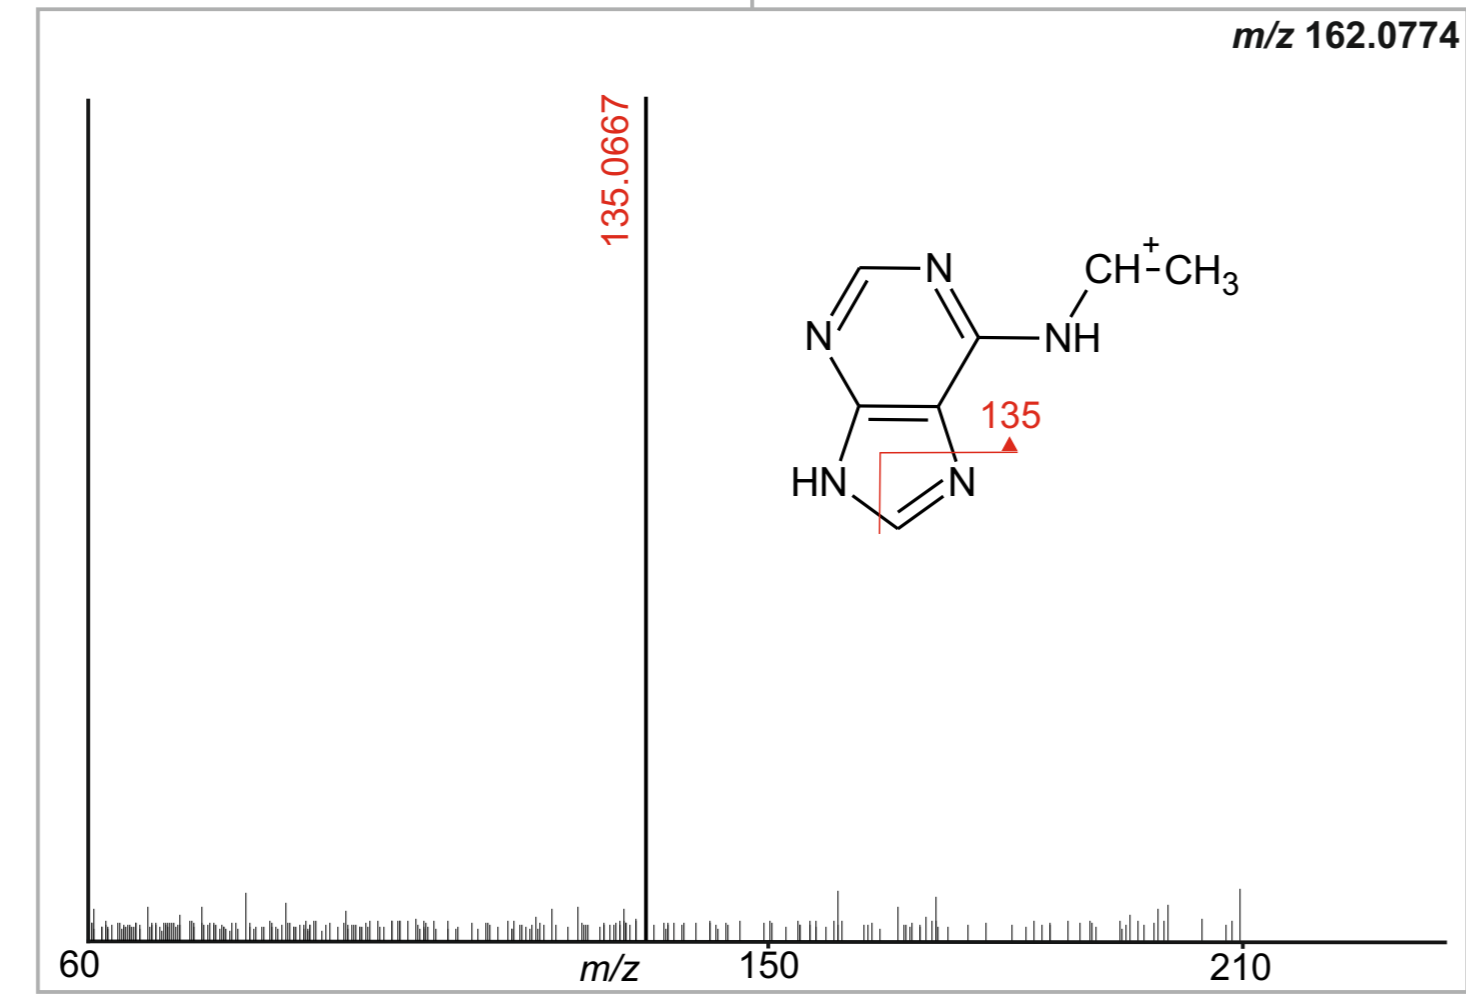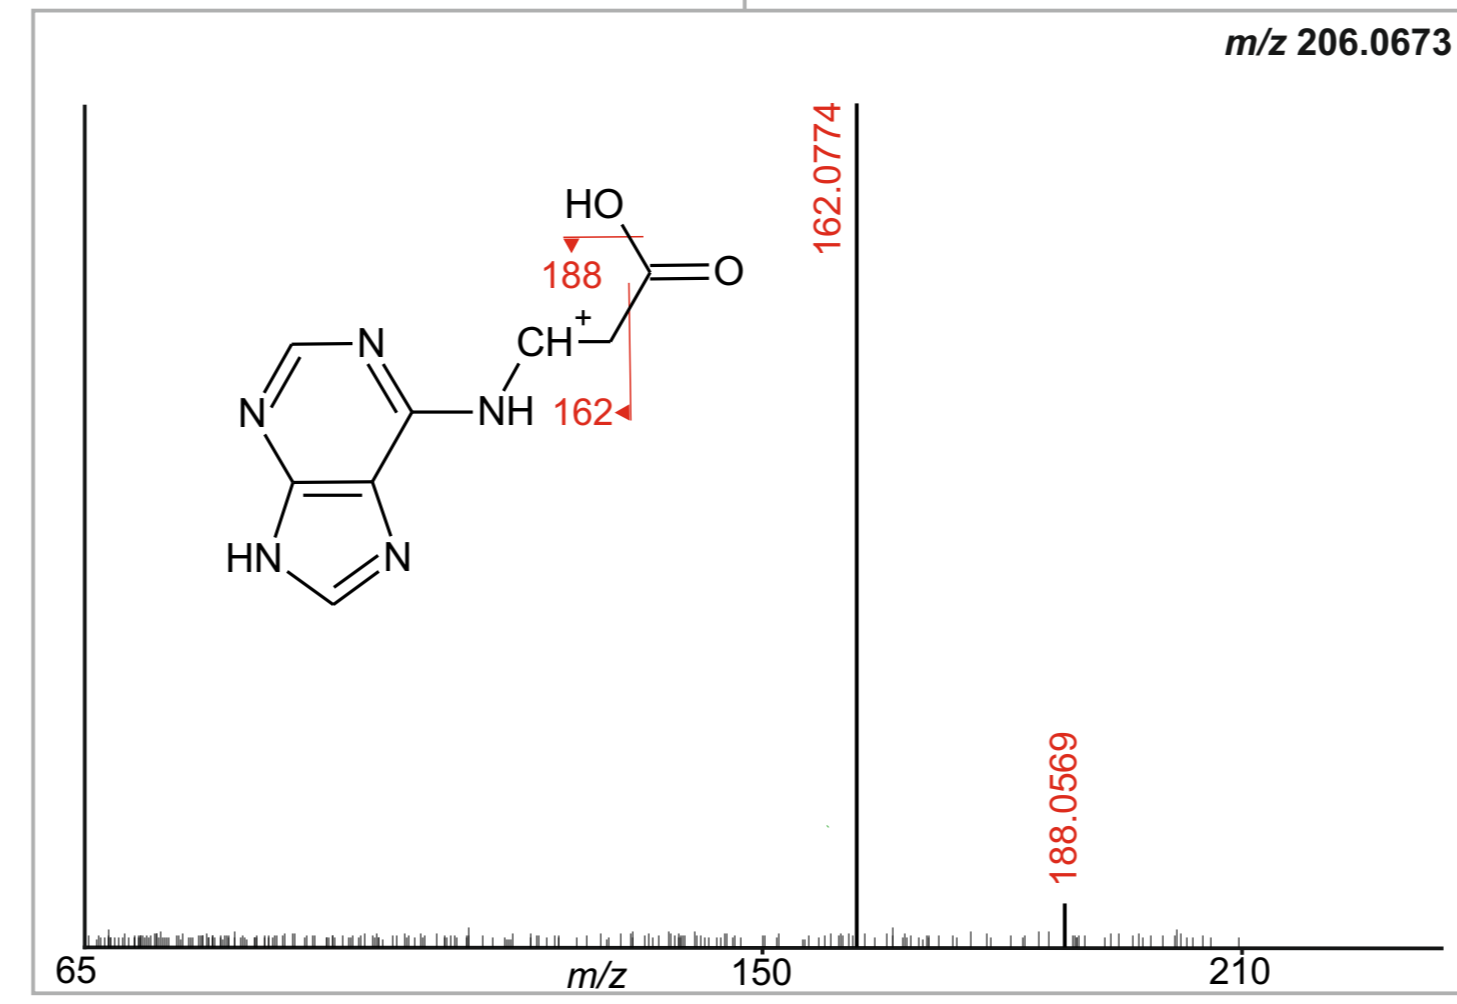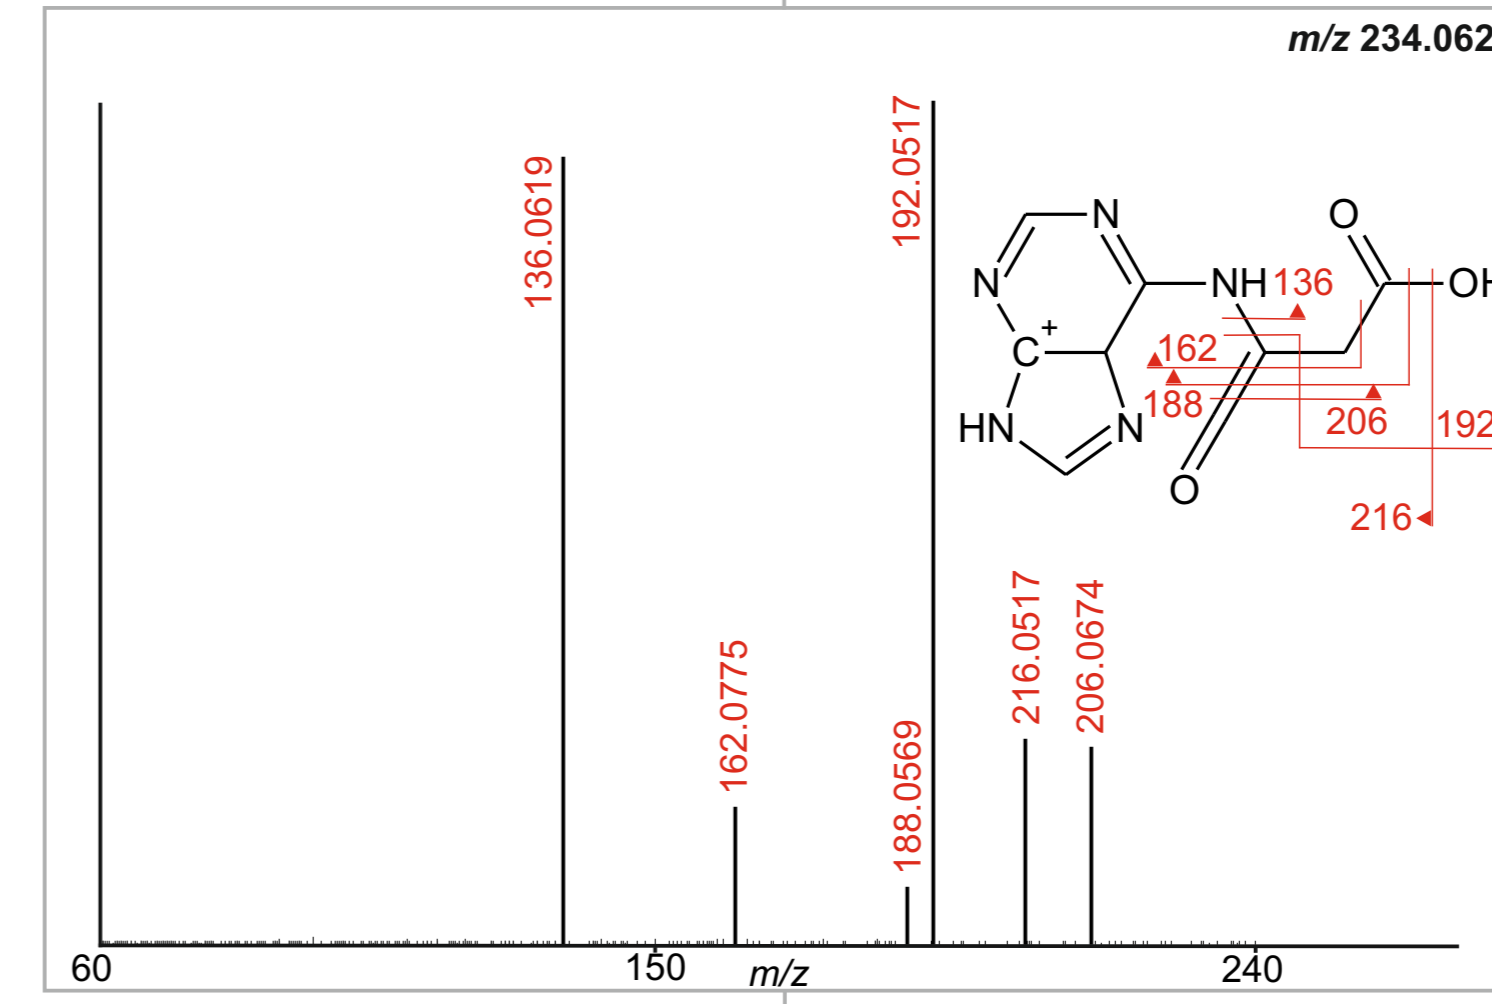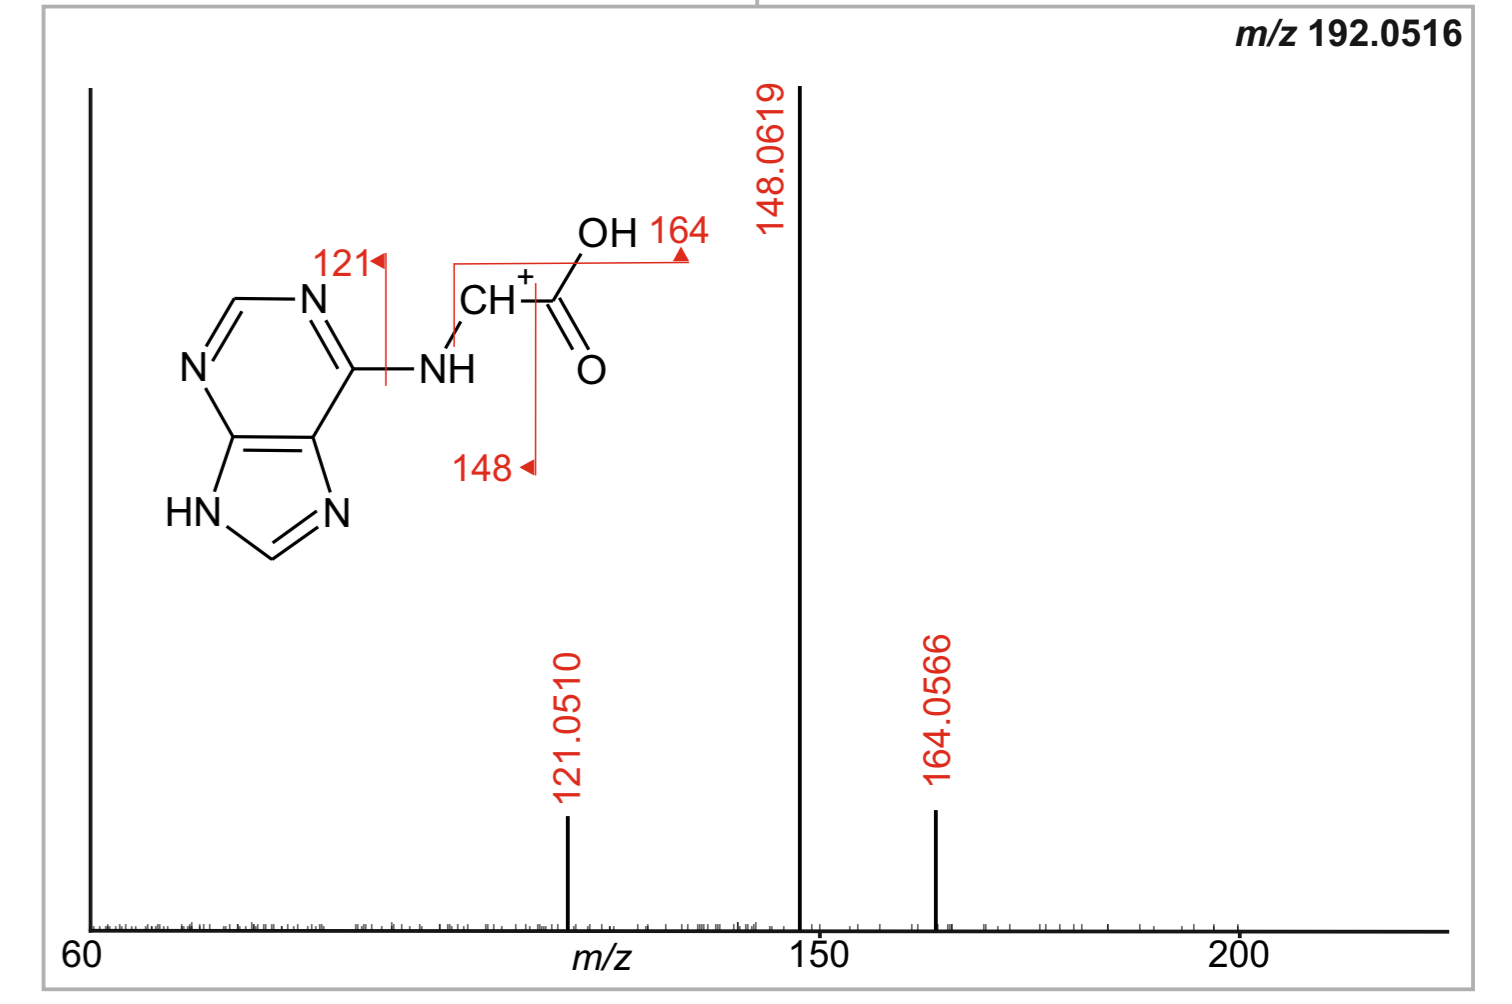

MS<sup>4</sup>

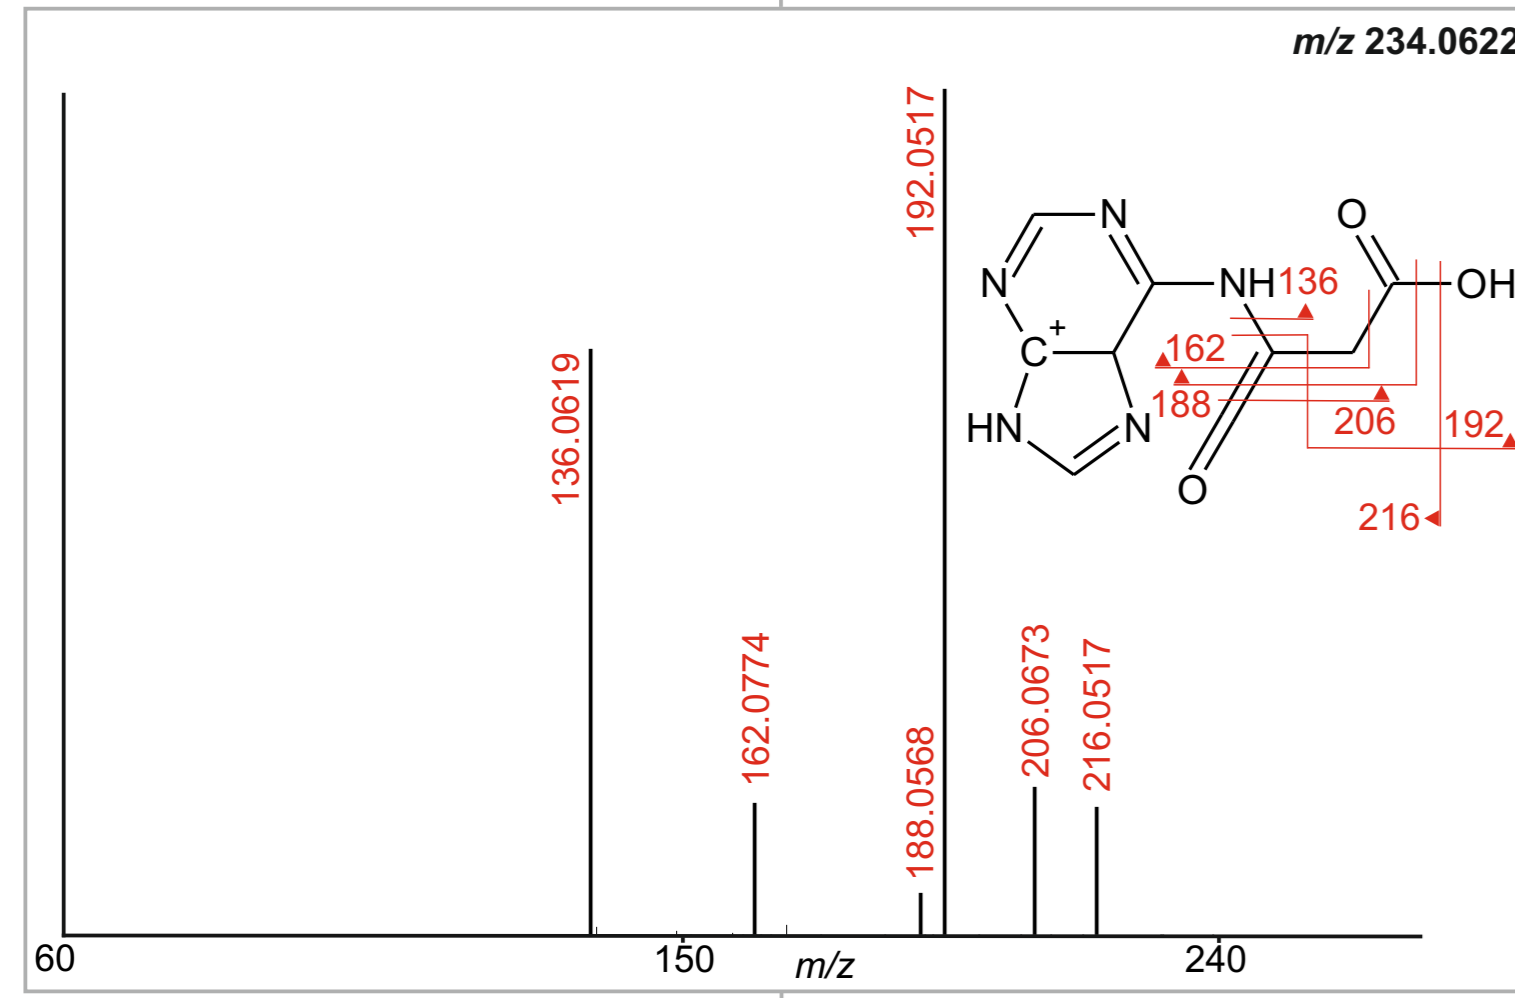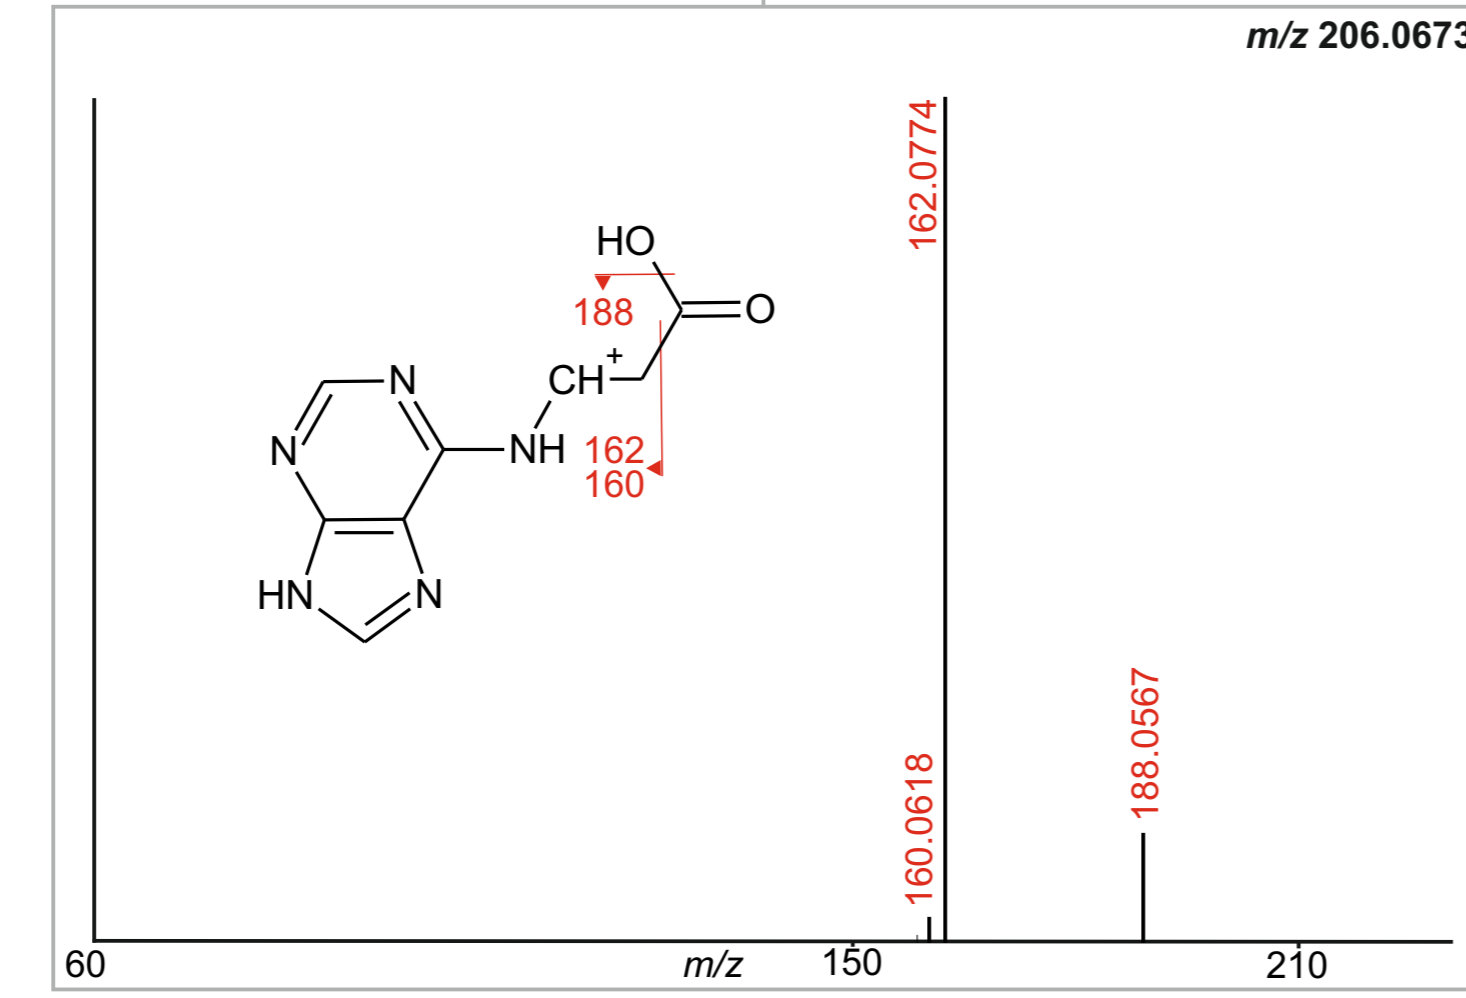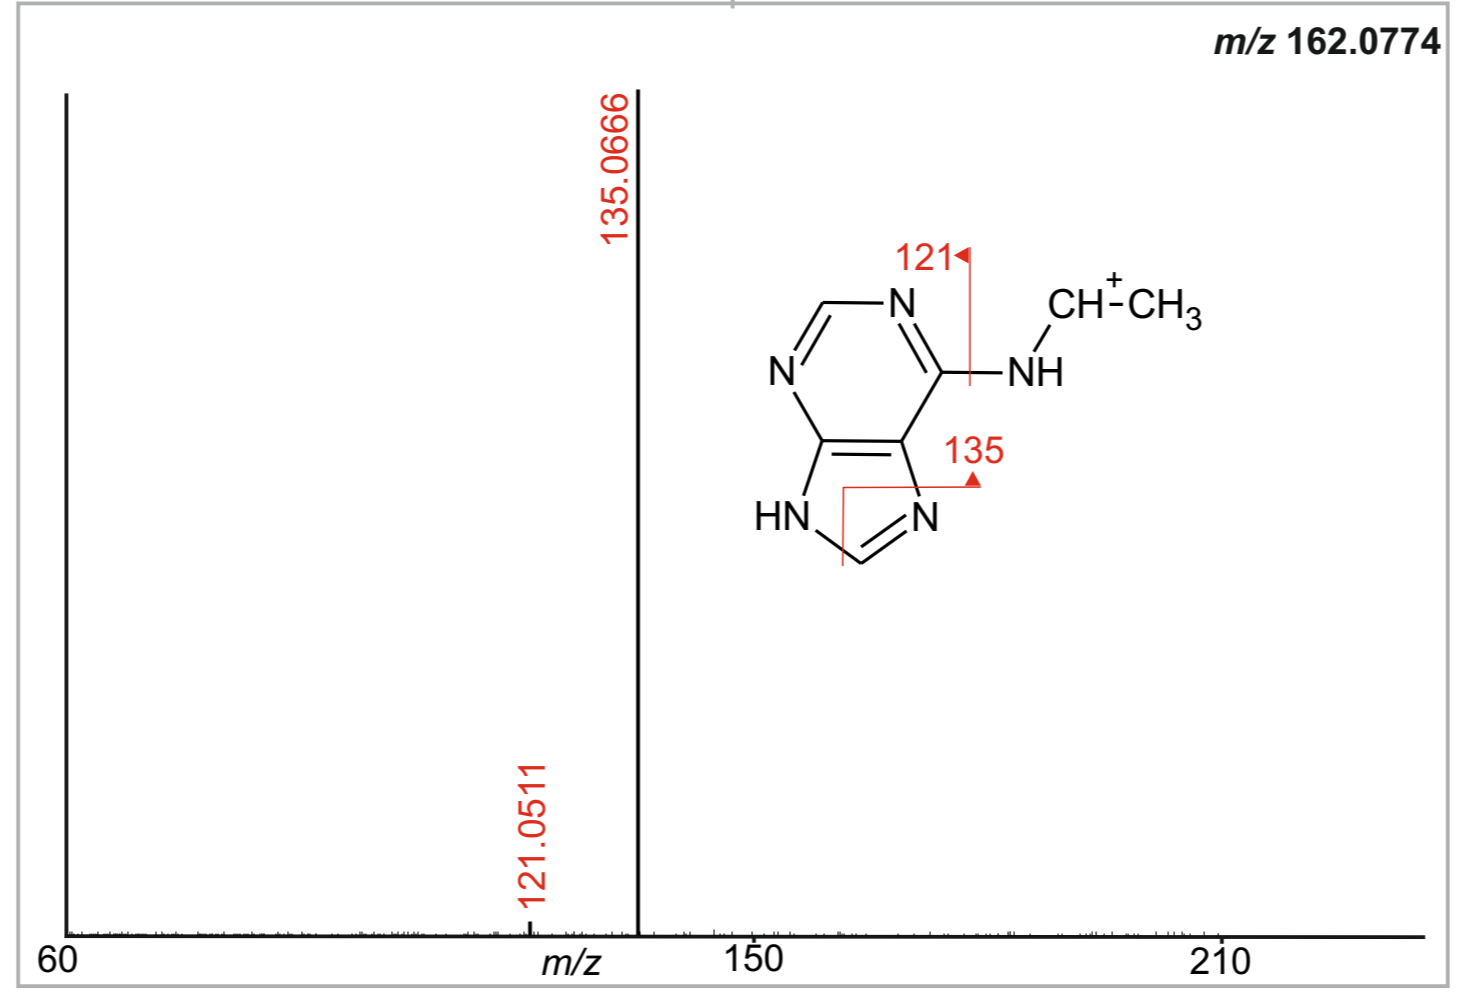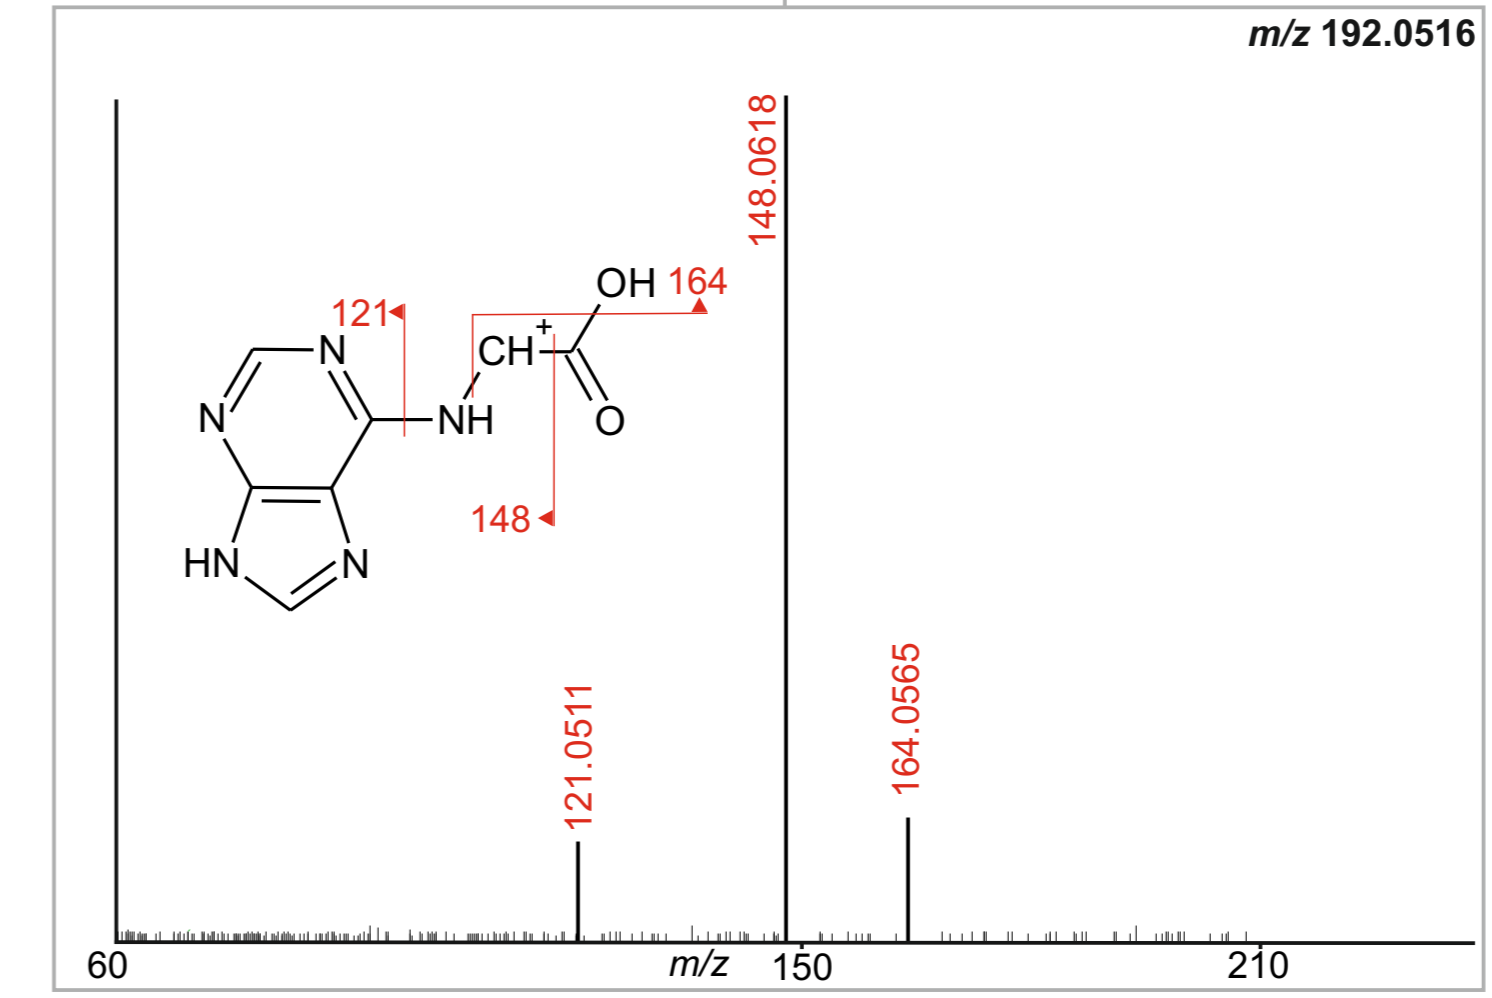

MS<sup>5</sup>

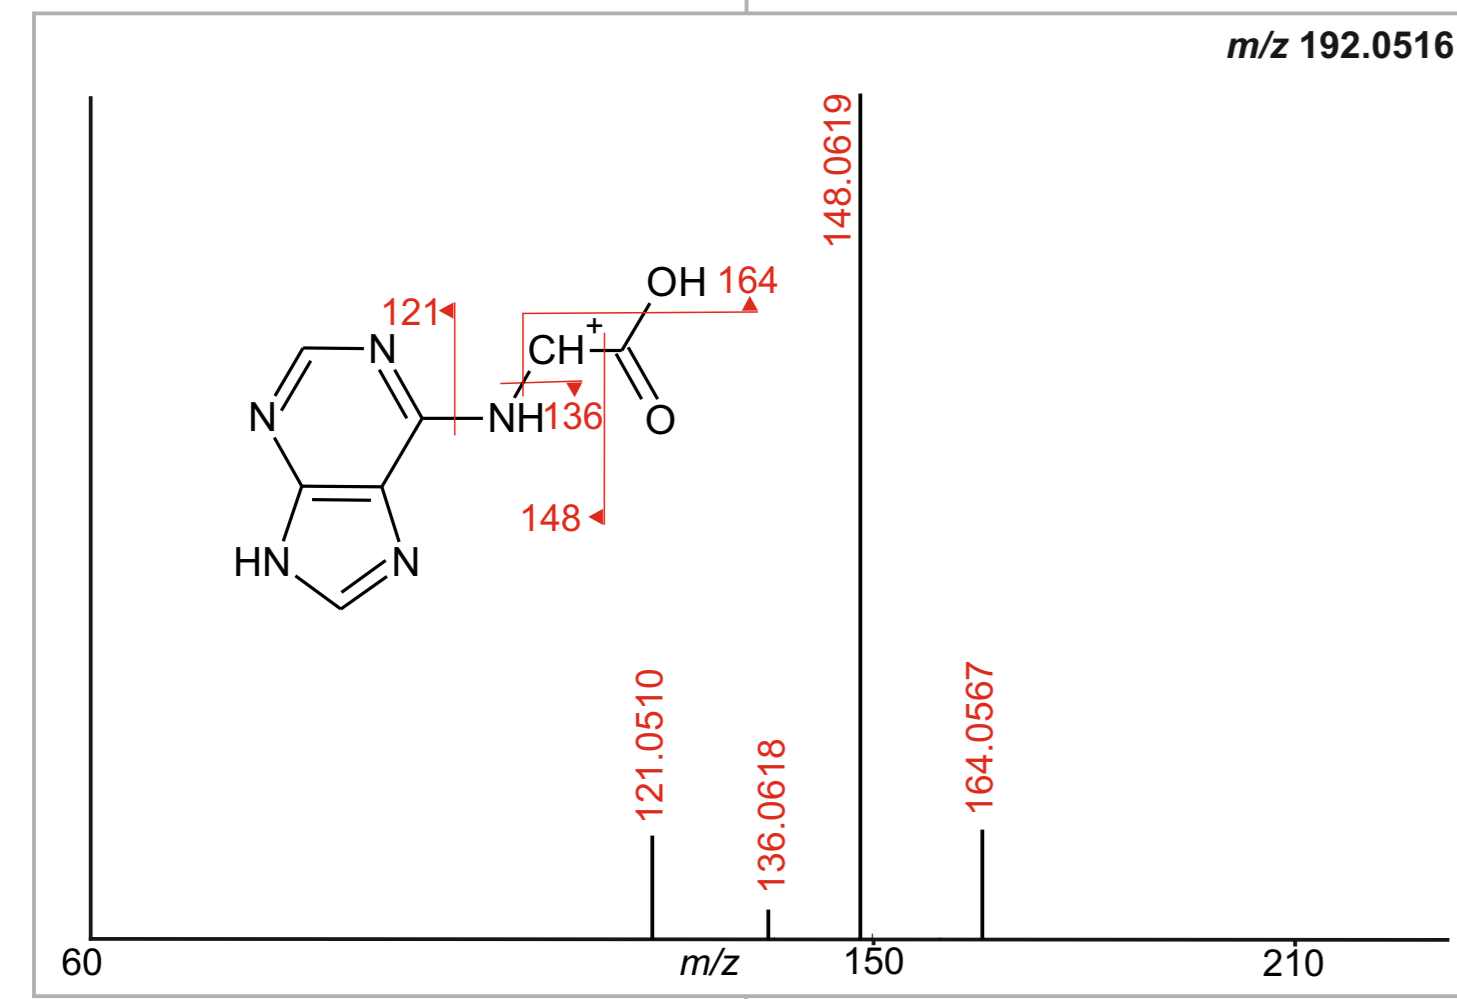

MS<sup>6</sup>

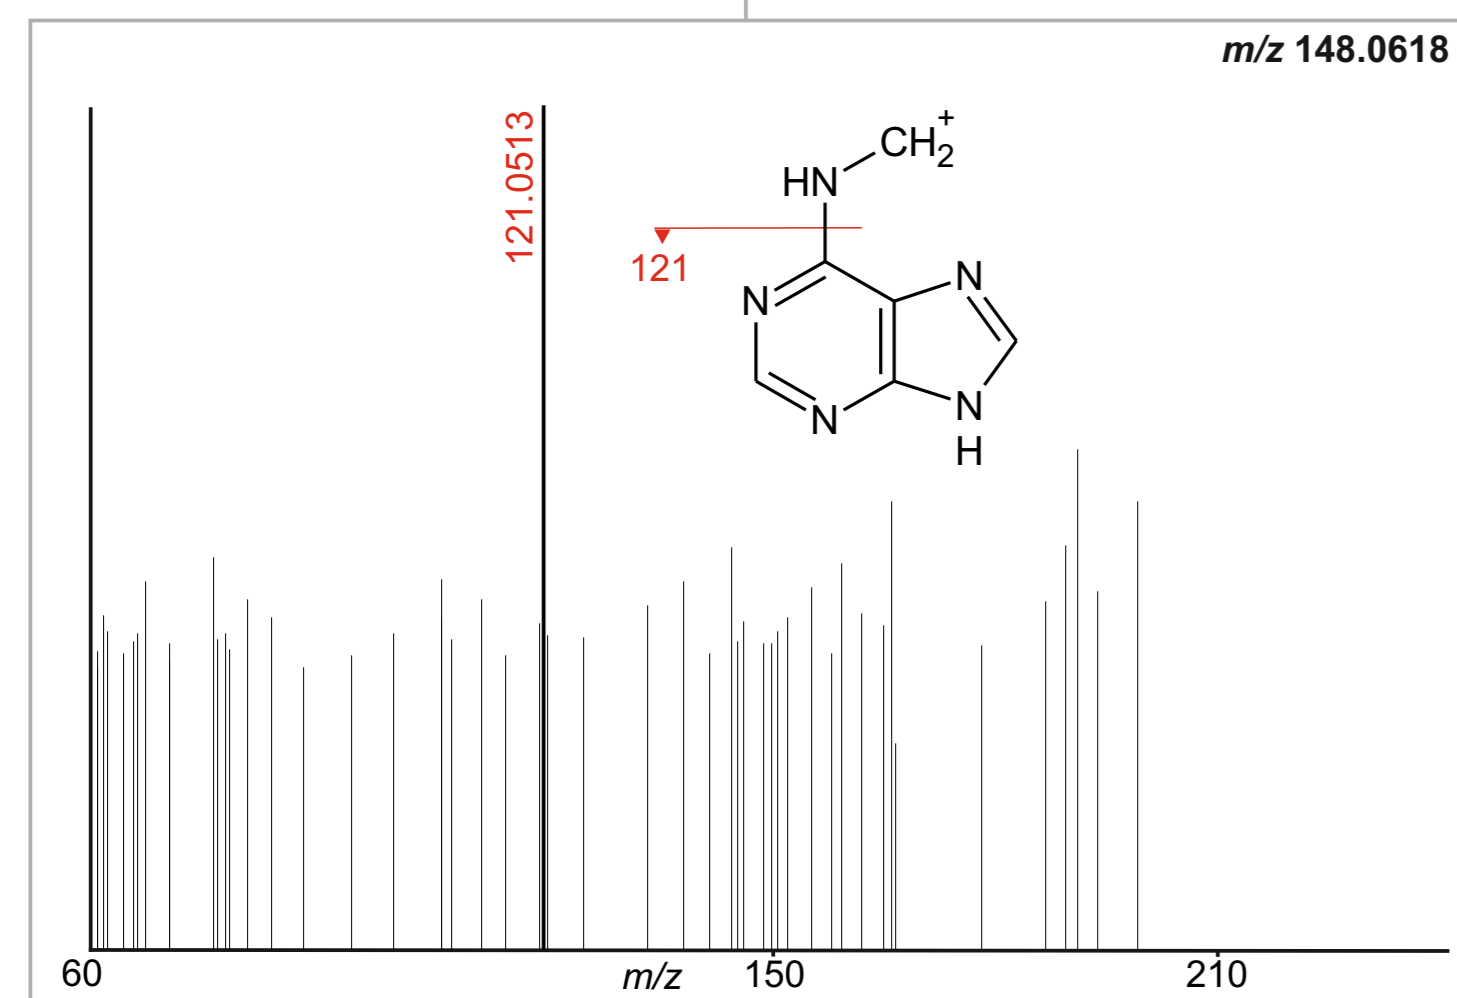

Supplement: pone.0208947.s002.pdf [file pone.0208947.s002.pdf]
